# Supplementary material for: Regioselective synthesis of isoquinolinonediones through remote unactivated C(sp3)–H bonds
Source: Royal Society of Chemistry journal article supplement (doi:10.1039/d4cc00916a), 2024-01-01

## Supplementary Information

### Regioselective Synthesis of Isoquinolinonediones through Remote Unactivated C(sp<sup>3</sup>)-H Bonds

Lei Huang,<sup>a</sup> Jun Sun,<sup>a</sup> Boxuan Sun,<sup>a</sup> Shengjie Song,<sup>a</sup> and Jianjun Li<sup>\*a,b,c</sup>

*a.* Key Laboratory for Green Pharmaceutical Technologies and Related Equipment of Ministry of Education, College of Pharmaceutical Sciences, Zhejiang University of Technology, Hangzhou 310014, P. R. China.

*b.* Key Laboratory of Pharmaceutical Engineering of Zhejiang Province, College of Pharmaceutical Sciences, Zhejiang University of Technology, Hangzhou 310014, P. R. China.

*c.* Taizhou Key Laboratory of Advanced Manufacturing Technology, Taizhou Institute, Zhejiang University of Technology, Taizhou 318014, P. R. China.

\* Corresponding author. E-mail: lijianjun@zjut.edu.cn.

|                    |                                                        |
|--------------------|--------------------------------------------------------|
| <b>Page 1</b>      | <b>General information</b>                             |
| <b>Page 1-2</b>    | <b>Preparation of substrates</b>                       |
| <b>Page 2-3</b>    | <b>Optimization studies</b>                            |
| <b>Page 4</b>      | <b>General procedure for the synthesis of products</b> |
| <b>Page 4</b>      | <b>Gram-scale experiments</b>                          |
| <b>Page 4-5</b>    | <b>Mechanistic studies</b>                             |
| <b>Page 5-33</b>   | <b>Characterization data</b>                           |
| <b>Page 33</b>     | <b>References</b>                                      |
| <b>Page 34-104</b> | <b>Copies of NMR spectra</b>                           |

## 1. General information

The reagents and solvents were purchased from commercial suppliers and used without further purification unless noted. All reactions were monitored by TLC with silica gel-coated plates. Product purification was accomplished by flash chromatography using 200-300 mesh silica gel.  $^1\text{H}$  (400 MHz) NMR,  $^{13}\text{C}$  (101 MHz) NMR, and  $^{19}\text{F}$  (376 MHz) NMR spectra were recorded on a Varian spectrometer in  $\text{CDCl}_3$ . Measurements were done at ambient temperature.  $^1\text{H}$  NMR chemical shifts are referenced to the residual hydrogen signals of the deuterated solvent (7.26 ppm for  $\text{CDCl}_3$ ). The  $^{13}\text{C}$  NMR chemical shifts are referenced to the  $^{13}\text{C}$  signals of the deuterated solvent (77.16 ppm for  $\text{CDCl}_3$ ). Abbreviations used in the description of NMR data are listed as follows: s = singlet, d = doublet, dd = doublet of doublet, t = triplet, m = multiplet. Mass spectra were measured with a HRMS-APCI instrument using ESI ionization.

## 2. Preparation of substrates

### 2.1 General Procedure for the synthesis of *N*-methacryloyl-*N*-methylbenzamide substrates<sup>1-4</sup>

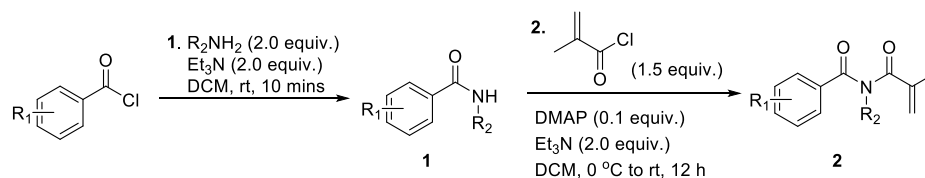

**STEP 1:** A dried round-bottom flask was charged with a magnetic stirring bar, aniline (10 mmol), triethylamine (10 mmol), and DCM (30 mL). Benzoyl chloride (5 mmol) dissolved in DCM (10 mL) was added slowly for 5 mins at room temperature, and the mixture was stirred for 30 mins. The reaction was monitored by TLC. After completion, the reaction was quenched with saturated NaCl solution (100 mL) and extracted with DCM (30 mL). The organic phase was dried over anhydrous  $\text{Na}_2\text{SO}_4$  and concentrated under reduced pressure. The reaction mixture was purified via column chromatography to give **1** (98% yield).

**STEP 2:** A dried round-bottom flask was charged with a magnetic stirring bar, benzamide **1** (5 mmol), triethylamine (10 mmol), DMAP (0.5 mmol), and DCM (30 mL). Methacryloyl chloride (10 mmol) dissolved in DCM (10 mL) was added slowly for 5 mins at 0 °C, and the mixture was stirred for 12 h at room temperature. The reaction was monitored by TLC. After completion, the reaction was quenched with saturated NaCl solution (100 mL) and extracted with DCM (30 mL). The organic phase was dried over anhydrous  $\text{Na}_2\text{SO}_4$  and concentrated under reduced pressure. The reaction mixture was purified via column chromatography to give **2** (91% yield).

### 2.2 General Procedure for the synthesis of *N*-protected amine from free amines and sulfonyl chloride<sup>5-8</sup>

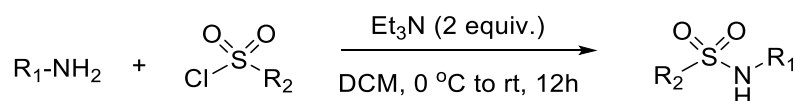

A dried round-bottom flask was charged with a magnetic stirring bar, free amine (5 mmol), triethylamine (10 mmol), and DCM (30 mL). Sulfonyl chloride (10 mmol) dissolved in DCM (10

mL) was added slowly for 5 mins at 0 °C, and the mixture was stirred for 2-12 h at room temperature. The reaction was monitored by TLC. After completion, the reaction was quenched with saturated NaCl solution (100 mL) and extracted with DCM (30 mL). The organic phase was dried over anhydrous Na<sub>2</sub>SO<sub>4</sub> and concentrated under reduced pressure. The reaction mixture was purified via column chromatography to give corresponding sulfonamide products (85-96% yields).

### 2.3 Procedure for the synthesis of ethyl 8-((4-methoxyphenyl)sulfonamido)octanoate<sup>9</sup>

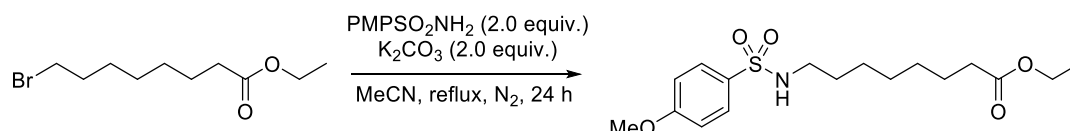

A dried round-bottom flask was charged with a magnetic stirring bar, free amine alkyl bromide (2.0 mmol), *p*-methoxyphenylsulfonamide (4.0 mmol), K<sub>2</sub>CO<sub>3</sub> (4.0 mmol), and MeCN (10 mL). Then the reaction mixture was heated to reflux for 12 hours. After being cooled to room temperature, the reaction was quenched with saturated NaCl solution (50 mL) and extracted with EtOAc (15 mL). The organic phase was dried over anhydrous Na<sub>2</sub>SO<sub>4</sub> and concentrated under reduced pressure. The reaction mixture was purified via column chromatography to give the desired product (63% yield).

### 2.4 General Procedure for the synthesis of *N*-protected amine substrates from free alcohol intermediates and acid<sup>9</sup>

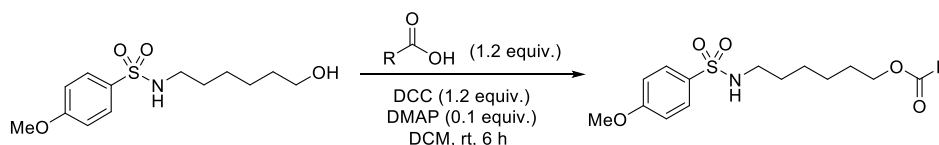

A dried round-bottom flask was charged with a magnetic stirring bar, *N*-(6-hydroxyhexyl)-4-methoxybenzenesulfonamide (1.0 mmol), acid (1.2 mmol), DCC (1.2 mmol), DMAP (0.1 mmol) and DCM (10 mL). The mixture was stirred for 6 h at room temperature. The reaction was monitored by TLC. After completion, the reaction was quenched with saturated NaCl solution (50 mL) and extracted with DCM (15 mL). The organic phase was dried over anhydrous Na<sub>2</sub>SO<sub>4</sub> and concentrated under reduced pressure. The reaction mixture was purified via column chromatography to give the desired products (64% yield).

### 2.5 Unsuccessful substrates

carboxamides:

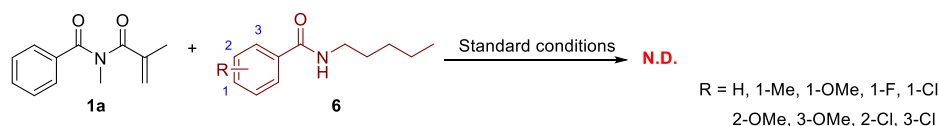

phosphoramides:

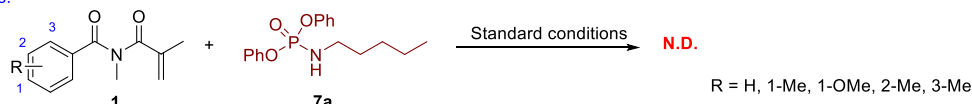

Standard conditions: AgNO<sub>3</sub> (10 mol%) and K<sub>2</sub>S<sub>2</sub>O<sub>8</sub> (2.0 equiv.) in MeCN/H<sub>2</sub>O (1 mL/1 mL) under air atmosphere and stirred at 60 °C for 9 h.

## 3. Optimization studies

### 3.1 Optimization of the conditions for the cascade addition/cyclization of aliphatic alcohols

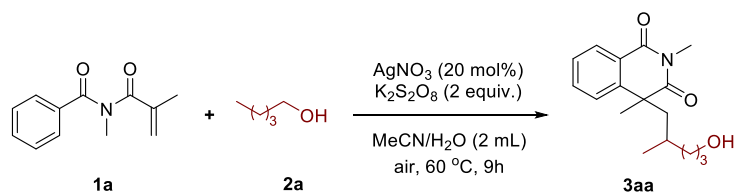

| Entry | Changes from standard conditions <sup>a</sup>                                                                            | Yield <sup>b</sup> (%) |
|-------|--------------------------------------------------------------------------------------------------------------------------|------------------------|
| 1     | None                                                                                                                     | 76                     |
| 2     | NMP / H <sub>2</sub> O as solvent                                                                                        | N.D.                   |
| 3     | DMA / H <sub>2</sub> O as solvent                                                                                        | 35                     |
| 4     | DMF / H <sub>2</sub> O as solvent                                                                                        | 47                     |
| 5     | DMSO / H <sub>2</sub> O as solvent                                                                                       | N.D.                   |
| 6     | DMPU / H <sub>2</sub> O as solvent                                                                                       | 17                     |
| 7     | Acetone / H <sub>2</sub> O as solvent                                                                                    | 42                     |
| 8     | AgCl, Ag <sub>2</sub> CO <sub>3</sub> , CF <sub>3</sub> COOAg, CuCl <sub>2</sub> , FeCl <sub>3</sub> as catalyst         | 55, 59, 46, N.D., N.D. |
| 9     | Na <sub>2</sub> S <sub>2</sub> O <sub>8</sub> , (NH <sub>4</sub> ) <sub>2</sub> S <sub>2</sub> O <sub>8</sub> as oxidant | 66, 48                 |
| 10    | 1 equiv. of K <sub>2</sub> S <sub>2</sub> O <sub>8</sub>                                                                 | 64                     |
| 11    | 10 mol% of AgNO <sub>3</sub>                                                                                             | 58                     |
| 12    | Without K <sub>2</sub> S <sub>2</sub> O <sub>8</sub>                                                                     | N.D.                   |
| 13    | Without AgNO <sub>3</sub>                                                                                                | N.D.                   |
| 14    | 100 °C, 80 °C, 40 °C                                                                                                     | 34, 51, 39             |

<sup>a</sup> Reaction condition: **1a** (0.3 mmol), **2a** (0.9 mmol), AgNO<sub>3</sub> (20 mol%), and K<sub>2</sub>S<sub>2</sub>O<sub>8</sub> (2.0 equiv.) in MeCN/H<sub>2</sub>O (1 mL/1 mL) under air atmosphere and stirred at 60 °C for 9 h. <sup>b</sup> Isolated yields based on **1a**.

### 3.2 Optimization of the conditions for the cascade addition/cyclization of sulfonamides

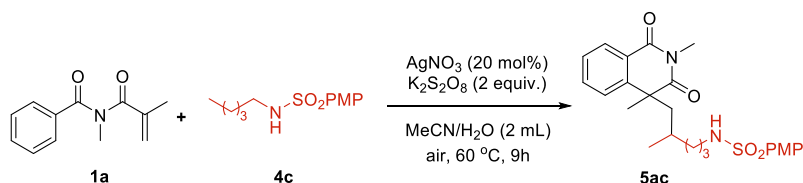

| Entry | Changes from standard conditions <sup>a</sup>                                                                            | Yield <sup>b</sup> (%) |
|-------|--------------------------------------------------------------------------------------------------------------------------|------------------------|
| 1     | None                                                                                                                     | 72                     |
| 2     | NMP / H <sub>2</sub> O as solvent                                                                                        | N.D.                   |
| 3     | DMA / H <sub>2</sub> O as solvent                                                                                        | 28                     |
| 4     | DMF / H <sub>2</sub> O as solvent                                                                                        | 54                     |
| 5     | DMSO / H <sub>2</sub> O as solvent                                                                                       | 36                     |
| 6     | DMPU / H <sub>2</sub> O as solvent                                                                                       | 24                     |
| 7     | Acetone / H <sub>2</sub> O as solvent                                                                                    | 61                     |
| 8     | AgCl, Ag <sub>2</sub> CO <sub>3</sub> , CF <sub>3</sub> COOAg, CuCl <sub>2</sub> , FeCl <sub>3</sub> as catalyst         | 44, 67, 51, N.D., N.D. |
| 9     | Na <sub>2</sub> S <sub>2</sub> O <sub>8</sub> , (NH <sub>4</sub> ) <sub>2</sub> S <sub>2</sub> O <sub>8</sub> as oxidant | 58, 55                 |
| 10    | 1 equiv. of K <sub>2</sub> S <sub>2</sub> O <sub>8</sub>                                                                 | 59                     |
| 11    | 10 mol% of AgNO <sub>3</sub>                                                                                             | 64                     |
| 12    | Without K <sub>2</sub> S <sub>2</sub> O <sub>8</sub>                                                                     | N.D.                   |
| 13    | Without AgNO <sub>3</sub>                                                                                                | N.D.                   |
| 14    | 100 °C, 80 °C, 40 °C                                                                                                     | 29, 48, 55             |

<sup>a</sup> Reaction condition: **1a** (0.3 mmol), **4c** (0.33 mmol), AgNO<sub>3</sub> (20 mol%), and K<sub>2</sub>S<sub>2</sub>O<sub>8</sub> (2.0 equiv.) in MeCN/H<sub>2</sub>O (1 mL/1 mL) under air atmosphere and stirred at 60 °C for 9 h. <sup>b</sup> Isolated yields based on **1a**.

#### 4. General procedure for the synthesis of products (3aa as an example)

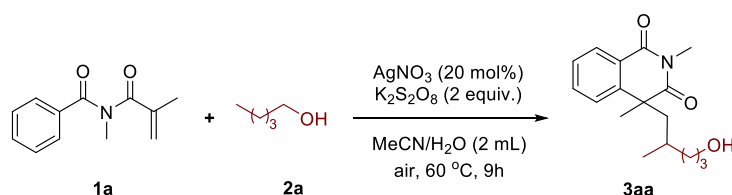

To a Schlenk-tube was charged with **1a** (0.3 mmol), **2a** (0.9 mmol),  $\text{AgNO}_3$  (0.06 mmol),  $\text{K}_2\text{S}_2\text{O}_8$  (0.6 mmol),  $\text{MeCN}$  (1.0 mL) and  $\text{H}_2\text{O}$  (1.0 mL). The mixture was stirred at  $60^\circ\text{C}$  for 9 hours. After completion, the reaction was quenched with saturated  $\text{NaCl}$  solution (10 mL) and extracted with  $\text{EtOAc}$  (4 mL). The organic phase was dried over anhydrous  $\text{Na}_2\text{SO}_4$  and concentrated under reduced pressure. The crude product was purified by chromatography on silica gel column ( $\text{PE}/\text{EtOAc} = 6/1-4/1$ ) to afford **3aa** (76%) as a yellow oil.

#### 5. Gram-scale experiments (3aa and 5ac, 3aa as an example)

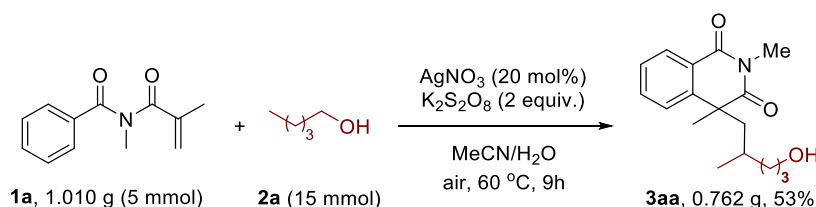

A 250 mL dried round-bottom flask was charged with a magnetic stirring bar, *N*-methacryloyl-*N*-methylbenzamide (5 mmol), 1-pentanol (15 mmol), silver nitrate (1 mmol),  $\text{K}_2\text{S}_2\text{O}_8$  (10 mmol),  $\text{MeCN}$  (10 mL) and  $\text{H}_2\text{O}$  (10 mL). The resulting mixture was stirred at  $60^\circ\text{C}$  using an oil bath for 9 hours. After completion, the reaction was quenched with saturated  $\text{NaCl}$  solution (30 mL) and extracted with  $\text{EtOAc}$  (10 mL). The organic phase was dried over anhydrous  $\text{Na}_2\text{SO}_4$  and concentrated under reduced pressure. The crude product was purified by column chromatography. Compound **3aa** was isolated in 53% yield (0.762 g) as a yellow oil.

#### 6. Mechanistic studies

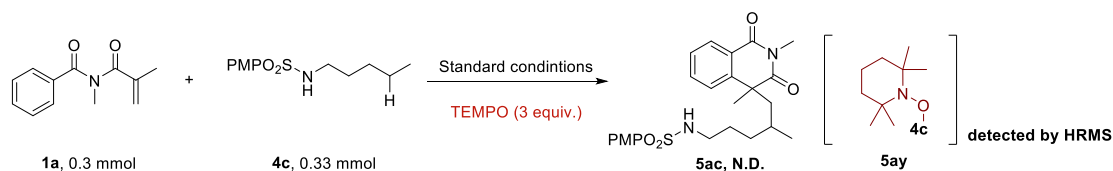

Standard conditions:  $\text{AgNO}_3$  (10 mol%) and  $\text{K}_2\text{S}_2\text{O}_8$  (2.0 equiv.) in  $\text{MeCN}/\text{H}_2\text{O}$  (1 mL/1 mL) under air atmosphere and stirred at  $60^\circ\text{C}$  for 9 h.

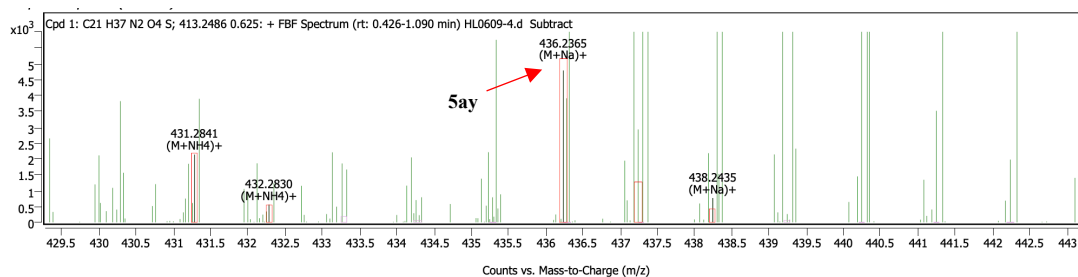

The reaction was completely inhibited by radical inhibitors 2,2,6,6-tetramethyl-1-piperidinyloxy (TEMPO), and the radical adducts **5ay** was detected by HRMS ( $[M+Na]^+ = 436.2365$ ).

## 7. Characterization data

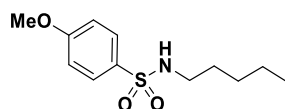

### 4-methoxy-N-pentylbenzenesulfonamide (4c)

Prepared on a 10 mmol scale. The crude was purified by silica gel column chromatography with petroleum ether/ethyl acetate (5:1-4:1). White oil, yield 95%.

$^1\text{H NMR}$  (400 MHz,  $\text{CDCl}_3$ )  $\delta$  7.79 – 7.75 (m, 2H), 6.94 – 6.89 (m, 2H), 5.19 (s, 1H), 3.80 (dd,  $J = 8.2, 4.1$  Hz, 3H), 2.86 – 2.79 (m, 2H), 1.44 – 1.33 (m, 2H), 1.19 – 1.14 (m, 4H), 0.79 – 0.73 (m, 3H).

$^{13}\text{C NMR}$  (101 MHz,  $\text{CDCl}_3$ )  $\delta$  162.75, 162.73, 131.53, 129.18, 129.17, 114.19, 55.60, 43.15, 29.10, 29.08, 28.64, 22.11, 13.86, 13.85.

Data are consistent with reported in the literature<sup>9</sup>.

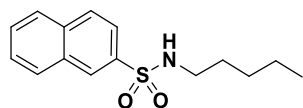

### N-pentyl-naphthalene-2-sulfonamide (4m)

Prepared on a 10 mmol scale. The crude was purified by silica gel column chromatography with petroleum ether/ethyl acetate (5:1-4:1). White oil, yield 94%.

$^1\text{H NMR}$  (400 MHz,  $\text{CDCl}_3$ )  $\delta$  8.46 – 8.45 (m, 1H), 7.99 – 7.93 (m, 2H), 7.93 – 7.82 (m, 2H), 7.66 – 7.57 (m, 2H), 5.03 (s, 1H), 2.99 – 2.95 (m, 2H), 1.49 – 1.42 (m, 2H), 1.25 – 1.17 (m, 4H), 0.81 – 0.76 (m, 3H).

$^{13}\text{C NMR}$  (101 MHz,  $\text{CDCl}_3$ )  $\delta$  136.79, 136.77, 134.80, 132.18, 129.51, 129.24, 128.75, 128.45, 127.92, 127.54, 122.39, 122.37, 43.31, 29.29, 29.26, 28.64, 22.12, 13.85.

**HRMS** (ESI)  $m/z$ :  $[M + H]^+$  Calcd for  $\text{C}_{15}\text{H}_{19}\text{NO}_2\text{S}$ : 278.1209. Found: 278.1210.

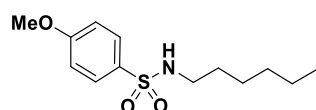

### N-hexyl-4-methoxybenzenesulfonamide (4n)

Prepared on a 10 mmol scale. The crude was purified by silica gel column chromatography with petroleum ether/ethyl acetate (5:1-4:1). White oil, yield 96%.

$^1\text{H NMR}$  (400 MHz,  $\text{CDCl}_3$ )  $\delta$  7.80 (d,  $J = 8.9$  Hz, 2H), 6.97 (d,  $J = 8.9$  Hz, 2H), 4.43 (s, 1H), 3.86

(s, 3H), 2.90 (t,  $J = 7.1$  Hz, 2H), 1.49 – 1.38 (m, 2H), 1.31 – 1.13 (m, 6H), 0.83 (t,  $J = 7.0$  Hz, 3H).  
 $^{13}\text{C}$  NMR (101 MHz,  $\text{CDCl}_3$ )  $\delta$  162.81, 131.66, 129.20, 114.20, 55.59, 43.19, 31.23, 29.49, 26.19, 22.44, 13.91.

Data are consistent with reported in the literature<sup>9</sup>.

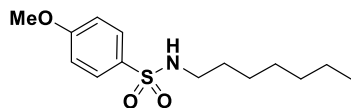

#### **N-heptyl-4-methoxybenzenesulfonamide (4o)**

Prepared on a 10 mmol scale. The crude was purified by silica gel column chromatography with petroleum ether/ethyl acetate (5:1-4:1). White oil, yield 93%.

$^1\text{H}$  NMR (400 MHz,  $\text{CDCl}_3$ )  $\delta$  7.80 (d,  $J = 8.6$  Hz, 2H), 6.97 (d,  $J = 8.6$  Hz, 2H), 4.52 (s, 1H), 3.86 (s, 3H), 2.93 – 2.88 (m, 2H), 1.50 – 1.36 (m, 2H), 1.32 – 1.12 (m, 8H), 0.85 (t,  $J = 6.6$  Hz, 3H).

$^{13}\text{C}$  NMR (101 MHz,  $\text{CDCl}_3$ )  $\delta$  162.82, 131.58, 129.23, 114.21, 55.61, 43.19, 31.63, 29.51, 28.74, 26.49, 22.52, 14.04.

Data are consistent with reported in the literature<sup>9</sup>.

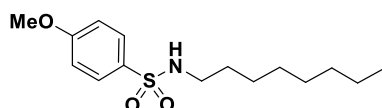

#### **4-methoxy-N-octylbenzenesulfonamide (4p)**

Prepared on a 10 mmol scale. The crude was purified by silica gel column chromatography with petroleum ether/ethyl acetate (5:1-4:1). White oil, yield 95%.

$^1\text{H}$  NMR (400 MHz,  $\text{CDCl}_3$ )  $\delta$  7.80 (d,  $J = 8.9$  Hz, 2H), 6.97 (d,  $J = 7.5$  Hz, 2H), 4.67 (s, 1H), 3.86 (s, 3H), 2.90 (t,  $J = 7.2$  Hz, 2H), 1.49 – 1.35 (m, 2H), 1.30 – 1.13 (m, 10H), 0.85 (t,  $J = 6.1$  Hz, 3H).

$^{13}\text{C}$  NMR (101 MHz,  $\text{CDCl}_3$ )  $\delta$  162.81, 131.67, 129.20, 114.20, 55.58, 43.18, 31.70, 29.51, 29.07, 29.01, 26.52, 22.58, 14.03.

Data are consistent with reported in the literature<sup>9</sup>.

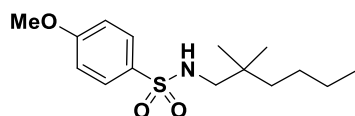

#### **N-(2,2-dimethylheptyl)-4-methoxybenzenesulfonamide (4q)**

Prepared on a 10 mmol scale. The crude was purified by silica gel column chromatography with petroleum ether/ethyl acetate (5:1-4:1). White oil, yield 87%.

$^1\text{H}$  NMR (400 MHz,  $\text{CDCl}_3$ )  $\delta$  7.80 (d,  $J = 9.0$  Hz, 2H), 6.97 (d,  $J = 9.0$  Hz, 2H), 4.56 (t,  $J = 6.7$  Hz, 1H), 3.86 (s, 3H), 2.66 (d,  $J = 6.8$  Hz, 2H), 1.26 – 1.05 (m, 6H), 0.85 (t,  $J = 7.2$  Hz, 3H), 0.82 (s, 6H).

$^{13}\text{C}$  NMR (101 MHz,  $\text{CDCl}_3$ )  $\delta$  162.79, 131.74, 129.20, 114.19, 55.57, 52.99, 39.28, 33.64, 25.87, 24.92, 23.39, 14.01.

HRMS (ESI)  $m/z$ :  $[\text{M} + \text{H}]^+$  Calcd for  $\text{C}_{15}\text{H}_{25}\text{NO}_3\text{S}$ : 300.1628. Found: 300.1629.

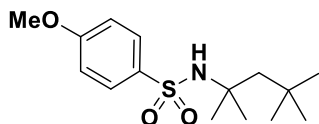

**4-methoxy-N-(2,4,4-trimethylpentan-2-yl)benzenesulfonamide (4r)**

Prepared on a 10 mmol scale. The crude was purified by silica gel column chromatography with petroleum ether/ethyl acetate (5:1-4:1). White oil, yield 84%.

<sup>1</sup>H NMR (400 MHz, CDCl<sub>3</sub>) δ 7.87 – 7.76 (m, 2H), 7.00 – 6.88 (m, 2H), 4.58 (s, 1H), 3.86 (d, *J* = 0.9 Hz, 3H), 1.52 (s, 2H), 1.24 (d, *J* = 1.2 Hz, 6H), 0.98 (d, *J* = 0.9 Hz, 9H).

<sup>13</sup>C NMR (101 MHz, CDCl<sub>3</sub>) δ 162.41, 135.45, 129.12, 113.94, 58.44, 55.65, 55.58, 31.63, 29.38.

HRMS (ESI) *m/z*: [M + H]<sup>+</sup> Calcd for C<sub>15</sub>H<sub>25</sub>NO<sub>3</sub>S: 300.1628. Found: 300.1630.

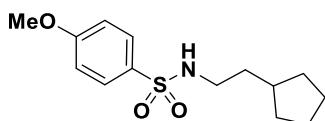

**N-(2-cyclopentylethyl)-4-methoxybenzenesulfonamide (4s)**

Prepared by **General Procedure C** on a 10 mmol scale. The crude was purified by silica gel column chromatography with petroleum ether/ethyl acetate (5:1-4:1). White oil, yield 89%.

<sup>1</sup>H NMR (400 MHz, CDCl<sub>3</sub>) δ 7.84 – 7.72 (m, 2H), 7.01 – 6.92 (m, 2H), 4.56 (t, *J* = 6.2 Hz, 1H), 3.86 (s, 3H), 2.93 – 2.90 (m, 2H), 1.76 – 1.63 (m, 3H), 1.59 – 1.52 (m, 2H), 1.49 – 1.41 (m, 4H), 1.04 – 0.94 (m, 2H).

<sup>13</sup>C NMR (101 MHz, CDCl<sub>3</sub>) δ 162.80, 131.58, 129.21, 114.20, 55.61, 42.60, 37.30, 35.78, 32.41, 24.99.

HRMS (ESI) *m/z*: [M + H]<sup>+</sup> Calcd for C<sub>14</sub>H<sub>21</sub>NO<sub>3</sub>S: 284.1315. Found: 284.1316.

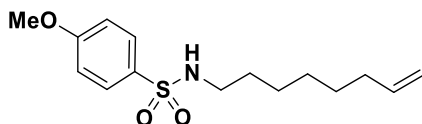

**4-methoxy-N-(oct-7-en-1-yl)benzenesulfonamide (4t)**

Prepared on a 10 mmol scale. The crude was purified by silica gel column chromatography with petroleum ether/ethyl acetate (5:1-4:1). White oil, yield 88%.

<sup>1</sup>H NMR (400 MHz, CDCl<sub>3</sub>) δ 7.80 (d, *J* = 7.7 Hz, 2H), 6.97 (d, *J* = 7.4 Hz, 2H), 5.81 – 5.71 (m, 1H), 4.98 – 4.90 (m, 2H), 4.52 (s, 1H), 3.86 (s, 3H), 2.90 (d, *J* = 7.2 Hz, 2H), 2.01 – 1.96 (m, 2H), 1.46 – 1.40 (m, 2H), 1.36 – 1.18 (m, 6H).

<sup>13</sup>C NMR (101 MHz, CDCl<sub>3</sub>) δ 162.83, 138.87, 131.60, 129.22, 114.35, 114.22, 55.61, 43.15, 33.59, 29.47, 28.65, 28.51, 26.36.

HRMS (ESI) *m/z*: [M + H]<sup>+</sup> Calcd for C<sub>15</sub>H<sub>23</sub>NO<sub>3</sub>S: 298.1471. Found: 298.1473.

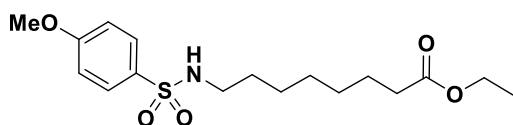

**ethyl 8-((4-methoxyphenyl)sulfonamido)octanoate (4u)**



Prepared on a 10 mmol scale. The crude was purified by silica gel column chromatography with petroleum ether/ethyl acetate (5:1-4:1). White oil, yield 63%.

$^1\text{H NMR}$  (400 MHz,  $\text{CDCl}_3$ )  $\delta$  7.81 (d,  $J = 8.2$  Hz, 2H), 6.99 (d,  $J = 8.2$  Hz, 2H), 4.58 (s, 1H), 4.13 – 4.08 (m, 2H), 3.89 (s, 3H), 2.92 (t,  $J = 6.1$  Hz, 2H), 2.27 (t,  $J = 7.1$  Hz, 2H), 1.66 – 1.52 (m, 2H), 1.52 – 1.37 (m, 2H), 1.35 – 1.16 (m, 9H).

$^{13}\text{C NMR}$  (101 MHz,  $\text{CDCl}_3$ )  $\delta$  173.82, 162.82, 131.55, 129.21, 114.22, 60.23, 55.62, 43.12, 34.25, 29.44, 28.88, 28.68, 26.31, 24.77, 14.26.

Data are consistent with reported in the literature<sup>9</sup>.

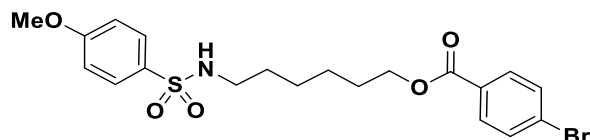

#### **6-((4-methoxyphenyl)sulfonamido)hexyl 4-bromobenzoate (4v)**

Prepared on a 10 mmol scale. The crude was purified by silica gel column chromatography with petroleum ether/ethyl acetate (5:1-4:1). White oil, yield 87%.

$^1\text{H NMR}$  (400 MHz,  $\text{CDCl}_3$ )  $\delta$  7.87 (d,  $J = 8.5$  Hz, 2H), 7.79 (d,  $J = 8.9$  Hz, 2H), 7.57 (d,  $J = 8.5$  Hz, 2H), 6.96 (d,  $J = 8.8$  Hz, 2H), 4.62 (s, 1H), 4.26 (t,  $J = 6.6$  Hz, 2H), 3.85 (s, 3H), 2.92 (t,  $J = 6.8$  Hz, 2H), 1.73 – 1.67 (m, 2H), 1.52 – 1.45 (m, 2H), 1.43 – 1.28 (m, 4H).

$^{13}\text{C NMR}$  (101 MHz,  $\text{CDCl}_3$ )  $\delta$  165.91, 162.86, 131.70, 131.66, 131.08, 129.32, 129.19, 127.96, 114.24, 65.06, 55.60, 43.00, 29.43, 28.50, 26.14, 25.48.

Data are consistent with reported in the literature<sup>9</sup>.

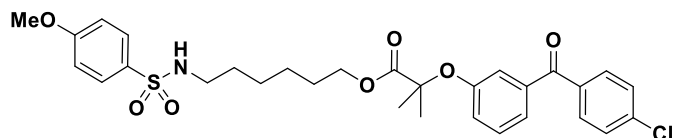

#### **6-((4-methoxyphenyl)sulfonamido)hexyl 2-(3-(4-chlorobenzoyl)phenoxy)-2-methylpropanoate (4w)**

Prepared on a 10 mmol scale. The crude was purified by silica gel column chromatography with petroleum ether/ethyl acetate (5:1-4:1). White oil, yield 82%.

$^1\text{H NMR}$  (400 MHz,  $\text{CDCl}_3$ )  $\delta$  7.80 (d,  $J = 9.0$  Hz, 2H), 7.69 (d,  $J = 8.3$  Hz, 4H), 7.44 (d,  $J = 8.6$  Hz, 2H), 6.97 (d,  $J = 9.0$  Hz, 2H), 6.84 (d,  $J = 8.9$  Hz, 2H), 4.71 (t,  $J = 5.0$  Hz, 1H), 4.11 (t,  $J = 6.4$  Hz, 2H), 3.86 (s, 3H), 2.86 – 2.81 (m, 2H), 1.67 (s, 6H), 1.57 – 1.44 (m, 2H), 1.34 – 1.27 (m, 2H), 1.19 – 1.13 (m, 2H), 1.11 – 1.02 (m, 2H).

$^{13}\text{C NMR}$  (101 MHz,  $\text{CDCl}_3$ )  $\delta$  194.53, 173.74, 162.79, 159.80, 138.60, 136.19, 132.02, 131.69, 131.29, 130.27, 129.21, 128.61, 116.96, 114.20, 79.43, 65.52, 55.61, 43.07, 29.48, 28.22, 26.05, 25.46, 25.34.

Data are consistent with reported in the literature<sup>9</sup>.

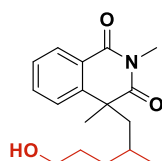

#### **4-(5-hydroxy-2-methylpentyl)-2,4-dimethylisoquinoline-1,3(2*H*,4*H*)-dione (3aa)**

The crude was purified by silica gel column chromatography with petroleum ether/ethyl acetate (6:1-4:1). Yellow oil, yield 76% (dr = 1:1.2).

**<sup>1</sup>H NMR** (400 MHz, CDCl<sub>3</sub>) δ 8.26 – 8.23 (m, 1H), 7.65 – 7.60 (m, 1H), 7.45 – 7.36 (m, 2H), 3.50 – 3.40 (m, 2H), 3.37 (s, 3H), 2.39 (dd, *J* = 14.0, 5.5 Hz, 0.52H), 2.26 (dd, *J* = 14.0, 8.5 Hz, 0.46H), 2.02 (dd, *J* = 13.9, 3.0 Hz, 0.46H), 1.81 (dd, *J* = 14.0, 5.9 Hz, 0.55H), 1.59 (d, *J* = 4.0 Hz, 3H), 1.44 (s, 1H), 1.38 – 1.28 (m, 2H), 1.15 – 0.97 (m, 3H), 0.59 (d, *J* = 6.1 Hz, 1.36H), 0.44 (d, *J* = 6.5 Hz, 1.58H).

**<sup>13</sup>C NMR** (101 MHz, CDCl<sub>3</sub>) δ 176.94, 176.85, 164.50, 164.43, 143.93, 143.57, 133.85, 133.78, 128.88, 127.29, 127.27, 125.85, 125.72, 124.75, 124.61, 62.89, 49.84, 49.06, 47.11, 46.70, 33.92, 32.92, 31.33, 30.78, 30.08, 29.84, 29.73, 29.41, 27.24, 27.18, 20.79, 19.46.

**HRMS** (ESI) *m/z*: [M + H]<sup>+</sup> Calcd for C<sub>17</sub>H<sub>23</sub>NO<sub>3</sub>: 290.1751. Found: 290.1753.

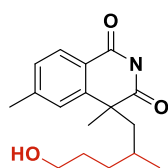

#### **4-(5-hydroxy-2-methylpentyl)-2,4,6-trimethylisoquinoline-1,3(2*H*,4*H*)-dione (3ba)**

The crude was purified by silica gel column chromatography with petroleum ether/ethyl acetate (6:1-4:1). Yellow oil, yield 79% (dr = 1:1).

**<sup>1</sup>H NMR** (400 MHz, CDCl<sub>3</sub>) δ 8.13 – 8.10 (m, 1H), 7.26 – 7.13 (m, 2H), 3.50 – 3.39 (m, 2H), 3.35 (s, 3H), 2.43 (s, 3H), 2.36 (dd, *J* = 14.0, 5.4 Hz, 0.52H), 2.24 (dd, *J* = 14.0, 8.4 Hz, 0.50H), 1.99 (dd, *J* = 14.0, 3.1 Hz, 0.50H), 1.78 (dd, *J* = 14.0, 5.9 Hz, 0.54H), 1.57 (d, *J* = 4.2 Hz, 3H), 1.52 (s, 1H), 1.45 – 1.27 (m, 2H), 1.15 – 0.95 (m, 3H), 0.58 (d, *J* = 6.1 Hz, 1.49H), 0.44 (d, *J* = 6.4 Hz, 1.50H).

**<sup>13</sup>C NMR** (101 MHz, CDCl<sub>3</sub>) δ 177.12, 177.02, 164.52, 164.45, 144.70, 144.60, 143.96, 143.59, 128.90, 128.88, 128.40, 128.37, 126.16, 126.06, 122.27, 122.14, 62.90, 62.87, 49.86, 48.95, 47.04, 46.62, 33.90, 32.95, 31.32, 30.71, 30.07, 29.75, 29.67, 29.43, 27.14, 27.08, 21.98, 20.82, 19.47.

**HRMS** (ESI) *m/z*: [M + H]<sup>+</sup> Calcd for C<sub>18</sub>H<sub>25</sub>NO<sub>3</sub>: 304.1907. Found: 304.1909.

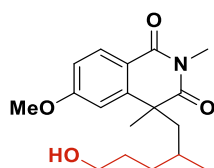

#### **4-(5-hydroxy-2-methylpentyl)-6-methoxy-2,4-dimethylisoquinoline-1,3(2*H*,4*H*)-dione (3ca)**

The crude was purified by silica gel column chromatography with petroleum ether/ethyl acetate (6:1-4:1). Yellow oil, yield 77% (dr = 1:1.5).

**<sup>1</sup>H NMR** (400 MHz, CDCl<sub>3</sub>) δ 8.20 – 8.18 (m, 1H), 6.96 – 6.93 (m, 1H), 6.85 – 6.81 (m, 1H), 3.88 (d, *J* = 1.5 Hz, 3H), 3.48 – 3.42 (m, 2H), 3.34 (s, 3H), 2.37 (dd, *J* = 14.0, 5.5 Hz, 0.60H), 2.25 (dd, *J* = 13.9, 8.5 Hz, 0.42H), 1.97 (dd, *J* = 14.0, 3.1 Hz, 0.40H), 1.76 (dd, *J* = 14.0, 5.9 Hz, 0.64H), 1.57 (d, *J* = 3.7 Hz, 3H), 1.52 (s, 1H), 1.46 – 1.30 (m, 2H), 1.16 – 0.94 (m, 3H), 0.59 (d, *J* = 6.2 Hz, 1.21H), 0.48 (d, *J* = 6.5 Hz, 1.83H).

$^{13}\text{C}$  NMR (101 MHz,  $\text{CDCl}_3$ )  $\delta$  177.03, 176.92, 164.12, 164.08, 164.06, 164.00, 146.21, 145.83, 131.22, 117.83, 117.72, 113.17, 113.12, 110.96, 110.76, 62.90, 62.88, 55.60, 55.59, 49.93, 49.01, 47.30, 46.89, 33.94, 32.92, 31.49, 30.90, 30.07, 29.76, 29.74, 29.43, 27.08, 27.02, 20.85, 19.47.  
**HRMS** (ESI)  $m/z$ :  $[\text{M} + \text{H}]^+$  Calcd for  $\text{C}_{18}\text{H}_{25}\text{NO}_4$ : 320.1856. Found: 320.1858.

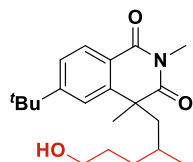

**6-(tert-butyl)-4-(5-hydroxy-2-methylpentyl)-2,4-dimethylisoquinoline-1,3(2H,4H)-dione (3da)**

The crude was purified by silica gel column chromatography with petroleum ether/ethyl acetate (6:1-4:1). Yellow oil, yield 83% (dr = 1:1.2).

$^1\text{H}$  NMR (400 MHz,  $\text{CDCl}_3$ )  $\delta$  8.15 – 8.12 (m, 1H), 7.47 – 7.31 (m, 2H), 3.48 – 3.37 (m, 2H), 3.34 (s, 3H), 2.38 (dd,  $J = 14.0, 4.8$  Hz, 0.55H), 2.23 (dd,  $J = 14.0, 8.4$  Hz, 0.44H), 2.02 (dd,  $J = 14.1, 3.2$  Hz, 0.46H), 1.79 (dd,  $J = 13.9, 5.8$  Hz, 0.57H), 1.68 (s, 1H), 1.57 (d,  $J = 2.9$  Hz, 3H), 1.47 – 1.36 (m, 1H), 1.33 (s, 9H), 1.31 – 1.24 (m, 1H), 1.13 – 0.94 (m, 3H), 0.57 (d,  $J = 6.2$  Hz, 1.34H), 0.38 (d,  $J = 6.2$  Hz, 1.63H).

$^{13}\text{C}$  NMR (101 MHz,  $\text{CDCl}_3$ )  $\delta$  177.23, 177.13, 164.45, 164.38, 157.55, 157.47, 143.48, 143.14, 128.66, 124.62, 124.58, 122.61, 122.39, 122.21, 122.04, 62.84, 62.78, 49.87, 48.94, 47.36, 46.89, 35.30, 33.99, 33.21, 31.35, 31.08, 31.05, 30.80, 30.14, 29.87, 29.84, 29.43, 27.11, 27.05, 20.82, 19.80.

**HRMS** (ESI)  $m/z$ :  $[\text{M} + \text{H}]^+$  Calcd for  $\text{C}_{21}\text{H}_{31}\text{NO}_3$ : 346.2377. Found: 346.2380.

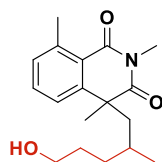

**4-(5-hydroxy-2-methylpentyl)-2,4,8-trimethylisoquinoline-1,3(2H,4H)-dione (3ea)**

The crude was purified by silica gel column chromatography with petroleum ether/ethyl acetate (6:1-4:1). Yellow oil, yield 81% (dr = 1:1.3).

$^1\text{H}$  NMR (400 MHz,  $\text{CDCl}_3$ )  $\delta$  7.48 – 7.44 (m, 1H), 7.31 – 7.20 (m, 2H), 3.52 – 3.41 (m, 2H), 3.34 (s, 3H), 2.78 (d,  $J = 2.1$  Hz, 3H), 2.35 (dd,  $J = 14.0, 5.5$  Hz, 0.58H), 2.24 (dd,  $J = 14.0, 8.4$  Hz, 0.48H), 1.98 (dd,  $J = 14.0, 3.1$  Hz, 0.45H), 1.77 (dd,  $J = 14.0, 5.9$  Hz, 0.62H), 1.58 (d,  $J = 4.1$  Hz, 3H), 1.48 (s, 1H), 1.46 – 1.29 (m, 2H), 1.18 – 0.96 (m, 3H), 0.60 (d,  $J = 6.2$  Hz, 1.28H), 0.47 (d,  $J = 6.5$  Hz, 1.68H).

$^{13}\text{C}$  NMR (101 MHz,  $\text{CDCl}_3$ )  $\delta$  176.65, 176.57, 165.02, 164.95, 145.26, 144.95, 142.48, 142.45, 132.64, 132.56, 131.24, 131.22, 124.13, 124.01, 123.15, 123.05, 62.92, 62.90, 50.36, 49.53, 47.06, 46.65, 33.95, 32.92, 31.53, 30.84, 29.97, 29.75, 29.43, 27.21, 27.16, 24.12, 24.08, 20.85, 19.52.

**HRMS** (ESI)  $m/z$ :  $[\text{M} + \text{H}]^+$  Calcd for  $\text{C}_{18}\text{H}_{25}\text{NO}_3$ : 304.1907. Found: 304.1908.

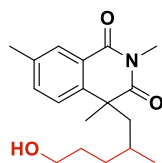

#### **4-(5-hydroxy-2-methylpentyl)-2,4,7-trimethylisoquinoline-1,3(2H,4H)-dione (3fa)**

The crude was purified by silica gel column chromatography with petroleum ether/ethyl acetate (6:1-4:1). Yellow oil, yield 74% (dr = 1:1.9).

<sup>1</sup>H NMR (400 MHz, CDCl<sub>3</sub>) δ 8.06 – 8.00 (m, 1H), 7.45 – 7.38 (m, 1H), 7.33 – 7.26 (m, 1H), 3.48 – 3.42 (m, 2H), 3.36 (s, 3H), 2.41 (s, 3H), 2.36 (dd, *J* = 13.9, 5.5 Hz, 0.66H), 2.24 (dd, *J* = 13.9, 8.6 Hz, 0.39H), 1.99 (dd, *J* = 13.9, 3.0 Hz, 0.38H), 1.78 (dd, *J* = 13.9, 5.8 Hz, 0.66H), 1.55 (d, *J* = 4.3 Hz, 3H), 1.49 (s, 1H), 1.45 – 1.27 (m, 2H), 1.16 – 0.93 (m, 3H), 0.57 (d, *J* = 6.1 Hz, 1.02H), 0.45 (d, *J* = 6.4 Hz, 1.97H).

<sup>13</sup>C NMR (101 MHz, CDCl<sub>3</sub>) δ 177.27, 177.17, 164.78, 164.71, 141.13, 140.75, 137.25, 137.23, 135.02, 134.96, 128.97, 125.89, 125.76, 124.61, 124.47, 63.02, 49.89, 49.05, 46.93, 46.49, 34.07, 33.00, 31.55, 30.94, 30.18, 29.94, 29.86, 29.53, 27.33, 27.27, 21.08, 20.95, 19.48.

HRMS (ESI) *m/z*: [M + H]<sup>+</sup> Calcd for C<sub>18</sub>H<sub>25</sub>NO<sub>3</sub>: 304.1907. Found: 304.1909.

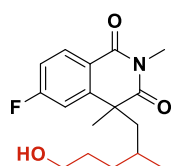

#### **6-fluoro-4-(5-hydroxy-2-methylpentyl)-2,4-dimethylisoquinoline-1,3(2H,4H)-dione (3ga)**

The crude was purified by silica gel column chromatography with petroleum ether/ethyl acetate (6:1-4:1). Yellow oil, yield 67% (dr = 1:1.4).

<sup>1</sup>H NMR (400 MHz, CDCl<sub>3</sub>) δ 8.30 – 8.25 (m, 1H), 7.17 – 7.01 (m, 2H), 3.54 – 3.41 (m, 2H), 3.36 (s, 3H), 2.40 (dd, *J* = 14.1, 5.4 Hz, 0.59H), 2.28 (dd, *J* = 14.1, 8.6 Hz, 0.44H), 1.95 (dd, *J* = 14.0, 3.0 Hz, 0.42H), 1.74 (dd, *J* = 14.0, 5.9 Hz, 0.61H), 1.58 (d, *J* = 4.0 Hz, 3H), 1.47 (s, 1H), 1.40 – 1.28 (m, 2H), 1.17 – 0.96 (m, 3H), 0.59 (d, *J* = 6.2 Hz, 1.27H), 0.48 (d, *J* = 6.4 Hz, 1.77H).

<sup>13</sup>C NMR (101 MHz, CDCl<sub>3</sub>) δ 176.42, 176.31, 167.62, 167.55, 165.07, 165.01, 163.52, 163.46, 147.15, 147.06, 146.74, 146.65, 132.02, 132.00, 131.92, 131.91, 121.25, 121.22, 121.13, 121.10, 115.47, 115.45, 115.25, 115.23, 112.72, 112.58, 112.50, 112.36, 62.85, 49.90, 49.07, 47.37, 47.35, 46.96, 46.94, 33.97, 32.91, 31.33, 30.77, 30.09, 29.86, 29.71, 29.39, 27.25, 27.19, 20.79, 19.33.

<sup>19</sup>F NMR (376 MHz, CDCl<sub>3</sub>) δ -103.54, -103.63.

HRMS (ESI) *m/z*: [M + H]<sup>+</sup> Calcd for C<sub>17</sub>H<sub>22</sub>FNO<sub>3</sub>: 308.1656. Found: 308.1657.

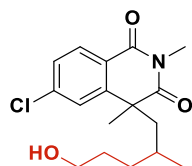

#### **6-chloro-4-(5-hydroxy-2-methylpentyl)-2,4-dimethylisoquinoline-1,3(2H,4H)-dione (3ha)**

The crude was purified by silica gel column chromatography with petroleum ether/ethyl acetate (6:1-4:1). Yellow oil, yield 60% (dr = 1:1.3).

<sup>1</sup>H NMR (400 MHz, CDCl<sub>3</sub>) δ 8.19 – 8.16 (m, 1H), 7.43 – 7.33 (m, 2H), 3.51 – 3.42 (m, 2H), 3.35 (s, 3H), 2.38 (dd, *J* = 14.1, 5.4 Hz, 0.58H), 2.27 (dd, *J* = 14.1, 8.6 Hz, 0.43H), 1.97 (dd, *J* = 14.0, 3.1 Hz, 0.43H), 1.76 (dd, *J* = 14.1, 6.0 Hz, 0.61H), 1.58 (d, *J* = 4.3 Hz, 3H), 1.55 (s, 1H), 1.47 – 1.29 (m, 2H), 1.14 – 1.00 (m, 3H), 0.58 (d, *J* = 6.2 Hz, 1.29H), 0.47 (d, *J* = 6.4 Hz, 1.73H).

$^{13}\text{C}$  NMR (101 MHz,  $\text{CDCl}_3$ )  $\delta$  176.27, 176.15, 163.63, 163.57, 145.71, 145.31, 140.50, 140.44, 130.54, 130.52, 127.98, 127.95, 126.00, 125.91, 123.25, 123.13, 62.82, 49.85, 48.86, 47.20, 46.79, 33.92, 32.93, 31.27, 30.65, 30.09, 29.81, 29.64, 29.39, 27.30, 27.24, 20.84, 19.38.

**HRMS** (ESI)  $m/z$ :  $[\text{M} + \text{H}]^+$  Calcd for  $\text{C}_{17}\text{H}_{22}\text{ClNO}_3$ : 324.1361. Found: 324.1364.

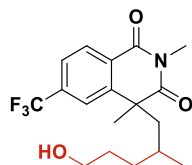

**4-(5-hydroxy-2-methylpentyl)-2,4-dimethyl-6-(trifluoromethyl)isoquinoline-1,3(2H,4H)-dione (3ia)**

The crude was purified by silica gel column chromatography with petroleum ether/ethyl acetate (6:1-4:1). Yellow oil, yield 71% (dr = 1:2).

$^1\text{H}$  NMR (400 MHz,  $\text{CDCl}_3$ )  $\delta$  8.42 – 8.34 (m, 1H), 7.71 – 7.61 (m, 2H), 3.51 – 3.41 (m, 2H), 3.39 (s, 3H), 2.44 (dd,  $J = 14.1, 5.1$  Hz, 0.63H), 2.31 (dd,  $J = 14.2, 8.8$  Hz, 0.37H), 2.04 (dd,  $J = 14.2, 3.5$  Hz, 0.36H), 1.82 (dd,  $J = 14.1, 6.0$  Hz, 0.64H), 1.62 (d,  $J = 4.3$  Hz, 3H), 1.49 (s, 1H), 1.45 – 1.28 (m, 2H), 1.16 – 0.94 (m, 3H), 0.59 (d,  $J = 6.4$  Hz, 1H), 0.43 (d,  $J = 6.2$  Hz, 2H).

$^{13}\text{C}$  NMR (101 MHz,  $\text{CDCl}_3$ )  $\delta$  176.05, 175.93, 163.31, 163.24, 144.76, 144.37, 135.68, 135.62, 135.46, 135.41, 135.25, 135.19, 135.03, 134.98, 129.77, 129.75, 127.62, 127.49, 124.30, 124.02, 124.00, 123.97, 123.03, 123.00, 122.97, 122.94, 122.91, 122.49, 62.71, 62.63, 49.94, 48.82, 47.32, 46.90, 33.90, 33.07, 31.12, 30.50, 30.12, 29.84, 29.55, 29.38, 27.39, 27.32, 20.75, 19.53.

$^{19}\text{F}$  NMR (376 MHz,  $\text{CDCl}_3$ )  $\delta$  -63.16, -63.17.

**HRMS** (ESI)  $m/z$ :  $[\text{M} + \text{H}]^+$  Calcd for  $\text{C}_{18}\text{H}_{22}\text{F}_3\text{NO}_3$ : 358.1625. Found: 358.1627.

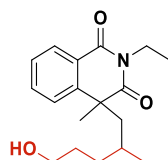

**2-ethyl-4-(5-hydroxy-2-methylpentyl)-4-methylisoquinoline-1,3(2H,4H)-dione (3ja)**

The crude was purified by silica gel column chromatography with petroleum ether/ethyl acetate (6:1-4:1). Yellow oil, yield 52% (dr = 1:1.8).

$^1\text{H}$  NMR (400 MHz,  $\text{CDCl}_3$ )  $\delta$  8.25 – 8.22 (m, 1H), 7.65 – 7.53 (m, 1H), 7.45 – 7.35 (m, 2H), 4.11 – 3.99 (m, 2H), 3.51 – 3.39 (m, 2H), 2.39 (dd,  $J = 14.0, 5.4$  Hz, 0.65H), 2.29 (dd,  $J = 14.0, 8.7$  Hz, 0.37H), 2.02 (dd,  $J = 14.0, 3.3$  Hz, 0.37H), 1.81 (dd,  $J = 14.0, 6.1$  Hz, 0.67H), 1.57 (d,  $J = 5.5$  Hz, 3H), 1.45 – 1.31 (m, 2H), 1.22 – 1.18 (m, 3H), 1.15 – 0.96 (m, 3H), 0.59 (d,  $J = 6.3$  Hz, 1.08H), 0.44 (d,  $J = 6.5$  Hz, 1.91H).

$^{13}\text{C}$  NMR (101 MHz,  $\text{CDCl}_3$ )  $\delta$  176.43, 176.30, 163.96, 163.91, 143.95, 143.58, 133.75, 133.68, 128.88, 128.86, 127.24, 127.20, 125.89, 125.76, 124.85, 124.72, 62.90, 49.71, 48.53, 46.95, 46.59, 35.67, 35.62, 33.88, 33.12, 31.73, 31.01, 30.20, 29.95, 29.79, 29.65, 20.68, 19.55, 13.10, 12.92.

**HRMS** (ESI)  $m/z$ :  $[\text{M} + \text{H}]^+$  Calcd for  $\text{C}_{18}\text{H}_{25}\text{NO}_3$ : 304.1907. Found: 304.1908.

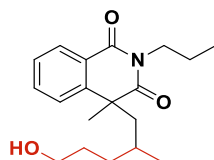

**4-(5-hydroxy-2-methylpentyl)-4-methyl-2-propylisoquinoline-1,3(2H,4H)-dione (3ka)**

The crude was purified by silica gel column chromatography with petroleum ether/ethyl acetate (6:1-4:1). Yellow oil, yield 43% (dr = 1:1.6).

<sup>1</sup>H NMR (400 MHz, CDCl<sub>3</sub>) δ 8.28 – 8.24 (m, 1H), 7.67 – 7.59 (m, 1H), 7.50 – 7.37 (m, 2H), 4.05 – 3.90 (m, 2H), 3.50 – 3.43 (m, 2H), 2.42 (dd, *J* = 14.0, 5.3 Hz, 0.65H), 2.31 (dd, *J* = 14.0, 8.4 Hz, 0.41H), 2.04 (dd, *J* = 14.1, 3.3 Hz, 0.41H), 1.84 (dd, *J* = 14.0, 6.3 Hz, 0.67H), 1.68 – 1.62 (m, 2H), 1.59 (d, *J* = 5.4 Hz, 3H), 1.56 (s, 1H), 1.46 – 1.29 (m, 2H), 1.18 – 1.01 (m, 3H), 0.97 (t, *J* = 7.4 Hz, 3H), 0.61 (d, *J* = 6.1 Hz, 1.19H), 0.45 (d, *J* = 6.4 Hz, 1.90H).

<sup>13</sup>C NMR (101 MHz, CDCl<sub>3</sub>) δ 176.61, 176.49, 164.18, 164.12, 143.98, 143.57, 133.73, 133.66, 128.95, 128.93, 127.24, 127.21, 125.89, 125.75, 124.82, 124.67, 62.92, 49.57, 48.43, 47.02, 46.65, 42.14, 42.05, 33.85, 33.18, 31.88, 31.21, 30.24, 29.97, 29.78, 29.63, 21.17, 21.03, 20.64, 19.56, 11.48.

HRMS (ESI) *m/z*: [M + H]<sup>+</sup> Calcd for C<sub>19</sub>H<sub>27</sub>NO<sub>3</sub>: 318.2064. Found: 318.2066.

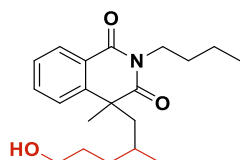

**2-butyl-4-(5-hydroxy-2-methylpentyl)-4-methylisoquinoline-1,3(2H,4H)-dione (3la)**

The crude was purified by silica gel column chromatography with petroleum ether/ethyl acetate (6:1-4:1). Yellow oil, yield 40% (dr = 1:1.6).

<sup>1</sup>H NMR (400 MHz, CDCl<sub>3</sub>) δ 8.25 – 8.21 (m, 1H), 7.67 – 7.56 (m, 1H), 7.46 – 7.33 (m, 2H), 4.03 – 3.92 (m, 2H), 3.41 – 3.47 (m, 2H), 2.39 (dd, *J* = 14.0, 5.4 Hz, 0.63H), 2.28 (dd, *J* = 14.0, 8.5 Hz, 0.39H), 2.01 (dd, *J* = 14.1, 3.3 Hz, 0.39H), 1.81 (dd, *J* = 14.0, 6.2 Hz, 0.65H), 1.63 – 1.58 (m, 2H), 1.56 (d, *J* = 5.5 Hz, 3H), 1.43 – 1.26 (m, 4H), 1.15 – 0.97 (m, 3H), 0.95 – 0.91 (m, 3H), 0.58 (d, *J* = 6.2 Hz, 1.15H), 0.42 (d, *J* = 6.4 Hz, 1.85H).

<sup>13</sup>C NMR (101 MHz, CDCl<sub>3</sub>) δ 176.60, 176.46, 164.16, 164.11, 143.97, 143.57, 133.72, 133.65, 128.92, 128.90, 127.24, 127.21, 125.88, 125.75, 124.83, 124.69, 62.90, 49.61, 48.44, 47.00, 46.64, 40.42, 40.34, 33.86, 33.17, 31.85, 31.17, 30.23, 29.97, 29.78, 29.64, 20.63, 20.34, 20.31, 19.54, 13.82, 13.80.

HRMS (ESI) *m/z*: [M + H]<sup>+</sup> Calcd for C<sub>20</sub>H<sub>29</sub>NO<sub>3</sub>: 332.2220. Found: 332.2221.

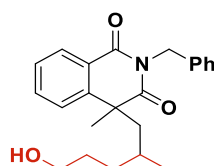

**2-benzyl-4-(5-hydroxy-2-methylpentyl)-4-methylisoquinoline-1,3(2H,4H)-dione (3ma)**

The crude was purified by silica gel column chromatography with petroleum ether/ethyl acetate (6:1-4:1). Yellow oil, yield 64% (dr = 1:1.4).

**<sup>1</sup>H NMR** (400 MHz, CDCl<sub>3</sub>) δ 8.28 – 8.25 (m, 1H), 7.64 – 7.60 (m, 1H), 7.48 – 7.43 (m, 2H), 7.42 – 7.35 (m, 2H), 7.31 – 7.25 (m, 2H), 7.25 – 7.20 (m, 1H), 5.27 – 5.11 (m, 2H), 3.41 – 3.25 (m, 2H), 2.38 (dd, *J* = 14.0, 5.6 Hz, 0.61H), 2.27 (dd, *J* = 14.0, 8.3 Hz, 0.42H), 2.00 (dd, *J* = 14.0, 3.7 Hz, 0.42H), 1.81 (dd, *J* = 14.0, 6.4 Hz, 0.61H), 1.57 (d, *J* = 6.8 Hz, 3H), 1.45 (s, 1H), 1.34 – 1.13 (m, 2H), 1.05 – 0.84 (m, 3H), 0.43 (d, *J* = 6.3 Hz, 1.24H), 0.38 (d, *J* = 6.5 Hz, 1.75H).

**<sup>13</sup>C NMR** (101 MHz, CDCl<sub>3</sub>) δ 176.55, 176.49, 164.24, 164.17, 143.95, 143.62, 137.23, 136.99, 133.91, 133.85, 129.14, 129.11, 128.38, 128.34, 127.46, 127.32, 127.29, 125.95, 125.79, 124.75, 124.62, 62.86, 62.77, 49.76, 48.73, 47.19, 46.89, 43.71, 43.68, 33.71, 33.01, 31.69, 31.17, 30.11, 29.85, 29.73, 29.53, 20.54, 19.48.

**HRMS** (ESI) *m/z*: [M + H]<sup>+</sup> Calcd for C<sub>23</sub>H<sub>27</sub>NO<sub>3</sub>: 366.2064. Found: 366.2066.

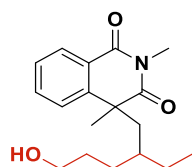

#### **4-(2-ethyl-5-hydroxypentyl)-2,4-dimethylisoquinoline-1,3(2H,4H)-dione (3ab)**

The crude was purified by silica gel column chromatography with petroleum ether/ethyl acetate (6:1-4:1). Yellow oil, yield 67% (dr = 1:1).

**<sup>1</sup>H NMR** (400 MHz, CDCl<sub>3</sub>) δ 8.25 – 8.22 (m, 1H), 7.65 – 7.60 (m, 1H), 7.45 – 7.37 (m, 2H), 3.47 – 3.41 (m, 1H), 3.37 (s, 3H), 3.35 – 3.31 (m, 1H), 2.31 – 2.22 (m, 1H), 1.91 – 1.81 (m, 1H), 1.62 (d, *J* = 3.3 Hz, 3H), 1.53 (s, 1H), 1.33 – 1.15 (m, 2H), 1.07 – 0.98 (m, 2H), 0.96 – 0.80 (m, 3H), 0.67 (t, *J* = 7.3 Hz, 1.49H), 0.58 (t, *J* = 7.1 Hz, 1.52H).

**<sup>13</sup>C NMR** (101 MHz, CDCl<sub>3</sub>) δ 177.02, 176.77, 164.51, 143.77, 143.69, 133.79, 128.80, 128.78, 127.30, 125.80, 125.78, 124.84, 124.76, 62.94, 62.85, 47.33, 46.98, 46.95, 35.72, 35.65, 30.30, 29.79, 29.45, 29.20, 28.76, 28.71, 27.21, 27.16, 26.42, 25.81, 10.42, 10.21.

**HRMS** (ESI) *m/z*: [M + H]<sup>+</sup> Calcd for C<sub>18</sub>H<sub>25</sub>NO<sub>3</sub>: 304.1907. Found: 304.1910.

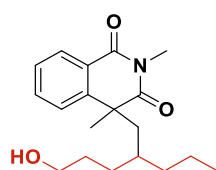

#### **4-(5-hydroxy-2-propylpentyl)-2,4-dimethylisoquinoline-1,3(2H,4H)-dione (3ac)**

The crude was purified by silica gel column chromatography with petroleum ether/ethyl acetate (6:1-4:1). Yellow oil, yield 59% (dr = 1:1.1).

**<sup>1</sup>H NMR** (400 MHz, CDCl<sub>3</sub>) δ 8.27 – 8.25 (m, 1H), 7.67 – 7.63 (m, 1H), 7.48 – 7.39 (m, 2H), 3.52 – 3.43 (m, 1H), 3.39 (s, 3H), 3.27 – 3.33 (m, 1H), 2.33 – 2.26 (m, 1H), 1.92 – 1.86 (m, 1H), 1.64 (d, *J* = 3.7 Hz, 3H), 1.59 (s, 1H), 1.50 – 1.20 (m, 3H), 1.09 – 1.01 (m, 2H), 1.00 – 0.82 (m, 4H), 0.73 (t, *J* = 7.1 Hz, 1.39H), 0.62 (t, *J* = 7.2 Hz, 1.57H).

**<sup>13</sup>C NMR** (101 MHz, CDCl<sub>3</sub>) δ 177.01, 176.80, 164.49, 143.77, 143.71, 133.77, 128.79, 128.78, 127.28, 125.80, 125.79, 124.86, 124.81, 62.95, 62.86, 47.84, 47.17, 46.97, 36.32, 35.79, 34.11, 34.02, 30.23, 29.97, 29.76, 29.26, 29.20, 28.79, 27.19, 27.14, 19.15, 18.99, 14.20, 14.03.

**HRMS** (ESI) *m/z*: [M + H]<sup>+</sup> Calcd for C<sub>19</sub>H<sub>27</sub>NO<sub>3</sub>: 318.2064. Found: 318.2065.

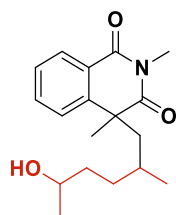

**4-(5-hydroxy-2-methylhexyl)-2,4-dimethylisoquinoline-1,3(2H,4H)-dione (3ad)**

The crude was purified by silica gel column chromatography with petroleum ether/ethyl acetate (6:1-4:1). Yellow oil, yield 56%.

**<sup>1</sup>H NMR** (400 MHz, CDCl<sub>3</sub>) δ 8.26 – 8.23 (m, 1H), 7.65 – 7.60 (m, 1H), 7.47 – 7.36 (m, 2H), 3.64 – 3.51 (m, 1H), 3.37 (d, *J* = 1.1 Hz, 3H), 2.42 – 2.36 (m, 0.60H), 2.26 (dd, *J* = 14.0, 8.5 Hz, 0.46H), 2.04 – 1.97 (m, 0.52H), 1.84 – 1.78 (m, 0.63H), 1.59 (d, *J* = 3.6 Hz, 3H), 1.50 (s, 1H), 1.37 – 1.27 (m, 1H), 1.25 – 1.15 (m, 2H), 1.12 – 0.97 (m, 5H), 0.58 (d, *J* = 6.1 Hz, 1.21H), 0.44 (dd, *J* = 6.4, 3.8 Hz, 1.67H).

**<sup>13</sup>C NMR** (101 MHz, CDCl<sub>3</sub>) δ 176.94, 176.81, 164.49, 164.43, 143.94, 143.61, 133.84, 133.78, 133.76, 128.88, 127.28, 127.26, 125.85, 125.84, 125.75, 124.75, 124.61, 68.17, 68.15, 68.02, 67.96, 49.88, 49.76, 49.10, 47.10, 46.72, 46.69, 36.20, 36.16, 35.87, 35.82, 33.96, 33.84, 32.82, 32.76, 31.38, 31.31, 30.87, 30.78, 30.35, 30.17, 30.09, 30.01, 27.23, 27.19, 27.16, 23.57, 23.45, 23.32, 20.81, 20.76, 19.48.

**HRMS** (ESI) *m/z*: [M + H]<sup>+</sup> Calcd for C<sub>18</sub>H<sub>25</sub>NO<sub>3</sub>: 304.1907. Found: 304.1909.

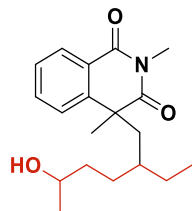

**4-(2-ethyl-5-hydroxyhexyl)-2,4-dimethylisoquinoline-1,3(2H,4H)-dione (3ae)**

The crude was purified by silica gel column chromatography with petroleum ether/ethyl acetate (6:1-4:1). Yellow oil, yield 59%.

**<sup>1</sup>H NMR** (400 MHz, CDCl<sub>3</sub>) δ 8.28 – 8.25 (m, 1H), 7.67 – 7.62 (m, 1H), 7.48 – 7.37 (m, 2H), 3.66 – 3.43 (m, 1H), 3.39 (d, *J* = 1.2 Hz, 3H), 2.36 – 2.24 (m, 1H), 1.93 – 1.83 (m, 1H), 1.64 (d, *J* = 4.2 Hz, 3H), 1.54 (s, 1H), 1.22 – 1.09 (m, 4H), 1.07 – 0.99 (m, 3H), 0.97 – 0.84 (m, 3H), 0.72 – 0.68 (m, 1.40H), 0.63 – 0.58 (m, 1.46H).

**<sup>13</sup>C NMR** (101 MHz, CDCl<sub>3</sub>) δ 177.09, 176.94, 176.76, 176.73, 164.50, 143.82, 143.78, 143.71, 143.70, 133.78, 133.76, 133.73, 128.81, 128.79, 127.28, 125.84, 125.78, 124.88, 124.84, 124.78, 68.22, 68.10, 68.03, 67.98, 47.48, 47.35, 47.02, 46.99, 46.96, 46.94, 46.71, 46.44, 35.96, 35.91, 35.81, 35.76, 35.68, 35.64, 35.20, 35.12, 30.45, 30.28, 29.86, 29.70, 29.42, 28.52, 28.50, 27.23, 27.20, 27.15, 26.43, 26.40, 25.85, 25.80, 23.62, 23.39, 23.34, 23.29, 10.46, 10.40, 10.23, 10.20.

**HRMS** (ESI) *m/z*: [M + H]<sup>+</sup> Calcd for C<sub>19</sub>H<sub>27</sub>NO<sub>3</sub>: 318.2064. Found: 318.2067.



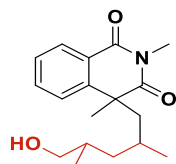

#### **4-(5-hydroxy-2,4-dimethylpentyl)-2,4-dimethylisoquinoline-1,3(2H,4H)-dione (3af)**

The crude was purified by silica gel column chromatography with petroleum ether/ethyl acetate (6:1-4:1). Yellow oil, yield 52%.

$^1\text{H NMR}$  (400 MHz,  $\text{CDCl}_3$ )  $\delta$  8.29 – 8.25 (m, 1H), 7.68 – 7.61 (m, 1H), 7.48 – 7.40 (m, 2H), 3.39 (d,  $J = 2.9$  Hz, 3H), 3.34 – 3.15 (m, 2H), 2.40 – 2.35 (m, 0.60H), 2.31 (dd,  $J = 14.0, 8.2$  Hz, 0.24H), 2.19 (dd,  $J = 14.0, 8.6$  Hz, 0.16H), 2.04 – 1.96 (m, 0.42H), 1.87 (dd,  $J = 13.9, 5.7$  Hz, 0.33H), 1.79 (dd,  $J = 13.9, 6.7$  Hz, 0.30H), 1.62 (t,  $J = 2.4$  Hz, 3H), 1.57 (s, 1H), 1.53 – 1.44 (m, 1H), 1.19 – 1.03 (m, 2H), 0.81 (d,  $J = 6.6$  Hz, 1H), 0.77 – 0.66 (m, 1H), 0.65 – 0.56 (m, 3H), 0.47 – 0.40 (m, 2H).

$^{13}\text{C NMR}$  (101 MHz,  $\text{CDCl}_3$ )  $\delta$  176.80, 176.76, 164.39, 144.17, 144.14, 133.31, 133.30, 128.95, 128.94, 127.28, 126.71, 126.66, 124.30, 68.64, 68.62, 53.46, 53.32, 45.80, 45.79, 39.98, 39.91, 34.09, 34.07, 33.69, 33.46, 33.38, 28.14, 28.05, 27.32, 27.25, 27.23, 23.57, 23.41.

**HRMS** (ESI)  $m/z$ :  $[\text{M} + \text{H}]^+$  Calcd for  $\text{C}_{18}\text{H}_{25}\text{NO}_3$ : 304.1907. Found: 304.1910.

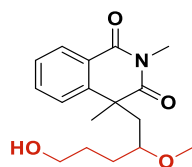

#### **4-(5-hydroxy-2-methoxypentyl)-2,4-dimethylisoquinoline-1,3(2H,4H)-dione (3ag)**

The crude was purified by silica gel column chromatography with petroleum ether/ethyl acetate (6:1-4:1). Yellow oil, yield 58%.

$^1\text{H NMR}$  (400 MHz,  $\text{CDCl}_3$ )  $\delta$  8.25 – 8.22 (m, 1H), 7.66 – 7.59 (m, 1H), 7.49 – 7.39 (m, 2H), 3.59 – 3.50 (m, 2H), 3.40 (d,  $J = 1.0$  Hz, 3H), 3.00 – 2.91 (m, 1H), 2.81 (d,  $J = 1.1$  Hz, 3H), 2.43 – 2.33 (m, 1H), 2.19 (dd,  $J = 14.5, 7.5$  Hz, 1H), 2.02 (s, 1H), 1.65 (d,  $J = 0.9$  Hz, 3H), 1.57 – 1.46 (m, 2H), 1.41 – 1.36 (m, 2H).

$^{13}\text{C NMR}$  (101 MHz,  $\text{CDCl}_3$ )  $\delta$  176.58, 164.60, 144.23, 133.54, 128.56, 127.07, 125.81, 124.28, 78.30, 62.70, 56.22, 47.57, 46.18, 29.98, 29.26, 27.72, 27.18.

**HRMS** (ESI)  $m/z$ :  $[\text{M} + \text{H}]^+$  Calcd for  $\text{C}_{17}\text{H}_{23}\text{NO}_4$ : 306.1700. Found: 306.1702.

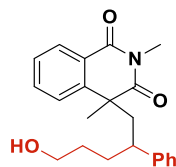

#### **4-(5-hydroxy-2-phenylpentyl)-2,4-dimethylisoquinoline-1,3(2H,4H)-dione (5ah)**

The crude was purified by silica gel column chromatography with petroleum ether/ethyl acetate (6:1-4:1). Yellow oil, yield 55%.

$^1\text{H NMR}$  (400 MHz,  $\text{CDCl}_3$ )  $\delta$  7.96 – 7.94 (m, 1H), 7.35 – 7.31 (m, 1H), 7.23 – 7.10 (m, 2H), 6.94 – 6.89 (m, 3H), 6.66 – 6.58 (m, 2H), 3.43 – 3.39 (m, 2H), 3.37 (s, 3H), 2.67 (dd,  $J = 13.7, 4.6$  Hz,

1H), 2.33 (dd,  $J = 13.6, 8.7$  Hz, 1H), 2.27 – 2.20 (m, 1H), 1.57 (s, 3H), 1.55 – 1.43 (m, 2H), 1.26 – 1.11 (m, 2H).

$^{13}\text{C}$  NMR (101 MHz,  $\text{CDCl}_3$ )  $\delta$  176.64, 164.32, 143.47, 143.35, 133.26, 128.49, 128.08, 127.28, 126.81, 125.93, 125.78, 124.32, 62.54, 49.49, 47.13, 43.31, 33.64, 30.77, 30.33, 27.05.

HRMS (ESI)  $m/z$ :  $[\text{M} + \text{H}]^+$  Calcd for  $\text{C}_{22}\text{H}_{25}\text{NO}_3$ : 352.1907. Found: 352.1909.

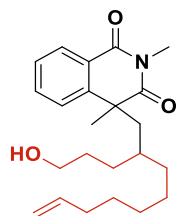

#### **4-(2-(3-hydroxypropyl)non-8-en-1-yl)-2,4-dimethylisoquinoline-1,3(2H,4H)-dione (3ai)**

The crude was purified by silica gel column chromatography with petroleum ether/ethyl acetate (6:1-4:1). Yellow oil, yield 51%.

$^1\text{H}$  NMR (400 MHz,  $\text{CDCl}_3$ )  $\delta$  8.24 – 8.22 (m, 1H), 7.64 – 7.59 (m, 1H), 7.44 – 7.39 (m, 2H), 5.85 – 5.68 (m, 1H), 4.99 – 4.84 (m, 2H), 3.47 – 3.40 (m, 1H), 3.36 (d,  $J = 1.5$  Hz, 3H), 3.34 – 3.30 (m, 1H), 2.33 – 2.18 (m, 1H), 2.01 – 1.96 (m, 1H), 1.93 – 1.83 (m, 2H), 1.61 (d,  $J = 1.4$  Hz, 3H), 1.36 – 1.18 (m, 6H), 1.07 – 0.83 (m, 7H).

$^{13}\text{C}$  NMR (101 MHz,  $\text{CDCl}_3$ )  $\delta$  176.96, 176.77, 164.46, 143.74, 143.70, 139.00, 133.75, 128.79, 127.29, 125.80, 124.84, 124.81, 114.23, 114.20, 62.92, 62.84, 47.69, 47.23, 46.98, 46.94, 34.33, 34.25, 33.94, 33.71, 33.67, 33.38, 30.19, 29.96, 29.88, 29.41, 29.33, 29.29, 29.21, 29.07, 28.83, 28.72, 27.19, 27.16, 25.85, 25.66.

HRMS (ESI)  $m/z$ :  $[\text{M} + \text{H}]^+$  Calcd for  $\text{C}_{23}\text{H}_{33}\text{NO}_3$ : 372.2533. Found: 372.2535.

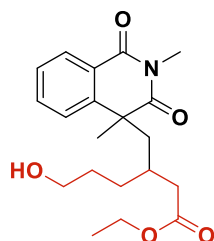

#### **ethyl 3-((2,4-dimethyl-1,3-dioxo-1,2,3,4-tetrahydroisoquinolin-4-yl)methyl)-6-hydroxyhexanoate (3aj)**

The crude was purified by silica gel column chromatography with petroleum ether/ethyl acetate (6:1-4:1). Yellow oil, yield 53%.

$^1\text{H}$  NMR (400 MHz,  $\text{CDCl}_3$ )  $\delta$  8.27 – 8.23 (m, 1H), 7.67 – 7.61 (m, 1H), 7.47 – 7.38 (m, 2H), 4.09 – 3.94 (m, 2H), 3.46 – 3.39 (m, 1H), 3.37 (d,  $J = 2.7$  Hz, 3H), 3.33 – 3.30 (m, 1H), 2.42 (dd,  $J = 14.2, 7.6$  Hz, 0.41H), 2.30 (dd,  $J = 14.2, 7.3$  Hz, 0.68H), 2.11 – 2.00 (m, 2H), 1.93 (dd,  $J = 8.4, 5.0$  Hz, 0.58H), 1.84 (dd,  $J = 15.6, 7.4$  Hz, 0.62H), 1.75 (s, 1H), 1.60 (d,  $J = 13.9$  Hz, 3H), 1.51 – 1.27 (m, 3H), 1.20 – 1.16 (m, 3H), 1.12 – 0.97 (m, 2H).

$^{13}\text{C}$  NMR (101 MHz,  $\text{CDCl}_3$ )  $\delta$  176.79, 176.53, 172.52, 172.44, 164.28, 164.26, 143.23, 143.01, 133.91, 128.99, 128.94, 127.52, 127.48, 126.07, 125.64, 124.92, 124.63, 62.41, 62.19, 60.38, 60.30, 47.17, 46.91, 46.79, 45.47, 39.00, 38.91, 31.75, 31.45, 31.38, 30.97, 29.81, 29.53, 28.97, 28.62, 27.25, 27.23, 14.16, 14.15.

**HRMS** (ESI)  $m/z$ :  $[M + H]^+$  Calcd for  $C_{20}H_{27}NO_5$ : 362.1962. Found: 362.1964.

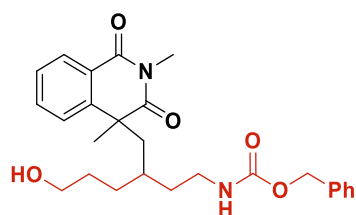

**benzyl 3-((2,4-dimethyl-1,3-dioxo-1,2,3,4-tetrahydroisoquinolin-4-yl)methyl)-6-hydroxyhexylcarbamate (3ak)**

The crude was purified by silica gel column chromatography with petroleum ether/ethyl acetate (6:1-4:1). Yellow oil, yield 53%.

**$^1H$  NMR** (400 MHz,  $CDCl_3$ )  $\delta$  8.24 – 8.21 (m, 1H), 7.64 – 7.55 (m, 1H), 7.42 – 7.37 (m, 2H), 7.36 – 7.28 (m, 5H), 5.08 – 4.99 (m, 2H), 4.79 (s, 0.53H), 4.45 (s, 0.42H), 3.41 (t,  $J = 6.3$  Hz, 1H), 3.35 (d,  $J = 3.0$  Hz, 3H), 3.29 – 3.17 (m, 1H), 3.12 – 2.77 (m, 2H), 2.35 – 2.24 (m, 1H), 1.91 (s, 1H), 1.90 – 1.83 (m, 1H), 1.60 (s, 3H), 1.33 – 1.10 (m, 4H), 1.07 – 0.79 (m, 3H).

**$^{13}C$  NMR** (101 MHz,  $CDCl_3$ )  $\delta$  177.01, 176.75, 164.29, 164.28, 156.42, 156.32, 143.47, 143.40, 136.64, 136.57, 133.97, 133.88, 128.90, 128.54, 128.50, 128.14, 128.12, 128.08, 128.06, 128.02, 127.46, 125.81, 125.77, 124.79, 124.67, 66.60, 62.33, 62.04, 47.02, 46.85, 46.80, 46.64, 38.17, 37.98, 34.39, 33.85, 31.52, 30.22, 30.13, 29.61, 29.16, 28.73, 28.44, 27.22.

**HRMS** (ESI)  $m/z$ :  $[M + H]^+$  Calcd for  $C_{26}H_{32}N_2O_5$ : 453.2384. Found: 453.2386.

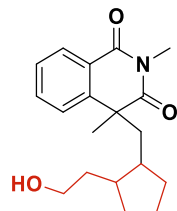

**4-((2-(2-hydroxyethyl)cyclopentyl)methyl)-2,4-dimethylisoquinoline-1,3(2H,4H)-dione (3al)**

The crude was purified by silica gel column chromatography with petroleum ether/ethyl acetate (6:1-4:1). Yellow oil, yield 63%.

**$^1H$  NMR** (400 MHz,  $CDCl_3$ )  $\delta$  8.25 – 8.22 (m, 1H), 7.67 – 7.57 (m, 1H), 7.46 – 7.37 (m, 2H), 3.66 – 3.45 (m, 2H), 3.37 (d,  $J = 5.0$  Hz, 3H), 2.25 – 2.51 (m, 0.54H), 2.24 – 2.16 (m, 0.46H), 1.82 – 1.74 (m, 1H), 1.71 – 1.64 (m, 2H), 1.62 (d,  $J = 3.4$  Hz, 3H), 1.40 – 1.18 (m, 4H), 1.07 – 0.87 (m, 2.39H), 1.06 – 0.71 (m, 3.11H), 0.51 – 0.41 (m, 0.63H).

**$^{13}C$  NMR** (101 MHz,  $CDCl_3$ )  $\delta$  176.89, 176.84, 164.61, 164.48, 144.13, 143.67, 133.94, 133.57, 128.81, 128.76, 127.34, 127.27, 126.15, 125.49, 124.86, 124.57, 61.95, 61.91, 49.26, 48.28, 47.78, 47.06, 43.49, 43.18, 43.02, 42.58, 37.22, 37.02, 32.81, 31.14, 31.11, 30.91, 30.32, 29.56, 27.28, 27.13, 23.96, 23.94.

**HRMS** (ESI)  $m/z$ :  $[M + H]^+$  Calcd for  $C_{19}H_{25}NO_3$ : 316.1907. Found: 316.1910.

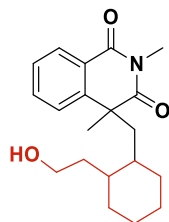

**4-((2-(2-hydroxyethyl)cyclohexyl)methyl)-2,4-dimethylisoquinoline-1,3(2H,4H)-dione (3am)**

The crude was purified by silica gel column chromatography with petroleum ether/ethyl acetate (6:1-4:1). Yellow oil, yield 58%.

<sup>1</sup>H NMR (400 MHz, CDCl<sub>3</sub>) δ 8.24 – 8.21 (m, 1H), 7.63 – 7.57 (m, 1H), 7.46 – 7.38 (m, 2H), 3.60 – 3.47 (m, 2H), 3.37 (s, 3H), 2.54 (dd, *J* = 14.0, 3.0 Hz, 0.69H), 2.31 (dd, *J* = 14.1, 4.2 Hz, 0.33H), 1.85 (dd, *J* = 14.1, 7.1 Hz, 0.60H), 1.76 (dd, *J* = 14.0, 7.2 Hz, 0.49H), 1.74 – 1.73 (m, 1H), 1.72 – 1.65 (m, 2H), 1.61 (d, *J* = 3.0 Hz, 3H), 1.48 – 1.34 (m, 3H), 1.21 – 1.01 (m, 3H), 0.96 – 0.62 (m, 4H).

<sup>13</sup>C NMR (101 MHz, CDCl<sub>3</sub>) δ 176.95, 176.72, 164.60, 144.22, 144.00, 133.74, 133.66, 128.84, 128.82, 127.32, 127.28, 125.96, 125.77, 124.50, 61.28, 60.79, 47.60, 47.38, 37.98, 37.54, 36.08, 32.45, 30.65, 30.39, 29.91, 29.22, 28.45, 27.18, 27.15, 24.77, 24.49.

HRMS (ESI) *m/z*: [M + H]<sup>+</sup> Calcd for C<sub>20</sub>H<sub>27</sub>NO<sub>3</sub>: 330.2064. Found: 330.2065.

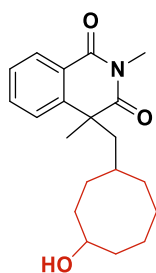

**4-((4-hydroxycyclooctyl)methyl)-2,4-dimethylisoquinoline-1,3(2H,4H)-dione (3an)**

The crude was purified by silica gel column chromatography with petroleum ether/ethyl acetate (6:1-4:1). Yellow oil, yield 69%.

<sup>1</sup>H NMR (400 MHz, CDCl<sub>3</sub>) δ 8.25 – 8.22 (m, 1H), 7.64 – 7.60 (m, 1H), 7.47 – 7.33 (m, 2H), 3.75 – 3.50 (m, 1H), 3.40 – 3.28 (m, 3H), 2.45 – 2.23 (m, 1H), 1.91 – 1.82 (m, 1H), 1.78 – 1.68 (m, 1H), 1.58 – 1.57 (m, 3H), 1.54 – 1.48 (m, 4H), 1.44 – 1.20 (m, 4H), 1.17 – 0.93 (m, 4H).

<sup>13</sup>C NMR (101 MHz, CDCl<sub>3</sub>) δ 176.79, 176.77, 164.45, 143.72, 143.67, 133.86, 133.82, 133.80, 133.78, 128.88, 128.86, 128.83, 127.31, 127.30, 127.28, 127.26, 125.76, 125.68, 125.66, 124.66, 72.21, 72.15, 71.40, 71.37, 50.09, 50.01, 49.10, 48.95, 46.99, 46.96, 46.92, 34.80, 34.76, 34.58, 34.55, 34.49, 34.36, 34.30, 33.01, 32.94, 32.14, 32.11, 31.39, 31.16, 31.13, 31.02, 30.94, 30.02, 29.70, 29.10, 28.88, 27.69, 27.26, 27.19, 27.16, 25.45, 25.34, 24.75, 24.65, 23.48, 23.22, 21.95, 21.91.

HRMS (ESI) *m/z*: [M + H]<sup>+</sup> Calcd for C<sub>20</sub>H<sub>27</sub>NO<sub>3</sub>: 330.2064. Found: 330.2067.

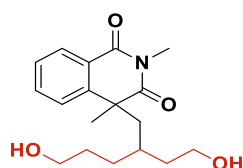

**4-(5-hydroxy-2-(2-hydroxyethyl)pentyl)-2,4-dimethylisoquinoline-1,3(2H,4H)-dione (3ao)**

The crude was purified by silica gel column chromatography with petroleum ether/ethyl acetate (6:1-4:1). Yellow oil, yield 43%.

<sup>1</sup>H NMR (400 MHz, CDCl<sub>3</sub>) δ 8.25 – 8.23 (m, 1H), 7.66 – 7.61 (m, 1H), 7.47 – 7.39 (m, 2H), 3.56 – 3.42 (m, 2H), 3.37 (d, *J* = 3.6 Hz, 3H), 3.34 – 3.22 (m, 2H), 2.37 – 2.30 (m, 1H), 1.94 – 1.85 (m, 1H), 1.74 (s, 2H), 1.62 (d, *J* = 2.8 Hz, 3H), 1.46 – 1.03 (m, 6H), 0.95 – 0.79 (m, 1H).

<sup>13</sup>C NMR (101 MHz, CDCl<sub>3</sub>) δ 177.20, 176.92, 164.41, 143.62, 143.53, 133.93, 133.85, 128.89, 127.45, 125.84, 125.72, 124.83, 124.76, 62.67, 62.51, 60.23, 59.98, 47.22, 47.15, 46.92, 37.04, 36.43, 31.30, 31.10, 30.28, 30.17, 30.06, 29.42, 28.85, 28.50, 27.25.

HRMS (ESI) *m/z*: [M + H]<sup>+</sup> Calcd for C<sub>18</sub>H<sub>25</sub>NO<sub>4</sub>: 320.1856. Found: 320.1858.

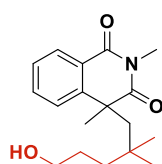

**4-(5-hydroxy-2,2-dimethylpentyl)-2,4-dimethylisoquinoline-1,3(2H,4H)-dione (3ap)**

The crude was purified by silica gel column chromatography with petroleum ether/ethyl acetate (6:1-4:1). Yellow oil, yield 71%.

<sup>1</sup>H NMR (400 MHz, CDCl<sub>3</sub>) δ 8.28 – 8.26 (m, 1H), 7.64 – 7.60 (m, 1H), 7.50 – 7.40 (m, 2H), 3.48 (t, *J* = 6.6 Hz, 2H), 3.39 (s, 3H), 2.53 (d, *J* = 14.4 Hz, 1H), 2.05 (d, *J* = 14.4 Hz, 1H), 1.60 (s, 3H), 1.52 (s, 1H), 1.52 – 1.41 (m, 2H), 1.03 – 0.85 (m, 2H), 0.54 (s, 3H), 0.43 (s, 3H).

<sup>13</sup>C NMR (101 MHz, CDCl<sub>3</sub>) δ 176.77, 164.40, 144.12, 133.32, 128.94, 127.29, 126.64, 124.29, 63.47, 53.20, 45.80, 39.87, 34.08, 33.67, 28.17, 27.29, 27.23, 27.17.

HRMS (ESI) *m/z*: [M + H]<sup>+</sup> Calcd for C<sub>18</sub>H<sub>25</sub>NO<sub>3</sub>: 304.1907. Found: 304.1910.

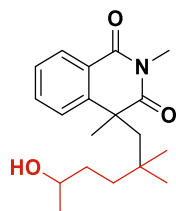

**4-(5-hydroxy-2,2-dimethylhexyl)-2,4-dimethylisoquinoline-1,3(2H,4H)-dione (3aq)**

The crude was purified by silica gel column chromatography with petroleum ether/ethyl acetate (6:1-4:1). Yellow oil, yield 70%.

<sup>1</sup>H NMR (400 MHz, CDCl<sub>3</sub>) δ 8.28 – 8.26 (m, 1H), 7.65 – 7.58 (m, 1H), 7.51 – 7.39 (m, 2H), 3.60 – 3.54 (m, 1H), 3.40 (d, *J* = 1.1 Hz, 3H), 2.53 (d, *J* = 14.4 Hz, 1H), 2.04 (dd, *J* = 14.4, 2.7 Hz, 1H), 1.61 (s, 3H), 1.50 (s, 1H), 1.36 – 1.26 (m, 2H), 1.12 (dd, *J* = 6.2, 1.2 Hz, 3H), 1.03 – 0.84 (m, 2H), 0.54 (d, *J* = 8.0 Hz, 3H), 0.42 (d, *J* = 6.6 Hz, 3H).

<sup>13</sup>C NMR (101 MHz, CDCl<sub>3</sub>) δ 176.80, 176.76, 164.39, 144.17, 144.14, 133.31, 133.30, 128.95, 128.94, 127.28, 126.71, 126.66, 124.30, 68.64, 68.62, 53.46, 53.32, 45.80, 45.79, 39.98, 39.91, 34.09, 34.07, 33.69, 33.46, 33.38, 28.14, 28.05, 27.32, 27.25, 27.23, 23.57, 23.41.

HRMS (ESI) *m/z*: [M + H]<sup>+</sup> Calcd for C<sub>19</sub>H<sub>27</sub>NO<sub>3</sub>: 318.2064. Found: 318.2065.

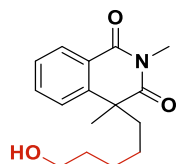

**4-(5-hydroxypentyl)-2,4-dimethylisoquinoline-1,3(2*H*,4*H*)-dione (3ar)**

The crude was purified by silica gel column chromatography with petroleum ether/ethyl acetate (6:1-4:1). Yellow oil, yield 41%.

**<sup>1</sup>H NMR** (400 MHz, CDCl<sub>3</sub>) δ 8.25 – 8.23 (m, 1H), 7.66 – 7.62 (m, 1H), 7.45 – 7.37 (m, 2H), 3.50 (t, *J* = 6.5 Hz, 2H), 3.38 (s, 3H), 2.32 – 2.25 (m, 1H), 1.90 – 1.80 (m, 1H), 1.61 (s, 3H), 1.42 (s, 1H), 1.42 – 1.26 (m, 2H), 1.28 – 1.15 (m, 2H), 0.98 – 0.70 (m, 2H).

**<sup>13</sup>C NMR** (101 MHz, CDCl<sub>3</sub>) δ 176.74, 164.54, 143.66, 134.06, 128.78, 127.29, 125.17, 124.91, 62.64, 47.73, 43.22, 32.25, 29.27, 27.12, 25.65, 24.92.

**HRMS** (ESI) *m/z*: [M + H]<sup>+</sup> Calcd for C<sub>16</sub>H<sub>21</sub>NO<sub>3</sub>: 276.1594. Found: 276.1595.

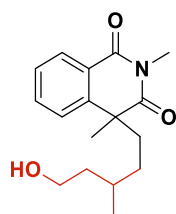

**4-(5-hydroxy-3-methylpentyl)-2,4-dimethylisoquinoline-1,3(2*H*,4*H*)-dione (3as)**

The crude was purified by silica gel column chromatography with petroleum ether/ethyl acetate (6:1-4:1). Yellow oil, yield 45%.

**<sup>1</sup>H NMR** (400 MHz, CDCl<sub>3</sub>) δ 8.24 – 8.22 (m, 1H), 7.69 – 7.57 (m, 1H), 7.48 – 7.36 (m, 2H), 3.59 – 3.46 (m, 2H), 3.37 (s, 3H), 2.39 – 2.20 (m, 1H), 1.95 – 1.77 (m, 1H), 1.60 (s, 3H), 1.54 (s, 1H), 1.49 – 1.34 (m, 2H), 1.28 – 1.13 (m, 1H), 0.94 – 0.85 (m, 1H), 0.79 – 0.41 (m, 4H).

**<sup>13</sup>C NMR** (101 MHz, CDCl<sub>3</sub>) δ 176.76, 176.74, 164.54, 143.66, 134.07, 134.06, 128.78, 127.29, 125.13, 125.11, 124.93, 60.73, 47.69, 40.42, 40.40, 39.28, 39.13, 32.09, 32.08, 29.51, 29.49, 29.38, 29.33, 27.12, 19.37, 19.31.

**HRMS** (ESI) *m/z*: [M + H]<sup>+</sup> Calcd for C<sub>17</sub>H<sub>23</sub>NO<sub>3</sub>: 290.1751. Found: 290.1753.

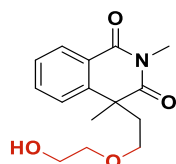

**4-(2-(2-hydroxyethoxy)ethyl)-2,4-dimethylisoquinoline-1,3(2*H*,4*H*)-dione (3at)**

The crude was purified by silica gel column chromatography with petroleum ether/ethyl acetate (6:1-4:1). Yellow oil, yield 44%.

**<sup>1</sup>H NMR** (400 MHz, CDCl<sub>3</sub>) δ 8.27 – 8.25 (m, 1H), 7.66 – 7.62 (m, 1H), 7.49 – 7.38 (m, 2H), 3.47 (t, *J* = 4.5 Hz, 2H), 3.37 (s, 3H), 3.28 – 3.17 (m, 1H), 3.15 – 3.11 (m, 1H), 3.00 – 2.93 (m, 1H), 2.83 – 2.76 (m, 1H), 2.09 – 2.03 (m, 1H), 1.89 (s, 1H), 1.65 (s, 3H).

$^{13}\text{C}$  NMR (101 MHz,  $\text{CDCl}_3$ )  $\delta$  176.89, 164.58, 142.82, 128.88, 127.43, 125.40, 125.07, 72.24, 67.49, 61.65, 45.50, 42.47, 29.68, 27.21.

HRMS (ESI)  $m/z$ :  $[\text{M} + \text{H}]^+$  Calcd for  $\text{C}_{15}\text{H}_{19}\text{NO}_4$ : 278.1387. Found: 278.1390.

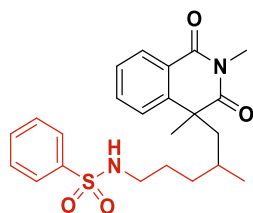

**N-(5-(2,4-dimethyl-1,3-dioxo-1,2,3,4-tetrahydroisoquinolin-4-yl)-4-methylpentyl)benzenesulfonamide (5aa)**

The crude was purified by silica gel column chromatography with petroleum ether/ethyl acetate (6:1-4:1). Yellow oil, yield 64% (dr = 1:1.5).

$^1\text{H}$  NMR (400 MHz,  $\text{CDCl}_3$ )  $\delta$  8.24 – 8.22 (m, 1H), 7.85 – 7.80 (m, 2H), 7.64 – 7.59 (m, 1H), 7.58 – 7.54 (m, 1H), 7.51 – 7.48 (m, 2H), 7.43 – 7.31 (m, 2H), 4.67 – 4.62 (m, 1H), 3.34 (d,  $J$  = 12.0 Hz, 3H), 2.84 – 2.69 (m, 2H), 2.31 (dd,  $J$  = 14.1, 5.4 Hz, 0.62H), 2.19 (dd,  $J$  = 14.0, 8.6 Hz, 0.41H), 1.92 (dd,  $J$  = 14.1, 3.3 Hz, 0.40H), 1.74 (dd,  $J$  = 14.0, 6.3 Hz, 0.60H), 1.55 (d,  $J$  = 4.3 Hz, 3H), 1.38 – 1.18 (m, 2H), 1.09 – 0.84 (m, 3H), 0.49 (d,  $J$  = 6.2 Hz, 1.21H), 0.35 (d,  $J$  = 6.5 Hz, 1.83H).

$^{13}\text{C}$  NMR (101 MHz,  $\text{CDCl}_3$ )  $\delta$  176.86, 176.78, 164.40, 164.37, 143.78, 143.38, 139.99, 139.94, 134.00, 133.84, 132.61, 132.57, 129.11, 128.92, 128.87, 127.36, 127.34, 127.03, 126.98, 125.83, 125.72, 124.65, 124.49, 49.16, 48.66, 47.12, 46.61, 43.31, 43.18, 34.59, 33.81, 31.36, 30.91, 29.90, 29.55, 27.24, 27.20, 26.65, 26.12, 20.67, 19.29.

HRMS (ESI)  $m/z$ :  $[\text{M} + \text{H}]^+$  Calcd for  $\text{C}_{23}\text{H}_{28}\text{N}_2\text{O}_4\text{S}$ : 429.1843. Found: 429.1847.

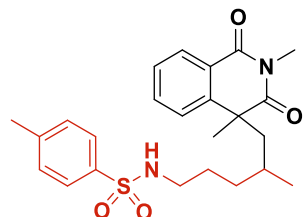

**N-(5-(2,4-dimethyl-1,3-dioxo-1,2,3,4-tetrahydroisoquinolin-4-yl)-4-methylpentyl)-4-methylbenzenesulfonamide (5ab)**

The crude was purified by silica gel column chromatography with petroleum ether/ethyl acetate (6:1-4:1). Yellow oil, yield 69% (dr = 1:1.5).

$^1\text{H}$  NMR (400 MHz,  $\text{CDCl}_3$ )  $\delta$  8.24 – 8.22 (m, 1H), 7.73 – 7.67 (m, 2H), 7.63 – 7.60 (m, 1H), 7.45 – 7.32 (m, 2H), 7.30 – 7.28 (m, 2H), 4.53 – 4.48 (m, 1H), 3.35 (d,  $J$  = 12.0 Hz, 3H), 2.83 – 2.67 (m, 2H), 2.41 (s, 3H), 2.31 (dd,  $J$  = 14.0, 5.4 Hz, 0.62H), 2.20 (dd,  $J$  = 14.1, 8.6 Hz, 0.40H), 1.92 (dd,  $J$  = 14.1, 3.3 Hz, 0.41H), 1.74 (dd,  $J$  = 14.1, 6.4 Hz, 0.62H), 1.56 (d,  $J$  = 4.2 Hz, 3H), 1.38 – 1.19 (m, 2H), 1.08 – 0.88 (m, 3H), 0.50 (d,  $J$  = 6.2 Hz, 1.18H), 0.35 (d,  $J$  = 6.6 Hz, 1.82H).

$^{13}\text{C}$  NMR (101 MHz,  $\text{CDCl}_3$ )  $\delta$  176.86, 176.77, 164.40, 164.37, 143.79, 143.39, 143.32, 136.99, 136.93, 133.99, 133.83, 129.70, 128.92, 128.88, 127.35, 127.10, 127.05, 125.83, 125.71, 124.50, 49.18, 48.66, 47.12, 46.61, 43.27, 43.15, 34.62, 33.83, 31.38, 30.90, 29.92, 29.56, 27.23, 27.19, 26.64, 26.12, 21.53, 20.67, 19.28.

**HRMS** (ESI)  $m/z$ :  $[M + H]^+$  Calcd for  $C_{24}H_{30}N_2O_4S$ : 443.1999. Found: 443.2001.

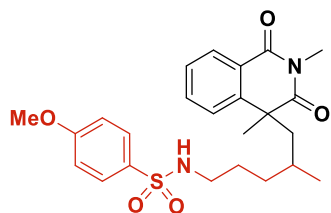

**N-(5-(2,4-dimethyl-1,3-dioxo-1,2,3,4-tetrahydroisoquinolin-4-yl)-4-methylpentyl)-4-methoxybenzenesulfonamide (5ac)**

The crude was purified by silica gel column chromatography with petroleum ether/ethyl acetate (6:1-4:1). Yellow oil, yield 72% (dr = 1:1.4).

**$^1H$  NMR** (400 MHz,  $CDCl_3$ )  $\delta$  8.26 – 8.23 (m, 1H), 7.79 – 7.72 (m, 2H), 7.65 – 7.58 (m, 1H), 7.47 – 7.32 (m, 2H), 6.99 – 6.95 (m, 2H), 4.38 – 4.28 (m, 1H), 3.87 (s, 3H), 3.35 (d,  $J = 6.8$  Hz, 3H), 2.79 – 2.68 (m, 2H), 2.32 (dd,  $J = 14.0, 5.3$  Hz, 0.57H), 2.21 (dd,  $J = 14.0, 8.4$  Hz, 0.43H), 1.93 (dd,  $J = 13.8, 3.1$  Hz, 0.42H), 1.75 (dd,  $J = 14.0, 6.2$  Hz, 0.63H), 1.57 (d,  $J = 1.8$  Hz, 3H), 1.38 – 1.19 (m, 2H), 1.08 – 0.87 (m, 3H), 0.51 (d,  $J = 6.0$  Hz, 1.22H), 0.36 (d,  $J = 6.4$  Hz, 1.72H).

**$^{13}C$  NMR** (101 MHz,  $CDCl_3$ )  $\delta$  176.87, 176.76, 164.40, 164.37, 162.83, 162.81, 143.80, 143.39, 134.00, 133.83, 131.55, 131.52, 129.20, 129.16, 128.91, 128.87, 127.35, 125.84, 125.72, 124.66, 124.50, 114.23, 55.65, 55.63, 49.21, 48.65, 47.12, 46.61, 43.24, 43.11, 34.64, 33.87, 31.38, 30.88, 29.92, 29.57, 27.23, 27.20, 26.60, 26.11, 20.68, 19.29.

**HRMS** (ESI)  $m/z$ :  $[M + H]^+$  Calcd for  $C_{24}H_{30}N_2O_5S$ : 459.1948. Found: 459.1950.

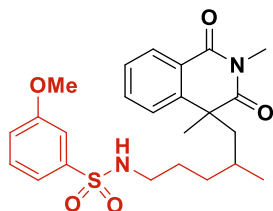

**N-(5-(2,4-dimethyl-1,3-dioxo-1,2,3,4-tetrahydroisoquinolin-4-yl)-4-methylpentyl)-3-methoxybenzenesulfonamide (5ad)**

The crude was purified by silica gel column chromatography with petroleum ether/ethyl acetate (6:1-4:1). Yellow oil, yield 74% (dr = 1:1.4).

**$^1H$  NMR** (400 MHz,  $CDCl_3$ )  $\delta$  8.23 – 8.21 (m, 1H), 7.63 – 7.59 (m, 1H), 7.46 – 7.37 (m, 4H), 7.35 – 7.32 (m, 1H), 7.09 – 7.06 (m, 1H), 4.73 – 4.69 (m, 1H), 3.83 (d,  $J = 2.3$  Hz, 3H), 3.34 (d,  $J = 7.1$  Hz, 3H), 2.84 – 2.65 (m, 2H), 2.30 (dd,  $J = 14.0, 5.1$  Hz, 0.60H), 2.19 (dd,  $J = 14.0, 8.5$  Hz, 0.40H), 1.92 (dd,  $J = 13.9, 2.9$  Hz, 0.45H), 1.74 (dd,  $J = 14.0, 6.2$  Hz, 0.63H), 1.55 (d,  $J = 3.2$  Hz, 3H), 1.39 – 1.18 (m, 2H), 1.11 – 0.85 (m, 3H), 0.49 (d,  $J = 6.0$  Hz, 1.26H), 0.34 (d,  $J = 6.4$  Hz, 1.74H).

**$^{13}C$  NMR** (101 MHz,  $CDCl_3$ )  $\delta$  176.87, 176.78, 164.40, 164.37, 159.94, 143.78, 143.37, 141.10, 141.05, 134.00, 133.84, 130.18, 130.16, 128.92, 128.87, 127.36, 127.34, 125.83, 125.71, 124.65, 124.49, 119.18, 119.11, 118.96, 118.86, 111.82, 111.72, 55.67, 49.17, 48.65, 47.12, 46.61, 43.36, 43.24, 34.62, 33.85, 31.36, 30.89, 29.92, 29.56, 27.23, 27.19, 26.65, 26.13, 20.67, 19.28.

**HRMS** (ESI)  $m/z$ :  $[M + H]^+$  Calcd for  $C_{24}H_{30}N_2O_5S$ : 459.1948. Found: 459.1951.



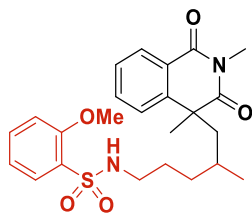

**N-(5-(2,4-dimethyl-1,3-dioxo-1,2,3,4-tetrahydroisoquinolin-4-yl)-4-methylpentyl)-2-methoxybenzenesulfonamide (5ae)**

The crude was purified by silica gel column chromatography with petroleum ether/ethyl acetate (6:1-4:1). Yellow oil, yield 71% (dr = 1:2.6).

<sup>1</sup>H NMR (400 MHz, CDCl<sub>3</sub>) δ 8.23 – 8.21 (m, 1H), 7.88 – 7.85 (m, 1H), 7.66 – 7.58 (m, 1H), 7.56 – 7.51 (m, 1H), 7.44 – 7.31 (m, 2H), 7.10 – 7.00 (m, 2H), 4.85 – 4.78 (m, 1H), 3.97 (d, *J* = 14.3 Hz, 3H), 3.33 (d, *J* = 16.3 Hz, 3H), 2.73 – 2.64 (m, 2H), 2.30 (dd, *J* = 14.0, 5.1 Hz, 0.70H), 2.19 (dd, *J* = 14.0, 8.6 Hz, 0.28H), 1.92 (dd, *J* = 14.0, 2.9 Hz, 0.30H), 1.74 (dd, *J* = 14.0, 6.4 Hz, 0.78H), 1.56 (d, *J* = 3.4 Hz, 3H), 1.38 – 1.17 (m, 2H), 1.08 – 0.83 (m, 3H), 0.49 (d, *J* = 6.1 Hz, 0.84H), 0.34 (d, *J* = 6.4 Hz, 2.15H).

<sup>13</sup>C NMR (101 MHz, CDCl<sub>3</sub>) δ 176.87, 176.68, 164.39, 164.36, 156.09, 156.06, 143.78, 143.34, 134.48, 134.44, 134.00, 133.81, 130.46, 130.37, 128.90, 128.87, 127.38, 127.35, 127.33, 127.24, 125.84, 125.70, 124.65, 124.51, 120.77, 120.73, 112.11, 112.08, 56.39, 56.37, 49.34, 48.55, 47.10, 46.59, 43.63, 43.44, 34.71, 33.99, 31.48, 30.86, 30.01, 29.58, 27.23, 27.15, 26.62, 26.15, 20.67, 19.27.

HRMS (ESI) *m/z*: [M + H]<sup>+</sup> Calcd for C<sub>24</sub>H<sub>30</sub>N<sub>2</sub>O<sub>5</sub>S: 459.1948. Found: 459.1951.

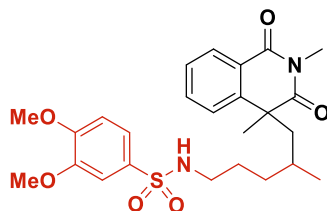

**N-(5-(2,4-dimethyl-1,3-dioxo-1,2,3,4-tetrahydroisoquinolin-4-yl)-4-methylpentyl)-3,4-dimethoxybenzenesulfonamide (5af)**

The crude was purified by silica gel column chromatography with petroleum ether/ethyl acetate (6:1-4:1). Yellow oil, yield 76% (dr = 1:1.3).

<sup>1</sup>H NMR (400 MHz, CDCl<sub>3</sub>) δ 8.25 – 8.22 (m, 1H), 7.64 – 7.59 (m, 1H), 7.45 – 7.29 (m, 4H), 6.94 – 6.91 (m, 1H), 4.52 – 4.46 (m, 1H), 3.93 – 3.90 (m, 6H), 3.35 (d, *J* = 5.6 Hz, 3H), 2.80 – 2.69 (m, 2H), 2.31 (dd, *J* = 14.0, 5.2 Hz, 0.45H), 2.21 (dd, *J* = 14.0, 8.3 Hz, 0.58H), 1.92 (dd, *J* = 13.9, 2.9 Hz, 0.58H), 1.75 (dd, *J* = 14.0, 6.2 Hz, 0.54H), 1.56 (d, *J* = 2.1 Hz, 3H), 1.40 – 1.18 (m, 2H), 1.07 – 0.81 (m, 3H), 0.51 (d, *J* = 5.9 Hz, 1.69H), 0.36 (d, *J* = 6.4 Hz, 1.35H).

<sup>13</sup>C NMR (101 MHz, CDCl<sub>3</sub>) δ 176.84, 176.76, 164.39, 164.35, 152.50, 152.45, 149.15, 143.77, 143.38, 133.97, 133.83, 131.54, 128.91, 128.88, 127.36, 127.33, 125.82, 125.69, 124.67, 124.50, 121.00, 120.96, 110.52, 109.56, 109.54, 56.26, 56.20, 56.19, 49.19, 48.69, 47.11, 46.60, 43.30, 43.19, 34.68, 33.88, 31.36, 30.91, 29.94, 29.58, 27.23, 27.19, 26.62, 26.11, 20.70, 19.27.

HRMS (ESI) *m/z*: [M + H]<sup>+</sup> Calcd for C<sub>25</sub>H<sub>32</sub>N<sub>2</sub>O<sub>6</sub>S: 489.2054. Found: 489.2057.

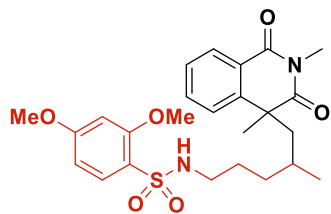

**N-(5-(2,4-dimethyl-1,3-dioxo-1,2,3,4-tetrahydroisoquinolin-4-yl)-4-methylpentyl)-2,4-dimethoxybenzenesulfonamide (5ag)**

The crude was purified by silica gel column chromatography with petroleum ether/ethyl acetate (6:1-4:1). Yellow oil, yield 77% (dr = 1:1.5).

$^1\text{H NMR}$  (400 MHz,  $\text{CDCl}_3$ )  $\delta$  8.23 – 8.21 (m, 1H), 7.81 – 7.74 (m, 1H), 7.63 – 7.59 (m, 1H), 7.45 – 7.30 (m, 2H), 6.57 – 6.49 (m, 2H), 4.76 – 4.71 (m, 1H), 3.92 (d,  $J = 14.5$  Hz, 3H), 3.85 (d,  $J = 1.1$  Hz, 3H), 3.33 (d,  $J = 14.6$  Hz, 3H), 2.69 – 2.59 (m, 2H), 2.30 (dd,  $J = 13.9, 5.0$  Hz, 0.63H), 2.19 (dd,  $J = 13.9, 8.7$  Hz, 0.42H), 1.93 (dd,  $J = 14.0, 2.9$  Hz, 0.49H), 1.74 (dd,  $J = 14.0, 6.4$  Hz, 0.76H), 1.55 (d,  $J = 3.7$  Hz, 3H), 1.37 – 1.17 (m, 2H), 1.07 – 0.86 (m, 3H), 0.49 (d,  $J = 6.0$  Hz, 1.25H), 0.34 (d,  $J = 6.4$  Hz, 1.88H).

$^{13}\text{C NMR}$  (101 MHz,  $\text{CDCl}_3$ )  $\delta$  176.89, 176.67, 164.72, 164.69, 164.40, 164.37, 157.56, 157.52, 143.80, 143.34, 134.01, 133.81, 132.16, 132.09, 128.89, 128.86, 127.34, 127.32, 125.85, 125.71, 124.64, 124.50, 119.55, 119.44, 104.41, 104.37, 99.50, 56.32, 55.76, 55.74, 49.39, 48.53, 47.10, 46.58, 43.59, 43.40, 34.75, 34.06, 31.49, 30.83, 30.03, 29.59, 27.22, 27.14, 26.55, 26.12, 20.68, 19.27.

**HRMS** (ESI)  $m/z$ :  $[\text{M} + \text{H}]^+$  Calcd for  $\text{C}_{25}\text{H}_{32}\text{N}_2\text{O}_6\text{S}$ : 489.2054. Found: 489.2056.

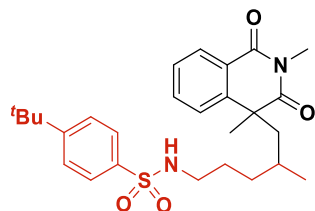

**4-(tert-butyl)-N-(5-(2,4-dimethyl-1,3-dioxo-1,2,3,4-tetrahydroisoquinolin-4-yl)-4-methylpentyl)benzenesulfonamide (5ah)**

The crude was purified by silica gel column chromatography with petroleum ether/ethyl acetate (6:1-4:1). Yellow oil, yield 70% (dr = 1:1).

$^1\text{H NMR}$  (400 MHz,  $\text{CDCl}_3$ )  $\delta$  8.24 – 8.22 (m, 1H), 7.76 – 7.71 (m, 2H), 7.63 – 7.59 (m, 1H), 7.51 – 7.48 (m, 2H), 7.44 – 7.32 (m, 2H), 4.69 – 4.56 (m, 1H), 3.35 – 3.32 (m, 3H), 2.82 – 2.68 (m, 2H), 2.32 (dd,  $J = 14.4, 4.7$  Hz, 0.52H), 2.20 (dd,  $J = 14.1, 7.9$  Hz, 0.53H), 1.98 – 1.91 (m, 0.58H), 1.77 – 1.71 (m, 0.64H), 1.55 (t,  $J = 2.5$  Hz, 3H), 1.36 – 1.28 (m, 9H), 1.27 – 1.19 (m, 2H), 1.08 – 0.84 (m, 3H), 0.48 (d,  $J = 5.5$  Hz, 1.59H), 0.33 (dt,  $J = 6.6, 1.8$  Hz, 1.42H).

$^{13}\text{C NMR}$  (101 MHz,  $\text{CDCl}_3$ )  $\delta$  176.86, 176.77, 164.39, 164.36, 156.36, 156.28, 143.79, 143.39, 136.90, 136.85, 134.01, 133.83, 128.92, 128.87, 127.34, 126.91, 126.86, 126.07, 125.83, 125.74, 124.65, 124.50, 49.21, 48.65, 47.12, 46.62, 43.30, 43.16, 35.14, 34.60, 33.83, 31.40, 31.11, 30.89, 29.92, 29.57, 27.23, 27.20, 26.66, 26.14, 20.67, 19.28.

**HRMS** (ESI)  $m/z$ :  $[\text{M} + \text{H}]^+$  Calcd for  $\text{C}_{27}\text{H}_{36}\text{N}_2\text{O}_4\text{S}$ : 485.2469. Found: 485.2471.

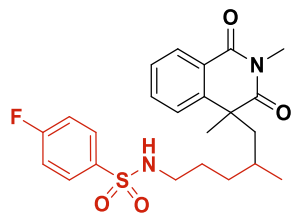

**N-(5-(2,4-dimethyl-1,3-dioxo-1,2,3,4-tetrahydroisoquinolin-4-yl)-4-methylpentyl)-4-fluorobenzenesulfonamide (5ai)**

The crude was purified by silica gel column chromatography with petroleum ether/ethyl acetate (6:1-4:1). Yellow oil, yield 46% (dr = 1:1).

$^1\text{H NMR}$  (400 MHz,  $\text{CDCl}_3$ )  $\delta$  8.25 – 8.23 (m, 1H), 7.88 – 7.79 (m, 2H), 7.64 – 7.61 (m, 1H), 7.45 – 7.32 (m, 2H), 7.19 – 7.16 (m, 2H), 4.59 (t,  $J = 6.1$  Hz, 0.48H), 4.51 (t,  $J = 6.2$  Hz, 0.48H), 3.36 (d,  $J = 7.4$  Hz, 3H), 2.85 – 2.68 (m, 2H), 2.32 (dd,  $J = 14.1, 5.4$  Hz, 0.49H), 2.21 (dd,  $J = 14.0, 8.5$  Hz, 0.50H), 1.93 (dd,  $J = 14.1, 3.4$  Hz, 0.51H), 1.75 (dd,  $J = 14.0, 6.2$  Hz, 0.50H), 1.57 (d,  $J = 1.5$  Hz, 3H), 1.40 – 1.17 (m, 2H), 1.10 – 0.87 (m, 3H), 0.52 (d,  $J = 6.3$  Hz, 1.50H), 0.37 (d,  $J = 6.5$  Hz, 1.48H).

$^{13}\text{C NMR}$  (101 MHz,  $\text{CDCl}_3$ )  $\delta$  176.82, 166.29, 164.39, 164.36, 163.76, 143.73, 143.39, 136.09, 136.06, 133.97, 133.87, 129.82, 129.77, 129.73, 129.68, 128.94, 128.92, 127.39, 127.36, 125.82, 125.68, 124.69, 124.50, 116.45, 116.43, 116.23, 116.21, 49.04, 48.76, 47.12, 46.62, 43.27, 43.16, 34.58, 33.73, 31.31, 31.00, 29.89, 29.56, 27.25, 27.22, 26.67, 26.08, 20.70, 19.29.

$^{19}\text{F NMR}$  (565 MHz,  $\text{CDCl}_3$ )  $\delta$  -105.37, -105.57.

**HRMS** (ESI)  $m/z$ :  $[\text{M} + \text{H}]^+$  Calcd for  $\text{C}_{23}\text{H}_{27}\text{FN}_2\text{O}_4\text{S}$ : 447.1748. Found: 447.1750.

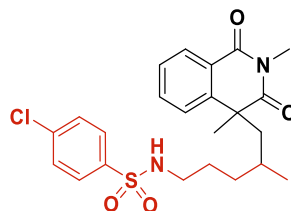

**4-chloro-N-(5-(2,4-dimethyl-1,3-dioxo-1,2,3,4-tetrahydroisoquinolin-4-yl)-4-methylpentyl)benzenesulfonamide (5aj)**

The crude was purified by silica gel column chromatography with petroleum ether/ethyl acetate (6:1-4:1). Yellow oil, yield 54% (dr = 1:2).

$^1\text{H NMR}$  (400 MHz,  $\text{CDCl}_3$ )  $\delta$  8.24 – 8.22 (m, 1H), 7.79 – 7.73 (m, 2H), 7.64 – 7.60 (m, 1H), 7.52 – 7.31 (m, 4H), 7.47 – 7.63 (m, 1H), 3.36 – 3.34 (m, 3H), 2.83 – 2.70 (m, 2H), 2.31 (dd,  $J = 14.2, 5.0$  Hz, 0.66H), 2.21 (dd,  $J = 14.3, 7.7$  Hz, 0.35H), 1.95 – 1.88 (m, 0.41H), 1.77 – 1.72 (m, 0.67H), 1.56 (s, 3H), 1.42 – 1.18 (m, 2H), 1.09 – 0.86 (m, 3H), 0.51 (d,  $J = 5.4$  Hz, 1.00H), 0.36 (d,  $J = 6.3$  Hz, 1.97H).

$^{13}\text{C NMR}$  (101 MHz,  $\text{CDCl}_3$ )  $\delta$  176.83, 164.40, 164.36, 143.74, 143.39, 139.09, 139.02, 138.54, 133.98, 133.87, 129.40, 128.94, 128.91, 128.54, 128.49, 127.39, 127.36, 125.82, 125.68, 124.67, 124.48, 49.04, 48.72, 47.12, 46.61, 43.28, 43.17, 34.56, 33.73, 31.32, 31.00, 29.88, 29.54, 27.25, 27.23, 26.65, 26.08, 20.70, 19.29.

**HRMS** (ESI)  $m/z$ :  $[\text{M} + \text{H}]^+$  Calcd for  $\text{C}_{23}\text{H}_{27}\text{ClN}_2\text{O}_4\text{S}$ : 463.1453. Found: 463.1455.

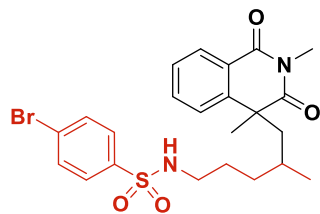

**4-bromo-N-(5-(2,4-dimethyl-1,3-dioxo-1,2,3,4-tetrahydroisoquinolin-4-yl)-4-methylpentyl)benzenesulfonamide (5ak)**

The crude was purified by silica gel column chromatography with petroleum ether/ethyl acetate (6:1-4:1). Yellow oil, yield 52% (dr = 1:1.7).

**<sup>1</sup>H NMR** (400 MHz, CDCl<sub>3</sub>) δ 8.25 – 8.22 (m, 1H), 7.74 – 7.59 (m, 5H), 7.46 – 7.32 (m, 2H), 4.70 (t, *J* = 6.1 Hz, 0.62H), 4.72 – 4.59 (m, 0.37H), 3.36 (d, *J* = 5.3 Hz, 3H), 2.82 – 2.67 (m, 2H), 2.32 (dd, *J* = 14.0, 5.3 Hz, 0.63H), 2.21 (dd, *J* = 14.1, 8.4 Hz, 0.40H), 1.92 (dd, *J* = 13.9, 3.1 Hz, 0.42H), 1.75 (dd, *J* = 14.0, 6.1 Hz, 0.61H), 1.57 (d, *J* = 1.2 Hz, 3H), 1.39 – 1.19 (m, 2H), 1.09 – 0.86 (m, 3H), 0.51 (d, *J* = 6.0 Hz, 1.06H), 0.36 (d, *J* = 6.4 Hz, 1.77H).

**<sup>13</sup>C NMR** (101 MHz, CDCl<sub>3</sub>) δ 176.84, 164.40, 164.36, 143.73, 143.39, 139.07, 133.98, 133.87, 132.40, 132.39, 128.95, 128.93, 128.64, 128.58, 127.56, 127.50, 127.40, 127.38, 125.82, 125.67, 124.69, 124.49, 49.00, 48.75, 47.13, 46.62, 43.28, 43.16, 34.55, 33.70, 31.31, 31.02, 29.87, 29.54, 27.26, 27.24, 26.67, 26.07, 20.71, 19.30.

**HRMS** (ESI) *m/z*: [M + H]<sup>+</sup> Calcd for C<sub>23</sub>H<sub>27</sub>BrN<sub>2</sub>O<sub>4</sub>S: 507.0948. Found: 507.0951.

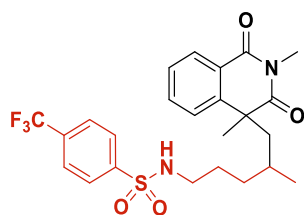

**N-(5-(2,4-dimethyl-1,3-dioxo-1,2,3,4-tetrahydroisoquinolin-4-yl)-4-methylpentyl)-4-(trifluoromethyl)benzenesulfonamide (5al)**

The crude was purified by silica gel column chromatography with petroleum ether/ethyl acetate (6:1-4:1). Yellow oil, yield 41% (dr = 1:1.9).

**<sup>1</sup>H NMR** (400 MHz, CDCl<sub>3</sub>) δ 8.26 – 8.22 (m, 1H), 7.98 – 7.93 (m, 2H), 7.79 – 7.76 (m, 2H), 7.65 – 7.60 (m, 1H), 7.46 – 7.32 (m, 2H), 4.74 (t, *J* = 6.0 Hz, 0.59H), 4.61 (t, *J* = 6.1 Hz, 0.33H), 3.36 (d, *J* = 5.5 Hz, 3H), 2.87 – 2.74 (m, 2H), 2.33 (dd, *J* = 14.0, 5.4 Hz, 0.66H), 2.22 (dd, *J* = 13.9, 8.2 Hz, 0.38H), 1.92 (dd, *J* = 14.0, 3.2 Hz, 0.37H), 1.76 (dd, *J* = 14.1, 6.1 Hz, 0.70H), 1.57 (s, 3H), 1.45 – 1.19 (m, 2H), 1.08 – 0.83 (m, 3H), 0.52 (d, *J* = 6.0 Hz, 1.01H), 0.37 (d, *J* = 6.4 Hz, 1.94H).

**<sup>13</sup>C NMR** (101 MHz, CDCl<sub>3</sub>) δ 176.87, 176.81, 164.39, 164.35, 143.69, 143.40, 133.96, 133.89, 128.95, 127.58, 127.52, 127.41, 127.38, 126.35, 126.32, 126.28, 126.24, 125.80, 125.66, 124.70, 124.49, 48.89, 48.81, 47.13, 46.63, 43.33, 43.22, 34.49, 33.60, 31.22, 31.07, 29.84, 29.52, 27.25, 27.23, 26.74, 26.07, 20.71, 19.28.

**<sup>19</sup>F NMR** (376 MHz, CDCl<sub>3</sub>) δ -63.08, -63.09.

**HRMS** (ESI) *m/z*: [M + H]<sup>+</sup> Calcd for C<sub>24</sub>H<sub>27</sub>F<sub>3</sub>N<sub>2</sub>O<sub>4</sub>S: 497.1716. Found: 497.1718.

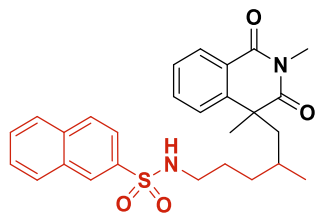

**N-(5-(2,4-dimethyl-1,3-dioxo-1,2,3,4-tetrahydroisoquinolin-4-yl)-4-methylpentyl)naphthalene-2-sulfonamide (5am)**

The crude was purified by silica gel column chromatography with petroleum ether/ethyl acetate (6:1-4:1). Yellow oil, yield 44% (dr = 1:1.5).

$^1\text{H NMR}$  (400 MHz,  $\text{CDCl}_3$ )  $\delta$  8.43 – 8.37 (m, 1H), 8.23 – 8.20 (m, 1H), 8.00 – 7.93 (m, 3H), 7.83 – 7.78 (m, 1H), 7.68 – 7.55 (m, 3H), 7.42 – 7.27 (m, 2H), 4.65 – 4.56 (m, 1H), 3.32 (d,  $J = 16.3$  Hz, 3H), 2.87 – 2.74 (m, 2H), 2.29 (dd,  $J = 14.0, 5.2$  Hz, 0.60H), 2.16 (dd,  $J = 13.9, 8.5$  Hz, 0.40H), 1.86 (dd,  $J = 14.0, 3.0$  Hz, 0.36H), 1.71 (dd,  $J = 14.0, 6.3$  Hz, 0.75H), 1.53 (d,  $J = 9.8$  Hz, 3H), 1.40 – 1.18 (m, 2H), 1.10 – 0.82 (m, 3H), 0.47 (d,  $J = 6.0$  Hz, 1.17H), 0.32 (d,  $J = 6.4$  Hz, 1.78H).

$^{13}\text{C NMR}$  (101 MHz,  $\text{CDCl}_3$ )  $\delta$  176.83, 176.77, 164.38, 164.35, 143.77, 143.35, 136.78, 136.73, 134.79, 133.94, 133.81, 132.18, 132.16, 129.52, 129.51, 129.26, 129.22, 128.93, 128.87, 128.85, 128.76, 128.43, 128.38, 127.94, 127.92, 127.64, 127.56, 127.34, 127.31, 125.79, 125.64, 124.65, 124.49, 122.36, 122.30, 77.37, 77.05, 76.74, 49.05, 48.65, 47.10, 46.57, 43.35, 43.24, 34.61, 33.79, 31.30, 30.92, 29.88, 29.53, 27.23, 27.18, 26.69, 26.14, 20.66, 19.28.

**HRMS** (ESI)  $m/z$ :  $[\text{M} + \text{H}]^+$  Calcd for  $\text{C}_{27}\text{H}_{30}\text{N}_2\text{O}_4\text{S}$ : 479.1999. Found: 479.2001.

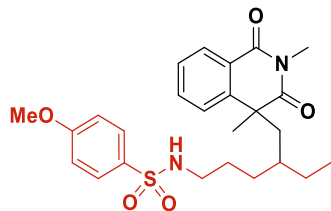

**N-(4-((2,4-dimethyl-1,3-dioxo-1,2,3,4-tetrahydroisoquinolin-4-yl)methyl)hexyl)-4-methoxybenzenesulfonamide (5an)**

The crude was purified by silica gel column chromatography with petroleum ether/ethyl acetate (6:1-4:1). Yellow oil, yield 69% (dr = 1:1).

$^1\text{H NMR}$  (400 MHz,  $\text{CDCl}_3$ )  $\delta$  8.24 – 8.21 (m, 1H), 7.80 – 7.70 (m, 2H), 7.65 – 7.57 (m, 1H), 7.45 – 7.34 (m, 2H), 7.00 – 6.90 (m, 2H), 4.50 (t,  $J = 6.1$  Hz, 0.50H), 4.37 (t,  $J = 6.2$  Hz, 0.42H), 3.86 (d,  $J = 1.9$  Hz, 3H), 3.39 – 3.30 (m, 3H), 2.86 – 2.53 (m, 2H), 2.24 – 2.17 (m, 1H), 1.85 – 1.73 (m, 1H), 1.59 (d,  $J = 5.5$  Hz, 3H), 1.36 – 1.08 (m, 2H), 0.99 – 0.75 (m, 5H), 0.61 (t,  $J = 7.3$  Hz, 1.24H), 0.53 (t,  $J = 7.0$  Hz, 1.44H).

$^{13}\text{C NMR}$  (101 MHz,  $\text{CDCl}_3$ )  $\delta$  176.94, 176.64, 164.41, 164.37, 162.85, 162.82, 143.60, 143.53, 133.92, 133.84, 131.57, 131.52, 129.23, 129.21, 129.16, 128.85, 128.79, 127.40, 127.36, 125.78, 125.73, 124.77, 124.67, 114.23, 55.64, 55.62, 47.02, 46.97, 46.91, 45.89, 43.37, 43.14, 35.59, 35.51, 30.46, 30.29, 29.80, 29.60, 27.24, 27.15, 26.35, 26.13, 25.71, 25.30, 10.42, 10.16.

**HRMS** (ESI)  $m/z$ :  $[\text{M} + \text{H}]^+$  Calcd for  $\text{C}_{25}\text{H}_{32}\text{N}_2\text{O}_5\text{S}$ : 473.2105. Found: 473.2107.

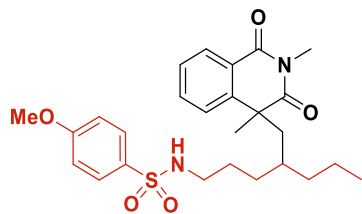

**N-(4-((2,4-dimethyl-1,3-dioxo-1,2,3,4-tetrahydroisoquinolin-4-yl)methyl)heptyl)-4-methoxybenzenesulfonamide (5ao)**

The crude was purified by silica gel column chromatography with petroleum ether/ethyl acetate (6:1-4:1). Yellow oil, yield 64% (dr = 1:1).

**<sup>1</sup>H NMR** (400 MHz, CDCl<sub>3</sub>) δ 8.24 – 8.21 (m, 1H), 7.79 – 7.71 (m, 2H), 7.63 – 7.60 (m, 1H), 7.44 – 7.35 (m, 2H), 6.97 – 6.96 (m, 2H), 4.50 (s, 0.45H), 4.36 (s, 0.51H), 3.86 (d, *J* = 1.3 Hz, 3H), 3.34 (d, *J* = 13.1 Hz, 3H), 2.78 – 2.57 (m, 2H), 2.23 – 2.18 (m, 1H), 1.83 – 1.71 (m, 1H), 1.59 (d, *J* = 8.7 Hz, 3H), 1.35 – 1.03 (m, 3H), 0.98 – 0.72 (m, 6H), 0.67 (t, *J* = 7.2 Hz, 1.50H), 0.56 (t, *J* = 7.3 Hz, 1.41H).

**<sup>13</sup>C NMR** (101 MHz, CDCl<sub>3</sub>) δ 176.96, 176.69, 164.41, 164.37, 162.84, 162.80, 143.58, 143.54, 133.93, 133.85, 131.54, 131.50, 129.22, 129.20, 129.16, 128.84, 128.78, 127.40, 127.36, 125.79, 125.75, 124.75, 124.68, 114.22, 55.64, 55.62, 47.47, 46.97, 46.88, 46.38, 43.37, 43.15, 36.19, 35.63, 33.96, 33.89, 30.79, 30.41, 30.12, 29.81, 27.24, 27.15, 26.09, 25.29, 19.12, 18.92, 14.15, 13.98.

**HRMS** (ESI) *m/z*: [M + H]<sup>+</sup> Calcd for C<sub>26</sub>H<sub>34</sub>N<sub>2</sub>O<sub>5</sub>S: 487.2261. Found: 487.2264.

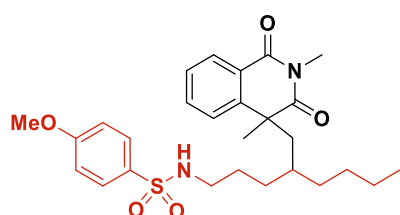

**N-(4-((2,4-dimethyl-1,3-dioxo-1,2,3,4-tetrahydroisoquinolin-4-yl)methyl)octyl)-4-methoxybenzenesulfonamide (5ap)**

The crude was purified by silica gel column chromatography with petroleum ether/ethyl acetate (6:1-4:1). Yellow oil, yield 57% (dr = 1:1.4).

**<sup>1</sup>H NMR** (400 MHz, CDCl<sub>3</sub>) δ 8.24 – 8.21 (m, 1H), 7.80 – 7.70 (m, 2H), 7.64 – 7.59 (m, 1H), 7.45 – 7.34 (m, 2H), 7.00 – 6.92 (m, 2H), 4.50 (d, *J* = 6.6 Hz, 0.50H), 4.36 (t, *J* = 6.3 Hz, 0.45H), 3.86 (d, *J* = 0.9 Hz, 3H), 3.34 (d, *J* = 7.5 Hz, 3H), 2.78 – 2.59 (m, 2H), 2.27 – 2.13 (m, 1H), 1.88 – 1.74 (m, 1H), 1.58 (d, *J* = 4.5 Hz, 3H), 1.32 – 1.00 (m, 4H), 0.96 – 0.80 (m, 7H), 0.80 – 0.73 (m, 1.82H), 0.69 – 0.67 (m, 1.28H).

**<sup>13</sup>C NMR** (101 MHz, CDCl<sub>3</sub>) δ 176.92, 176.66, 164.39, 164.36, 162.85, 162.82, 143.61, 143.57, 133.90, 133.80, 131.60, 131.57, 129.22, 129.16, 128.84, 128.79, 127.39, 127.34, 125.78, 125.76, 124.78, 124.70, 114.22, 55.63, 55.60, 47.50, 47.01, 46.89, 46.50, 43.38, 43.17, 34.20, 34.13, 33.61, 33.05, 30.82, 30.37, 30.20, 29.84, 28.20, 28.01, 27.22, 27.14, 26.14, 25.38, 22.79, 22.58, 13.92, 13.88.

**HRMS** (ESI) *m/z*: [M + H]<sup>+</sup> Calcd for C<sub>27</sub>H<sub>36</sub>N<sub>2</sub>O<sub>5</sub>S: 501.2418. Found: 501.2421.

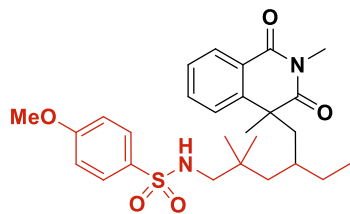

**N-(4-((2,4-dimethyl-1,3-dioxo-1,2,3,4-tetrahydroisoquinolin-4-yl)methyl)-2,2-dimethylhexyl)-4-methoxybenzenesulfonamide (5aq)**

The crude was purified by silica gel column chromatography with petroleum ether/ethyl acetate (6:1-4:1). Yellow oil, yield 49%.

$^1\text{H NMR}$  (400 MHz,  $\text{CDCl}_3$ )  $\delta$  8.28 – 8.23 (m, 1H), 7.84 – 7.72 (m, 2H), 7.68 – 7.60 (m, 1H), 7.48 – 7.40 (m, 2H), 7.00 – 6.98 (m, 2H), 4.51 (t,  $J = 7.0$  Hz, 0.69H), 4.37 (t,  $J = 6.8$  Hz, 0.30H), 3.89 (s, 3H), 3.37 (d,  $J = 6.6$  Hz, 3H), 2.55 – 2.43 (m, 2H), 2.36 (dd,  $J = 14.0, 7.4$  Hz, 0.38H), 2.23 (dd,  $J = 14.3, 4.8$  Hz, 0.64H), 1.97 (dd,  $J = 14.2, 6.4$  Hz, 0.74H), 1.85 (dd,  $J = 14.3, 3.5$  Hz, 0.30H), 1.61 (d,  $J = 3.3$  Hz, 3H), 1.08 – 0.87 (m, 4H), 0.80 – 0.74 (m, 1H), 0.73 – 0.61 (m, 6H), 0.58 – 0.50 (m, 3H).

$^{13}\text{C NMR}$  (101 MHz,  $\text{CDCl}_3$ )  $\delta$  176.86, 176.70, 164.38, 164.36, 162.83, 162.77, 143.97, 143.33, 133.81, 133.77, 131.71, 131.57, 129.20, 129.17, 129.14, 128.86, 128.83, 127.43, 127.36, 126.16, 125.86, 124.86, 124.49, 114.24, 114.20, 55.63, 55.61, 54.02, 53.87, 49.00, 48.18, 47.12, 46.93, 43.38, 43.30, 34.40, 34.23, 32.32, 31.82, 31.05, 30.46, 27.61, 27.16, 27.14, 27.03, 25.30, 25.22, 24.92, 24.73, 9.72, 9.67.

**HRMS** (ESI)  $m/z$ :  $[\text{M} + \text{H}]^+$  Calcd for  $\text{C}_{27}\text{H}_{36}\text{N}_2\text{O}_5\text{S}$ : 501.2418. Found: 501.2420.

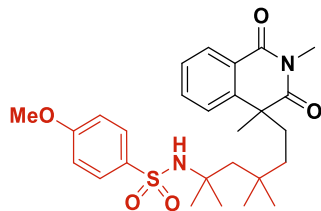

**N-(6-(2,4-dimethyl-1,3-dioxo-1,2,3,4-tetrahydroisoquinolin-4-yl)-2,4,4-trimethylhexan-2-yl)-4-methoxybenzenesulfonamide (5ar)**

The crude was purified by silica gel column chromatography with petroleum ether/ethyl acetate (6:1-4:1). Yellow oil, yield 43%.

$^1\text{H NMR}$  (400 MHz,  $\text{CDCl}_3$ )  $\delta$  8.25 – 8.23 (m, 1H), 7.80 – 7.71 (m, 2H), 7.66 – 7.61 (m, 1H), 7.46 – 7.36 (m, 2H), 6.96 – 6.88 (m, 2H), 4.45 (s, 1H), 3.86 (s, 3H), 3.37 (s, 3H), 2.29 – 2.22 (m, 1H), 1.87 – 1.79 (m, 1H), 1.60 (s, 3H), 1.46 – 1.32 (m, 2H), 1.25 (s, 1H), 1.14 – 1.12 (m, 6H), 0.98 (s, 1H), 0.86 – 0.83 (m, 6H).

$^{13}\text{C NMR}$  (101 MHz,  $\text{CDCl}_3$ )  $\delta$  176.67, 164.48, 162.44, 143.54, 135.39, 134.06, 129.06, 128.81, 127.32, 125.15, 124.99, 113.97, 58.21, 55.57, 52.51, 47.62, 39.83, 37.20, 33.65, 31.63, 29.83, 29.44, 29.42, 28.40, 28.22, 27.13.

**HRMS** (ESI)  $m/z$ :  $[\text{M} + \text{H}]^+$  Calcd for  $\text{C}_{27}\text{H}_{36}\text{N}_2\text{O}_5\text{S}$ : 501.2418. Found: 501.2419.

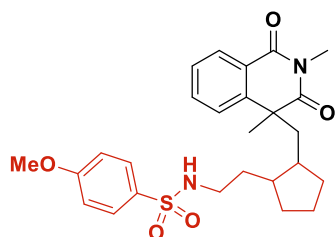

**N-(2-(2-((2,4-dimethyl-1,3-dioxo-1,2,3,4-tetrahydroisoquinolin-4-yl)methyl)cyclopentyl)ethyl)-4-methoxybenzenesulfonamide (5as)**

The crude was purified by silica gel column chromatography with petroleum ether/ethyl acetate (6:1-4:1). Yellow oil, yield 63%.

**<sup>1</sup>H NMR** (400 MHz, CDCl<sub>3</sub>) δ 8.23 – 8.20 (m, 1H), 7.85 – 7.74 (m, 2H), 7.62 – 7.58 (m, 1H), 7.45 – 7.27 (m, 2H), 7.04 – 6.90 (m, 2H), 4.66 – 4.53 (m, 1H), 3.87 (s, 3H), 3.34 (d, *J* = 5.6 Hz, 3H), 2.99 – 2.72 (m, 2H), 2.40 (dd, *J* = 13.7, 2.2 Hz, 0.60H), 2.15 (dd, *J* = 13.8, 10.6 Hz, 0.43H), 2.03 (dd, *J* = 13.8, 2.6 Hz, 0.48H), 1.71 (dd, *J* = 13.7, 9.8 Hz, 0.56H), 1.59 (d, *J* = 3.2 Hz, 3H), 1.41 – 0.98 (m, 6H), 0.91 – 0.37 (m, 4H).

**<sup>13</sup>C NMR** (101 MHz, CDCl<sub>3</sub>) δ 176.73, 164.53, 162.82, 143.99, 134.06, 133.62, 131.56, 129.27, 129.25, 129.21, 128.82, 128.73, 127.38, 127.30, 126.16, 125.49, 124.48, 114.27, 114.25, 55.66, 55.63, 48.80, 47.99, 47.73, 46.97, 43.86, 43.55, 43.47, 42.44, 42.22, 42.13, 33.94, 33.75, 32.78, 31.13, 30.83, 30.56, 30.38, 29.69, 27.26, 27.10, 23.86, 23.79.

**HRMS** (ESI) *m/z*: [M + H]<sup>+</sup> Calcd for C<sub>26</sub>H<sub>32</sub>N<sub>2</sub>O<sub>5</sub>S: 485.2105. Found: 485.2108.

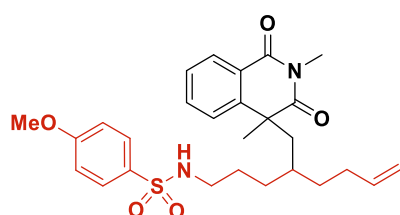

**N-(4-((2,4-dimethyl-1,3-dioxo-1,2,3,4-tetrahydroisoquinolin-4-yl)methyl)oct-7-en-1-yl)-4-methoxybenzenesulfonamide (5at)**

The crude was purified by silica gel column chromatography with petroleum ether/ethyl acetate (6:1-4:1). Yellow oil, yield 54%.

**<sup>1</sup>H NMR** (400 MHz, CDCl<sub>3</sub>) δ 8.24 – 8.20 (m, 1H), 7.80 – 7.70 (m, 2H), 7.64 – 7.60 (m, 1H), 7.45 – 7.34 (m, 2H), 6.98 – 6.95 (m, 2H), 5.57 – 5.34 (m, 1H), 4.92 – 4.67 (m, 2H), 4.57 (t, *J* = 5.2 Hz, 0.49H), 4.44 (q, *J* = 5.8 Hz, 0.50H), 3.86 (s, 3H), 3.33 (d, *J* = 6.3 Hz, 3H), 2.77 – 2.57 (m, 2H), 2.26 – 2.19 (m, 1H), 1.85 – 1.79 (m, 1H), 1.74 – 1.62 (m, 2H), 1.58 (d, *J* = 4.8 Hz, 3H), 1.29 – 1.08 (m, 2H), 1.02 – 0.78 (m, 5H).

**<sup>13</sup>C NMR** (101 MHz, CDCl<sub>3</sub>) δ 176.89, 176.64, 164.35, 164.31, 162.85, 162.82, 143.48, 143.43, 138.16, 138.12, 133.96, 133.91, 131.51, 131.48, 129.23, 129.16, 128.90, 128.82, 127.45, 127.42, 125.78, 124.75, 124.67, 114.65, 114.64, 114.24, 55.65, 55.63, 47.17, 46.96, 46.83, 46.28, 43.32, 43.11, 33.59, 33.58, 33.15, 32.47, 30.62, 30.51, 30.32, 29.97, 29.93, 27.25, 27.20, 26.04, 25.22.

**HRMS** (ESI) *m/z*: [M + H]<sup>+</sup> Calcd for C<sub>27</sub>H<sub>34</sub>N<sub>2</sub>O<sub>5</sub>S: 499.2261. Found: 499.2262.



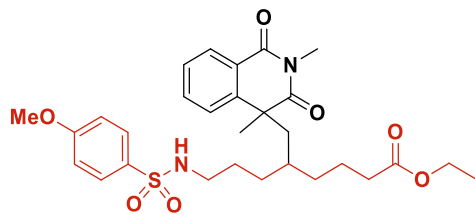

**ethyl 5-((2,4-dimethyl-1,3-dioxo-1,2,3,4-tetrahydroisoquinolin-4-yl)methyl)-8-((4-methoxyphenyl)sulfonamido)octanoate (5au)**

The crude was purified by silica gel column chromatography with petroleum ether/ethyl acetate (6:1-4:1). Yellow oil, yield 65%.

$^1\text{H NMR}$  (400 MHz,  $\text{CDCl}_3$ )  $\delta$  8.25 – 8.21 (m, 1H), 7.79 – 7.72 (m, 2H), 7.65 – 7.60 (m, 1H), 7.47 – 7.34 (m, 2H), 6.98 – 6.95 (m, 2H), 4.50 (s, 0.51H), 4.35 (s, 0.44H), 4.10 – 4.04 (m, 2H), 3.87 (d,  $J = 1.1$  Hz, 3H), 3.36 – 3.33 (m, 3H), 2.77 – 2.59 (m, 2H), 2.27 – 2.05 (m, 2H), 1.97 – 1.91 (m, 1H), 1.86 – 1.77 (m, 1H), 1.60 – 1.58 (m, 3H), 1.41 – 1.25 (m, 3H), 1.24 – 1.20 (m, 3H), 1.18 – 1.09 (m, 1H), 1.00 – 0.76 (m, 5H).

$^{13}\text{C NMR}$  (101 MHz,  $\text{CDCl}_3$ )  $\delta$  176.82, 176.60, 173.37, 173.34, 164.29, 164.26, 162.85, 162.82, 143.46, 143.39, 133.97, 133.92, 131.55, 131.51, 129.23, 129.16, 128.92, 128.87, 127.48, 127.43, 125.76, 125.69, 124.71, 124.69, 114.23, 60.28, 55.63, 55.61, 47.01, 46.93, 46.89, 45.98, 43.27, 43.08, 34.15, 34.06, 34.03, 33.97, 33.29, 32.69, 30.56, 30.02, 29.87, 27.27, 27.17, 25.97, 25.19, 21.31, 21.08, 14.24.

**HRMS** (ESI)  $m/z$ :  $[\text{M} + \text{H}]^+$  Calcd for  $\text{C}_{29}\text{H}_{38}\text{N}_2\text{O}_7\text{S}$ : 559.2472. Found: 559.2474.

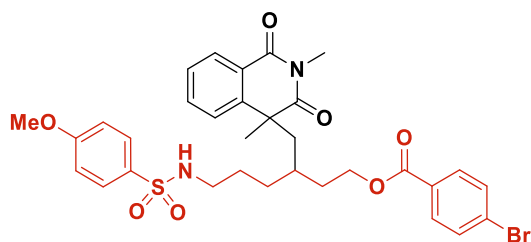

**3-((2,4-dimethyl-1,3-dioxo-1,2,3,4-tetrahydroisoquinolin-4-yl)methyl)-6-((4-methoxyphenyl)sulfonamido)hexyl 4-bromobenzoate (5av)**

The crude was purified by silica gel column chromatography with petroleum ether/ethyl acetate (6:1-4:1). Yellow oil, yield 42%.

$^1\text{H NMR}$  (400 MHz,  $\text{CDCl}_3$ )  $\delta$  8.18 – 8.13 (m, 1H), 7.79 – 7.65 (m, 4H), 7.62 – 7.50 (m, 3H), 7.41 – 7.28 (m, 2H), 7.00 – 6.93 (m, 2H), 4.53 (t,  $J = 6.1$  Hz, 0.46H), 4.42 (t,  $J = 6.3$  Hz, 0.54H), 4.16 – 3.96 (m, 2H), 3.86 (s, 3H), 3.33 (d,  $J = 3.7$  Hz, 3H), 2.80 – 2.73 (m, 1H), 2.67 – 2.62 (m, 1H), 2.39 – 2.28 (m, 1H), 1.96 – 1.85 (m, 1H), 1.59 (d,  $J = 2.2$  Hz, 3H), 1.43 – 1.32 (m, 2H), 1.29 – 1.20 (m, 2H), 1.16 – 0.90 (m, 3H).

$^{13}\text{C NMR}$  (101 MHz,  $\text{CDCl}_3$ )  $\delta$  176.73, 176.61, 165.66, 165.63, 164.14, 162.87, 162.84, 143.14, 143.04, 134.03, 131.76, 131.72, 131.50, 131.44, 131.04, 131.00, 129.23, 129.15, 128.96, 128.94, 128.88, 128.85, 128.18, 128.12, 127.49, 127.47, 125.73, 125.48, 124.65, 124.63, 114.26, 62.28, 55.65, 55.63, 46.83, 46.81, 46.49, 45.57, 43.15, 42.95, 32.87, 32.19, 31.20, 30.97, 30.78, 30.54, 30.46, 29.77, 27.31, 27.24, 26.01, 25.07.

**HRMS** (ESI)  $m/z$ :  $[\text{M} + \text{H}]^+$  Calcd for  $\text{C}_{32}\text{H}_{35}\text{BrN}_2\text{O}_7\text{S}$ : 671.1421. Found: 671.1424.

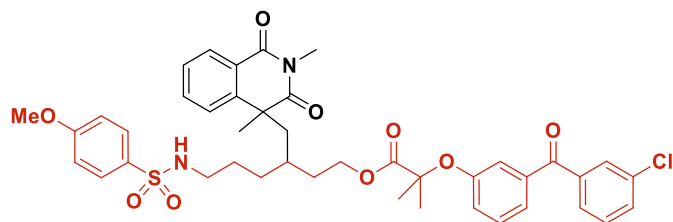

**3-((2,4-dimethyl-1,3-dioxo-1,2,3,4-tetrahydroisoquinolin-4-yl)methyl)-6-((4-methoxyphenyl)sulfonamido)hexyl 2-(4-benzoylphenoxy)-2-methylpropanoate (5aw)**

The crude was purified by silica gel column chromatography with petroleum ether/ethyl acetate (6:1-4:1). Yellow oil, yield 41%.

<sup>1</sup>H NMR (400 MHz, CDCl<sub>3</sub>) δ 8.22 – 8.16 (m, 1H), 7.78 – 7.73 (m, 2H), 7.71 – 7.56 (m, 5H), 7.47 – 7.30 (m, 4H), 6.99 – 6.92 (m, 2H), 6.76 – 6.69 (m, 2H), 4.89 – 4.83 (m, 1H), 4.13 – 3.91 (m, 1H), 3.85 (s, 3H), 3.31 (d, *J* = 6.3 Hz, 3H), 2.70 – 2.50 (m, 2H), 2.28 – 2.14 (m, 1H), 1.83 – 1.77 (m, 1H), 1.60 – 1.50 (m, 9H), 1.28 – 1.15 (m, 2H), 1.14 – 1.01 (m, 2H), 0.99 – 0.78 (m, 3H).

<sup>13</sup>C NMR (101 MHz, CDCl<sub>3</sub>) δ 194.60, 194.55, 176.55, 176.51, 173.54, 173.48, 164.13, 164.07, 162.77, 159.66, 159.56, 143.10, 138.65, 136.10, 134.08, 134.04, 132.05, 132.02, 131.69, 131.56, 131.36, 131.31, 130.38, 130.20, 129.85, 129.22, 129.15, 129.04, 128.90, 128.62, 127.55, 127.51, 125.78, 125.60, 124.62, 124.54, 117.06, 116.88, 114.26, 114.21, 79.28, 63.02, 62.95, 60.42, 55.64, 55.62, 46.87, 46.75, 46.20, 45.53, 43.17, 43.00, 32.48, 31.99, 31.31, 31.28, 30.88, 30.37, 30.17, 29.45, 27.28, 27.18, 25.92, 25.73, 25.61, 25.06, 24.99, 24.76, 21.08, 14.21.

HRMS (ESI) *m/z*: [M + H]<sup>+</sup> Calcd for C<sub>42</sub>H<sub>45</sub>ClN<sub>2</sub>O<sub>9</sub>S: 789.2607. Found: 789.2611.

## 8. References

- 1 S. Huang, P. Niu, Y. Su, D. Hu and C. Huo, *Org. Biomol. Chem.*, 2018, **16**, 7748-7752.
- 2 S. Wang, P. Dai, Z. Yan, Y. Wang, J. Shao, Y. Wu, C. Deng and W. Zhang, *ChemistrySelect.*, 2019, **4**, 10329-10333.
- 3 Y. Su, R. Zhang, W. Xue, X. Liu, Y. Zhao, K.-H. Wang, D. Huang, C. Huo and Y. Hu, *Org. Biomol. Chem.*, 2020, **18**, 1940-1948.
- 4 X. Li, S. Zhuang, X. Fang, P. Liu and P. Sun, *Org. Biomol. Chem.*, 2017, **15**, 1821-1827.
- 5 Z. Deng, G.-X. Li, G. He and G. Chen, *J. Org. Chem.*, 2019, **84**, 15777-15787.
- 6 Z. Deng, Z. Zhao, G. He and G. Chen, *Org. Lett.*, 2021, **23**, 3631-3635.
- 7 Y. Zhu, J. Shi and W. Yu, *Org. Lett.*, 2020, **22**, 8899-8903.
- 8 Z. Deng, Z. Zhao, G. He and G. Chen, *Org. Lett.*, 2021, **23**, 3631-3635.
- 9 Z. Chen, W. Zhu, C. Wang, N. Xu, Q. Jin, X. Huang, S. Song and J. Li, *Org. Chem. Front.*, 2023, **10**, 4709-4717.

## 9. Copies of NMR Spectra

$^1\text{H}$  and  $^{13}\text{C}$  NMR spectra of **4c**:

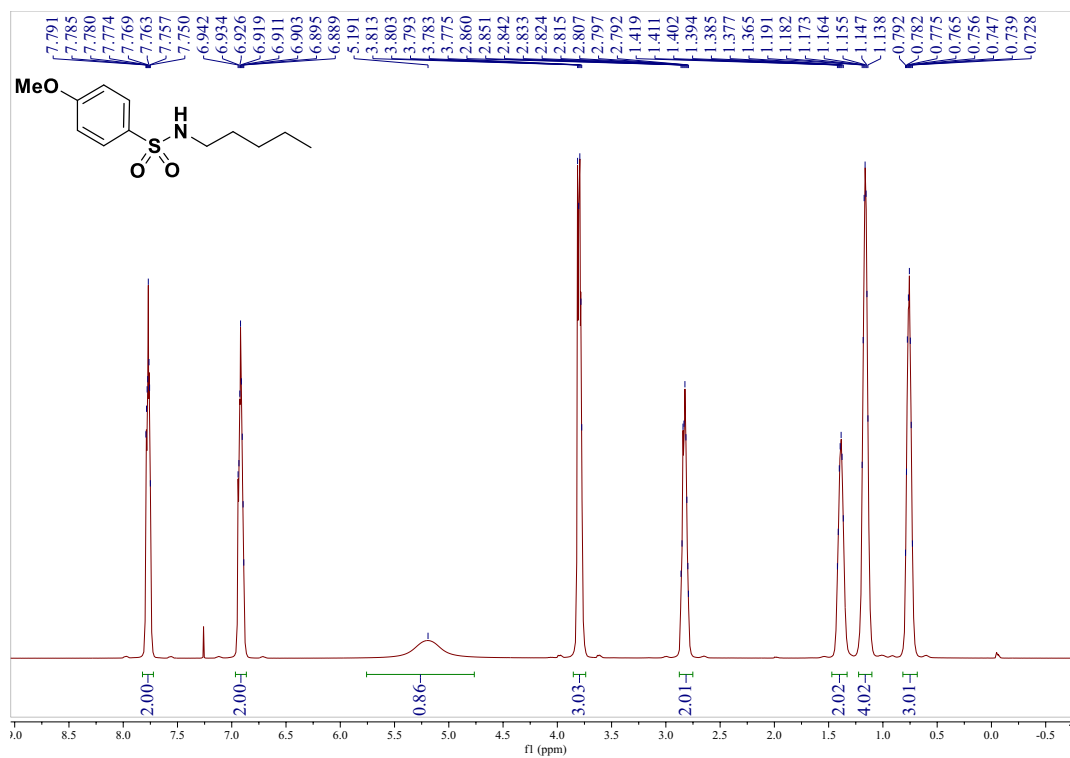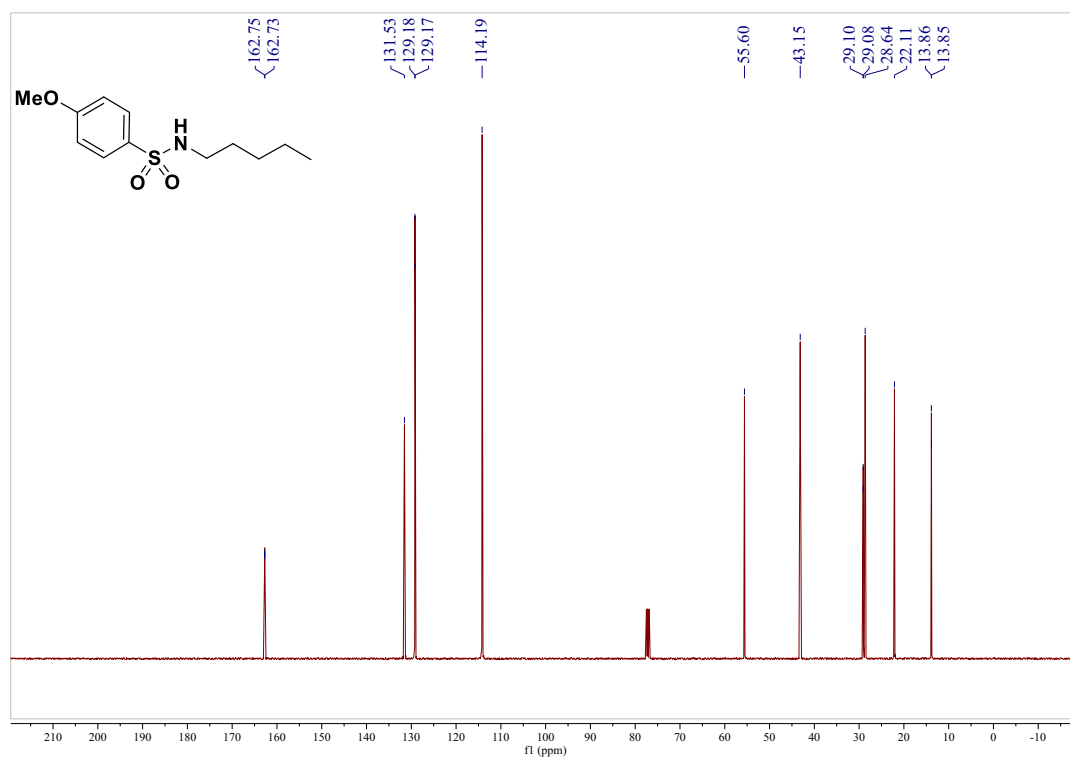

$^1\text{H}$  and  $^{13}\text{C}$  NMR spectra of 4m:

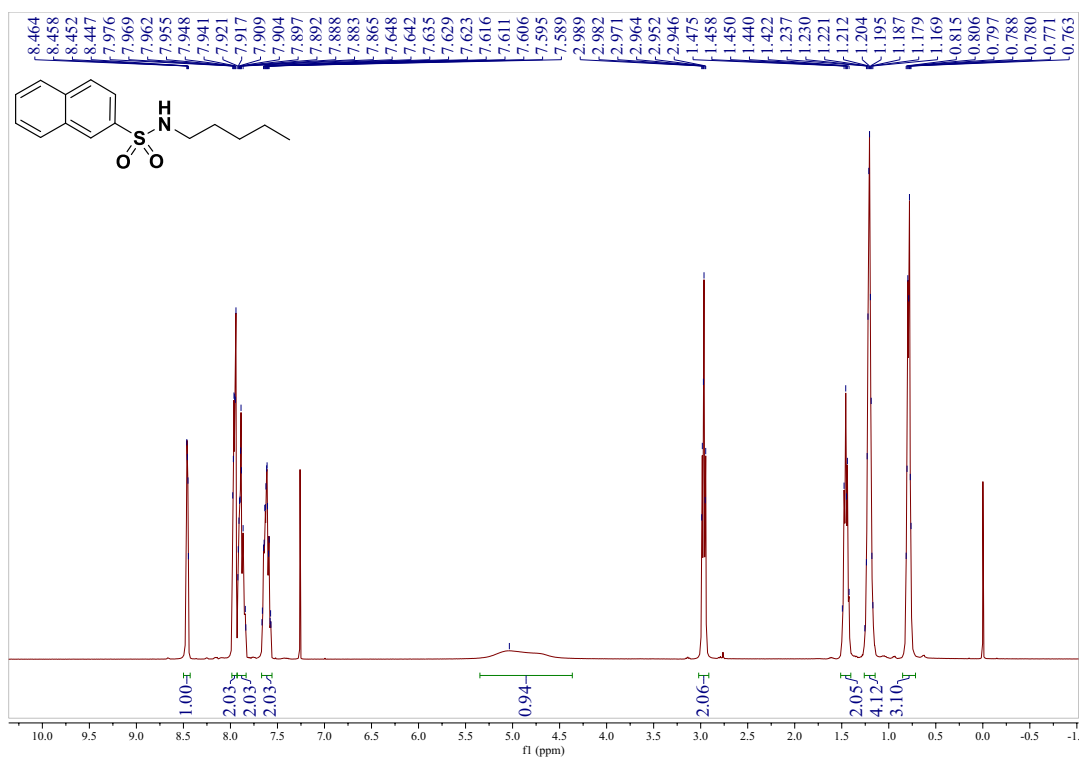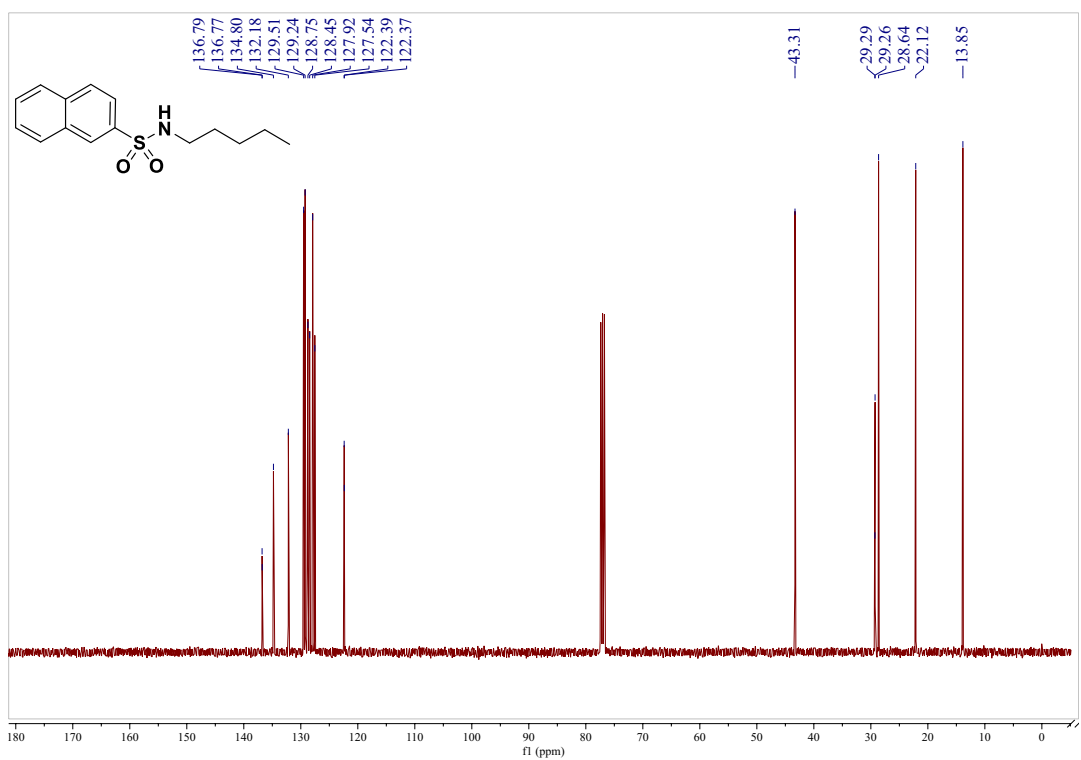

$^1\text{H}$  and  $^{13}\text{C}$  NMR spectra of **4n**:

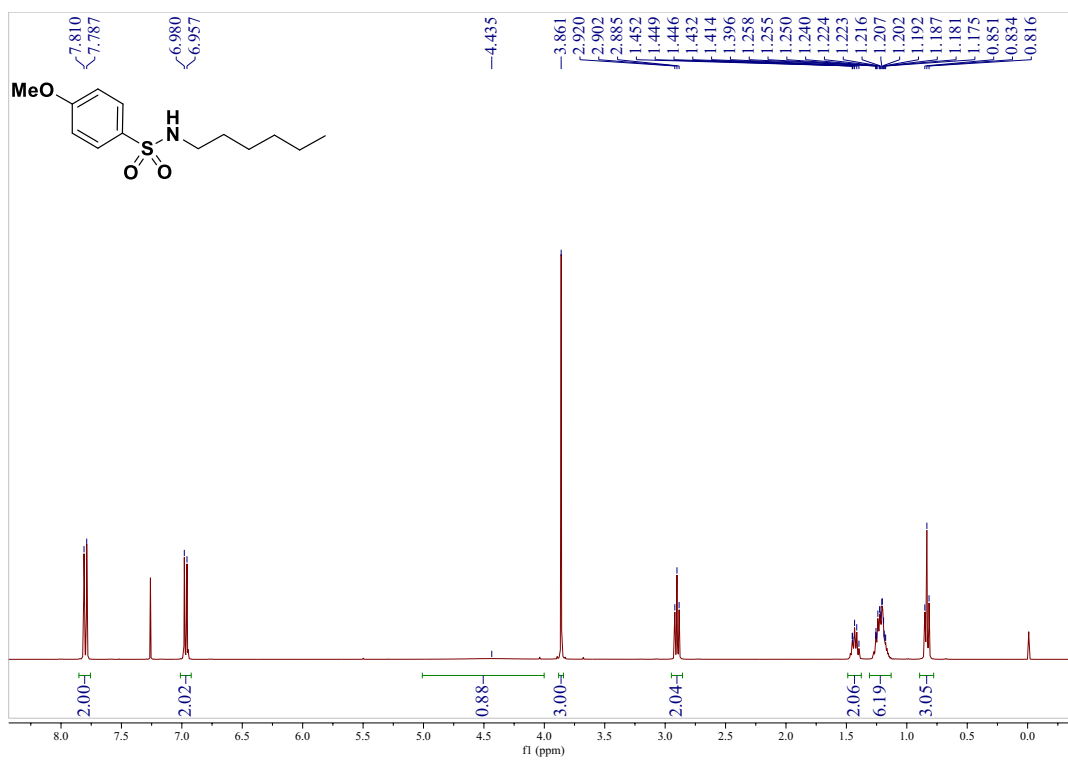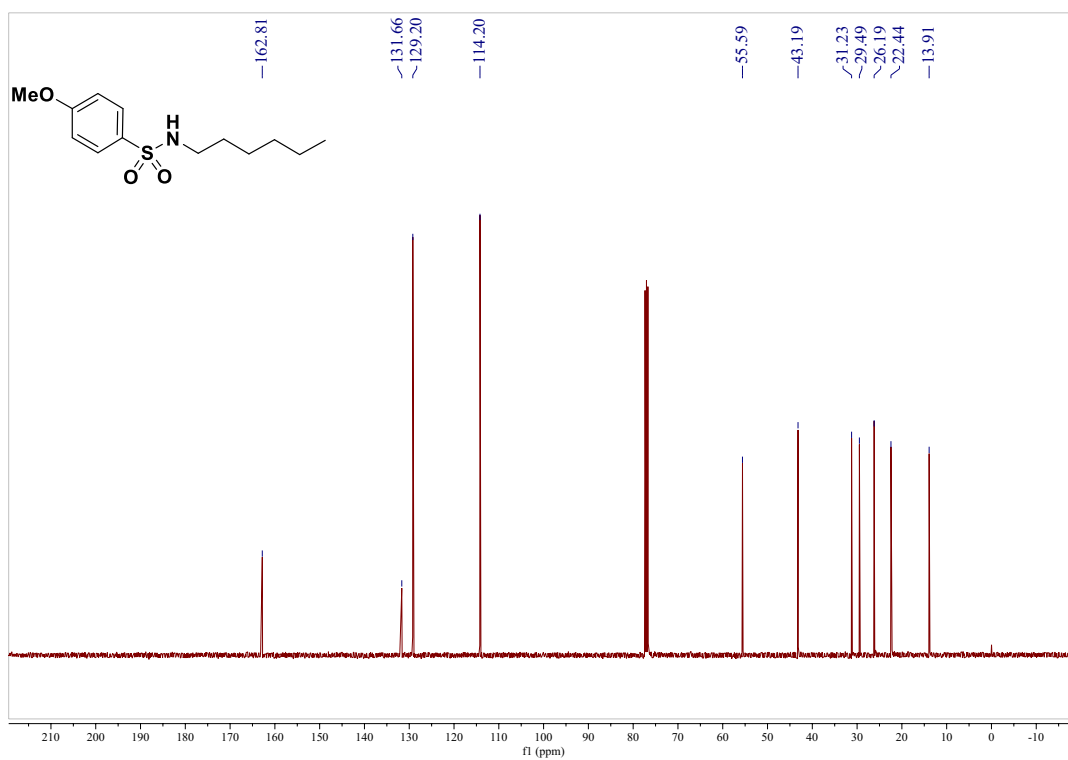

$^1\text{H}$  and  $^{13}\text{C}$  NMR spectra of 4o:

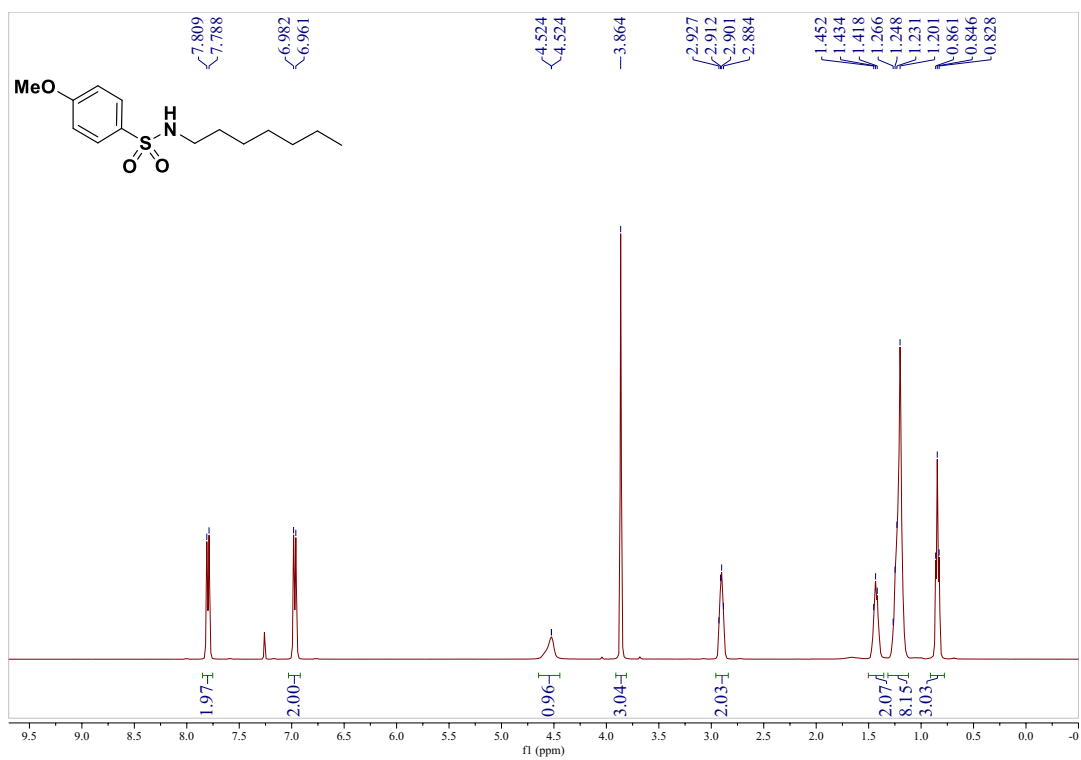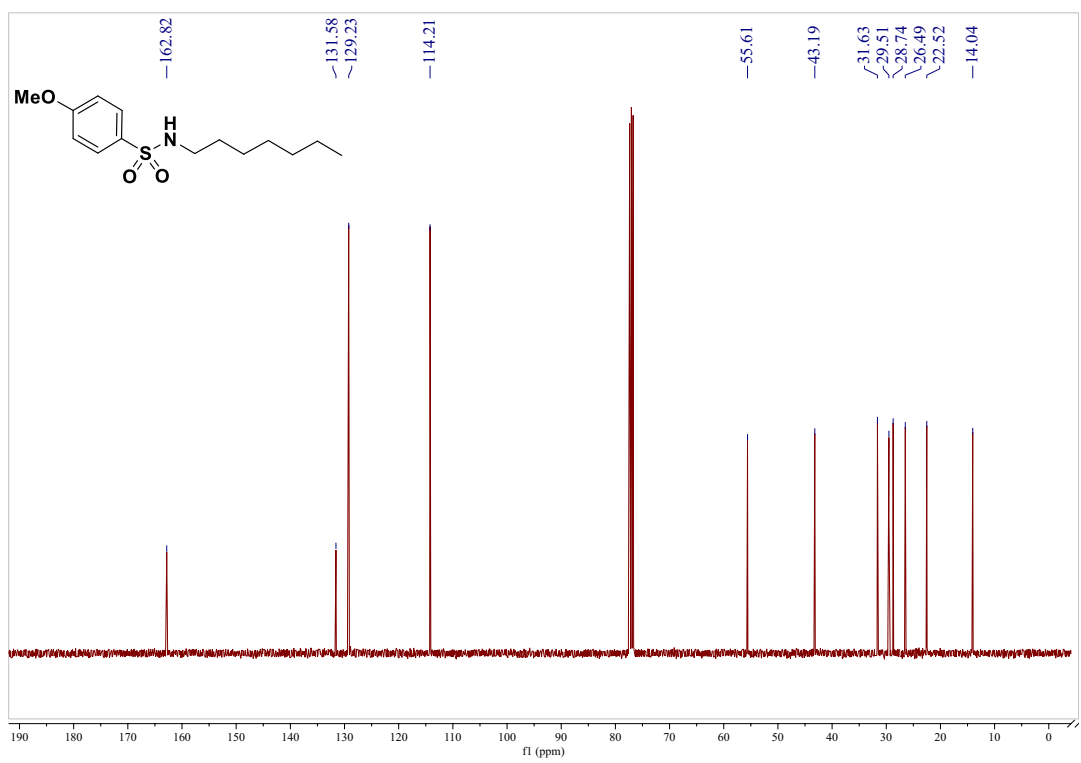

<sup>1</sup>H and <sup>13</sup>C NMR spectra of 4p:

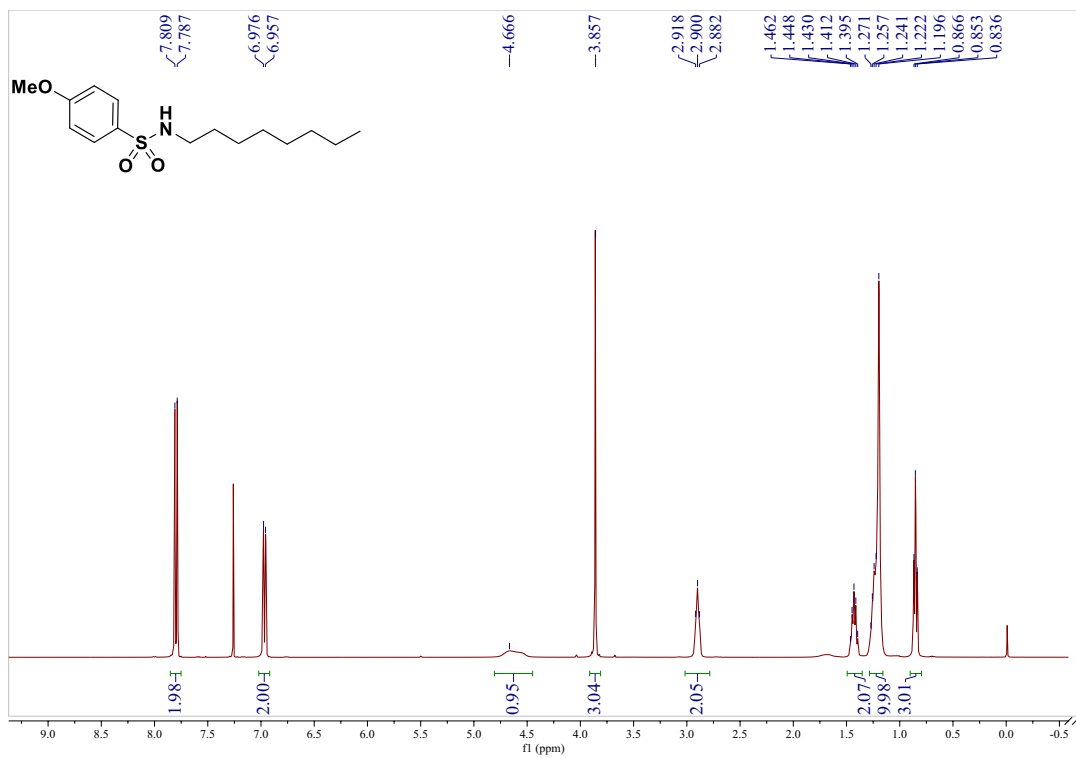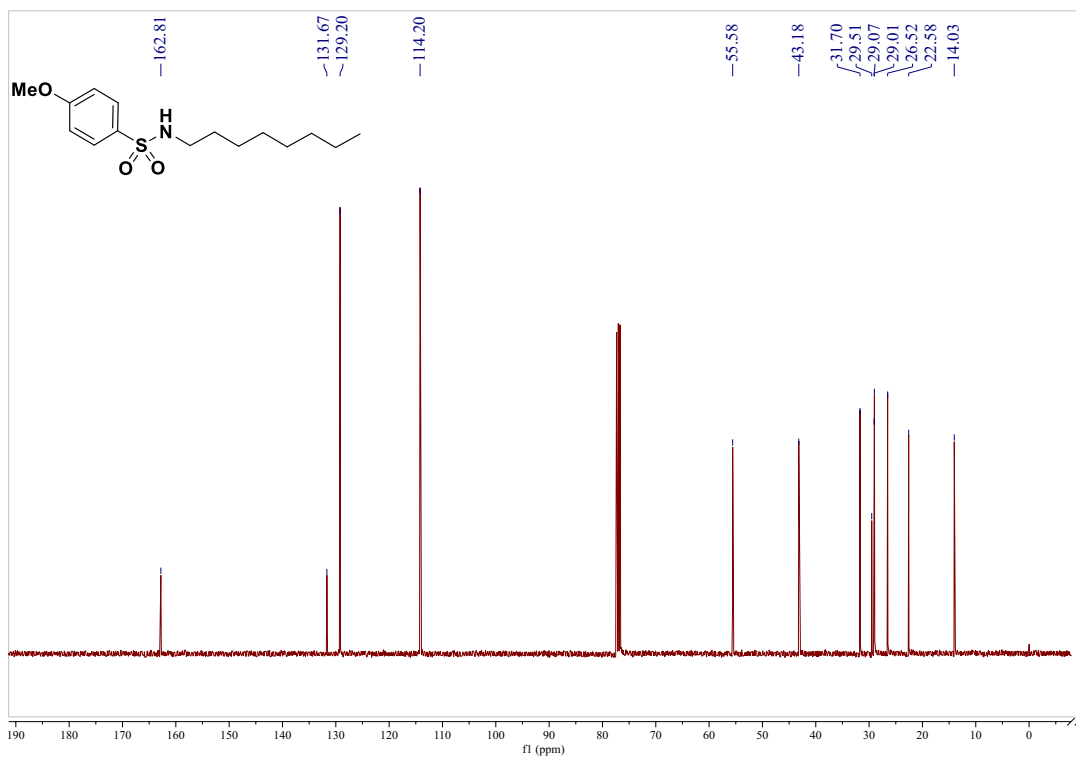

$^1\text{H}$  and  $^{13}\text{C}$  NMR spectra of **4q**:

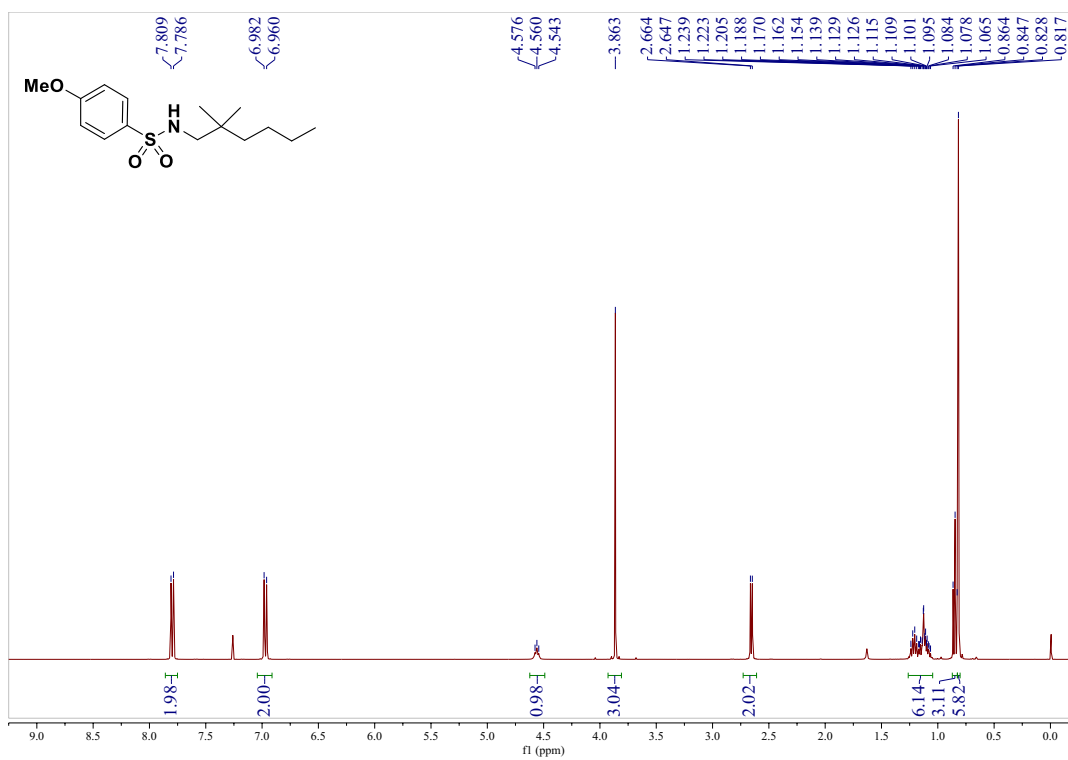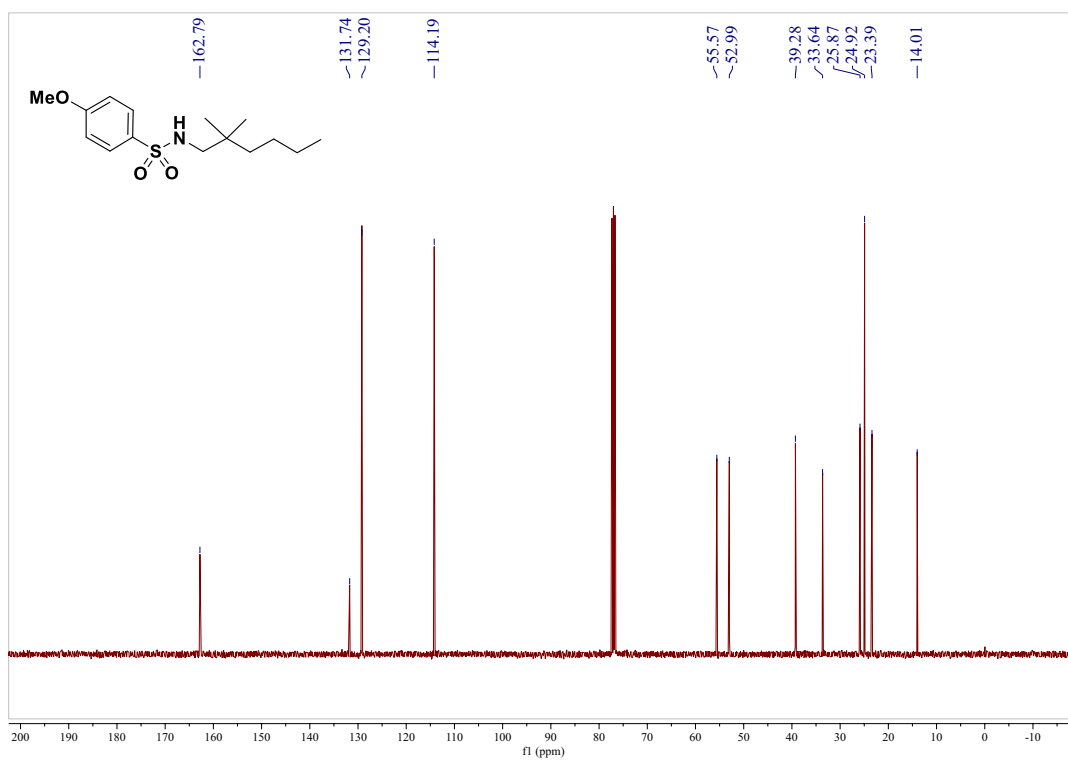



$^1\text{H}$  and  $^{13}\text{C}$  NMR spectra of 4r:

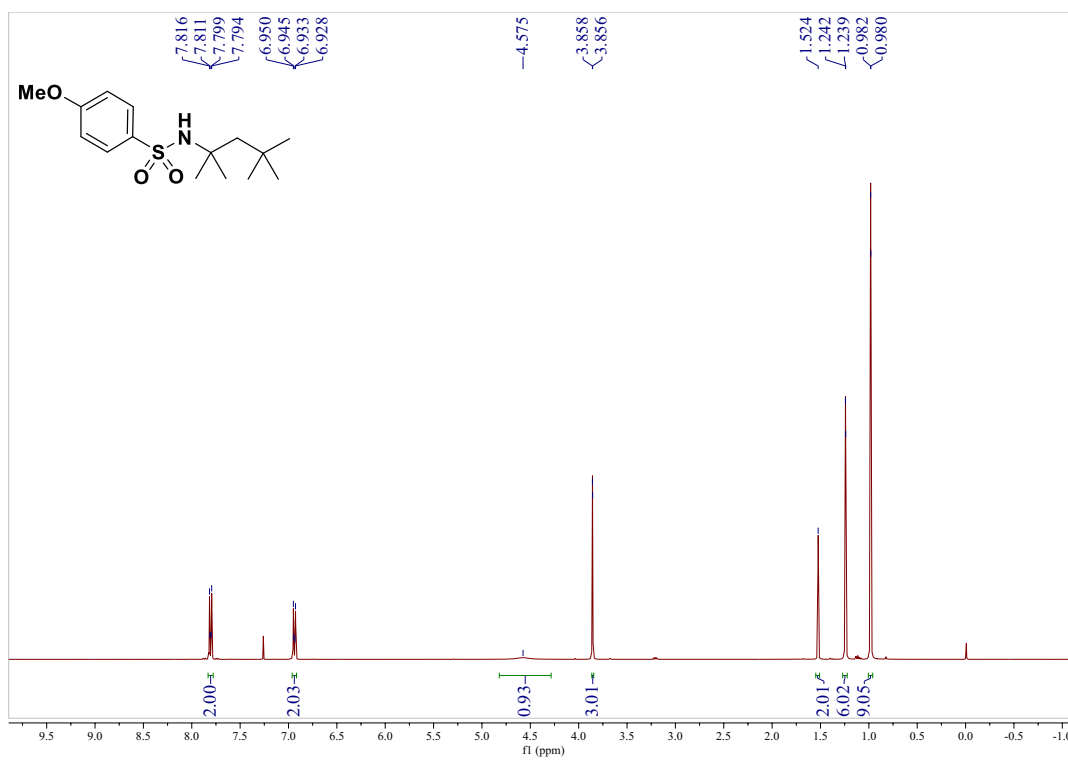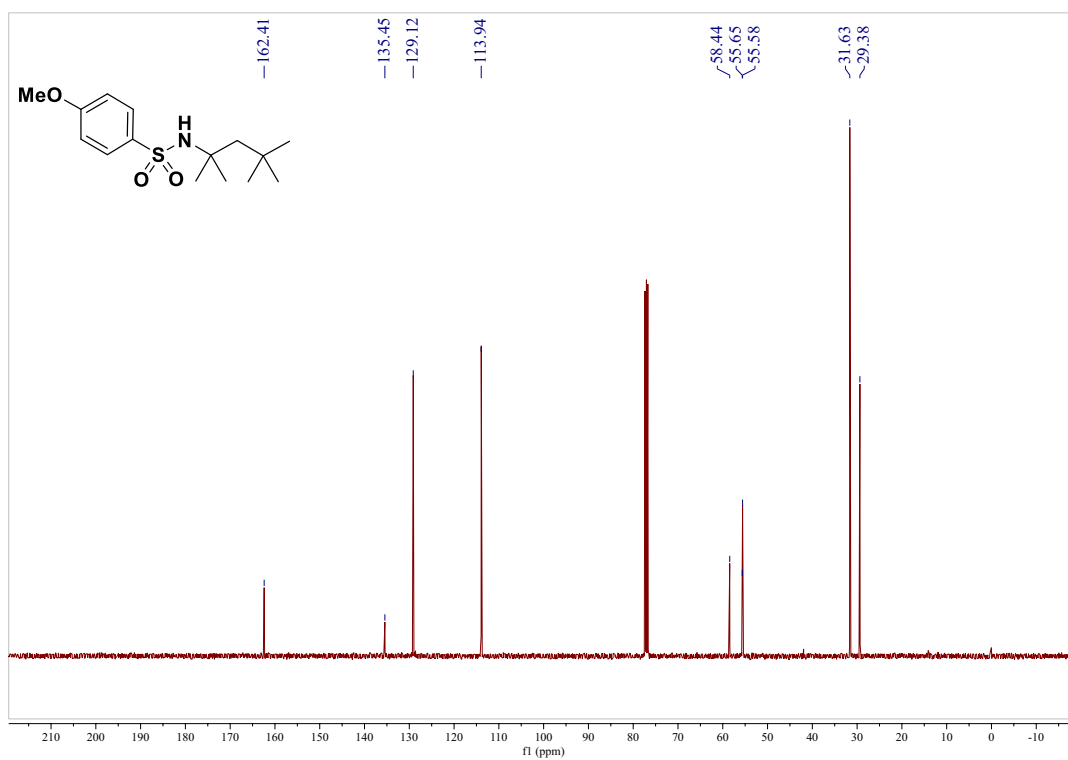

<sup>1</sup>H and <sup>13</sup>C NMR spectra of 4s:

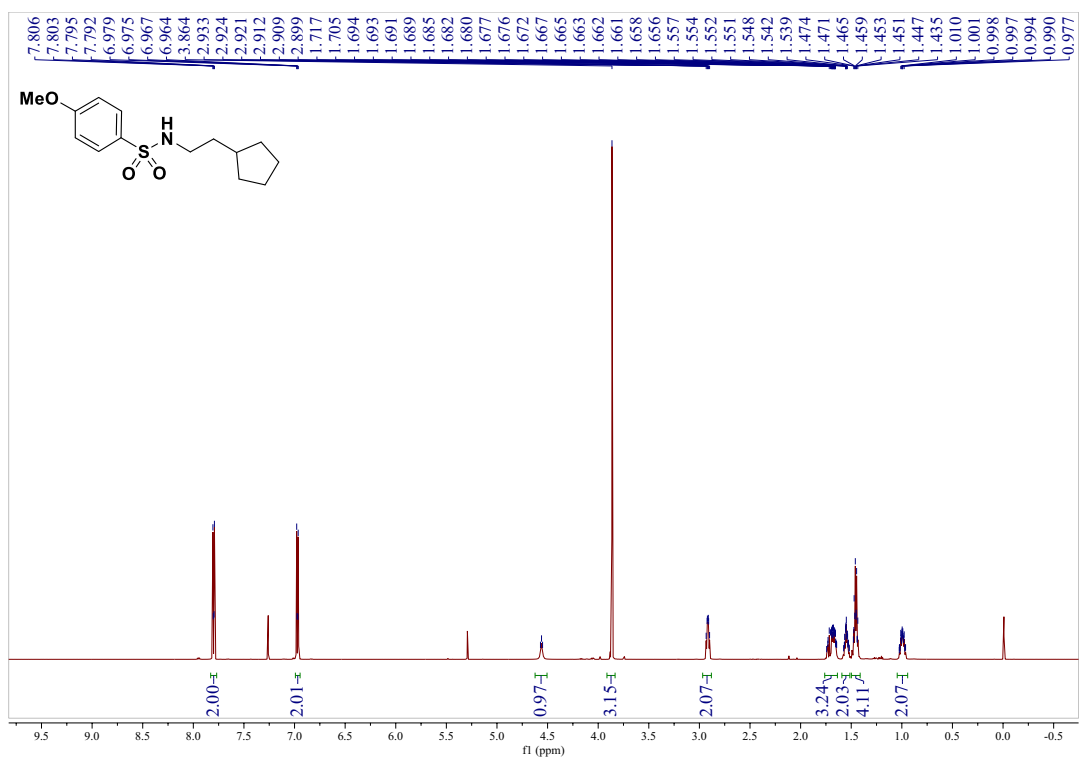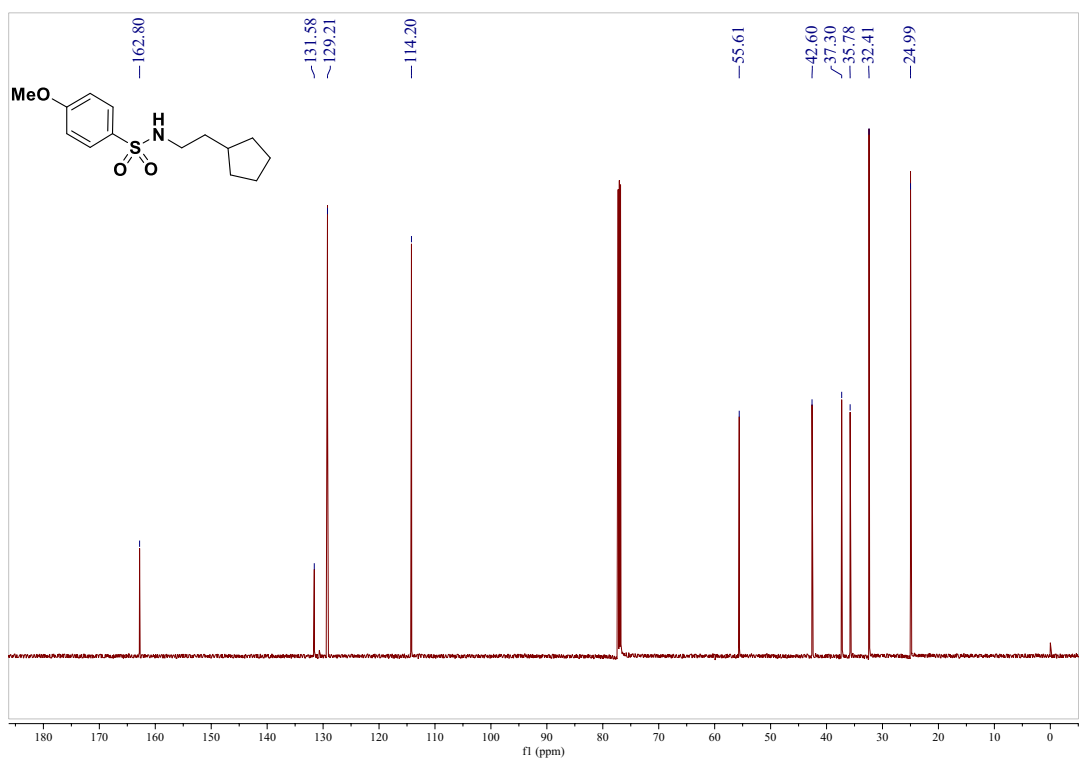

$^1\text{H}$  and  $^{13}\text{C}$  NMR spectra of 4t:

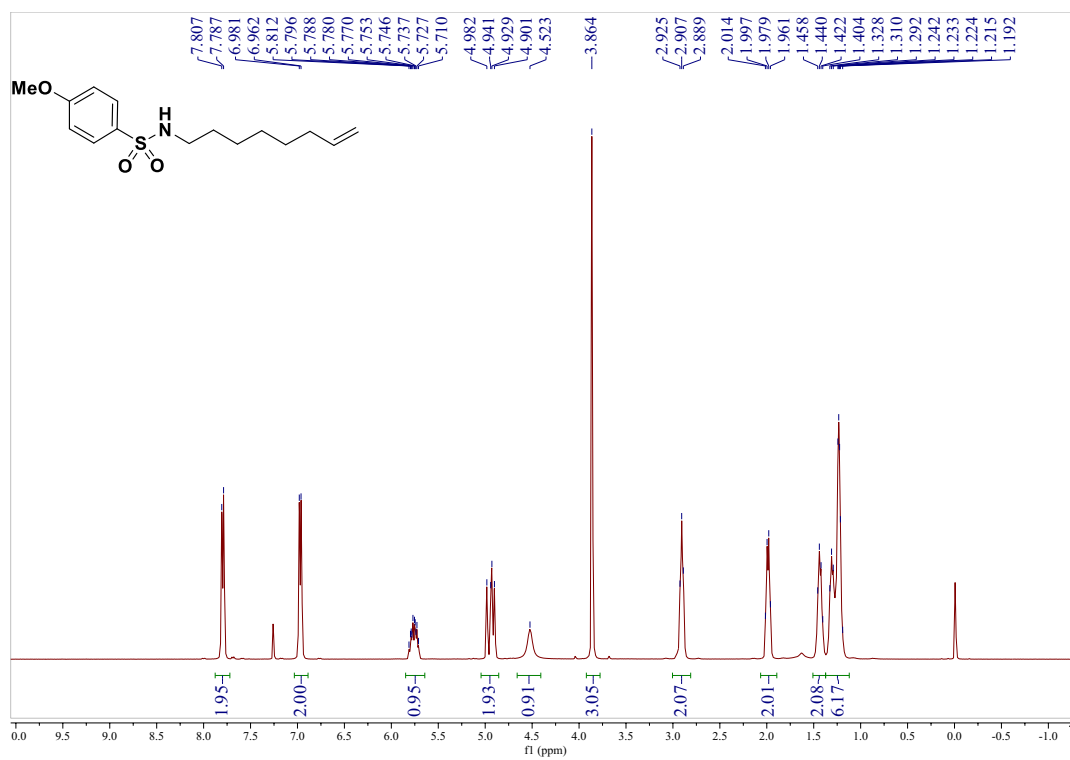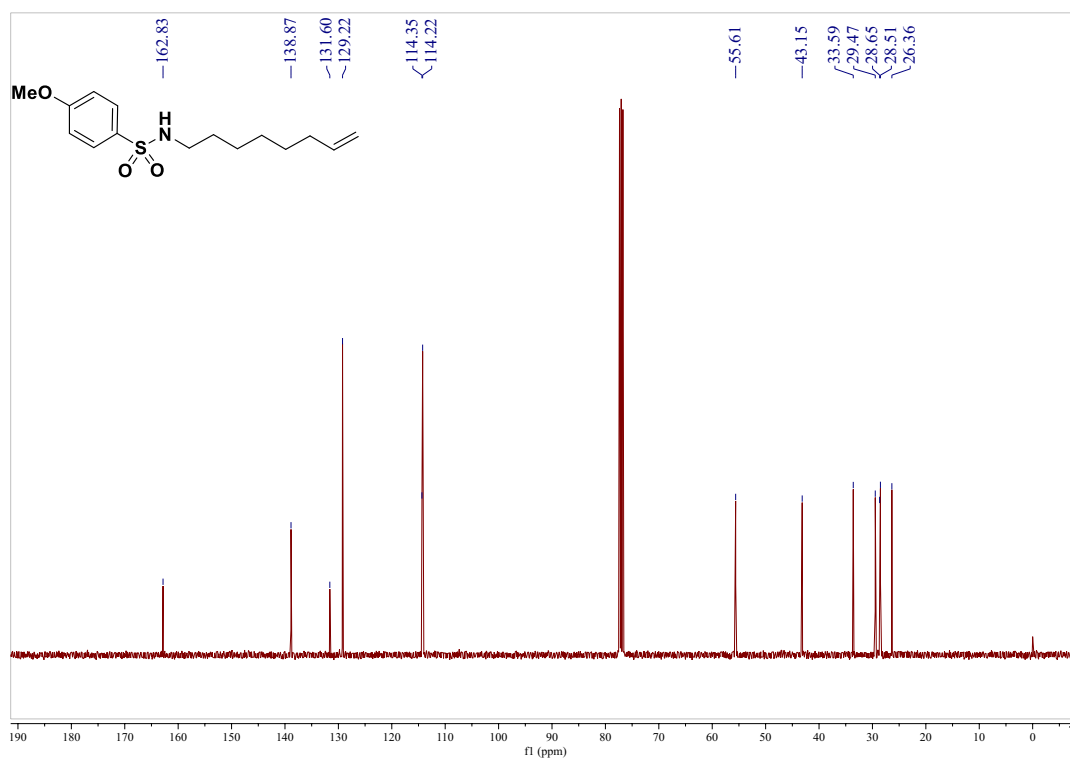

$^1\text{H}$  and  $^{13}\text{C}$  NMR spectra of 4u:

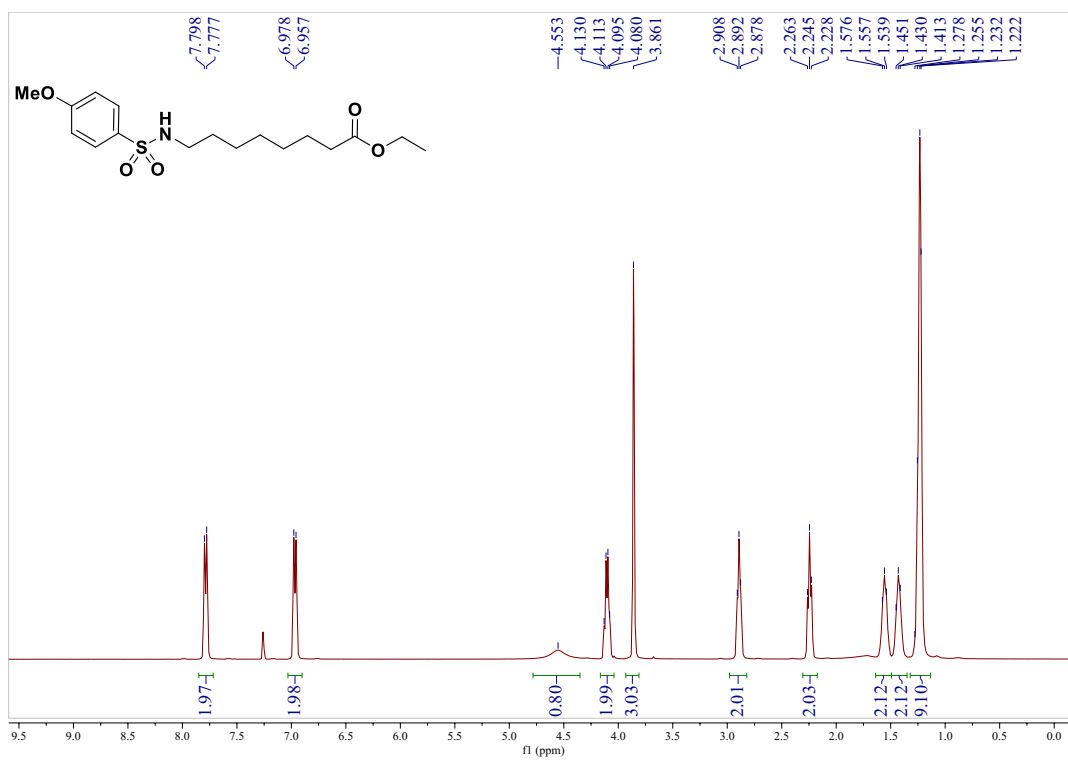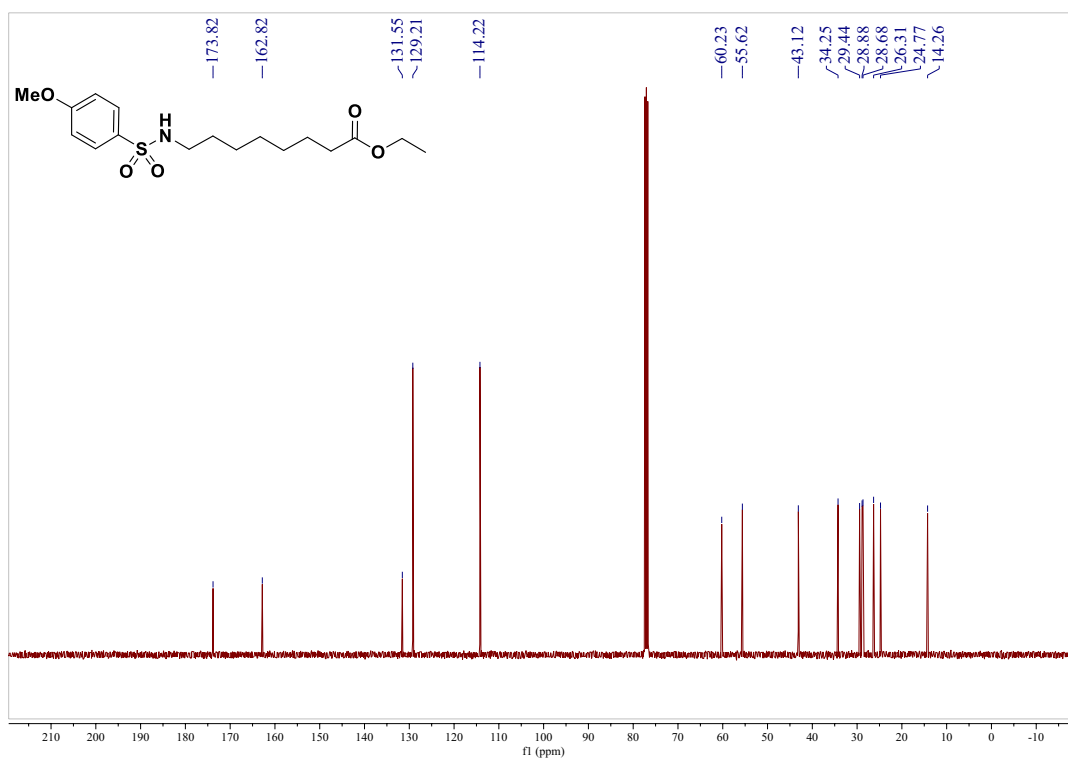

$^1\text{H}$  and  $^{13}\text{C}$  NMR spectra of 4v:

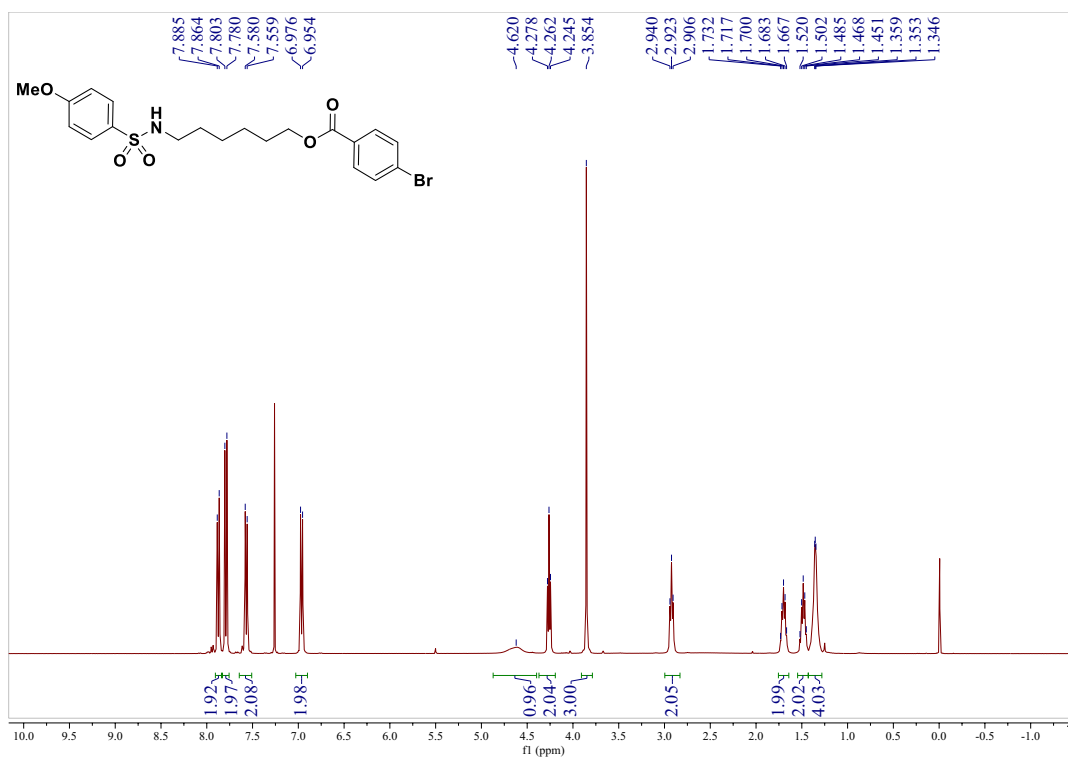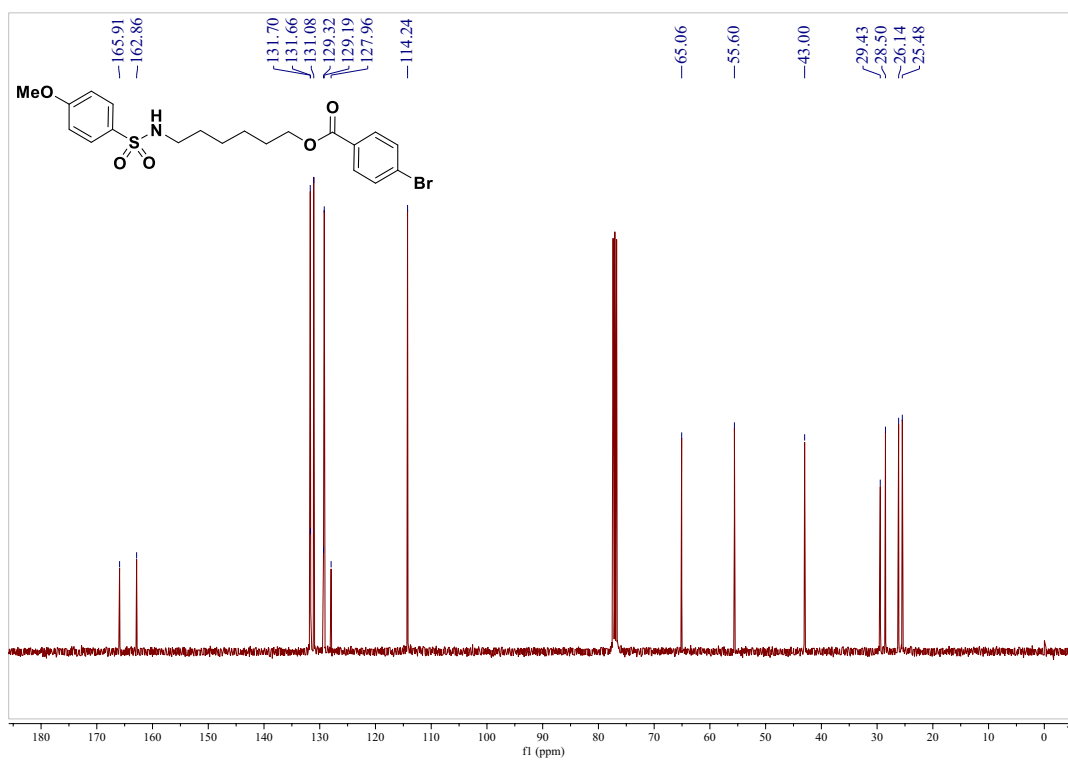

$^1\text{H}$  and  $^{13}\text{C}$  NMR spectra of 4w:

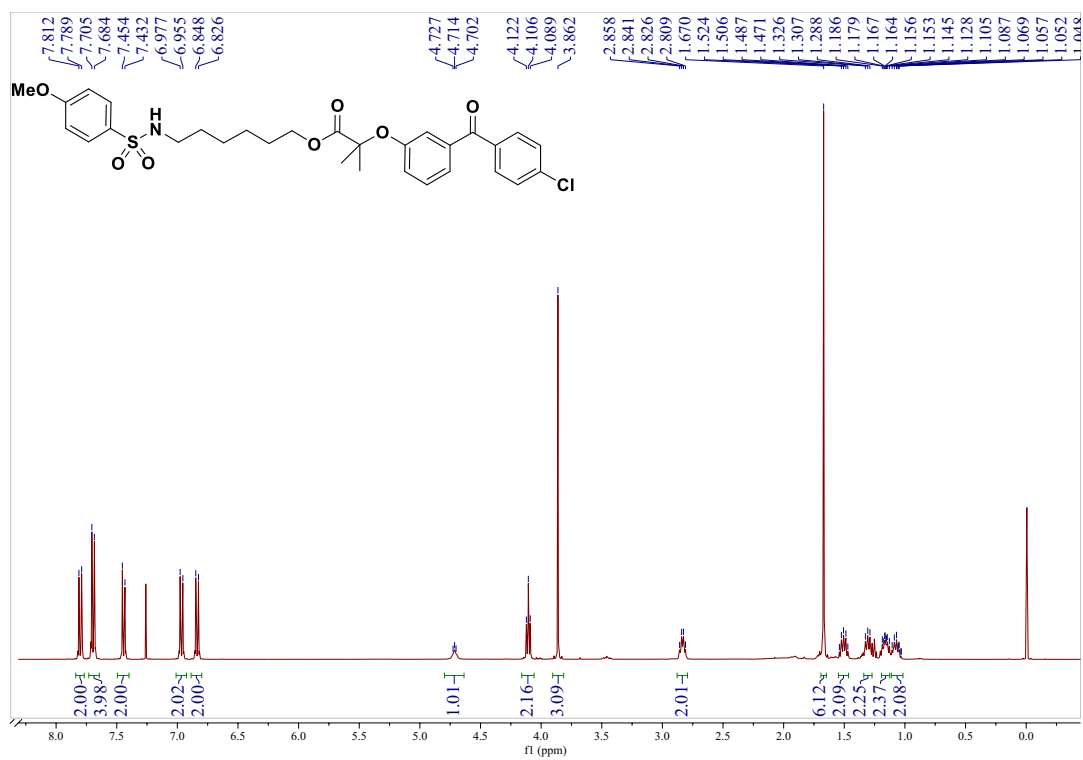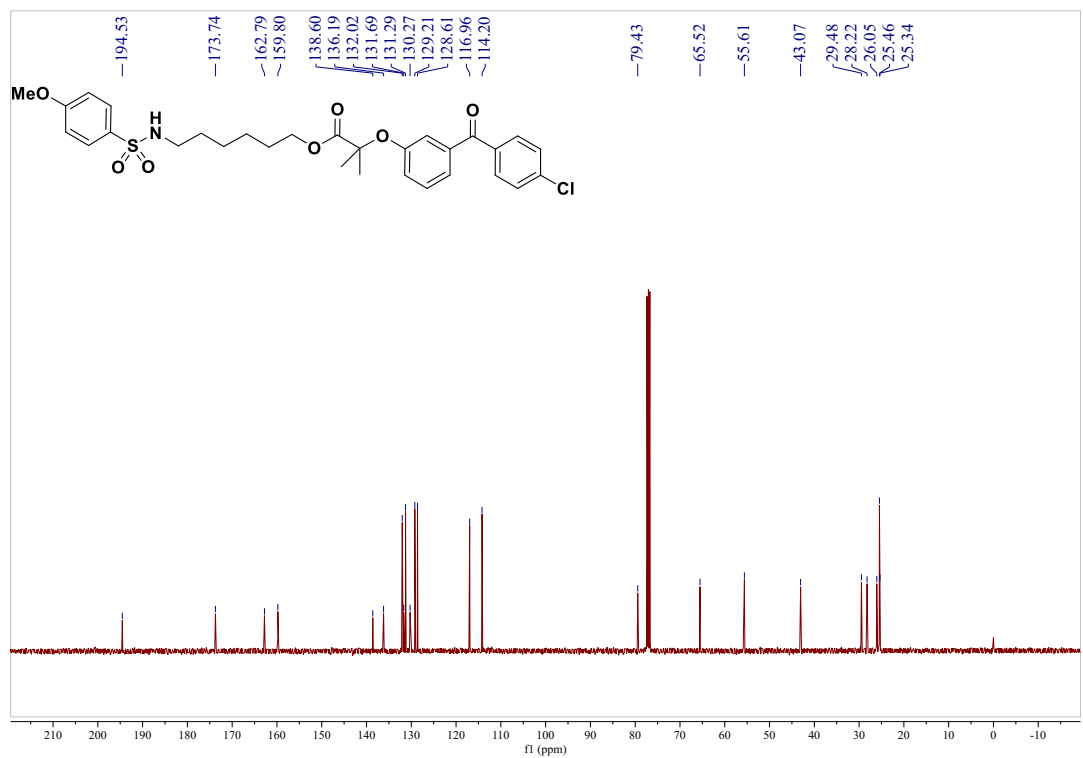

$^1\text{H}$  and  $^{13}\text{C}$  NMR spectra of **3aa**:

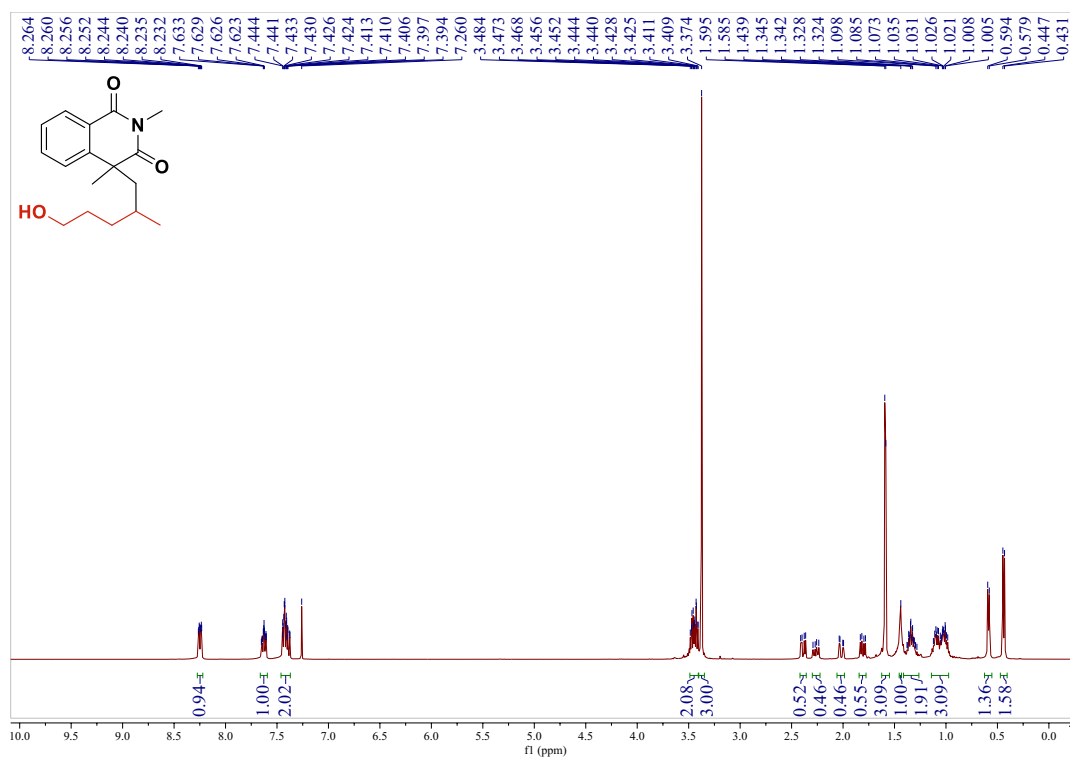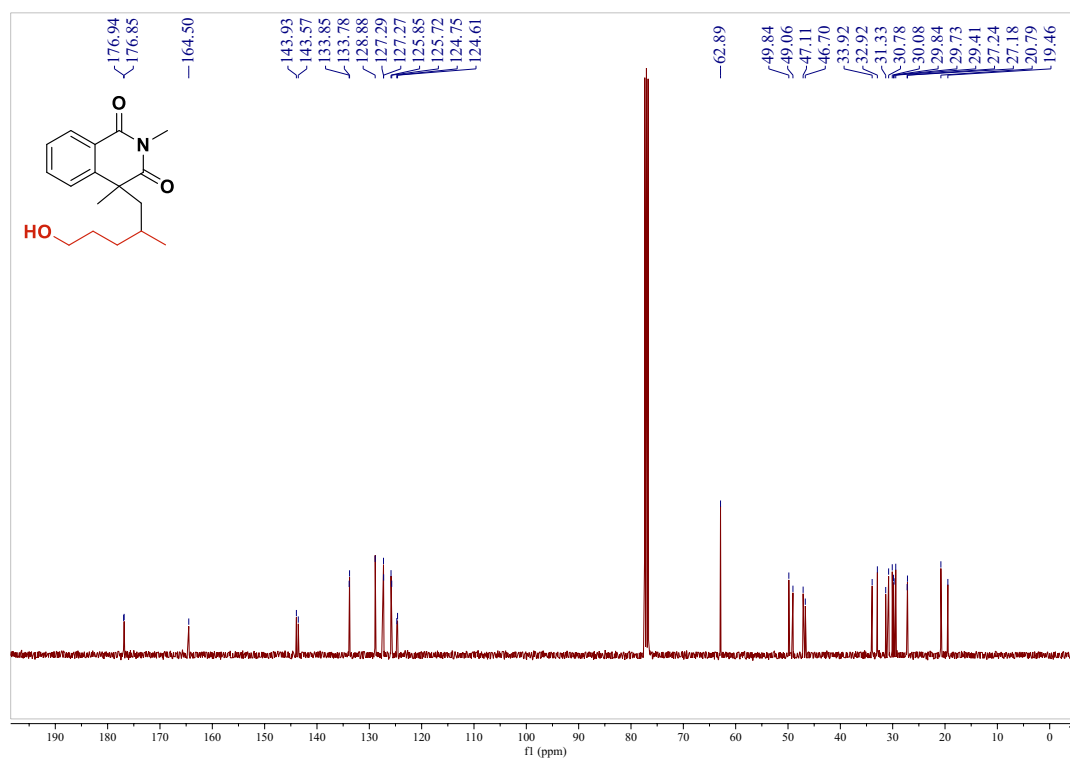

$^1\text{H}$  and  $^{13}\text{C}$  NMR spectra of **3ba**:

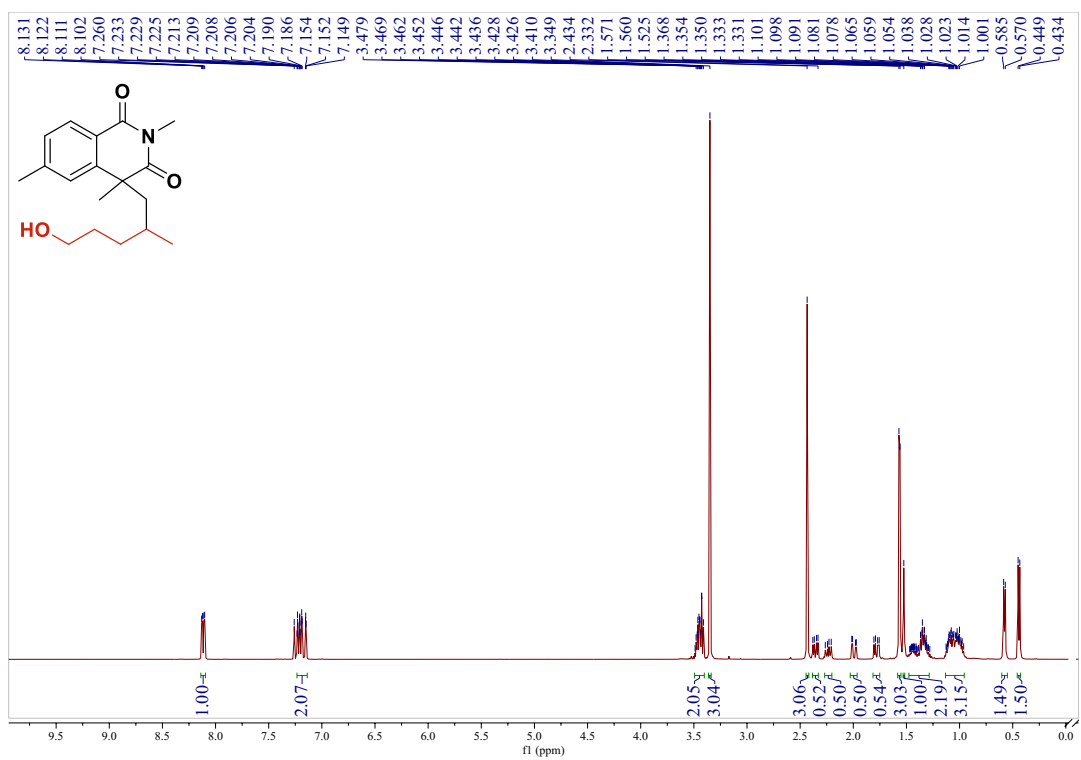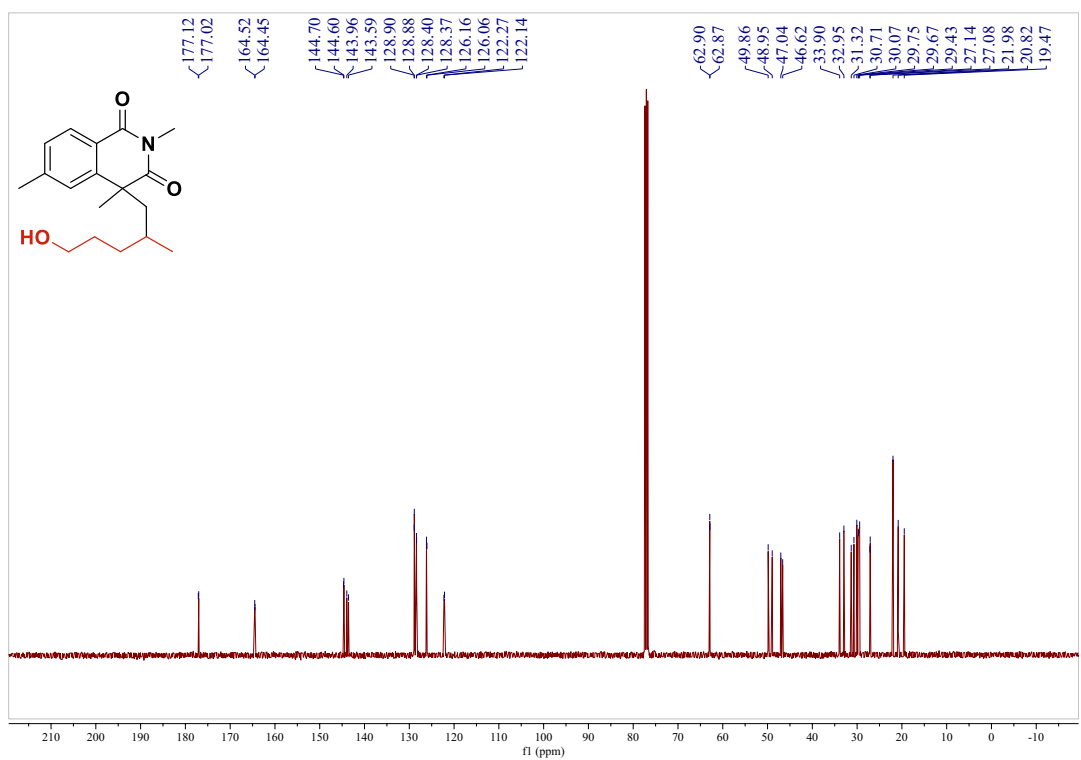



$^1\text{H}$  and  $^{13}\text{C}$  NMR spectra of **3ca**:

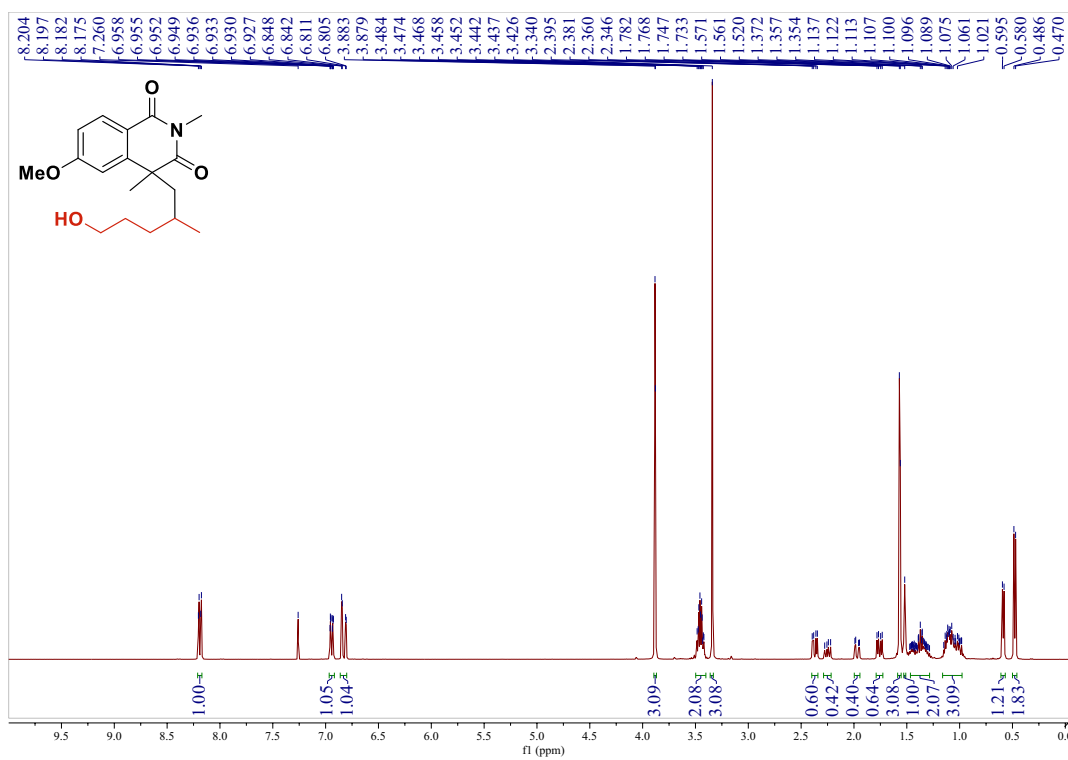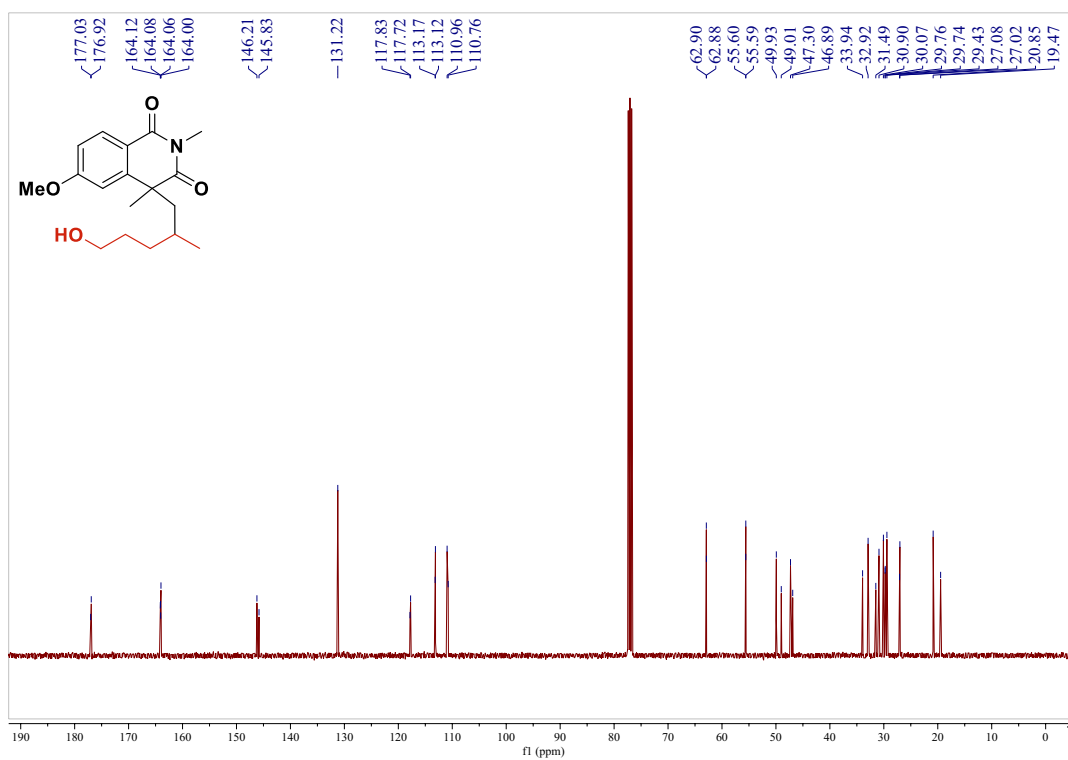

$^1\text{H}$  and  $^{13}\text{C}$  NMR spectra of **3da**:

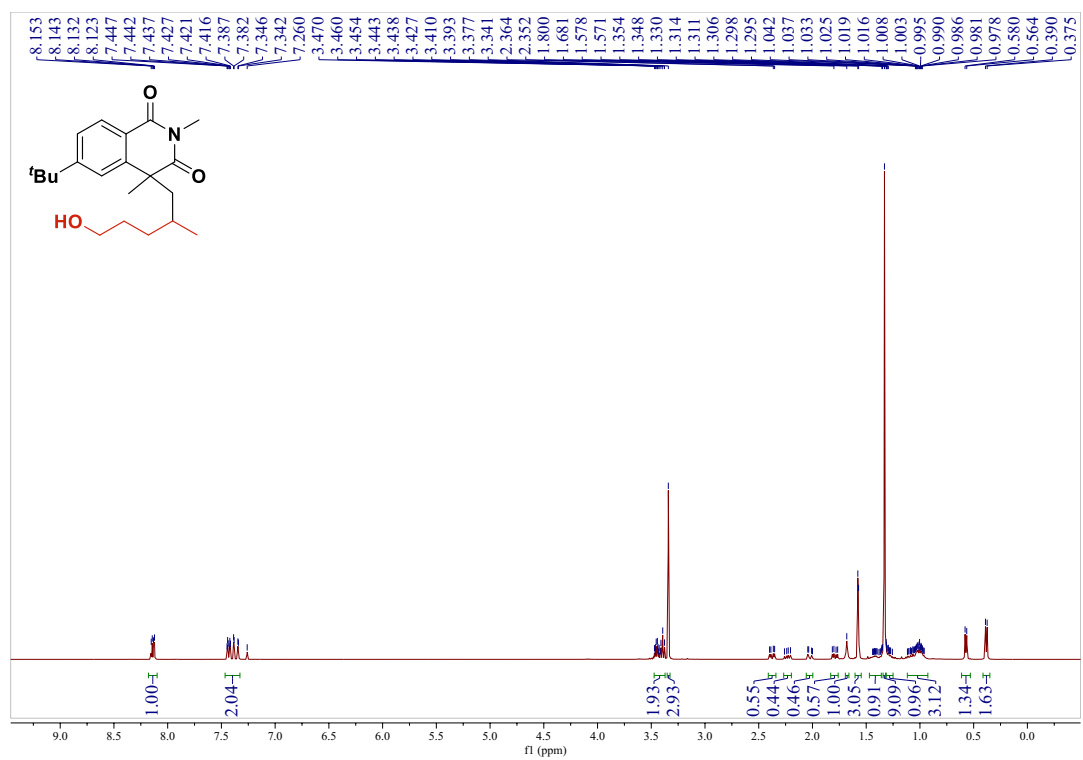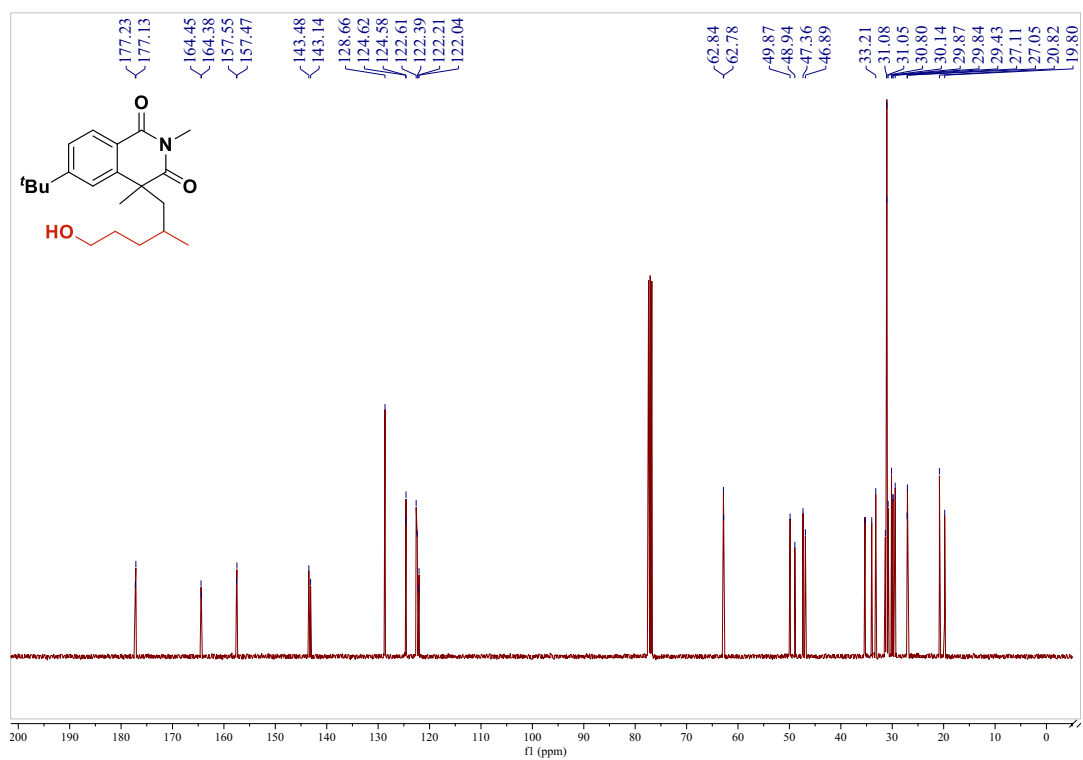

$^1\text{H}$  and  $^{13}\text{C}$  NMR spectra of **3ea**:

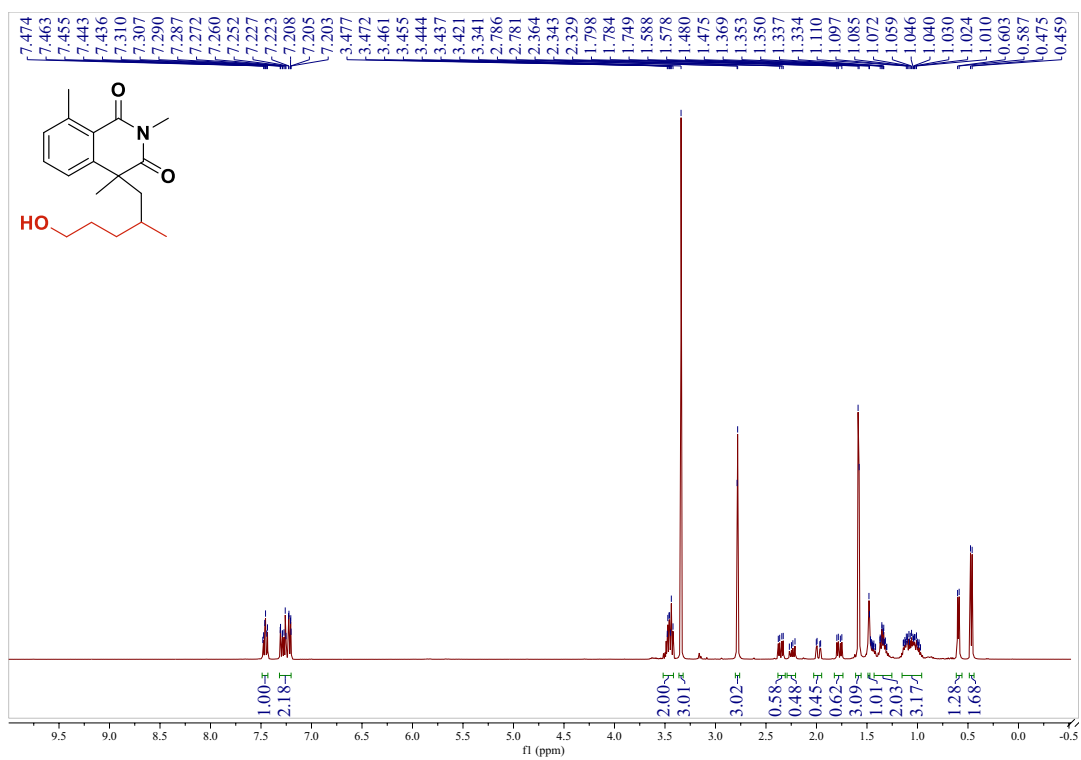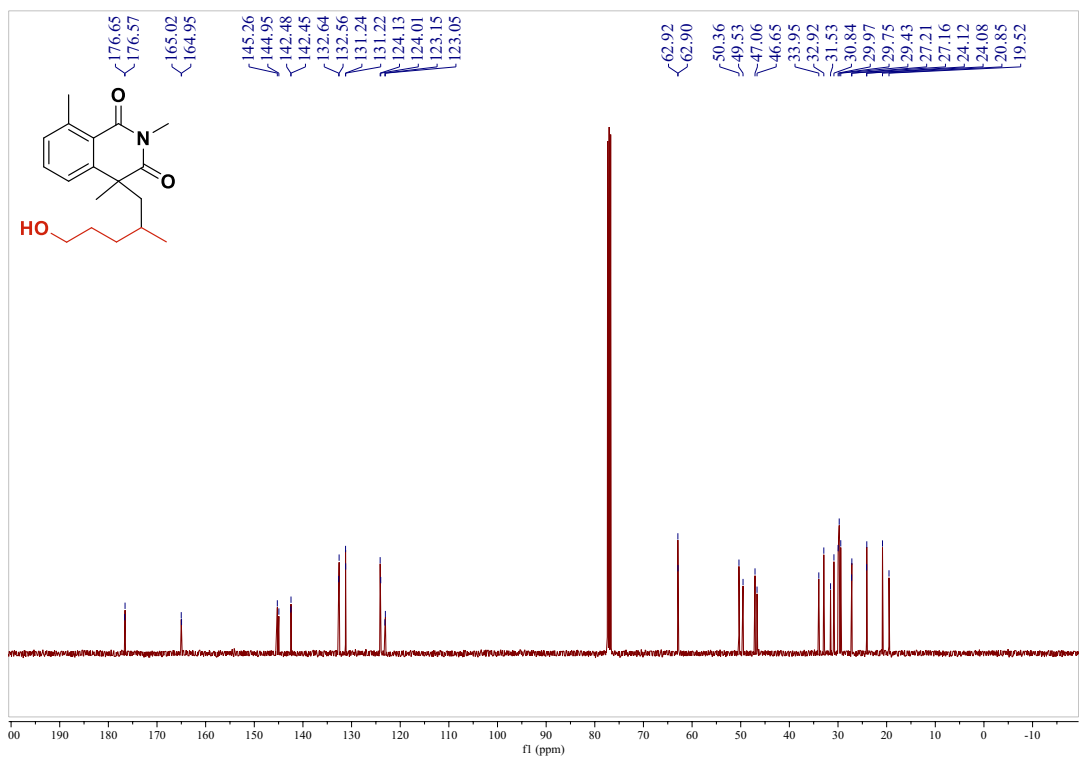

$^1\text{H}$  and  $^{13}\text{C}$  NMR spectra of 3fa:

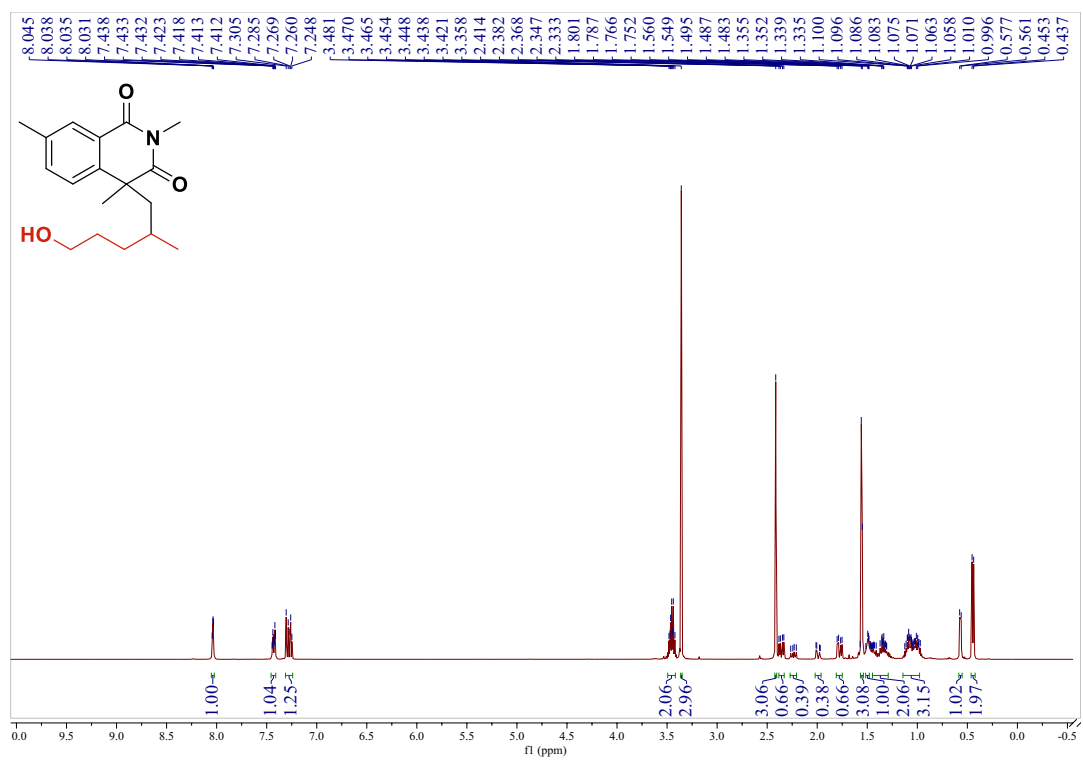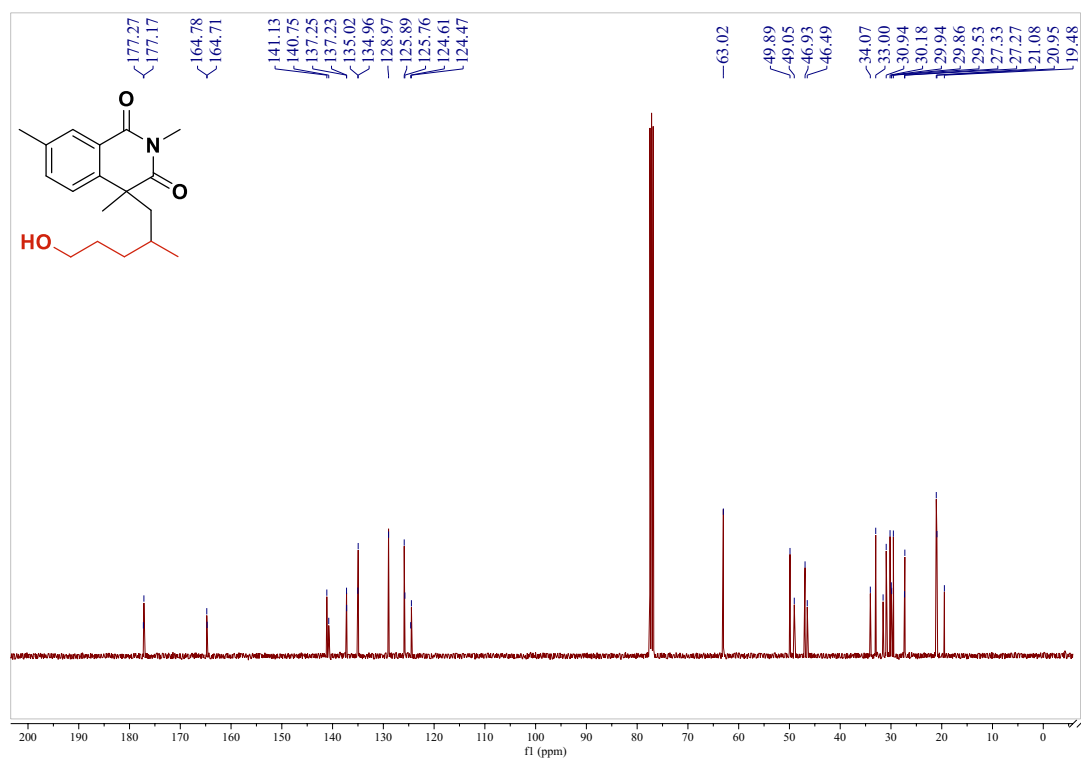

$^1\text{H}$   $^{19}\text{F}$  and  $^{13}\text{C}$  NMR spectra of **3ga**:

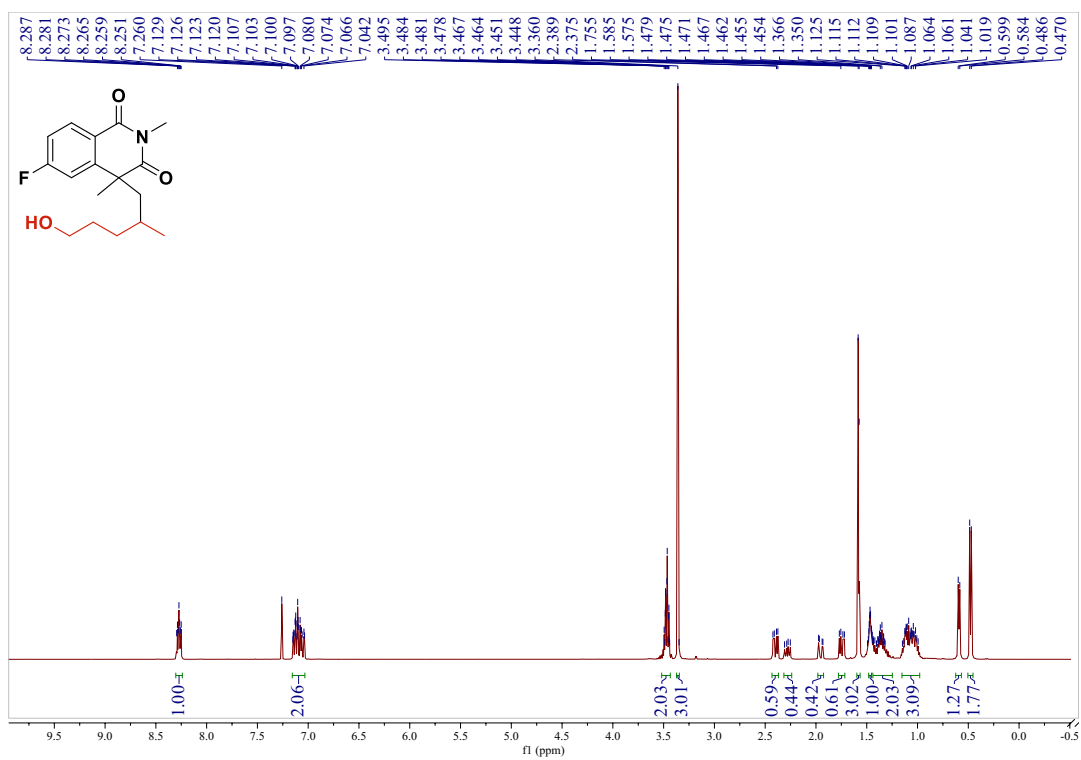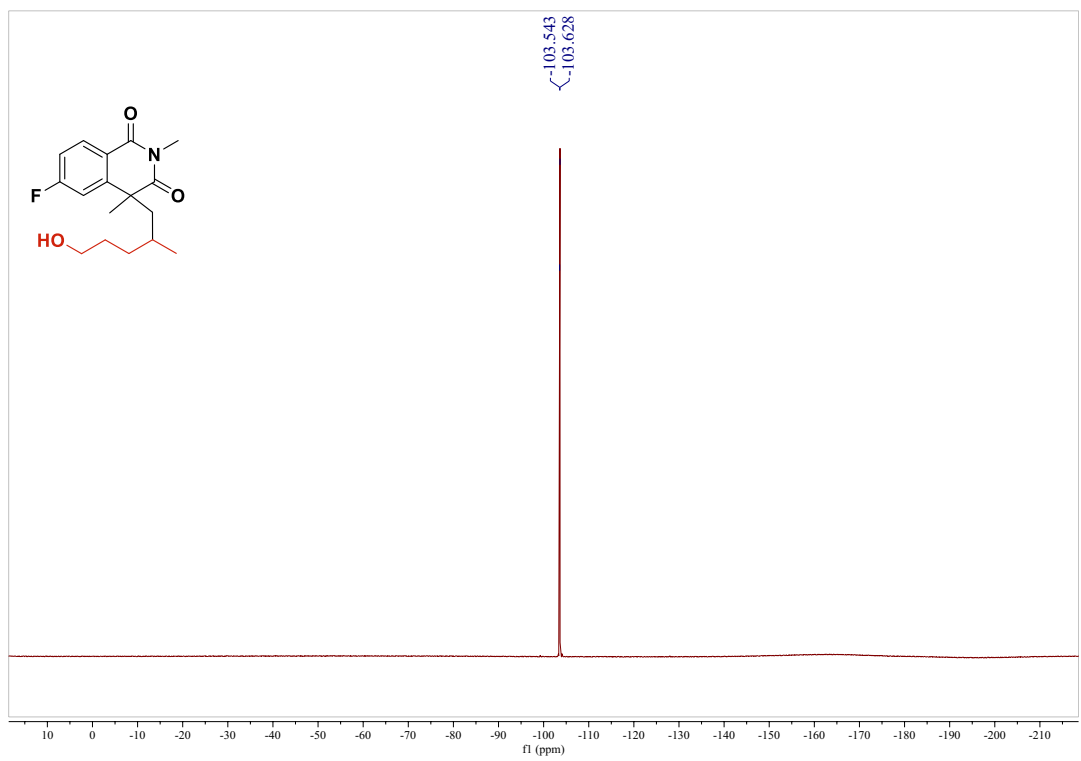

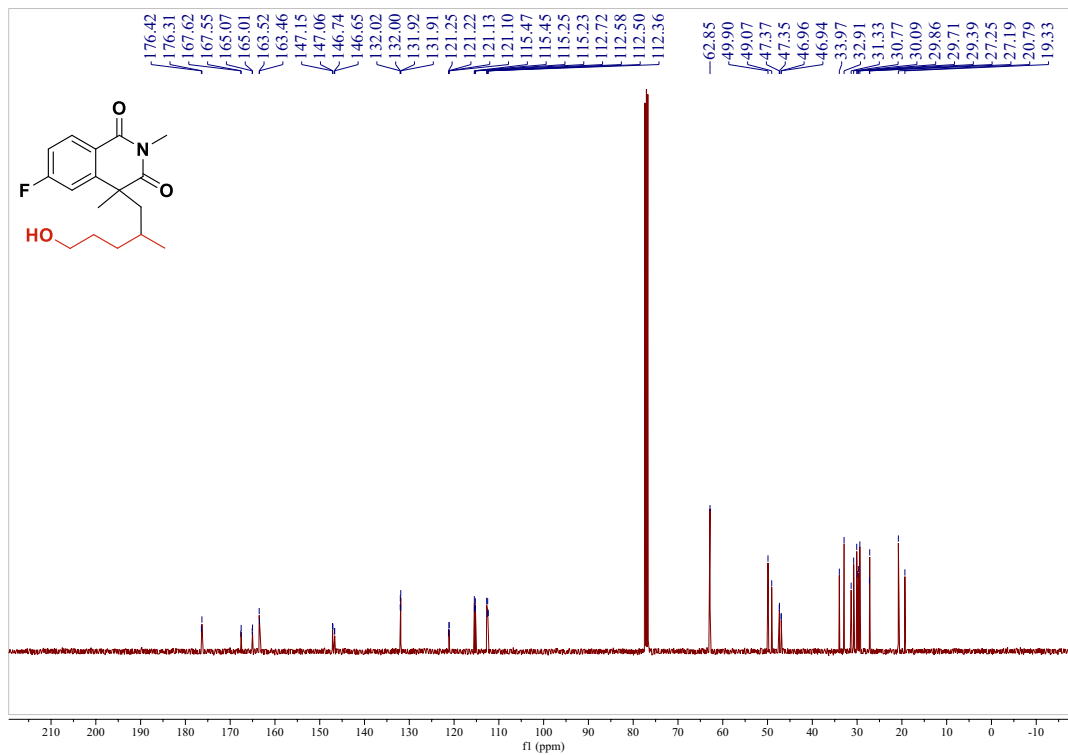

$^1\text{H}$  and  $^{13}\text{C}$  NMR spectra of **3ha**:

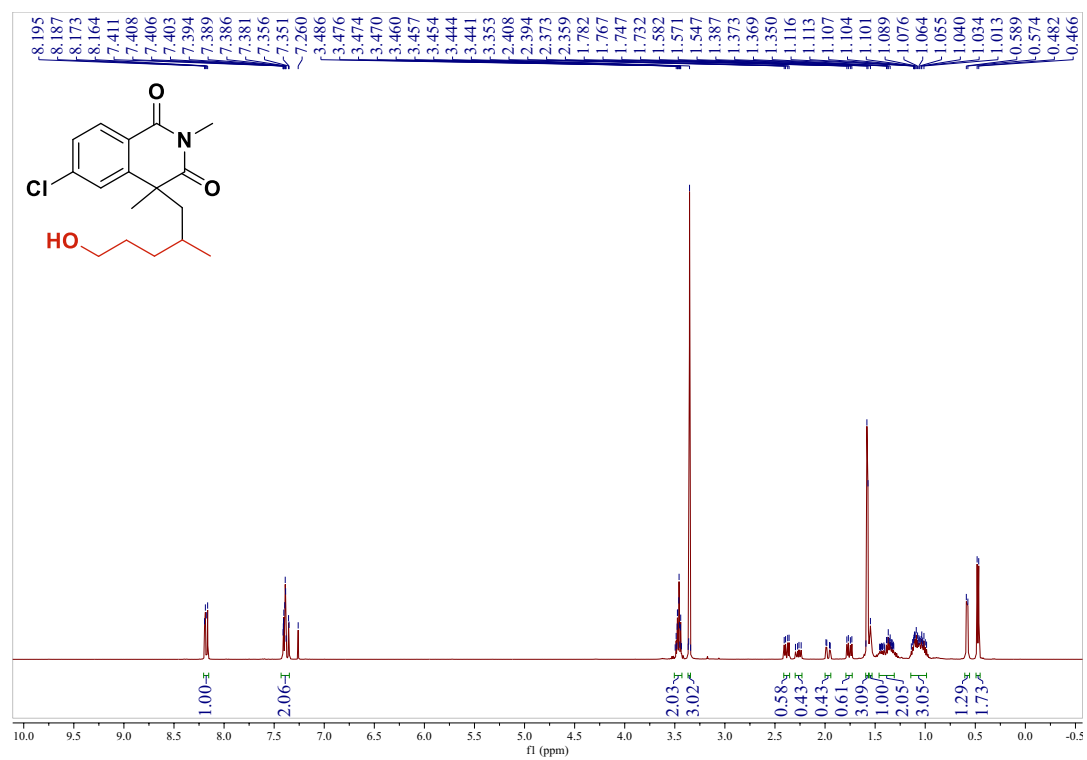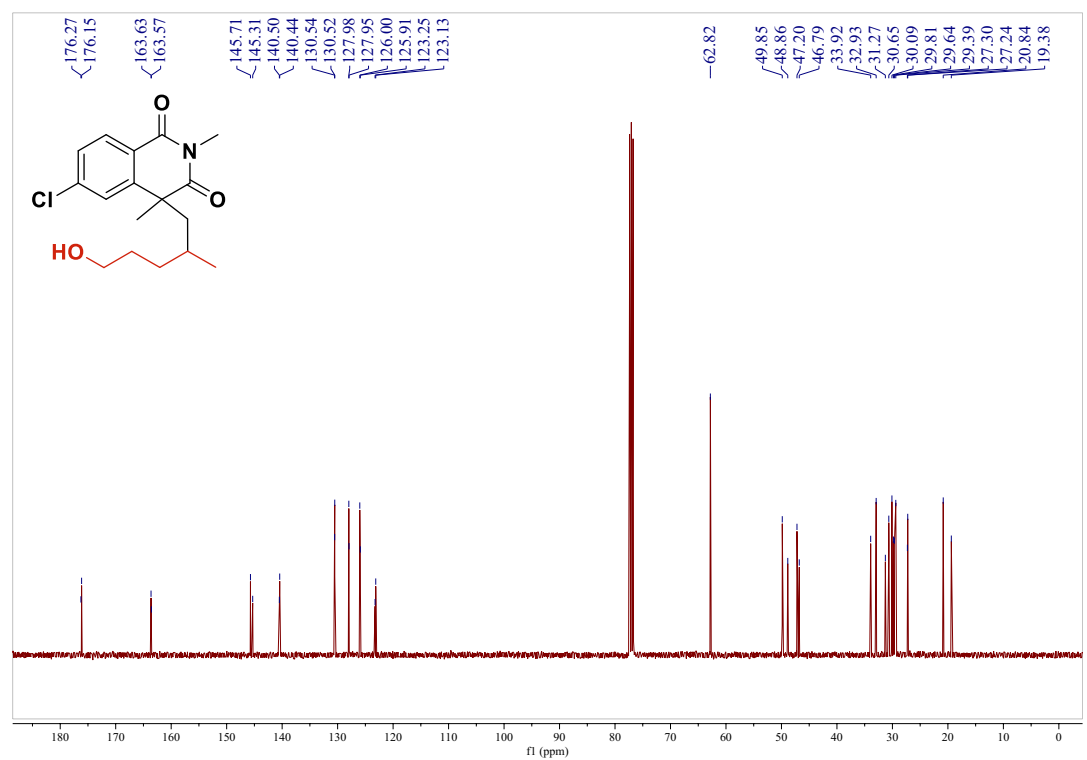

$^1\text{H}$   $^{19}\text{F}$  and  $^{13}\text{C}$  NMR spectra of **3ia**:

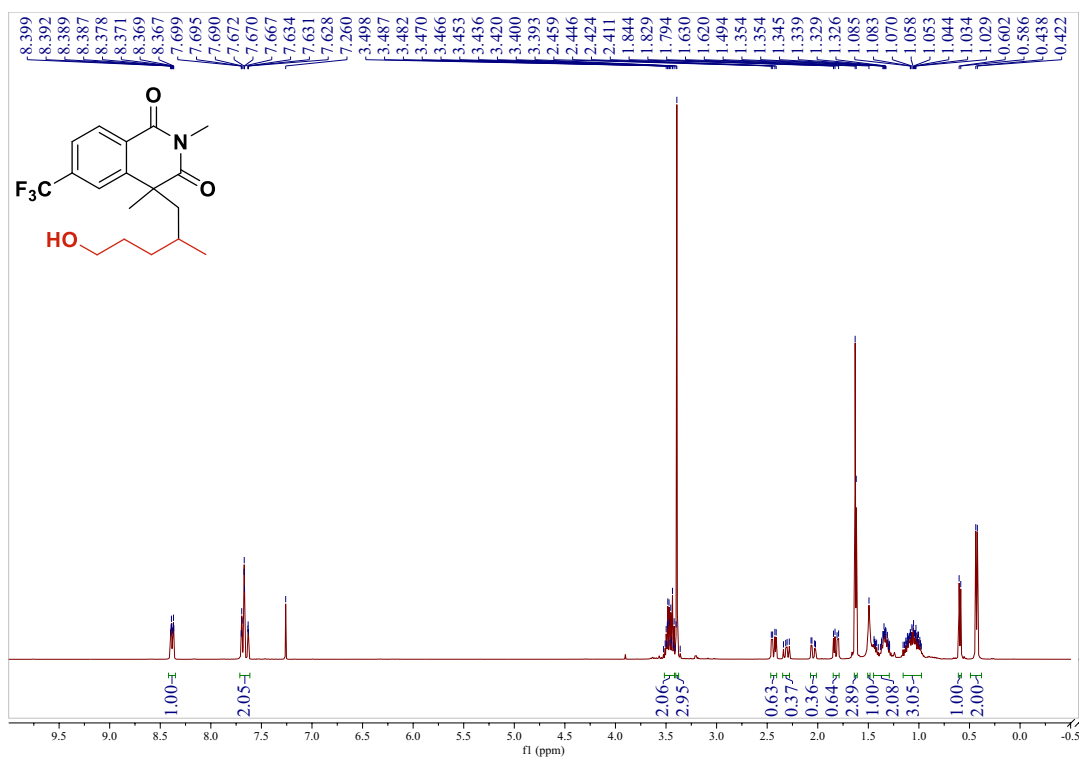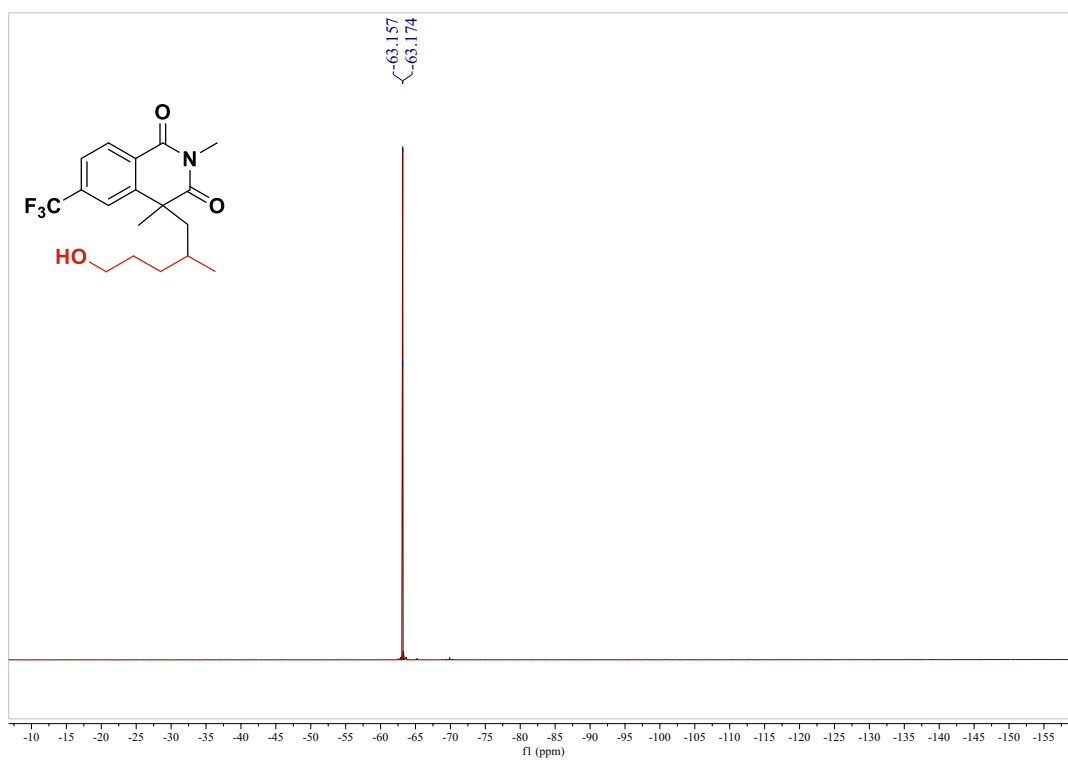



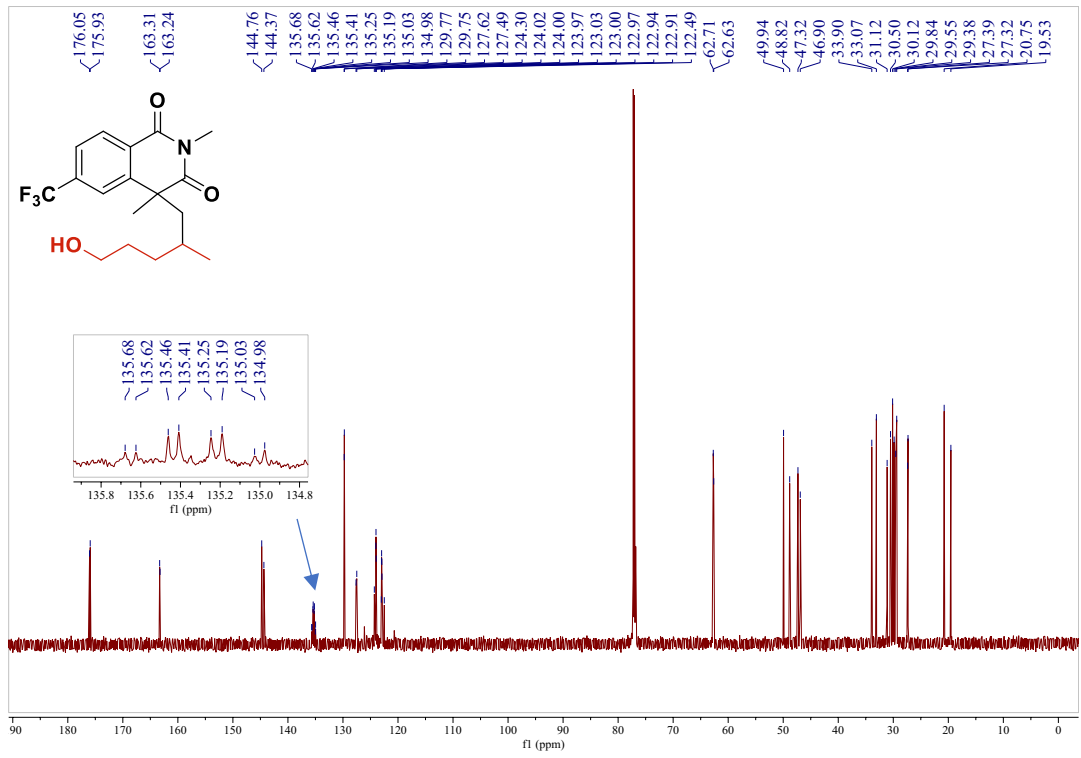

$^1\text{H}$  and  $^{13}\text{C}$  NMR spectra of **3ja**:

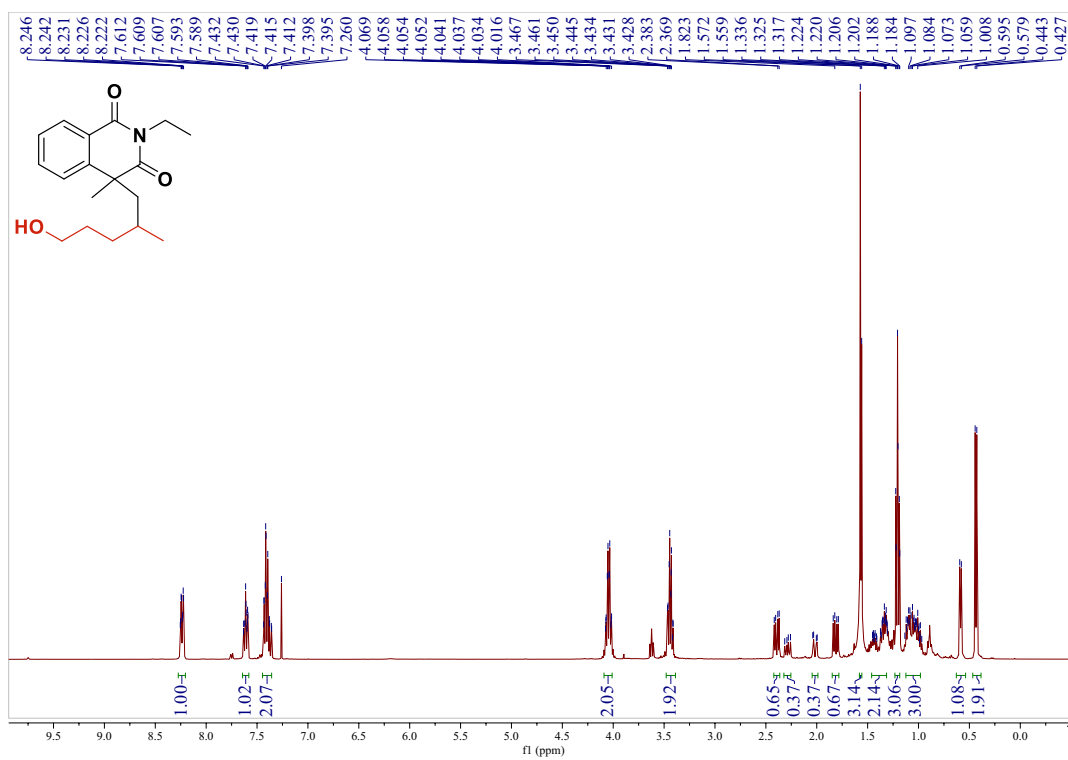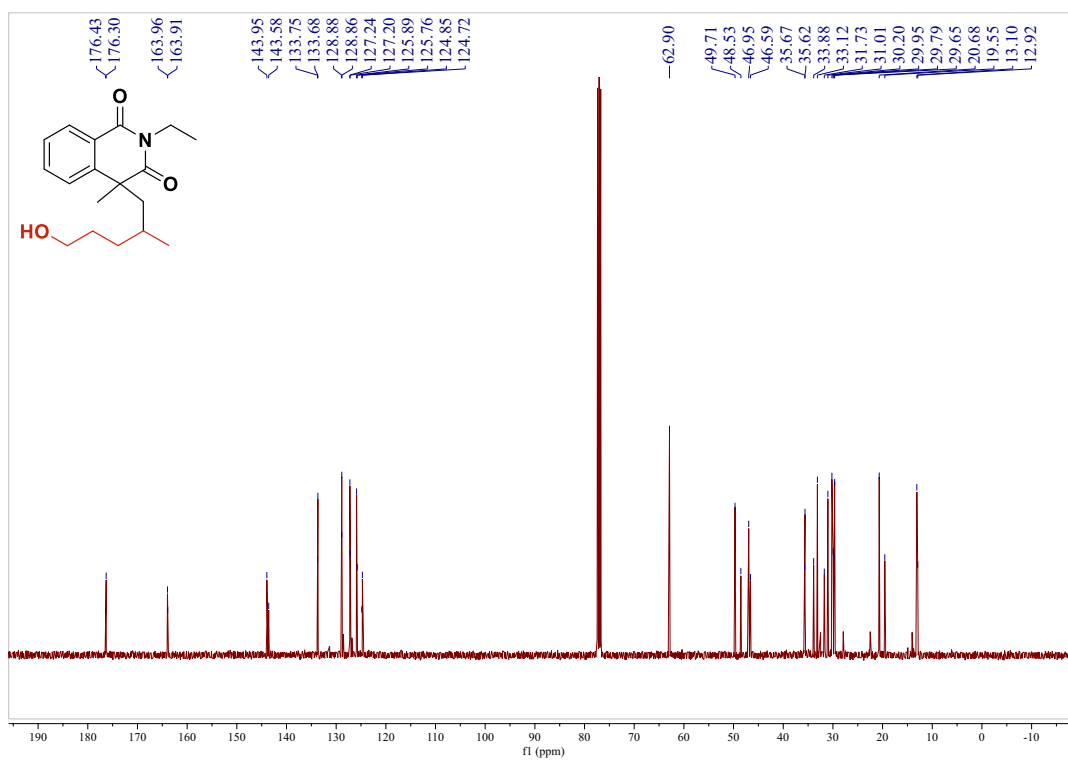

$^1\text{H}$  and  $^{13}\text{C}$  NMR spectra of **3ka**:

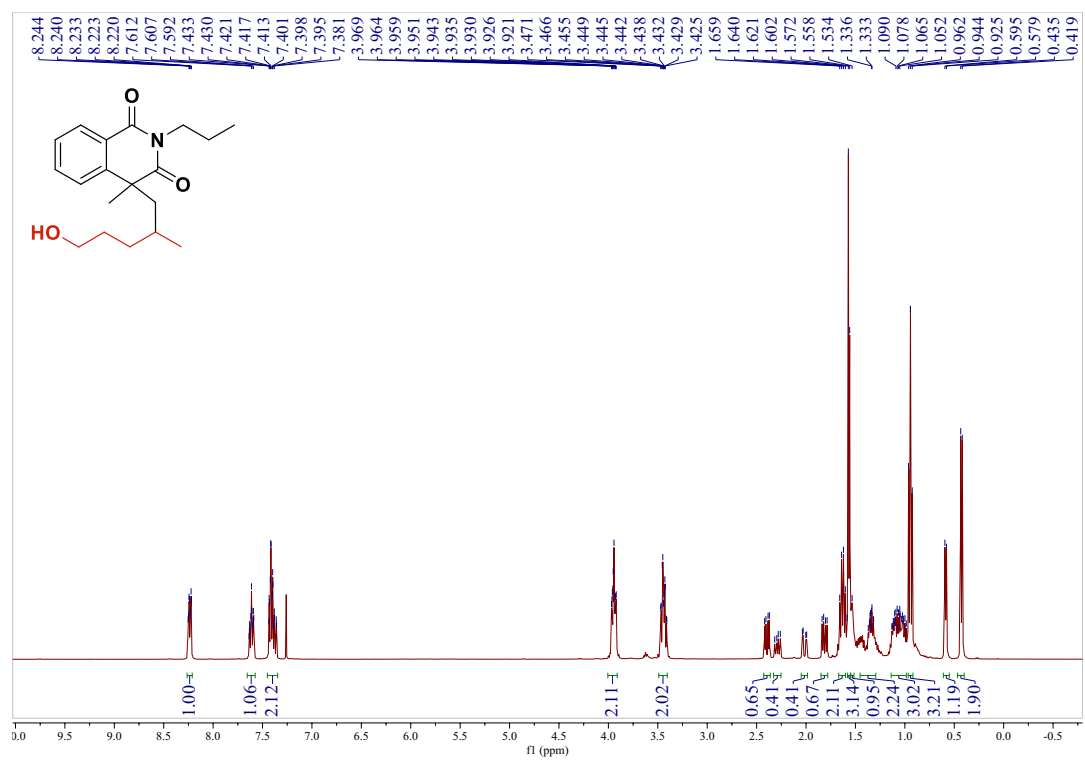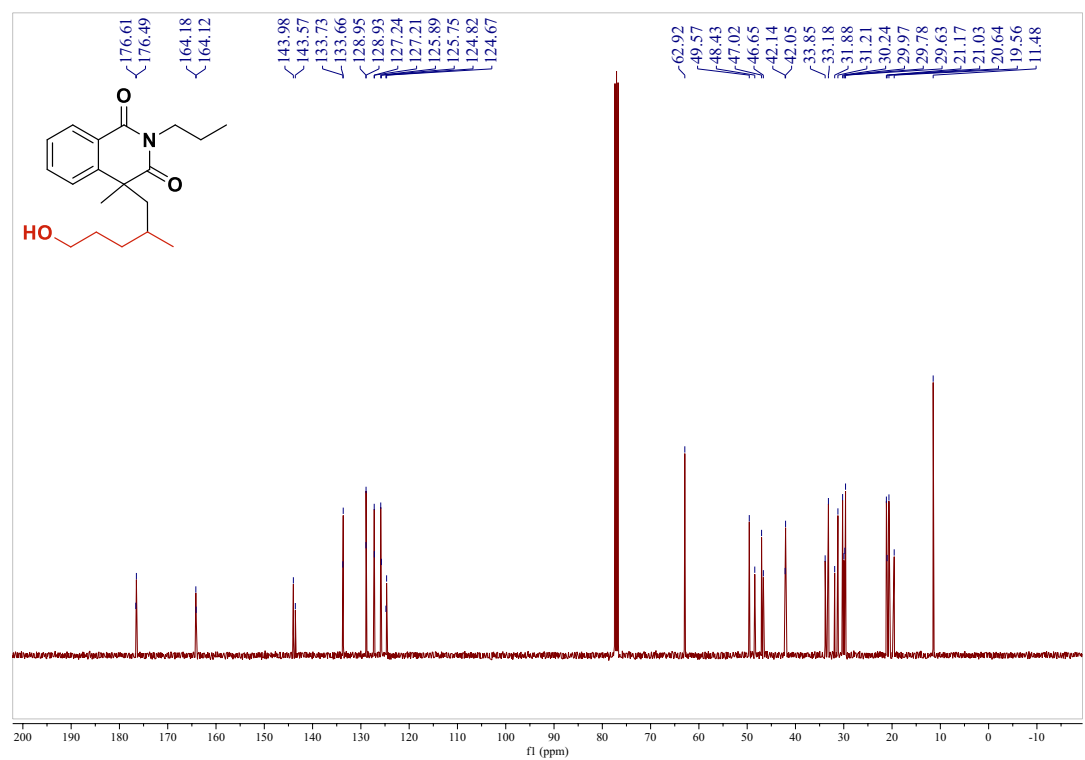

$^1\text{H}$  and  $^{13}\text{C}$  NMR spectra of 31a:

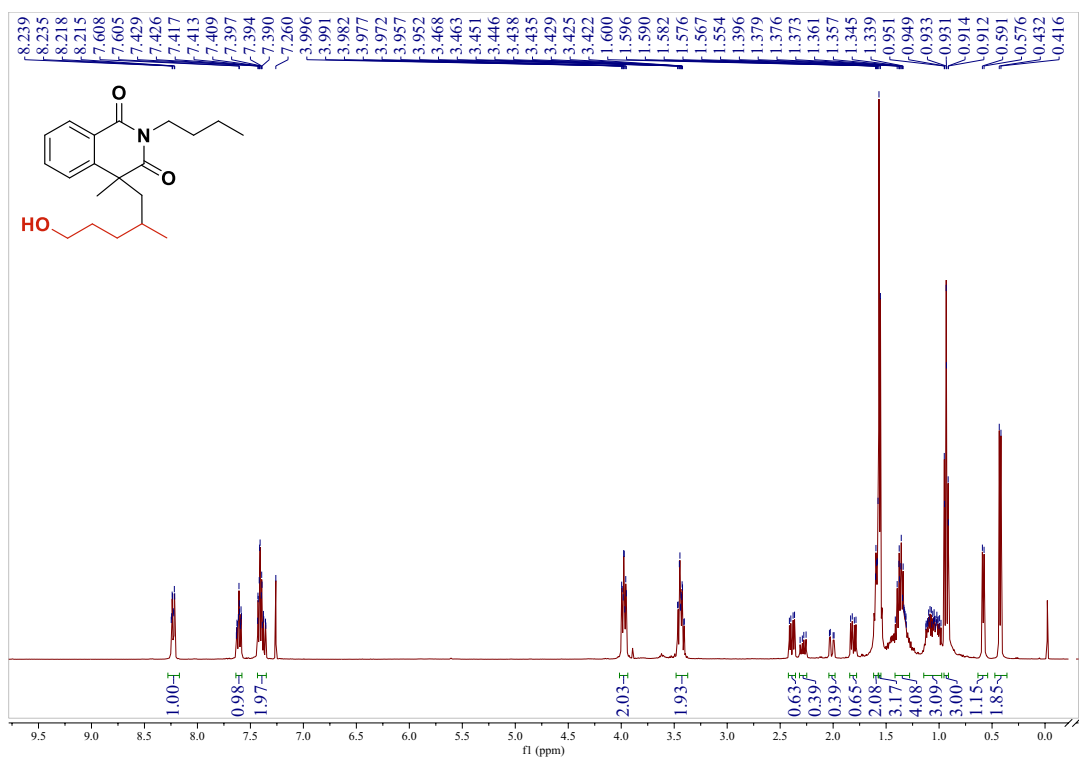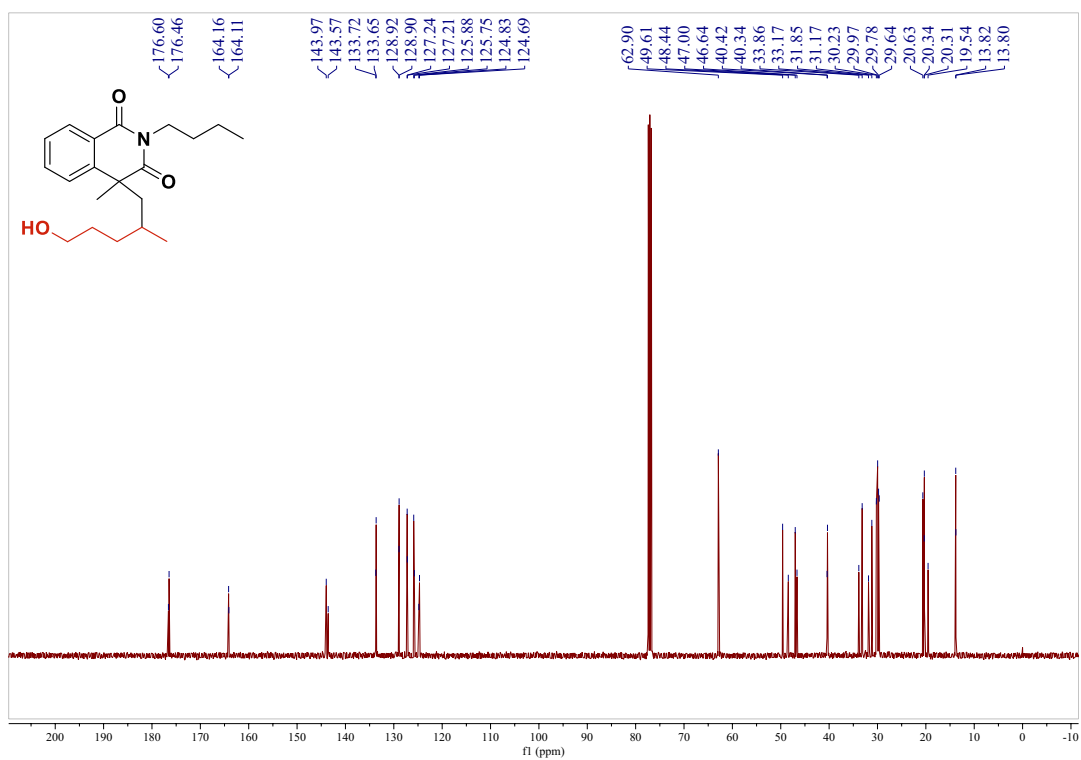

$^1\text{H}$  and  $^{13}\text{C}$  NMR spectra of **3ma**:

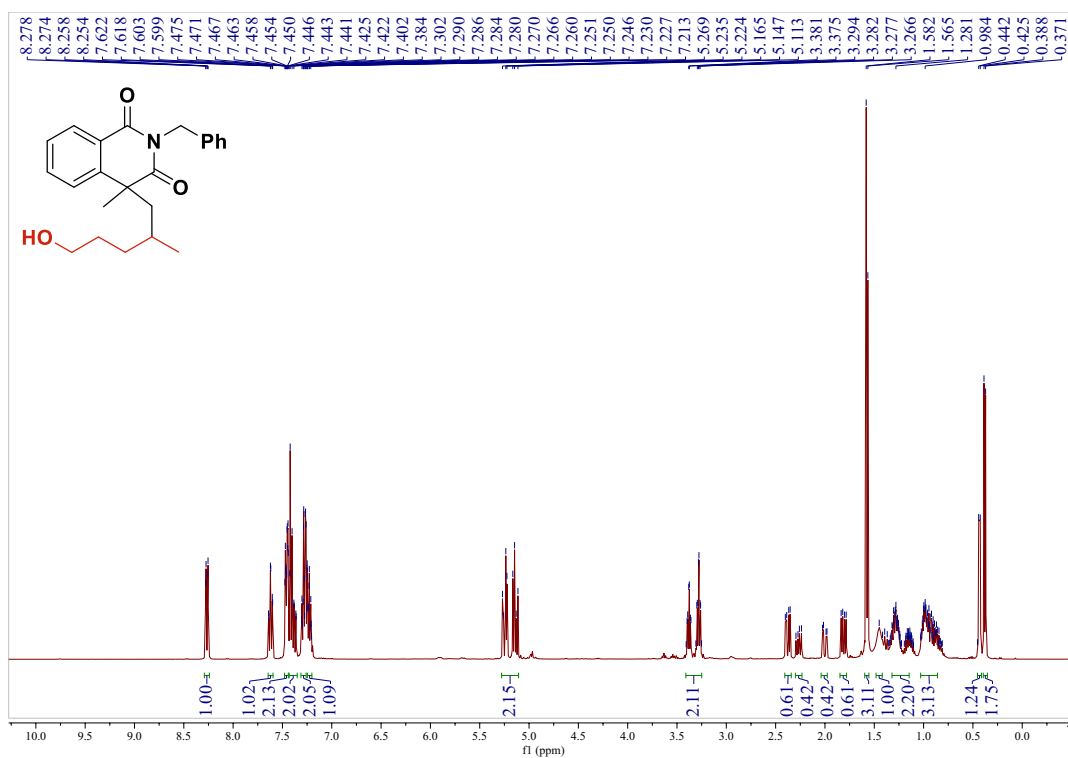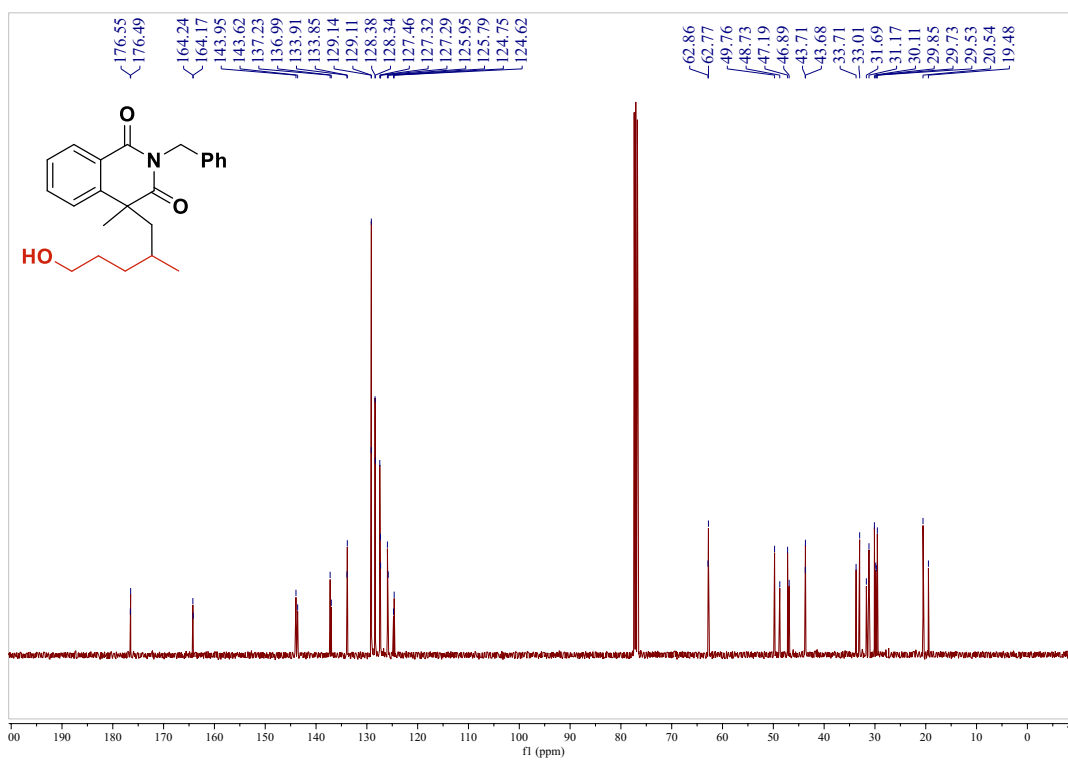

$^1\text{H}$  and  $^{13}\text{C}$  NMR spectra of **3ab**:

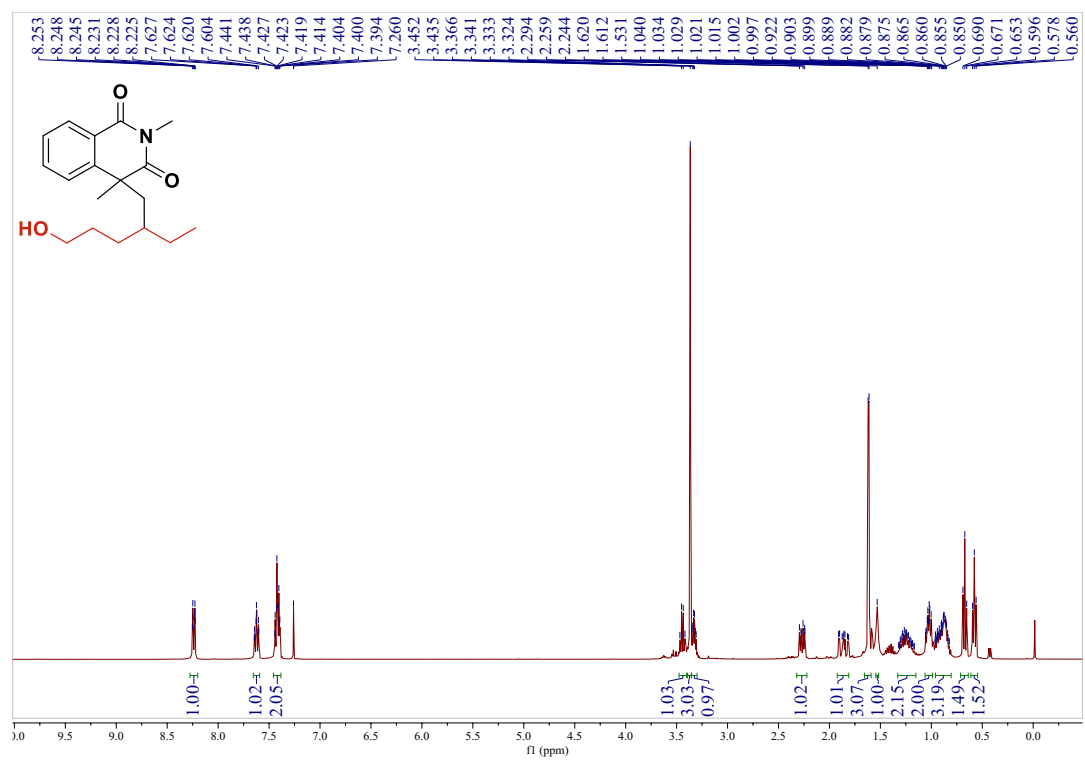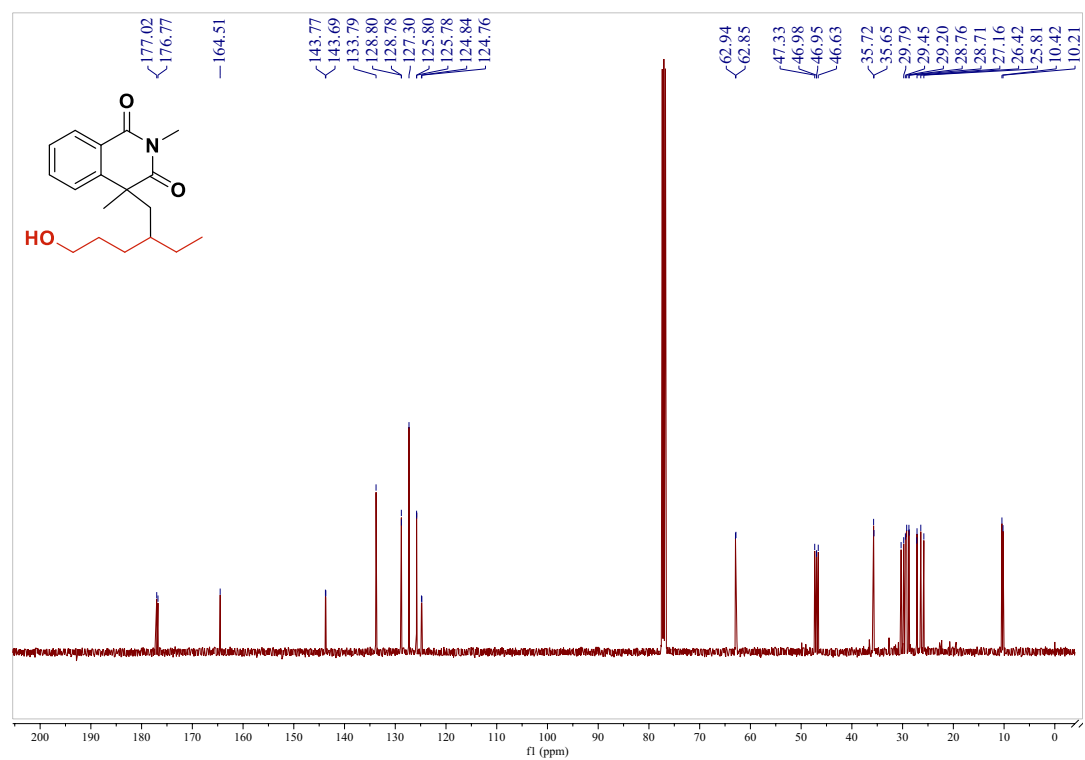

$^1\text{H}$  and  $^{13}\text{C}$  NMR spectra of **3ac**:

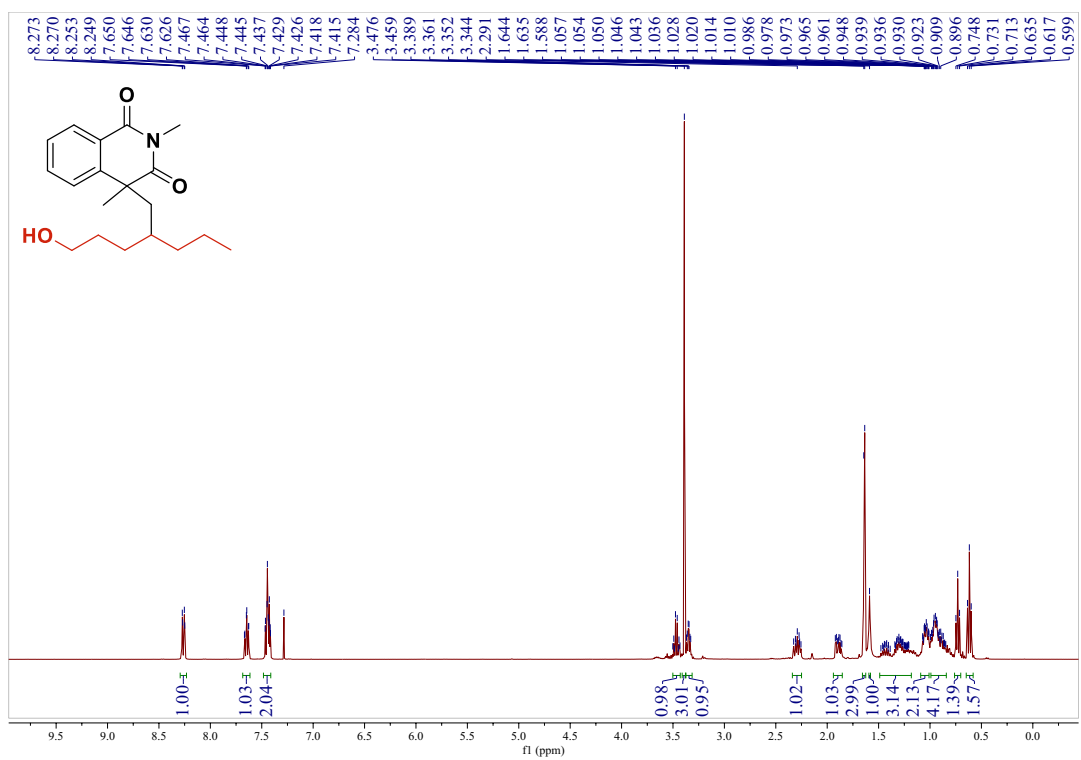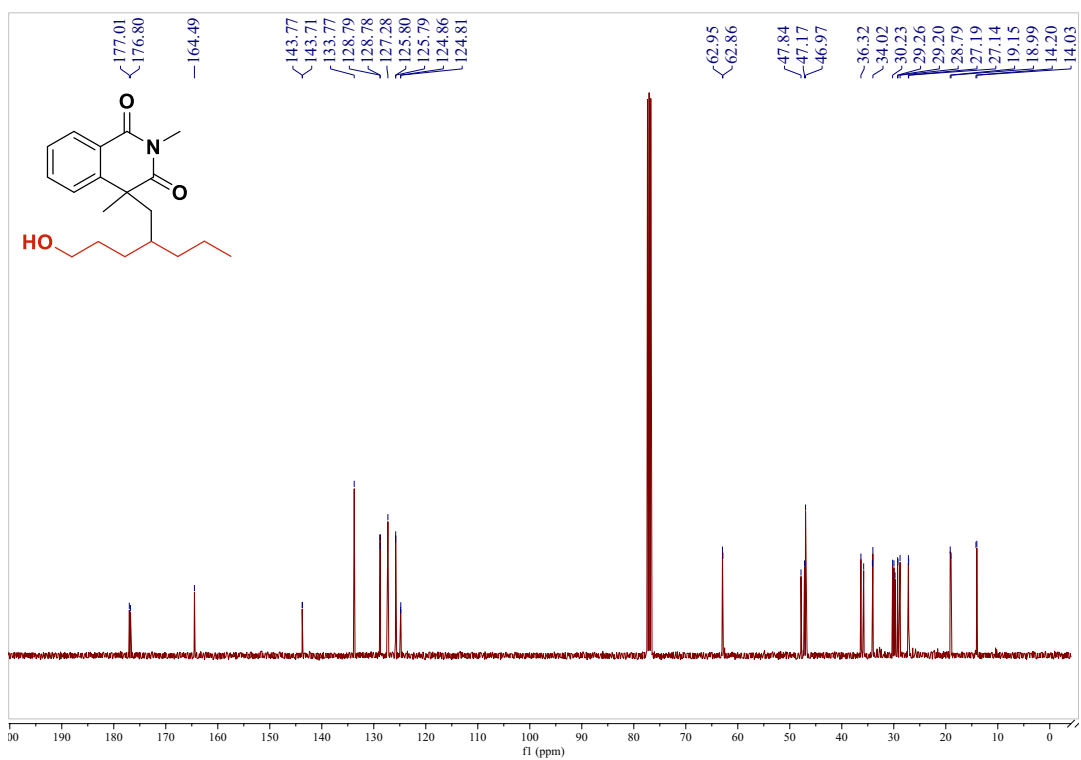

$^1\text{H}$  and  $^{13}\text{C}$  NMR spectra of **3ad**:

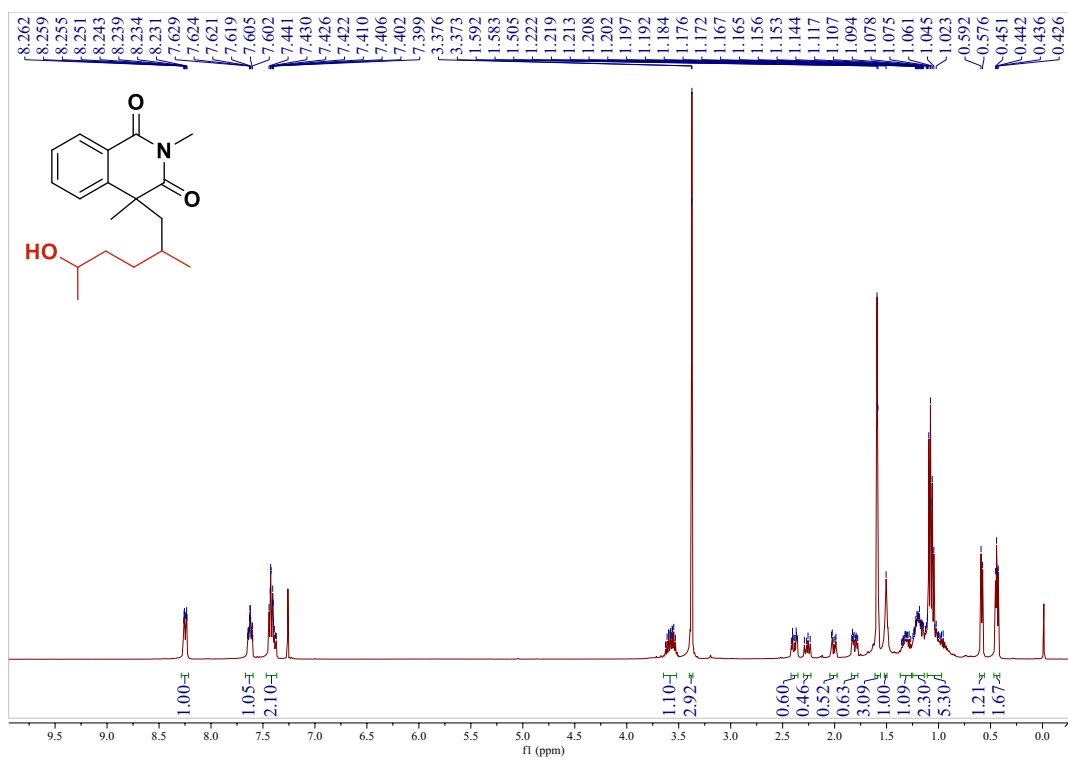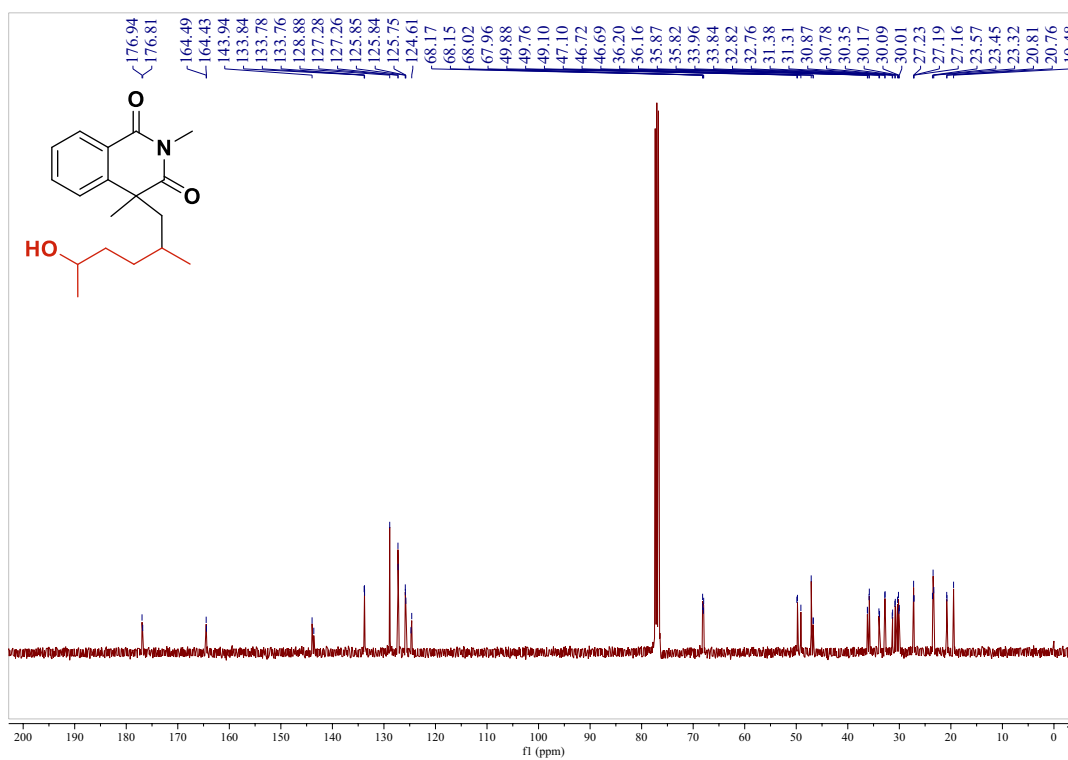



$^1\text{H}$  and  $^{13}\text{C}$  NMR spectra of **3ae**:

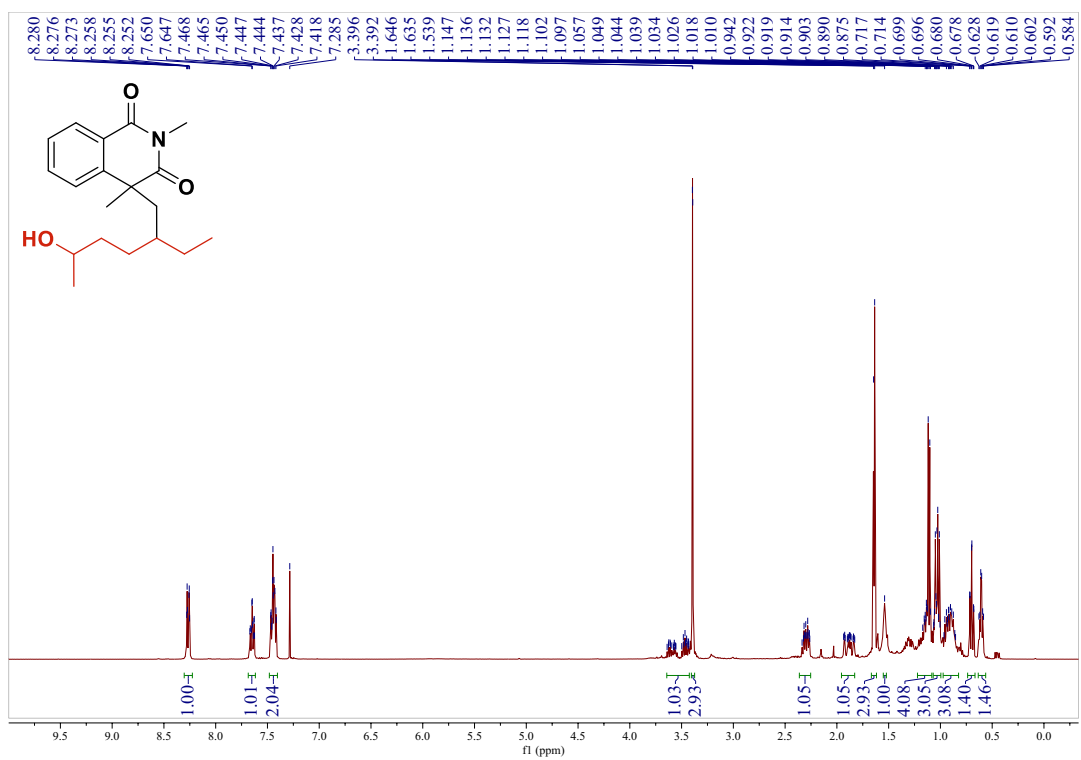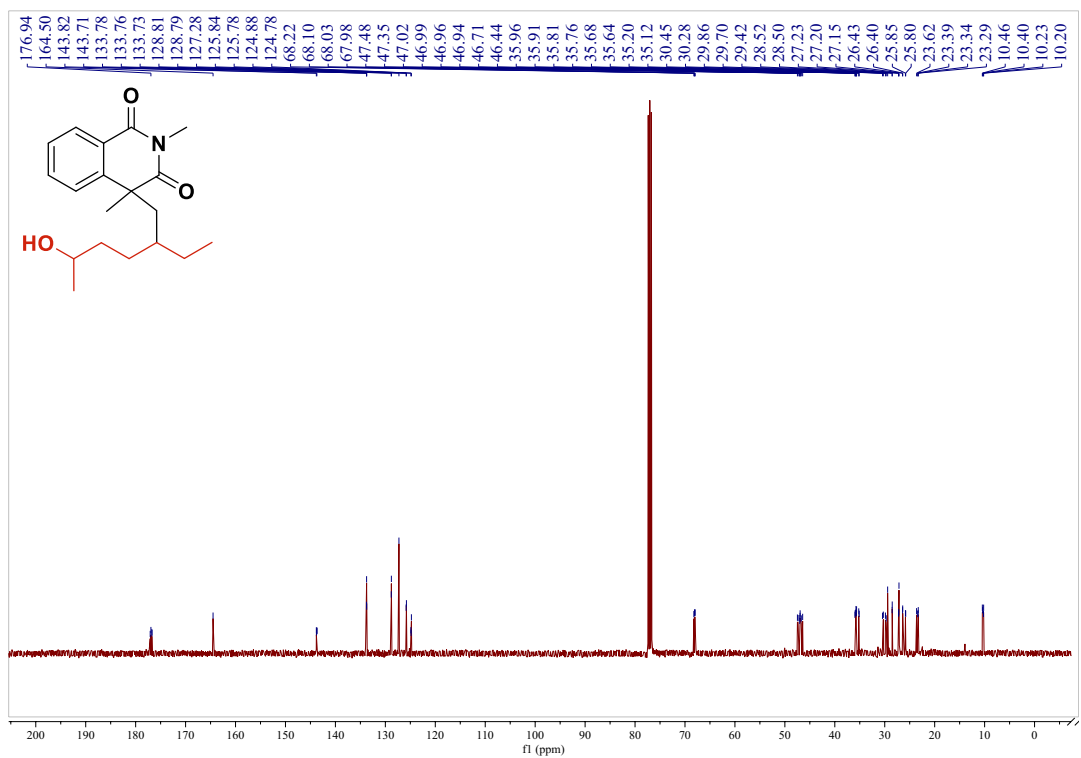

$^1\text{H}$  and  $^{13}\text{C}$  NMR spectra of **3af**:

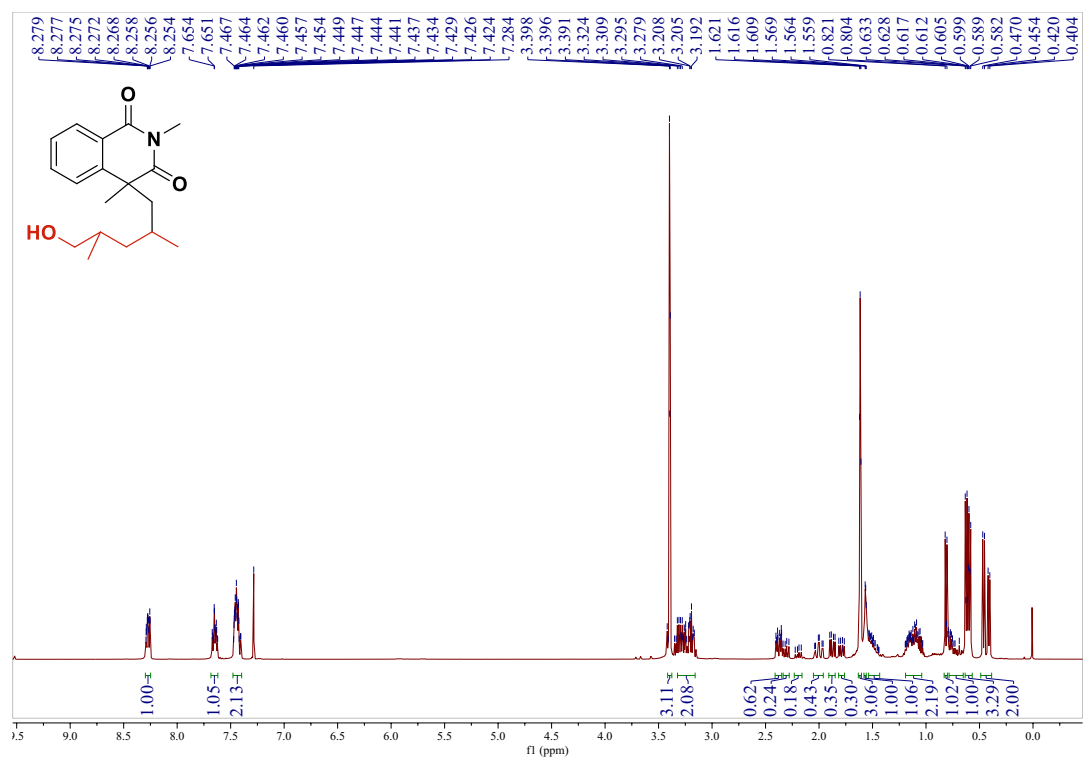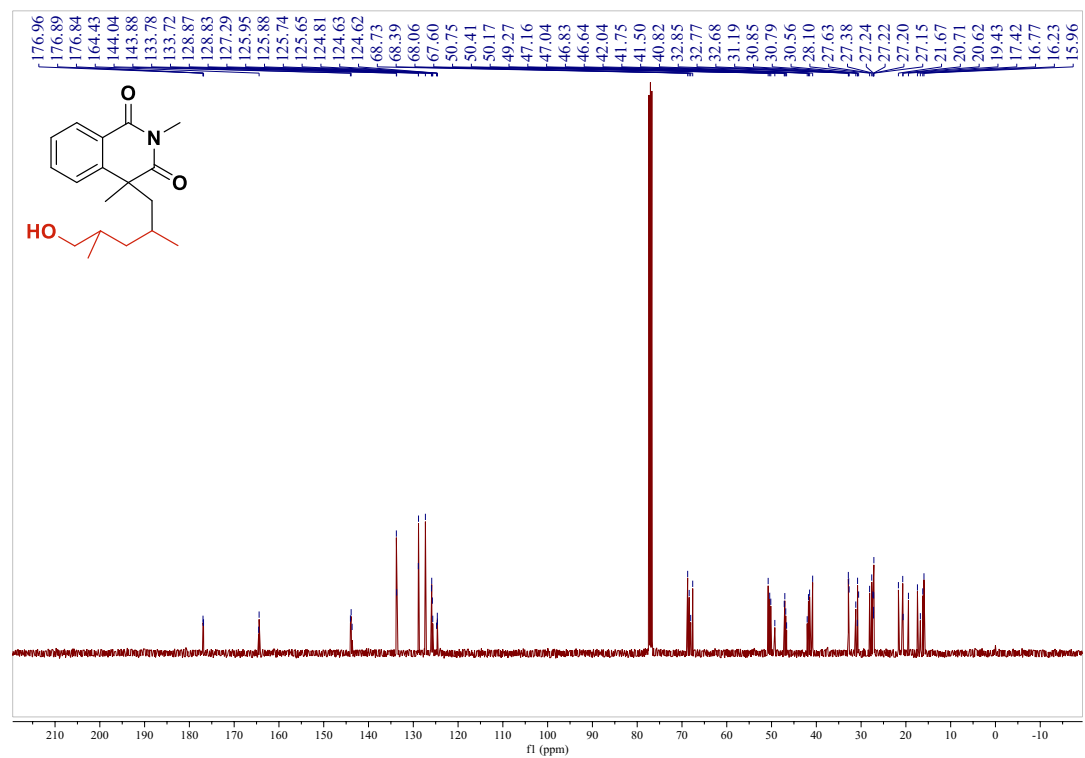

<sup>1</sup>H and <sup>13</sup>C NMR spectra of **3ag**:

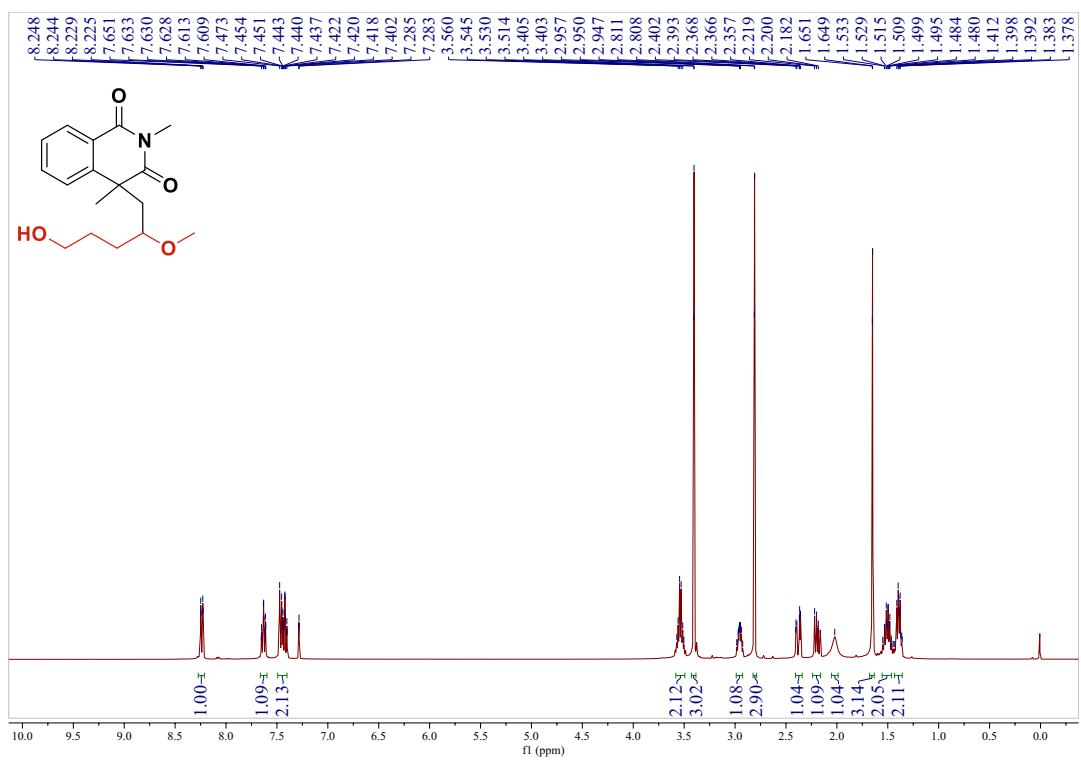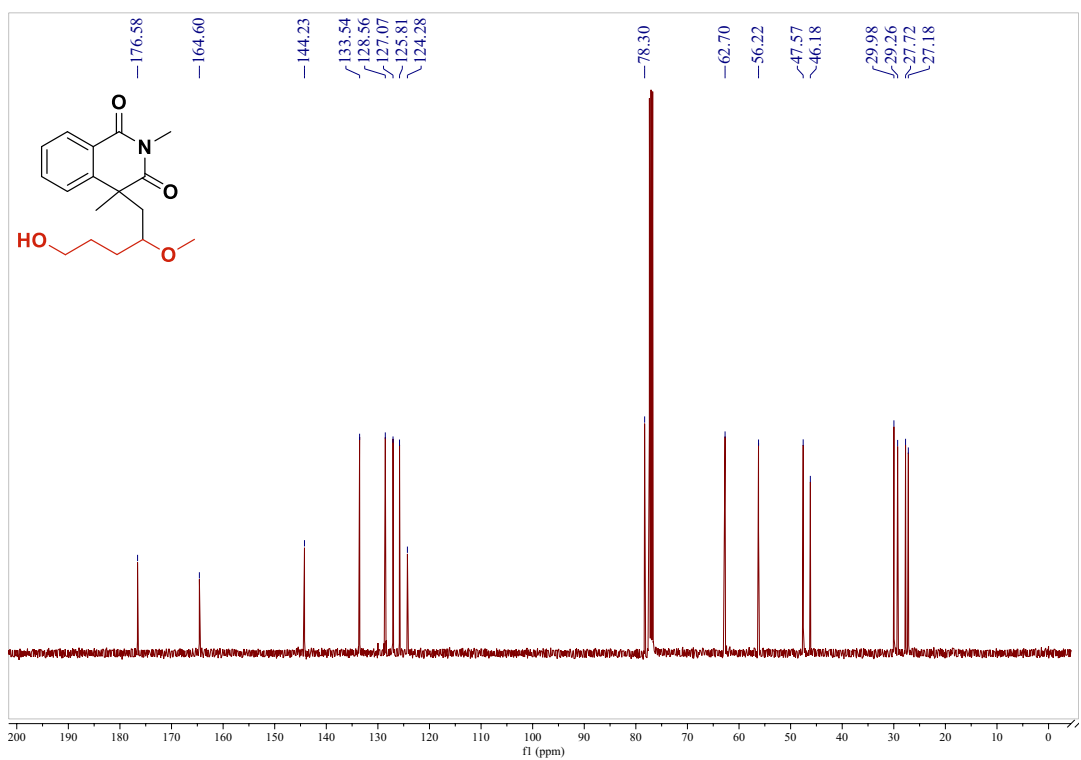

$^1\text{H}$  and  $^{13}\text{C}$  NMR spectra of **3ah**:

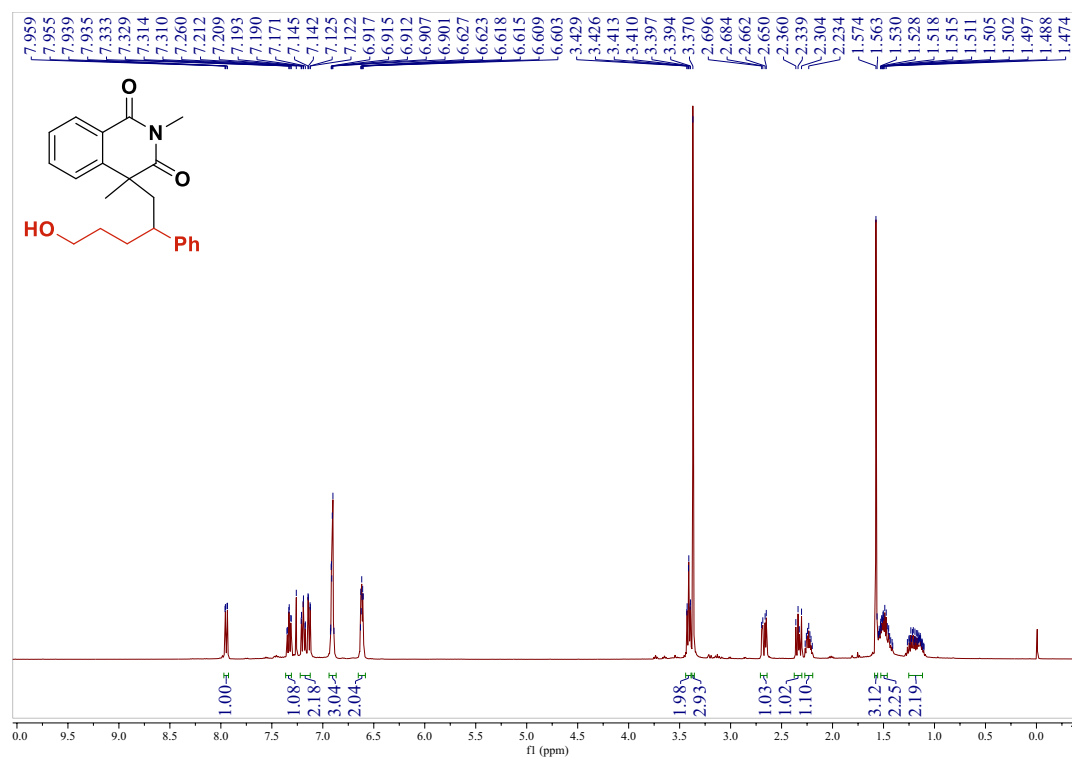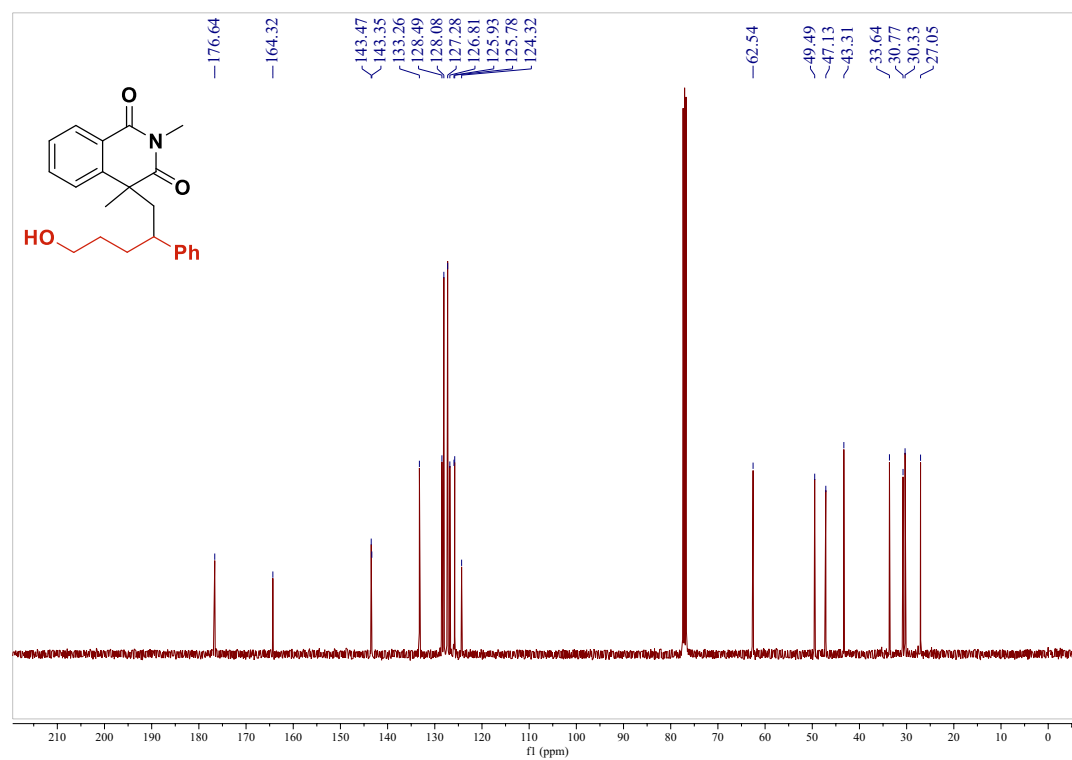

$^1\text{H}$  and  $^{13}\text{C}$  NMR spectra of **3ai**:

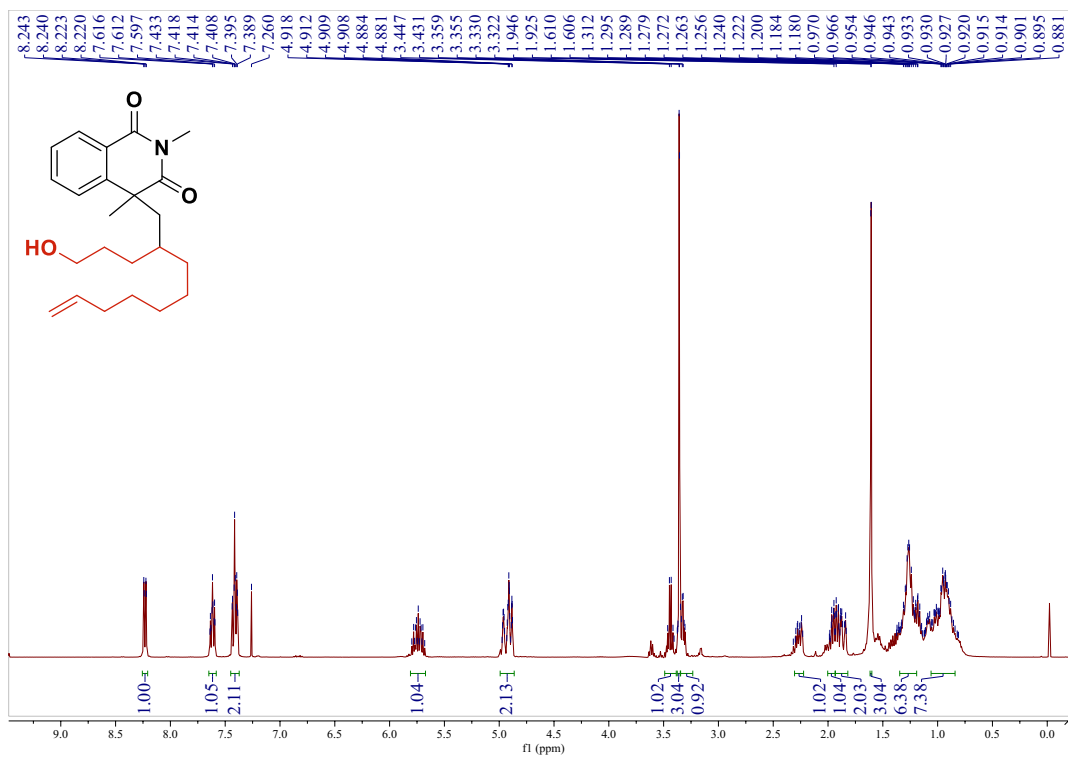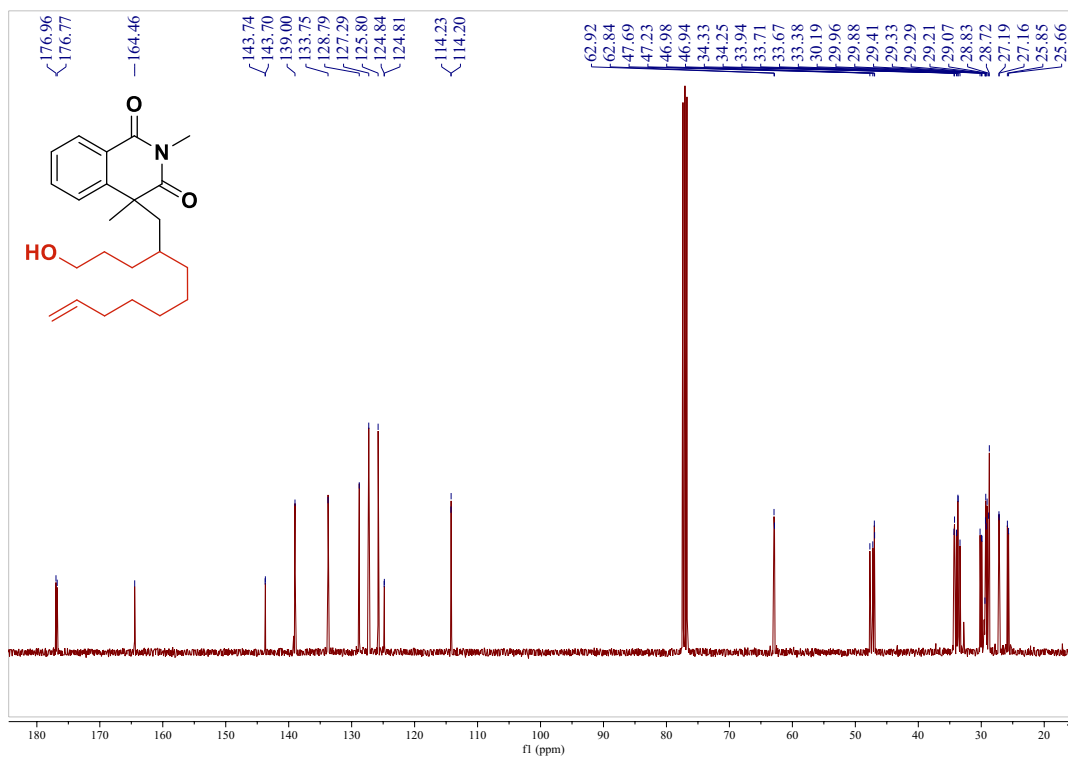

$^1\text{H}$  and  $^{13}\text{C}$  NMR spectra of **3aj**:

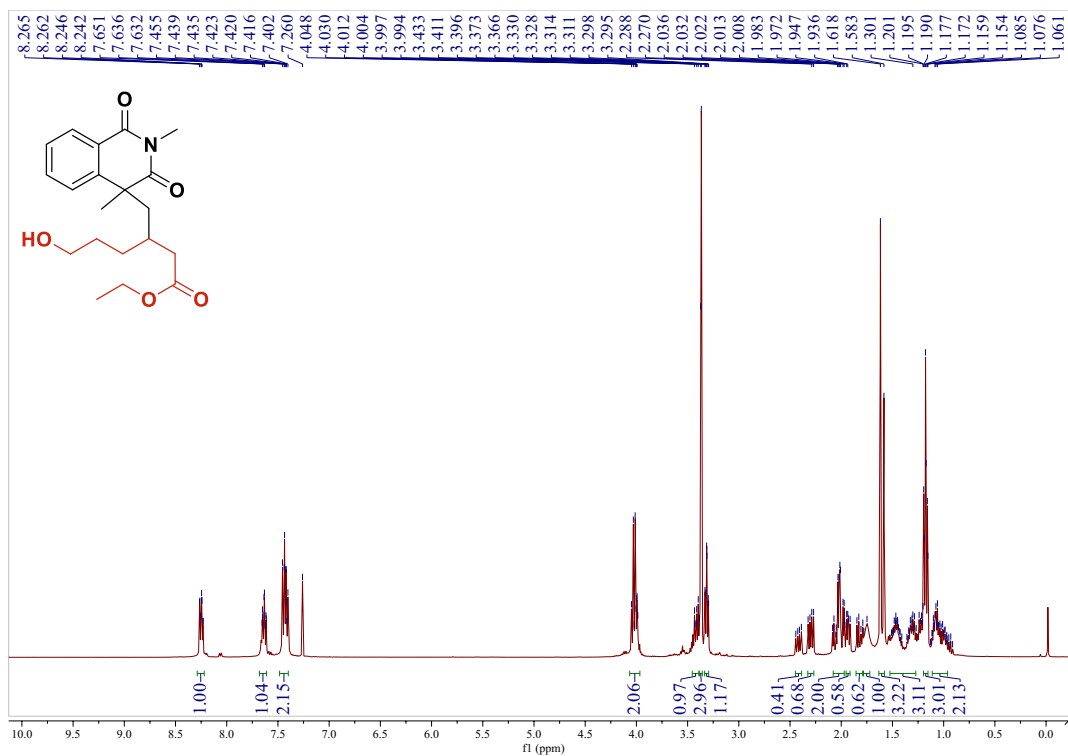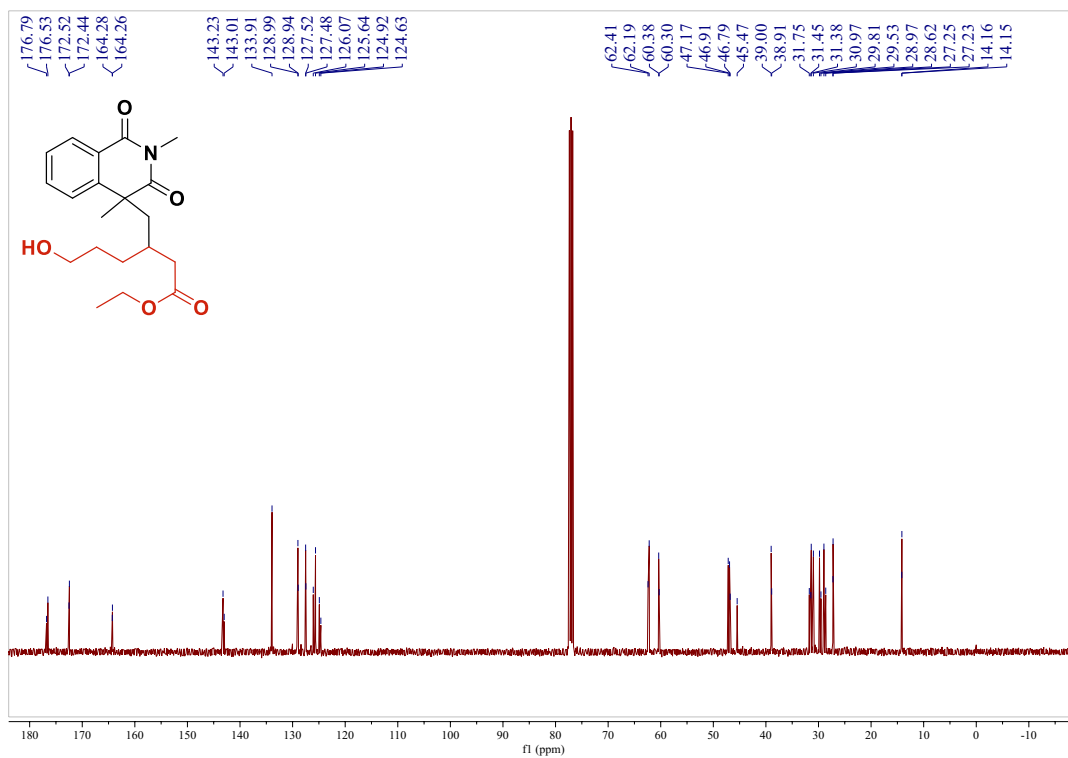

$^1\text{H}$  and  $^{13}\text{C}$  NMR spectra of **3ak**:

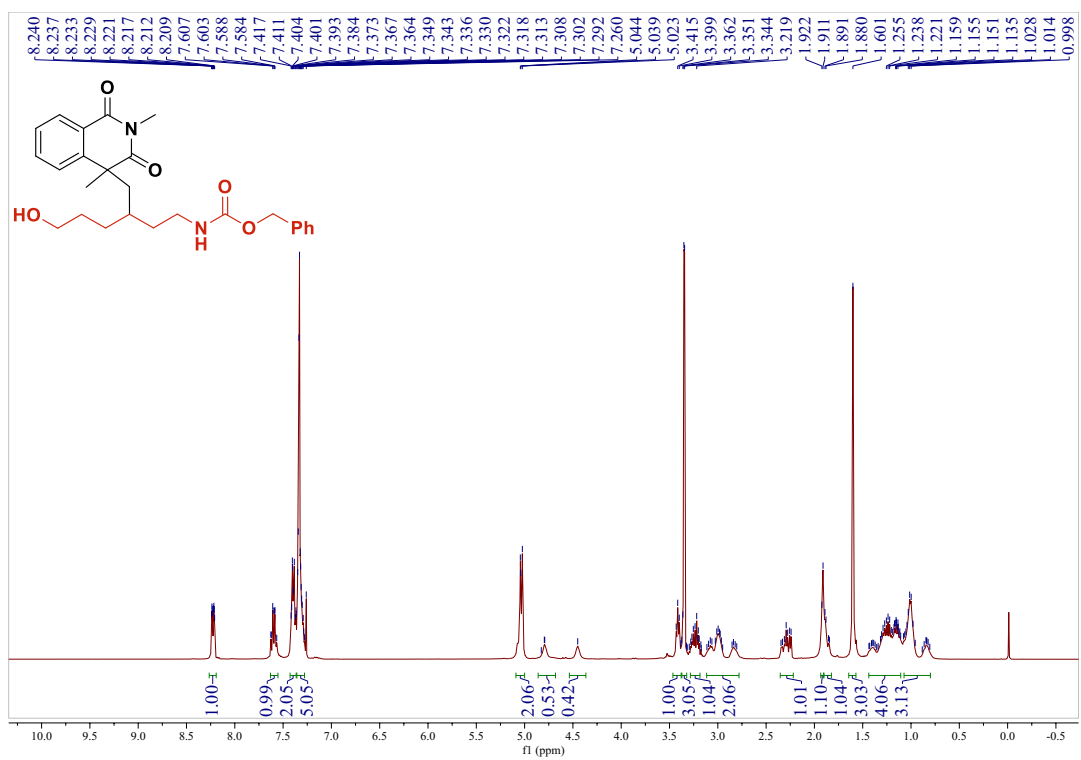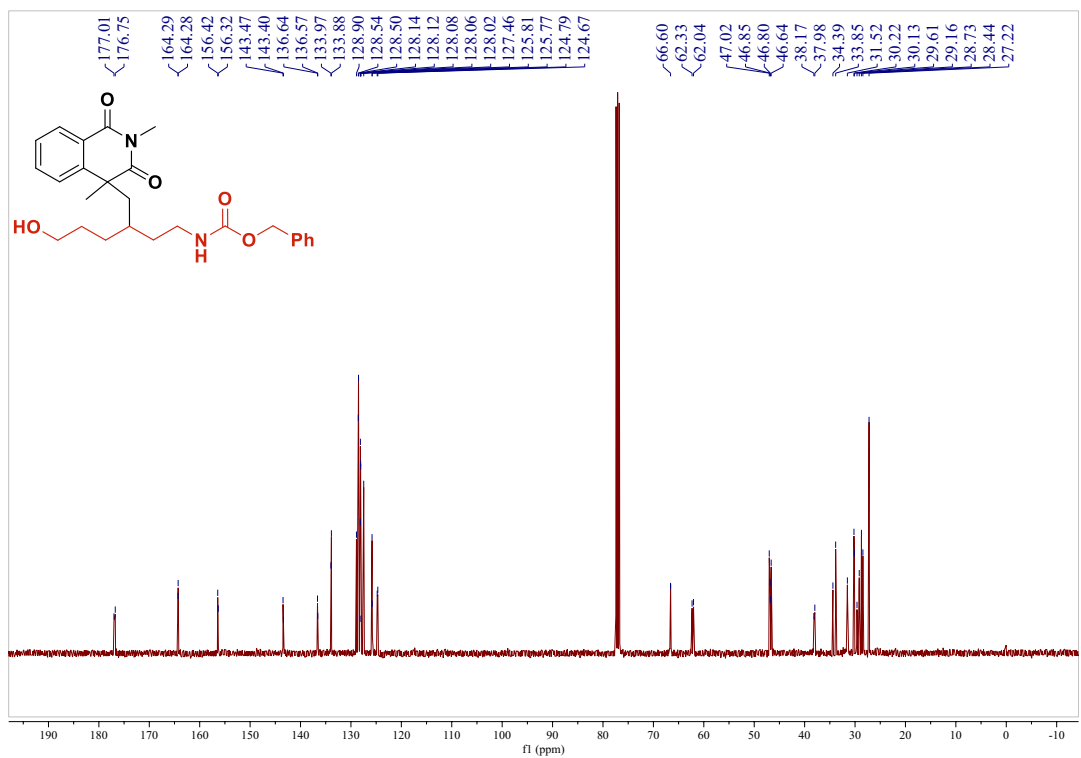

$^1\text{H}$  and  $^{13}\text{C}$  NMR spectra of **3al**:

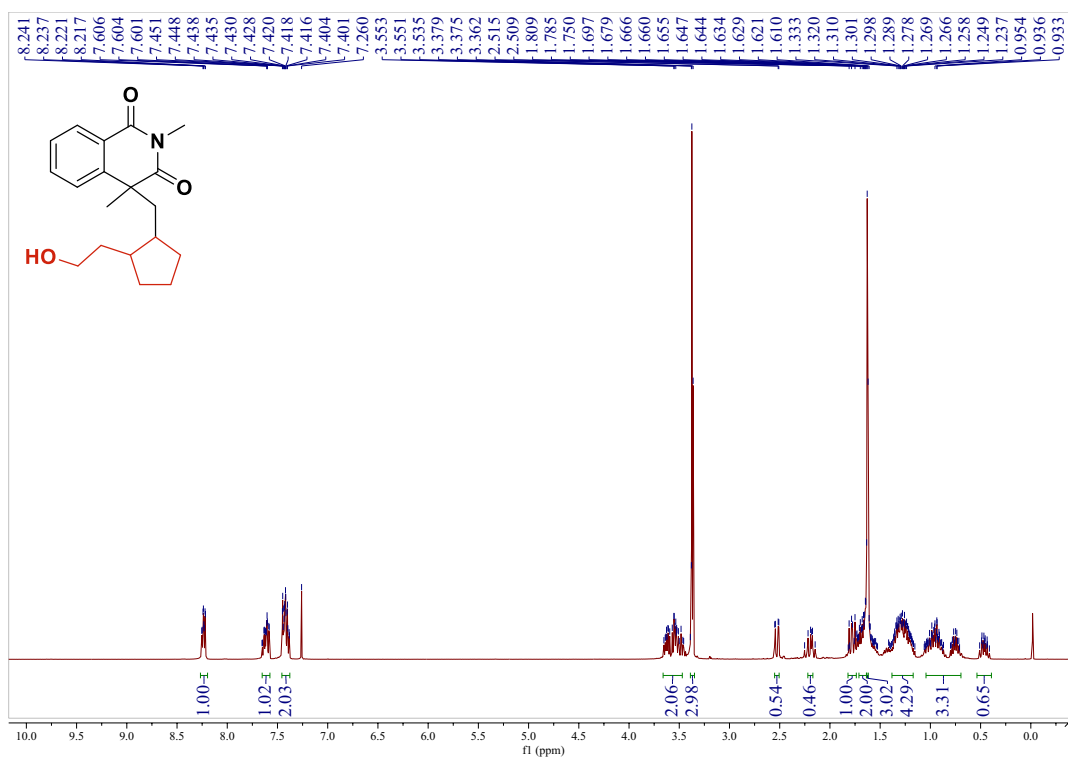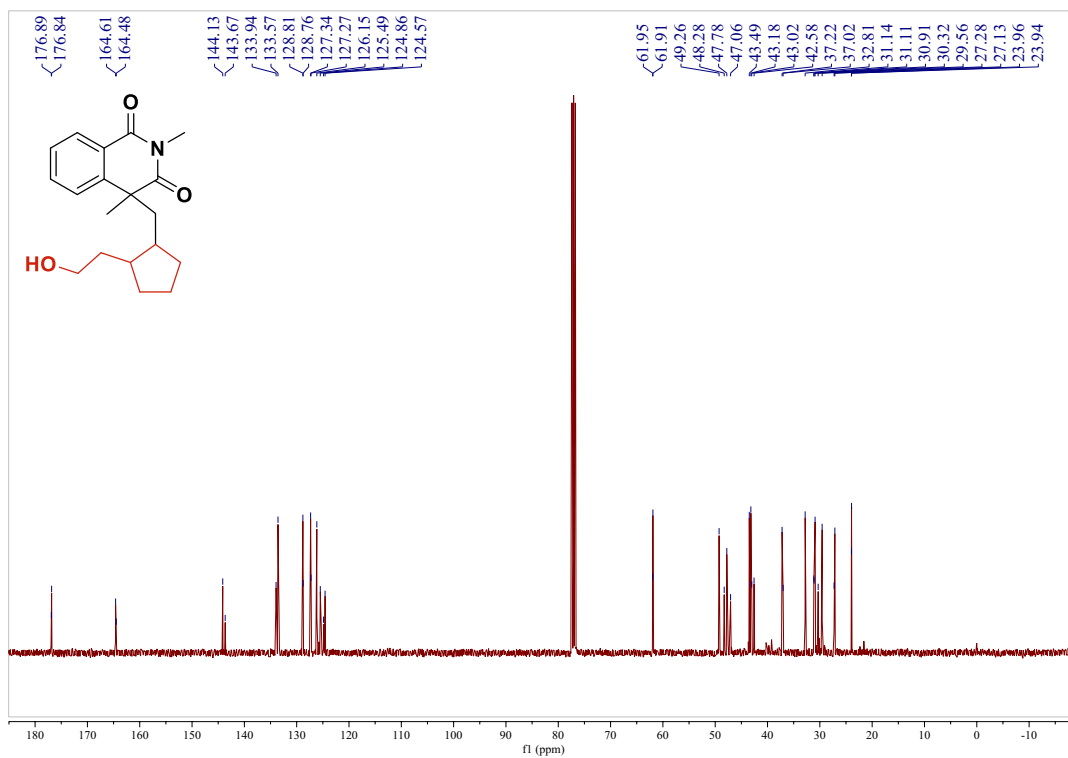



$^1\text{H}$  and  $^{13}\text{C}$  NMR spectra of **3am**:

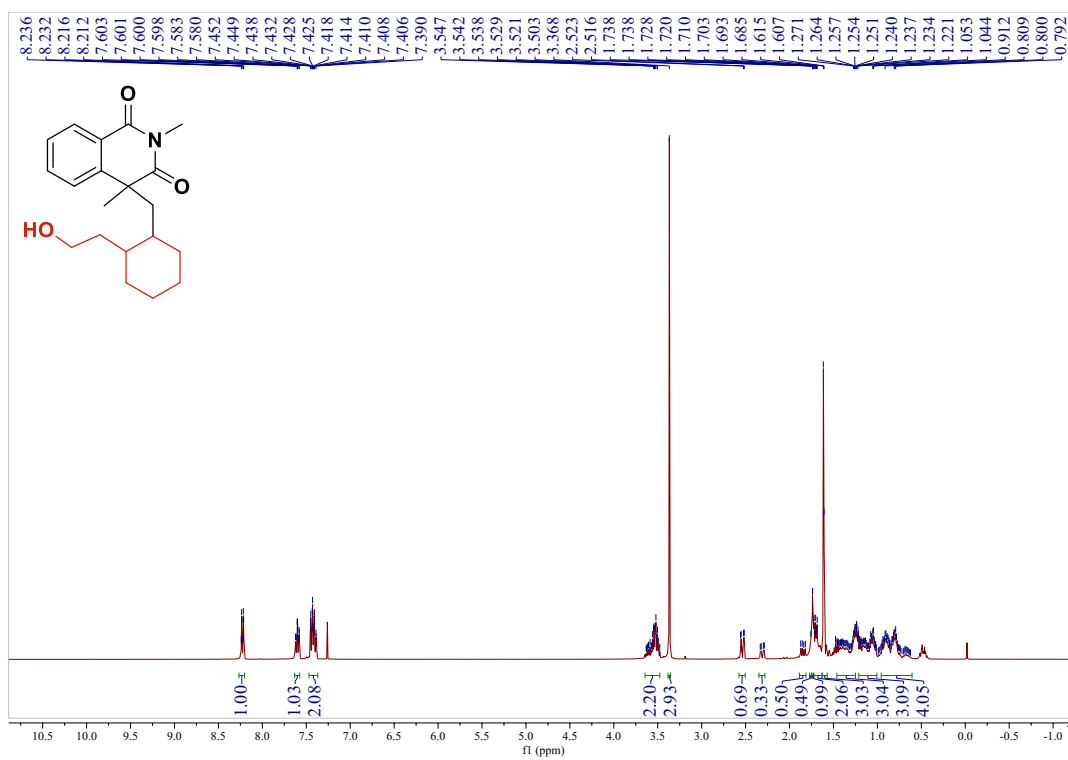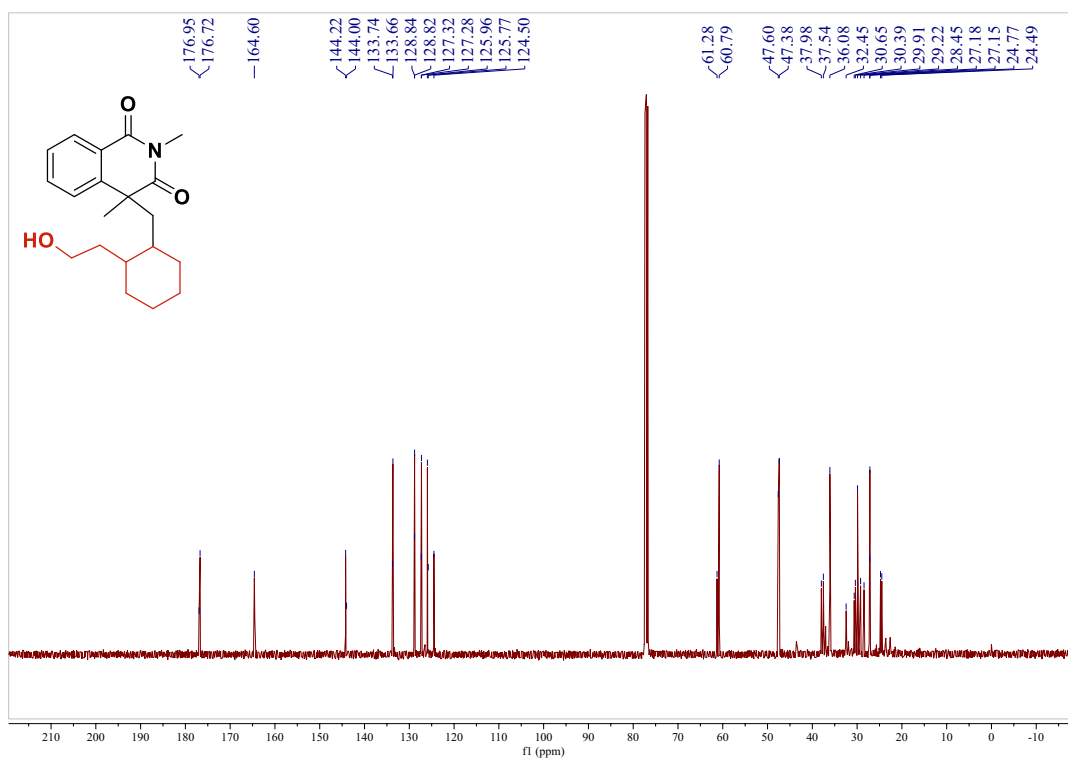

$^1\text{H}$  and  $^{13}\text{C}$  NMR spectra of **3an**:

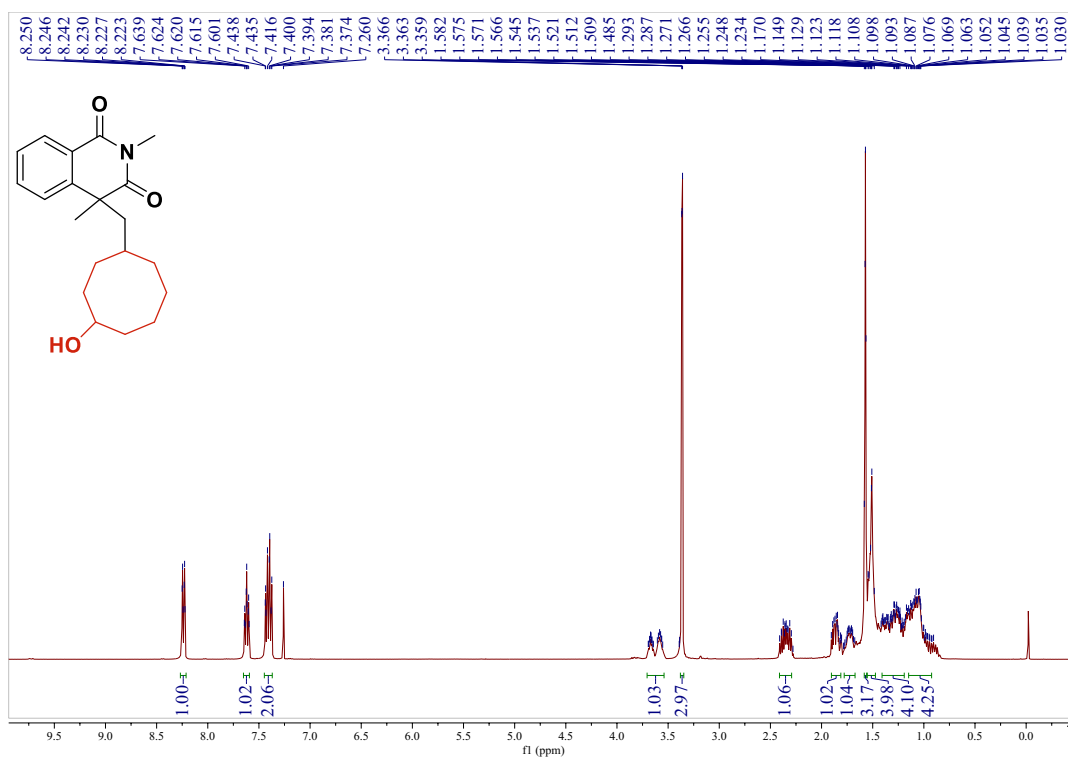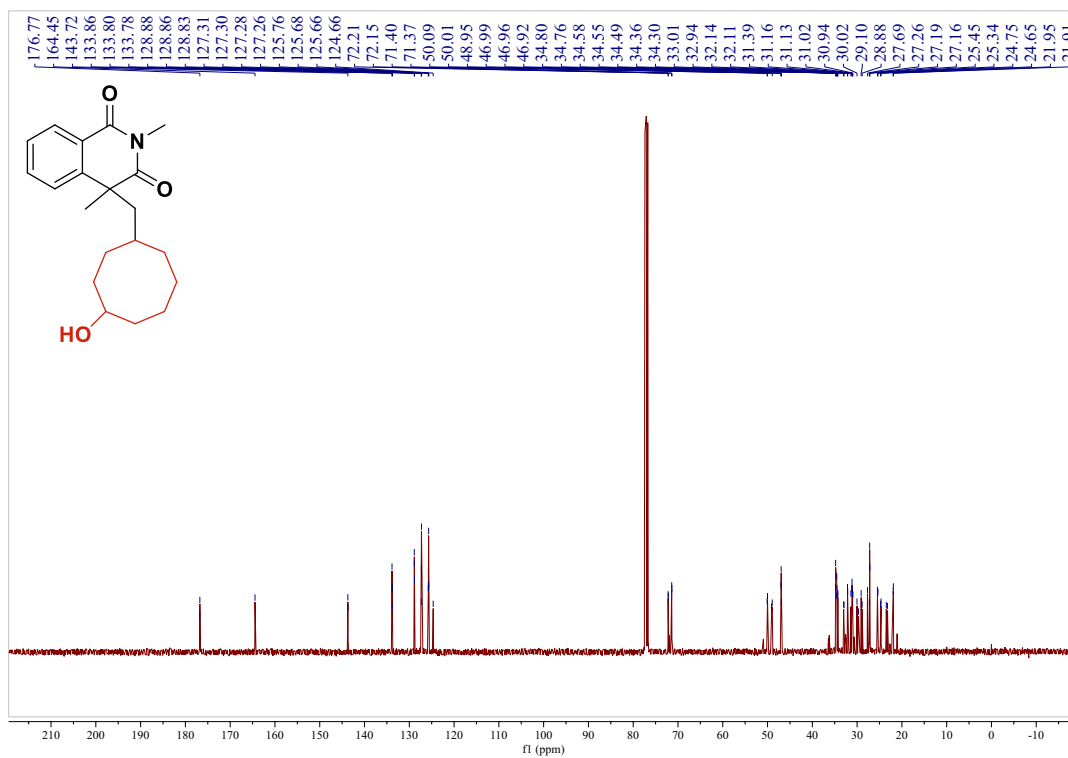

<sup>1</sup>H and <sup>13</sup>C NMR spectra of **3ao**:

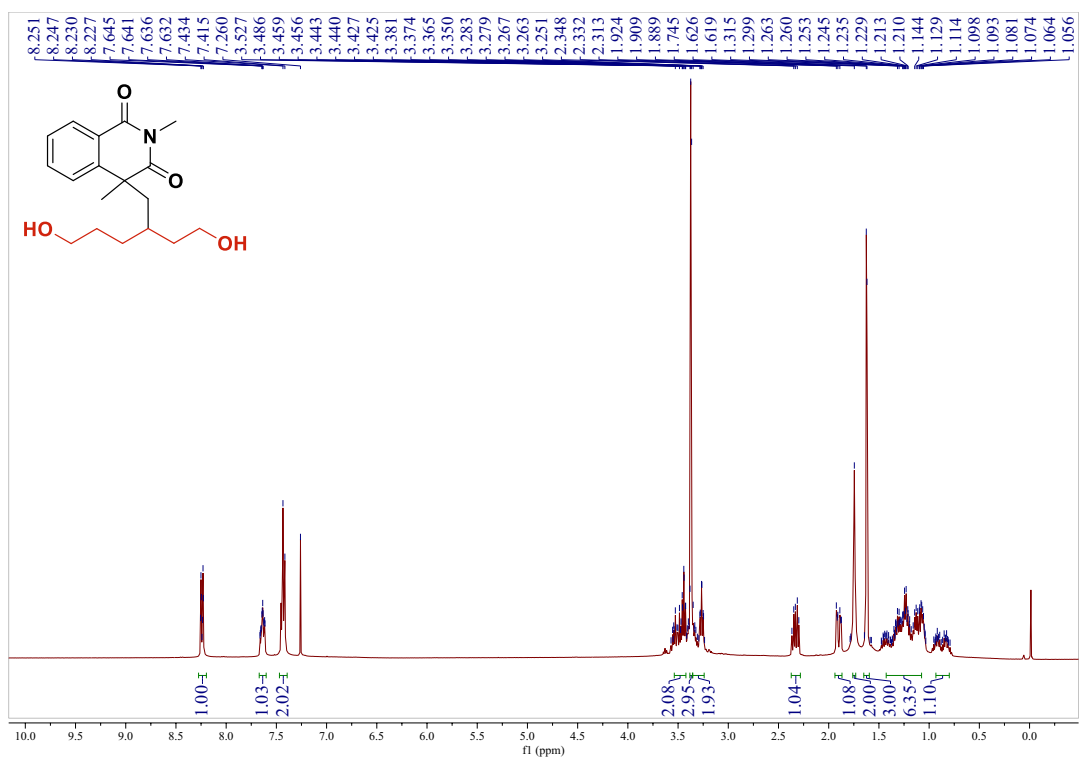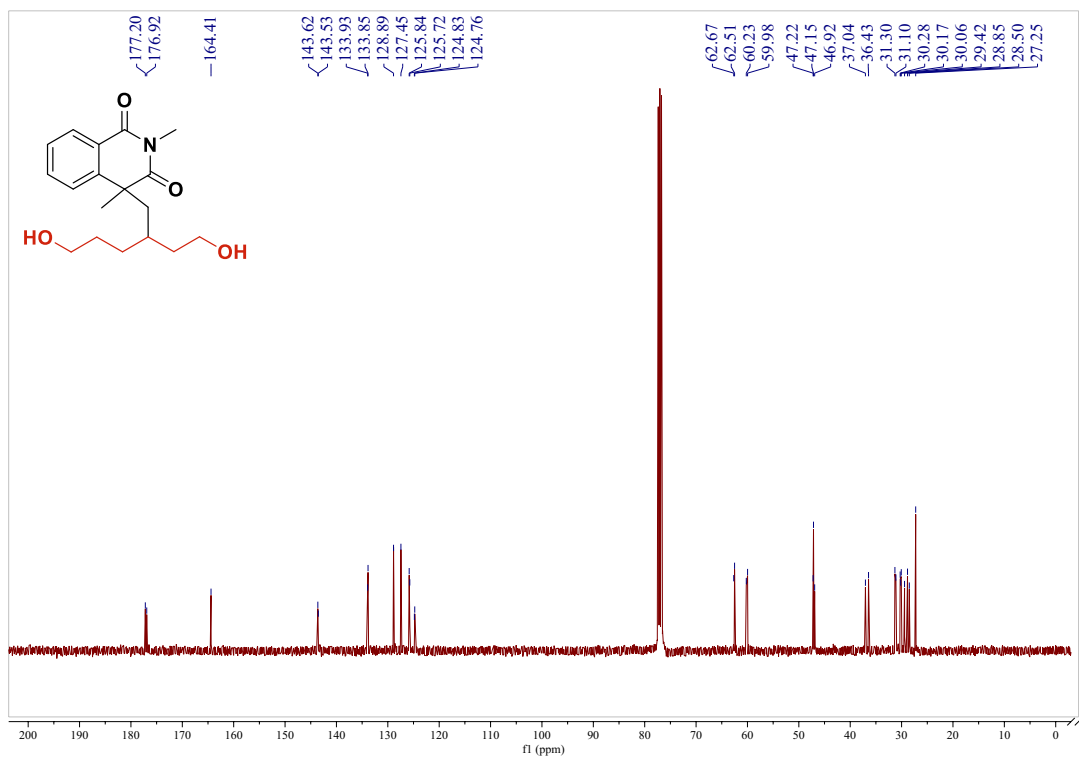

$^1\text{H}$  and  $^{13}\text{C}$  NMR spectra of **3ap**:

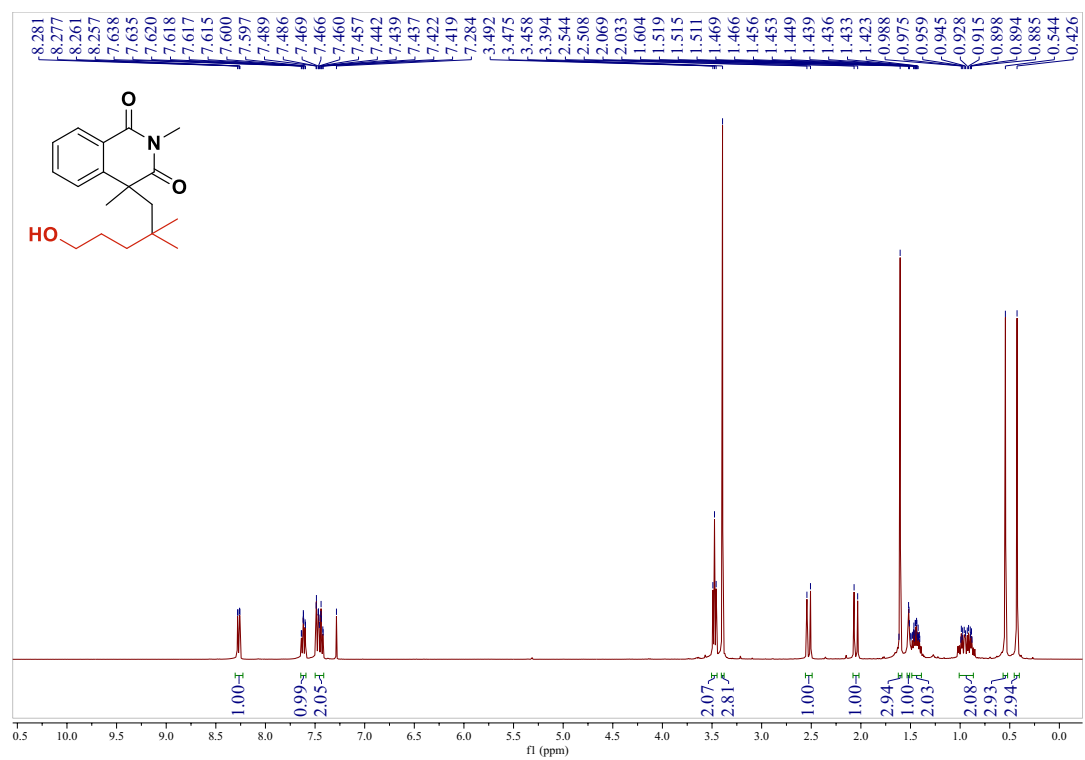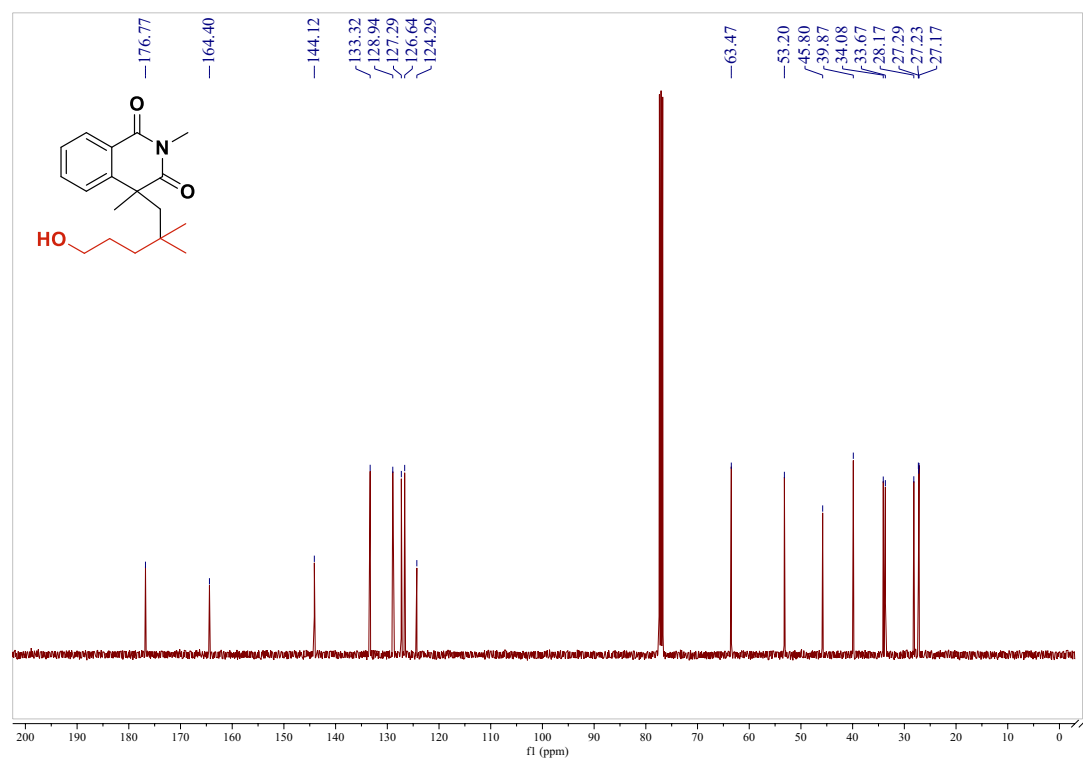

$^1\text{H}$  and  $^{13}\text{C}$  NMR spectra of **3aq**:

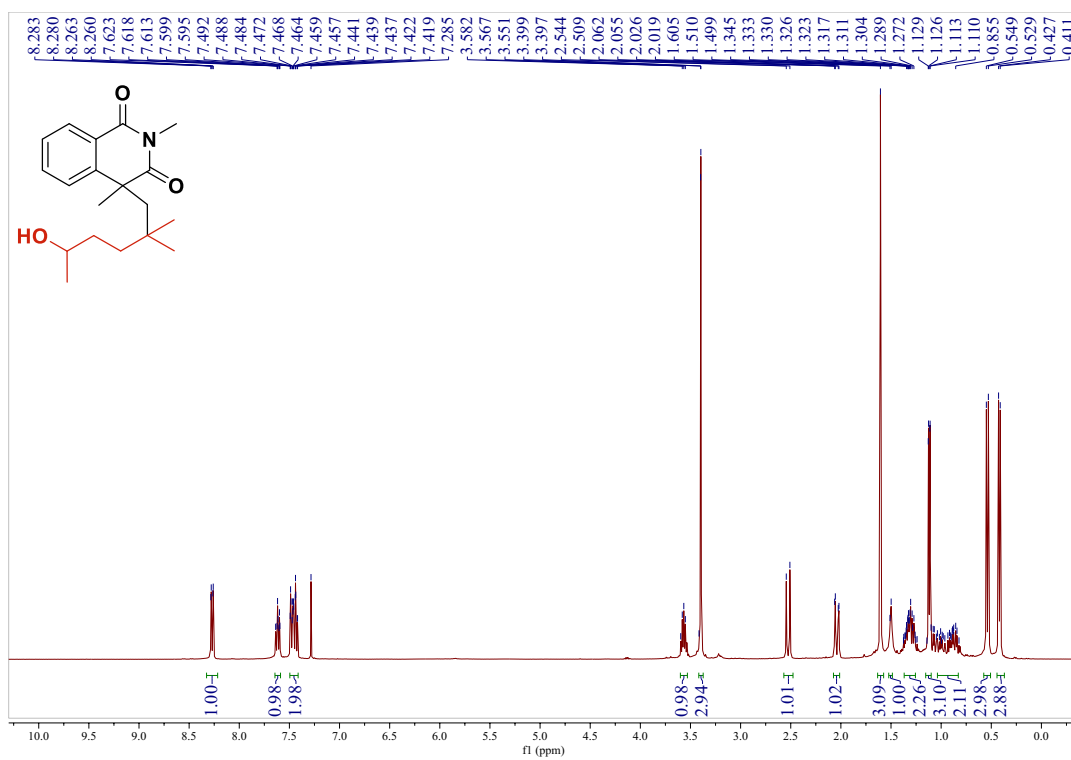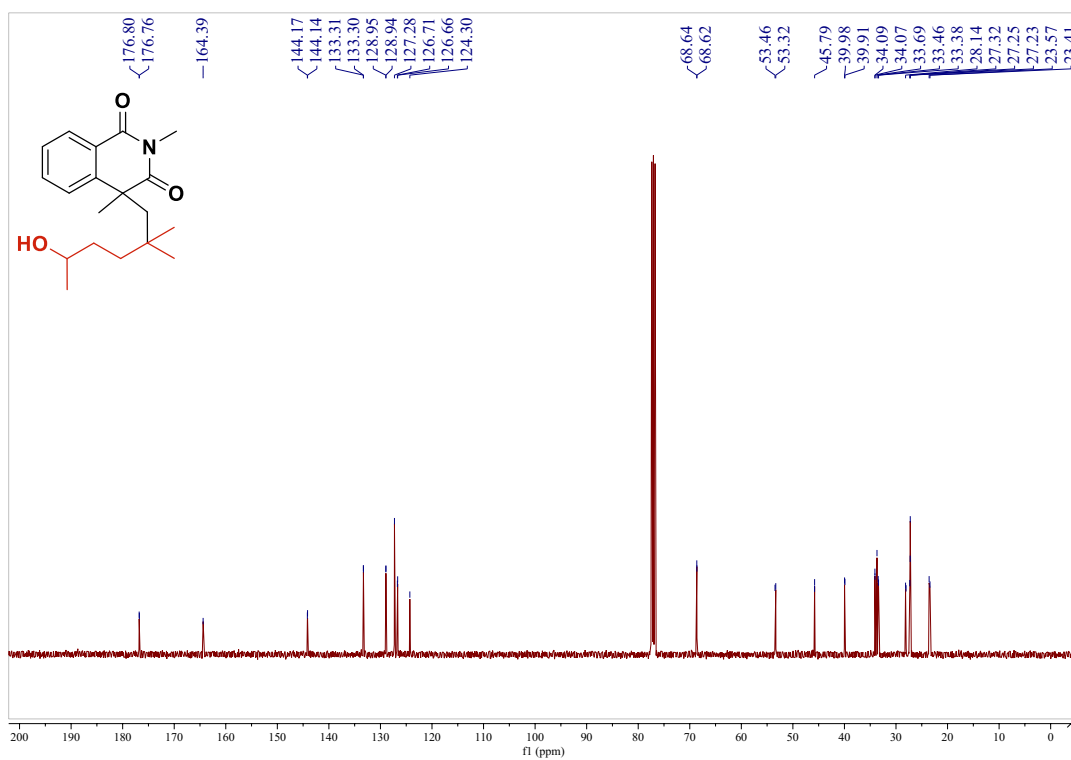

$^1\text{H}$  and  $^{13}\text{C}$  NMR spectra of **3ar**:

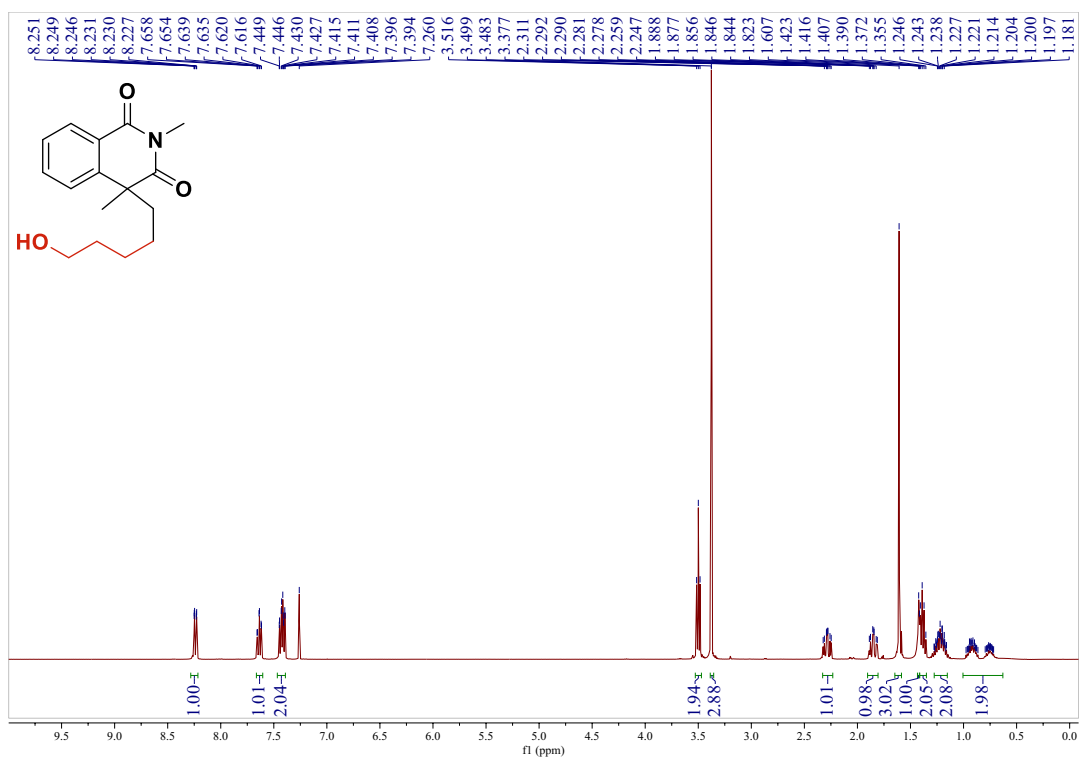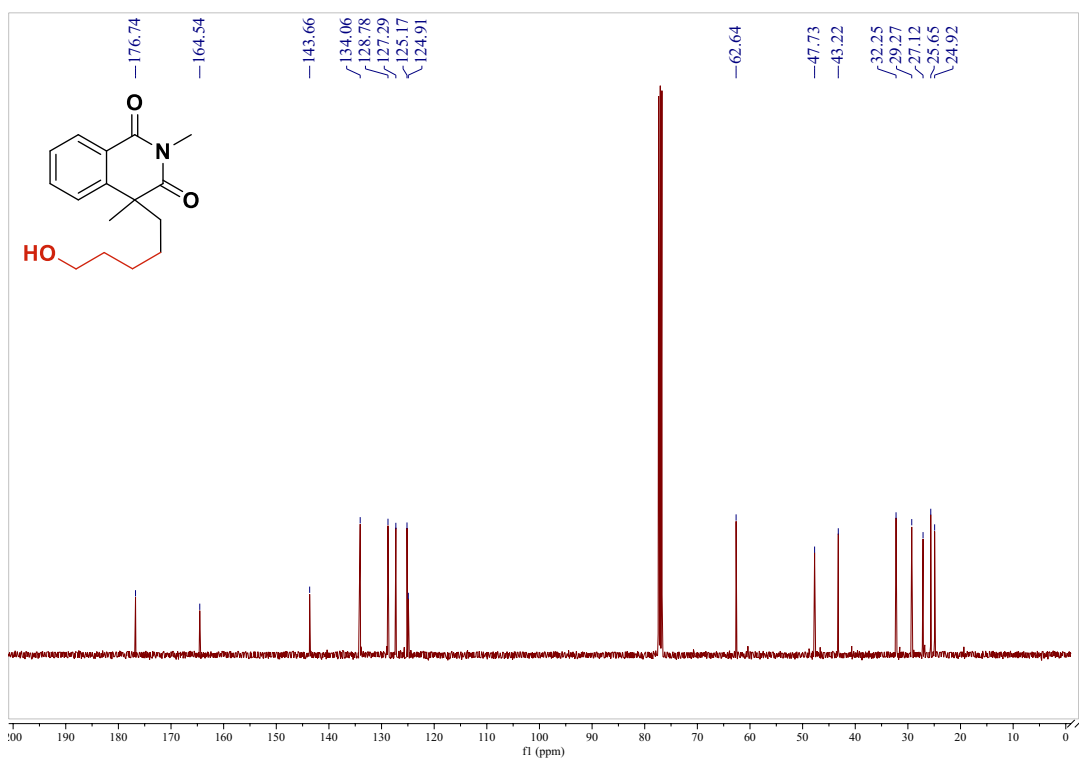

$^1\text{H}$  and  $^{13}\text{C}$  NMR spectra of **3as**:

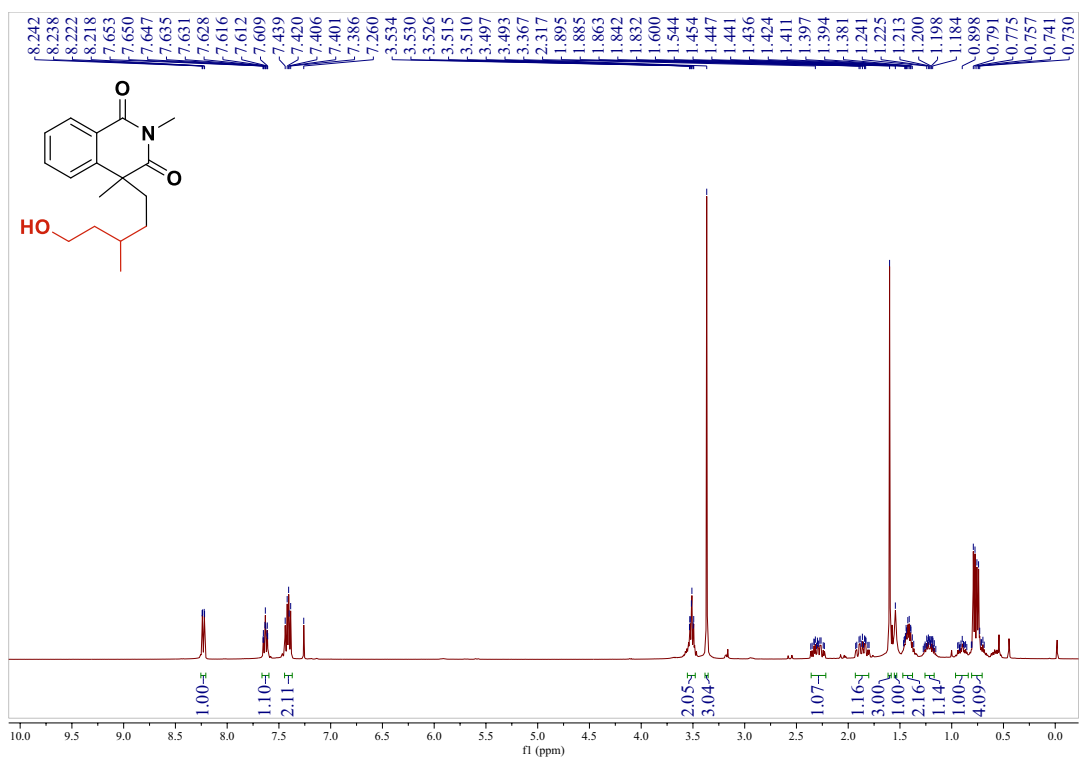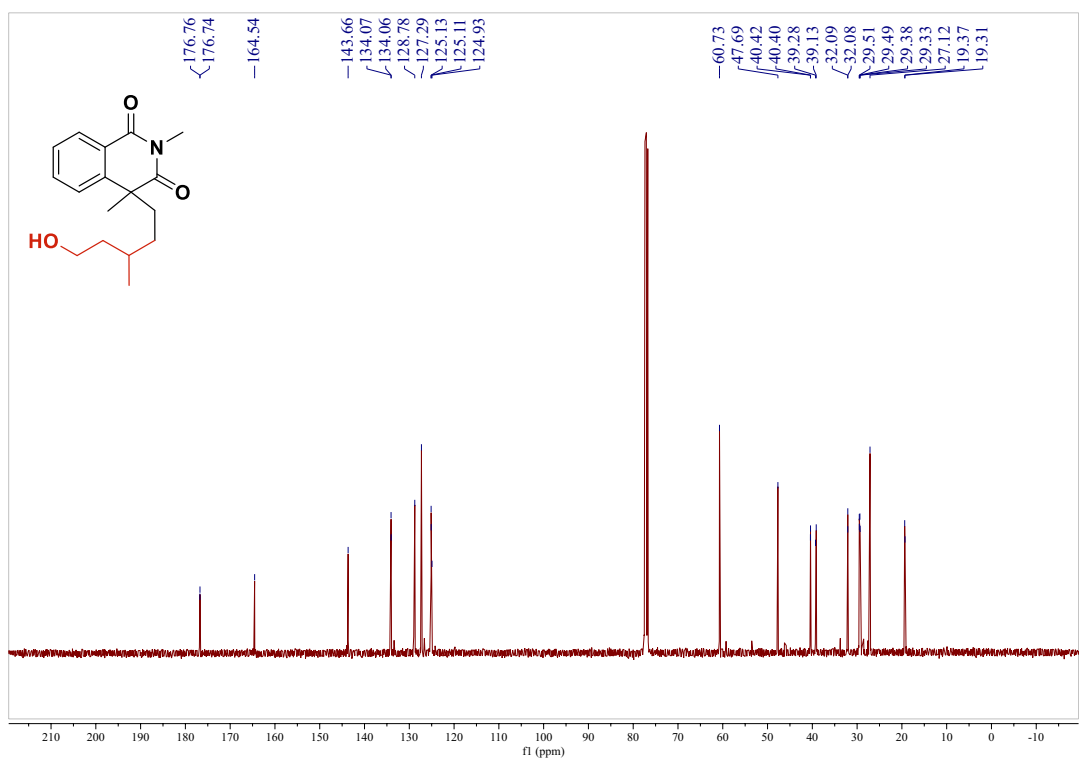

$^1\text{H}$  and  $^{13}\text{C}$  NMR spectra of **3at**:

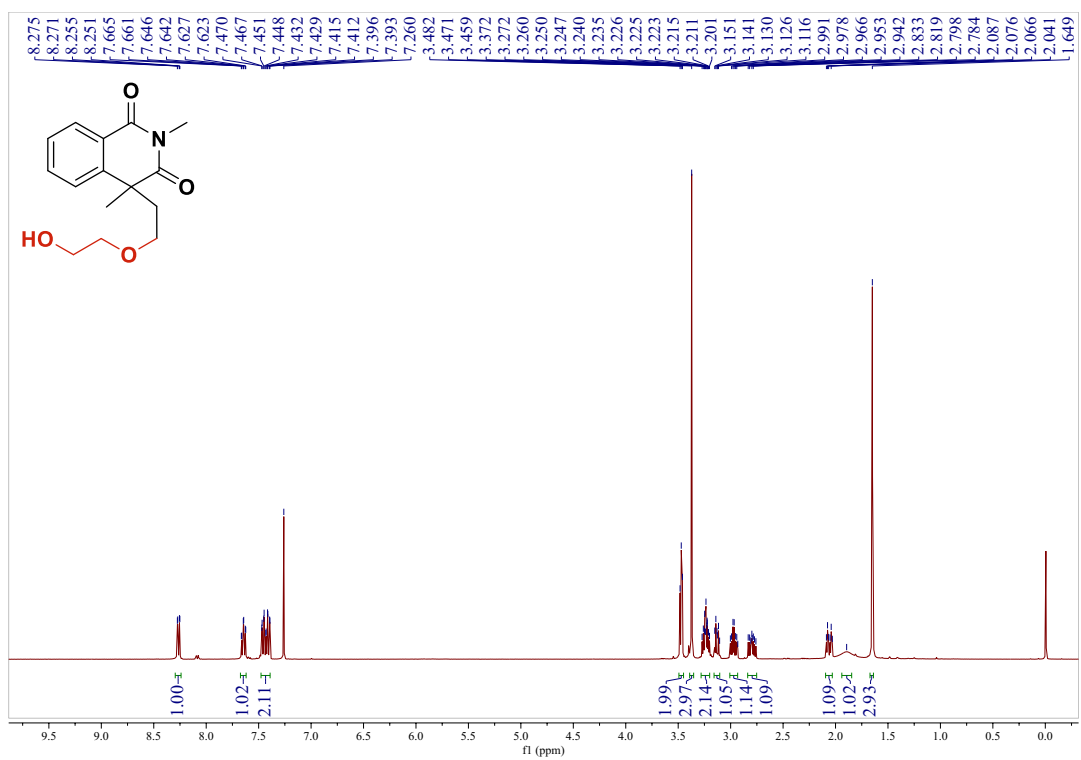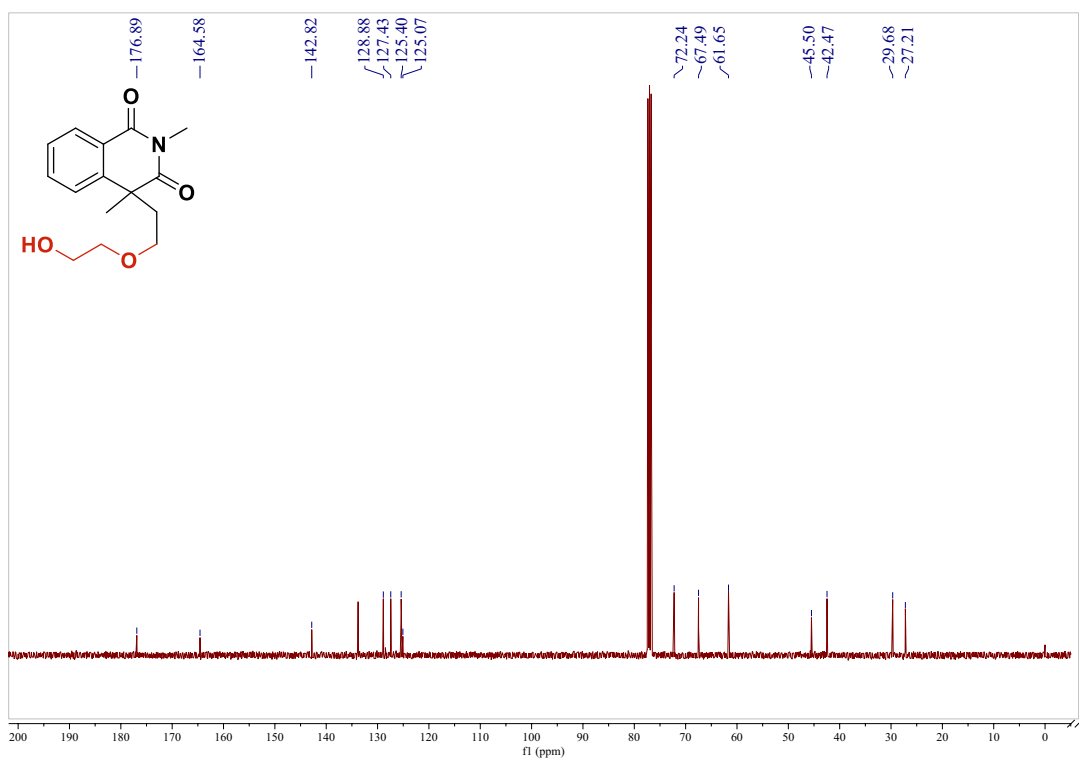



$^1\text{H}$  and  $^{13}\text{C}$  NMR spectra of **5aa**:

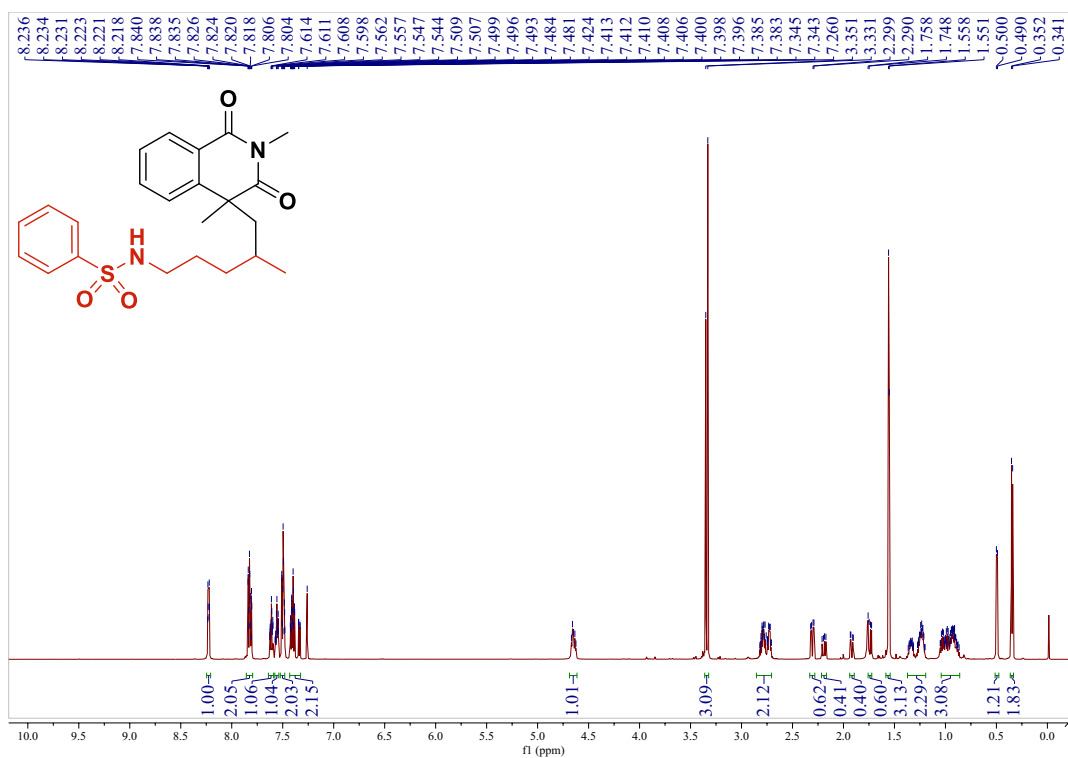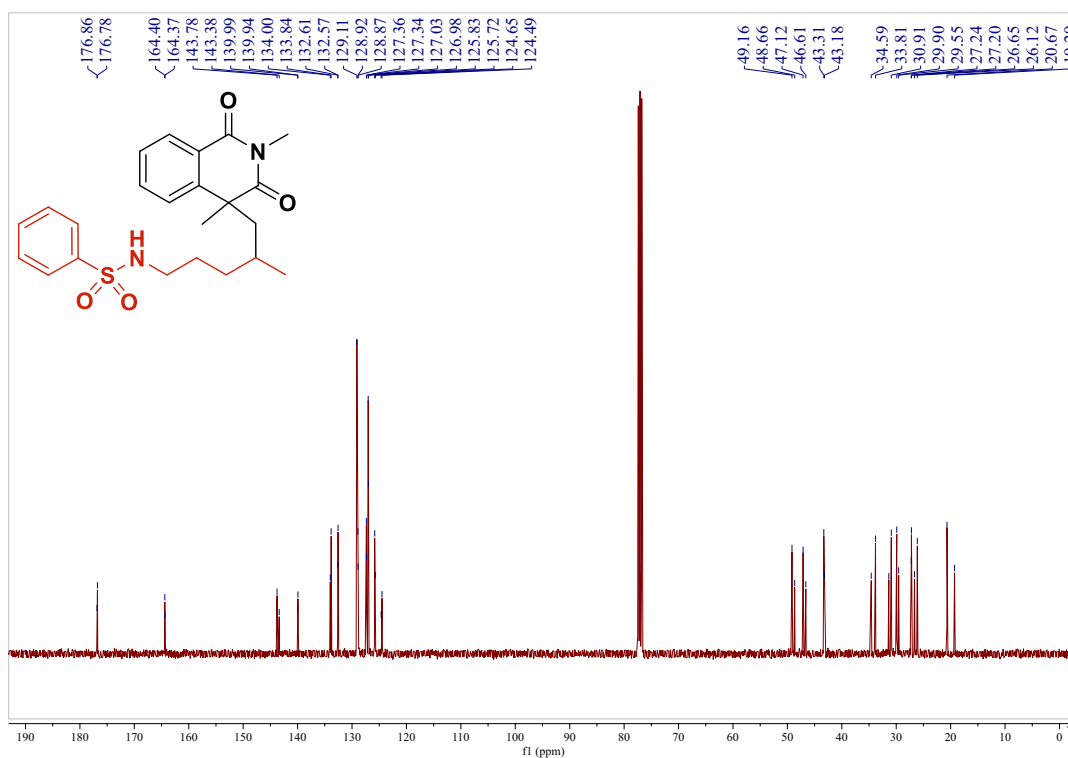

$^1\text{H}$  and  $^{13}\text{C}$  NMR spectra of **5ab**:

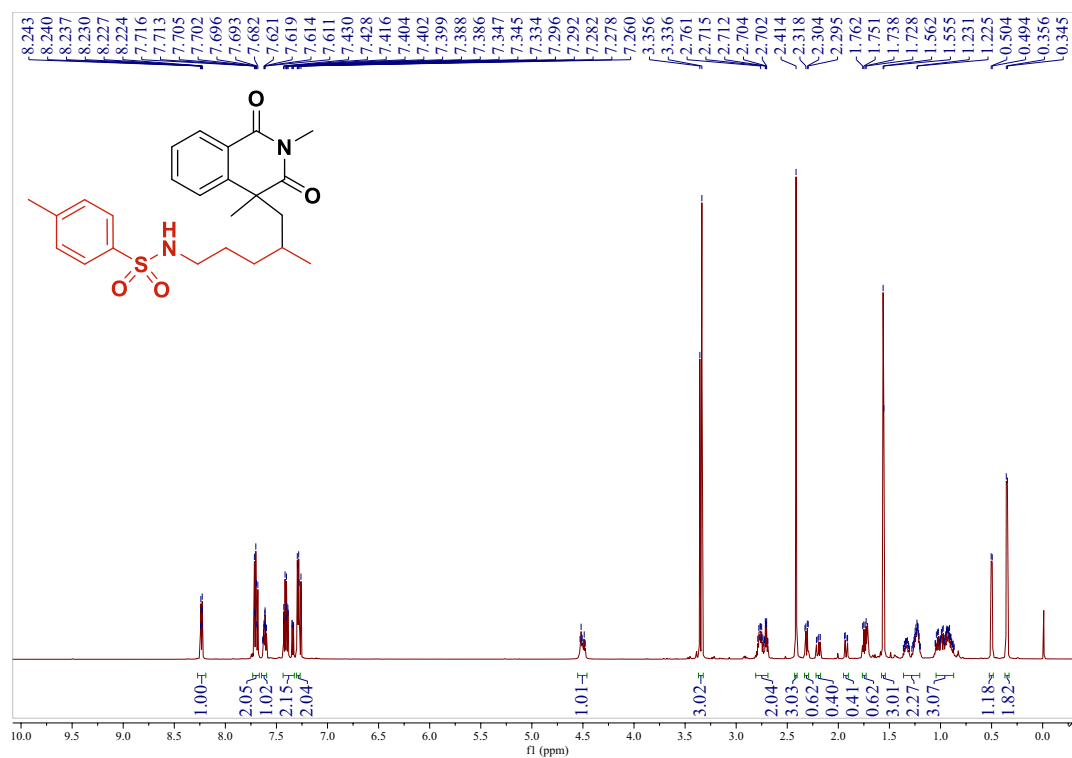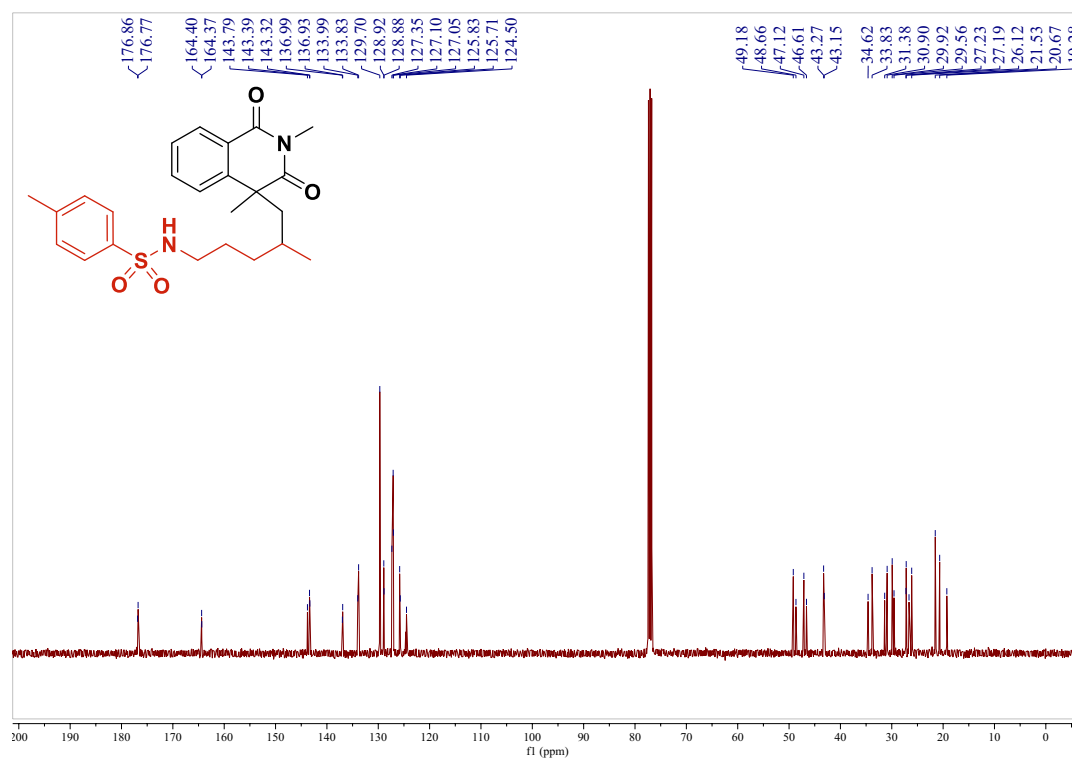

$^1\text{H}$  and  $^{13}\text{C}$  NMR spectra of **5ac**:

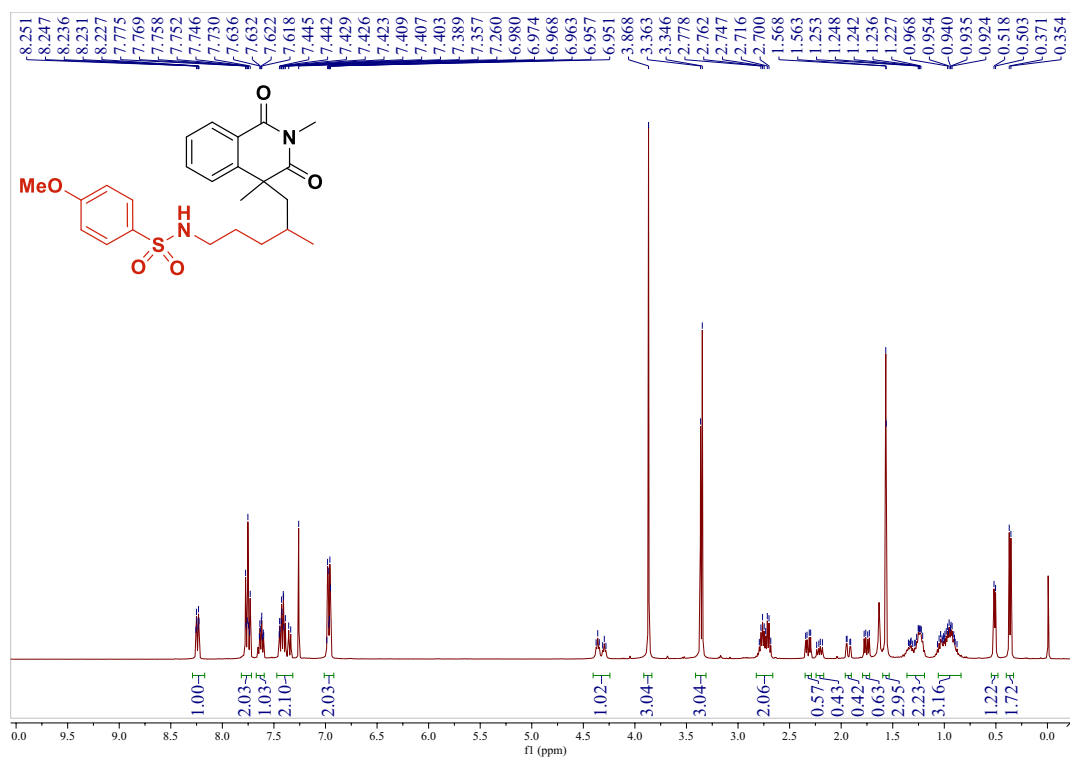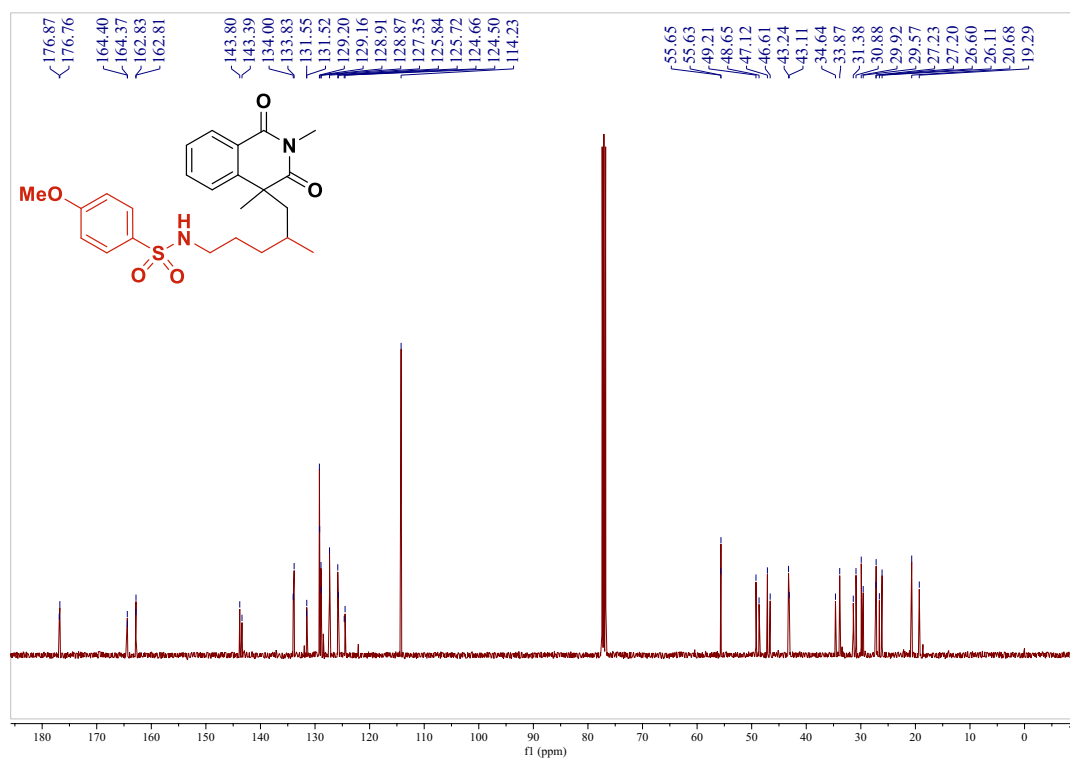

$^1\text{H}$  and  $^{13}\text{C}$  NMR spectra of **5ad**:

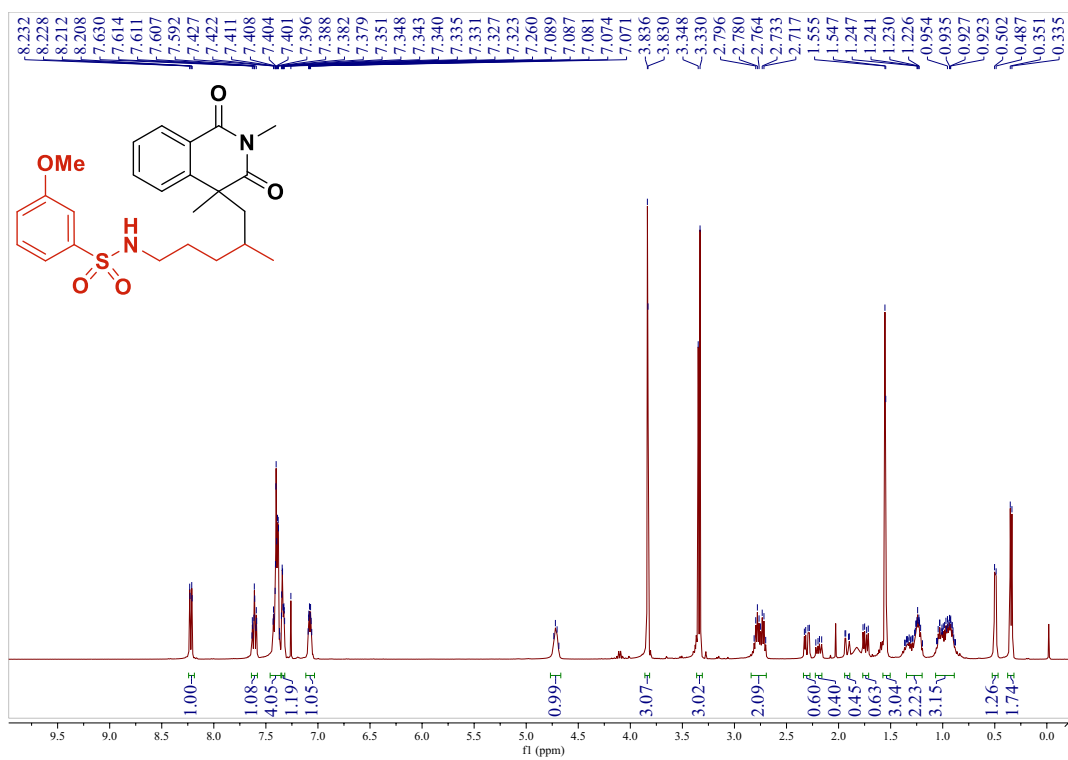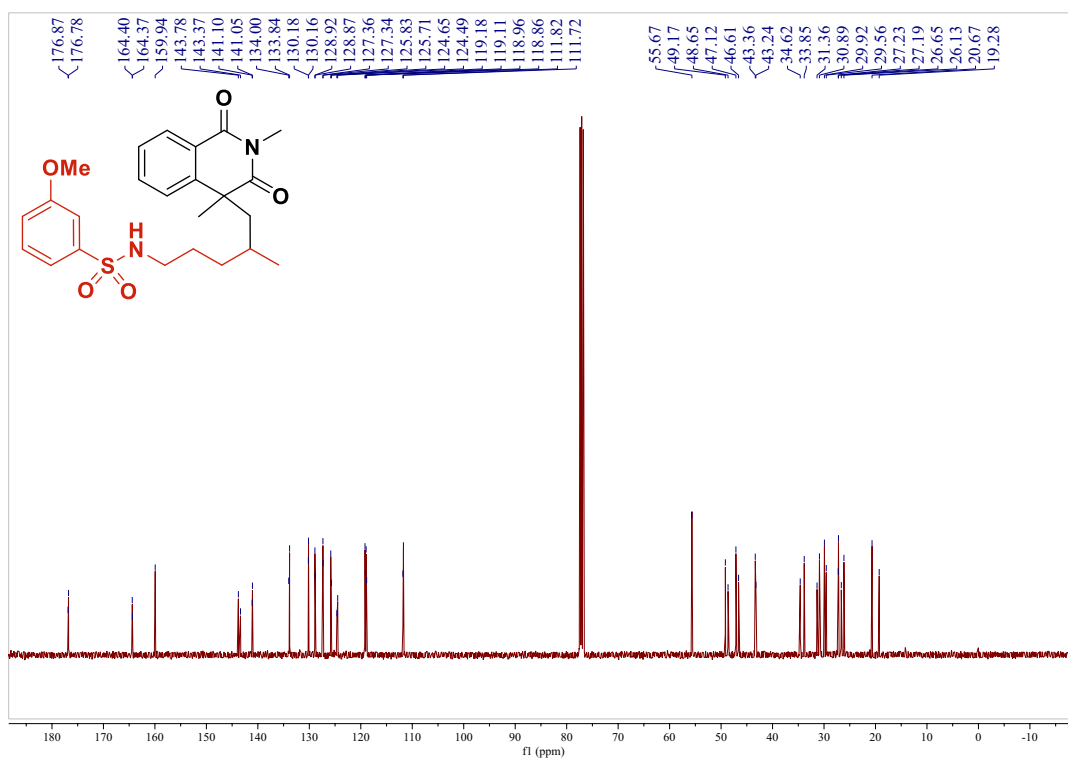

$^1\text{H}$  and  $^{13}\text{C}$  NMR spectra of **5ae**:

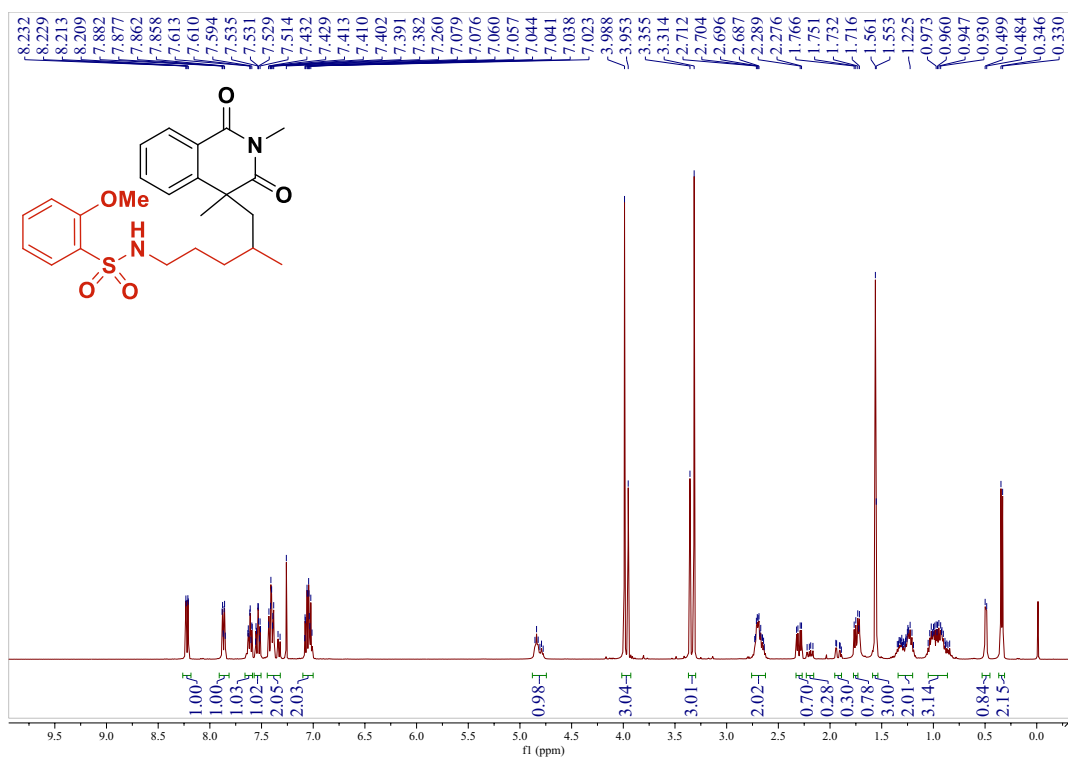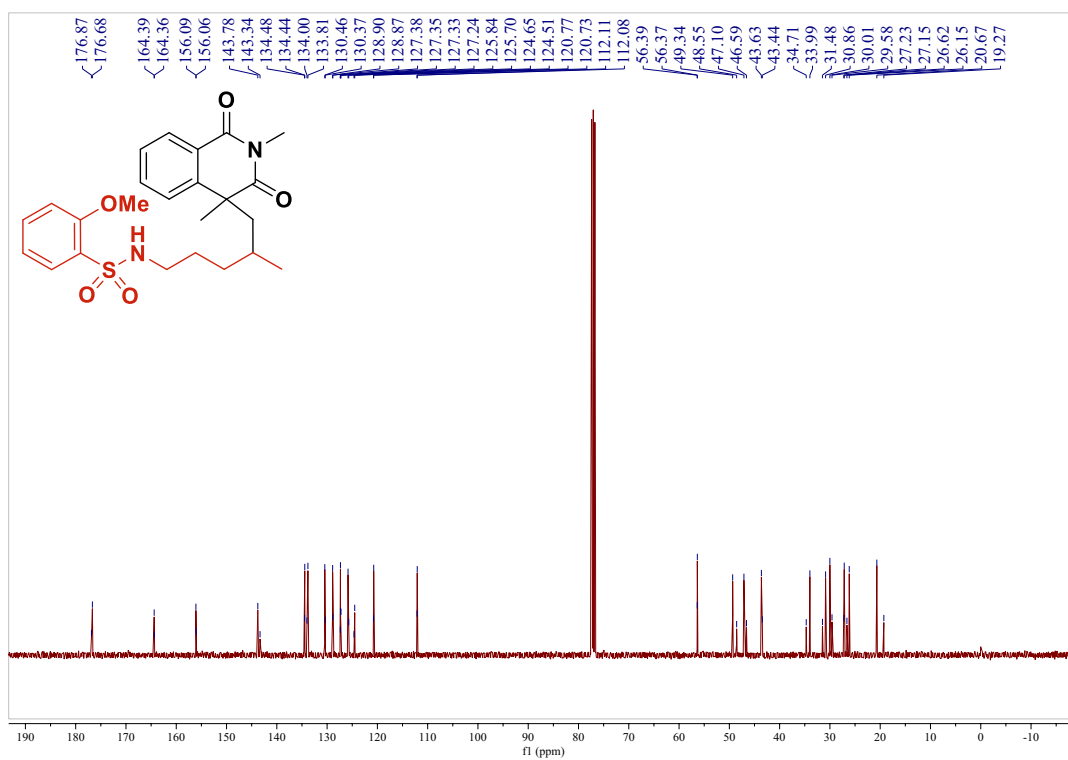

$^1\text{H}$  and  $^{13}\text{C}$  NMR spectra of **5af**:

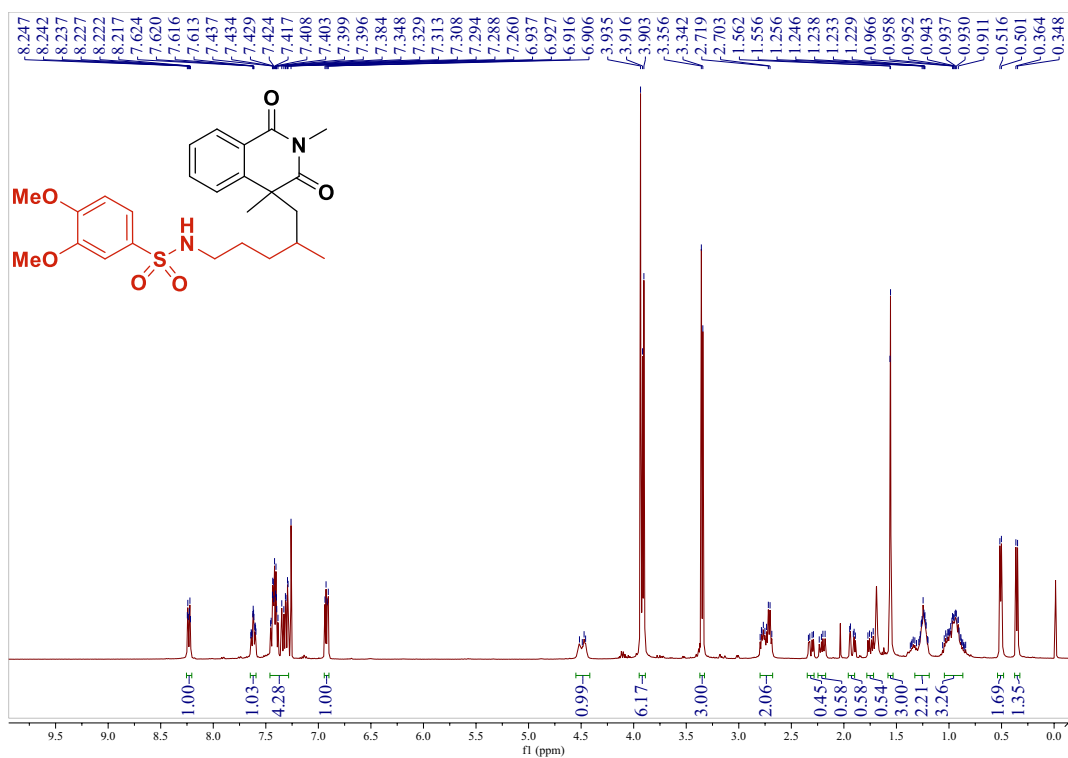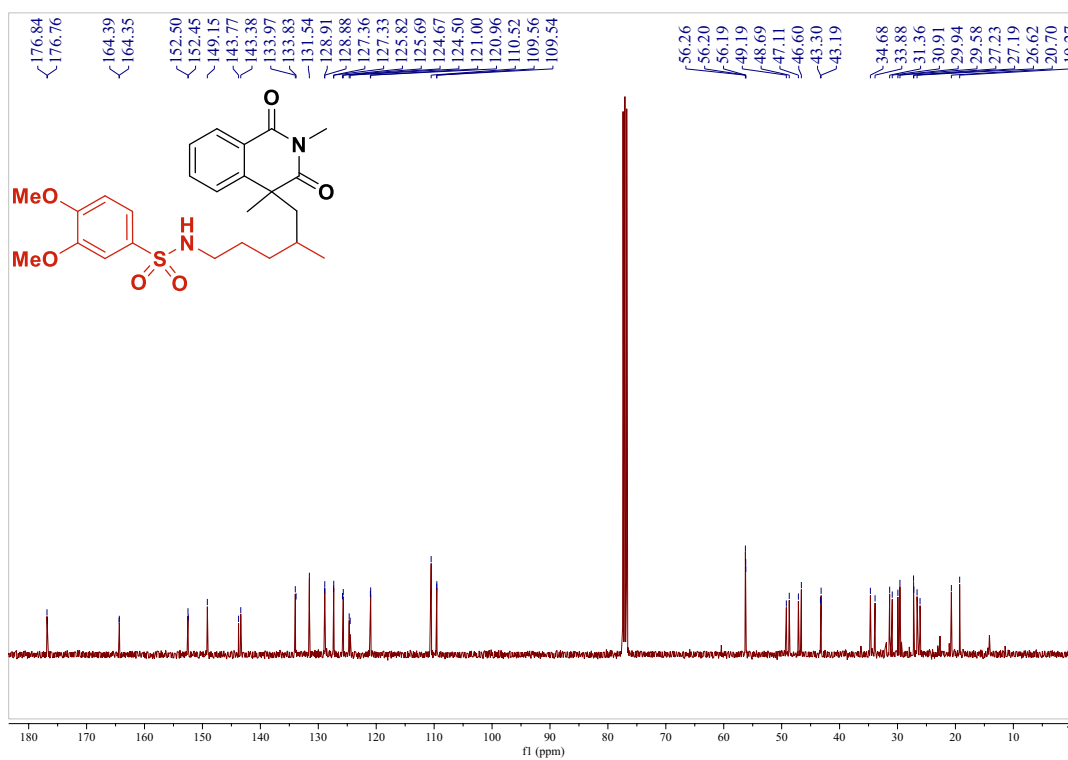

$^1\text{H}$  and  $^{13}\text{C}$  NMR spectra of **5ag**:

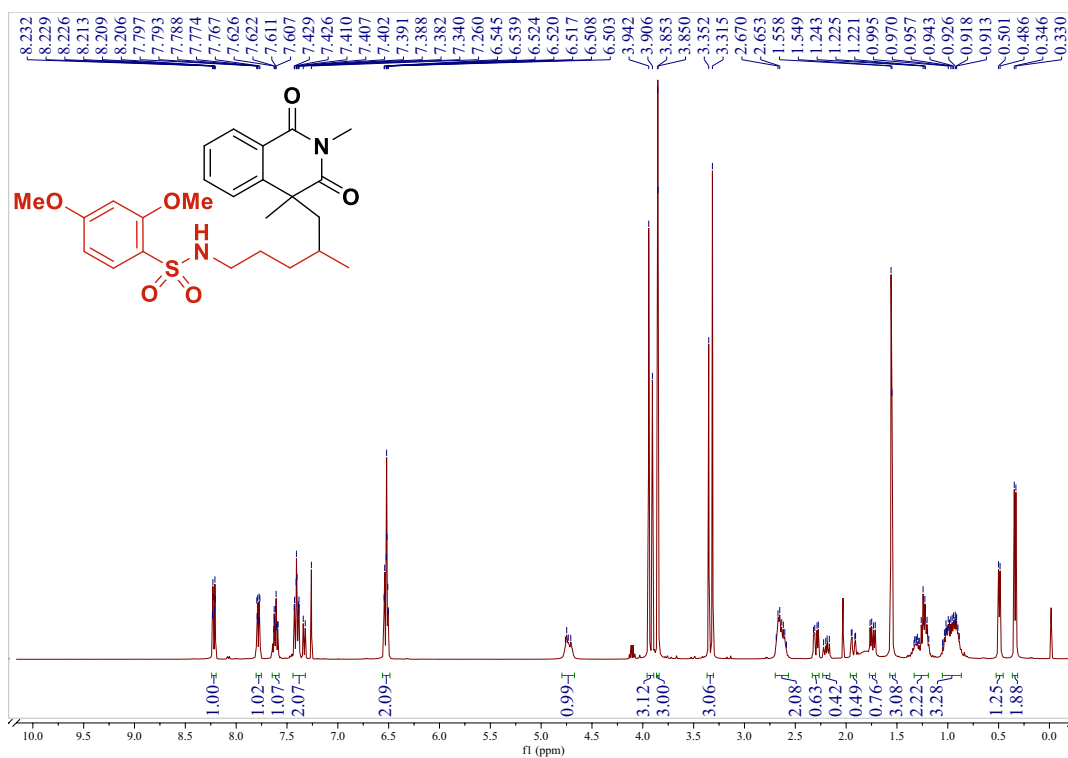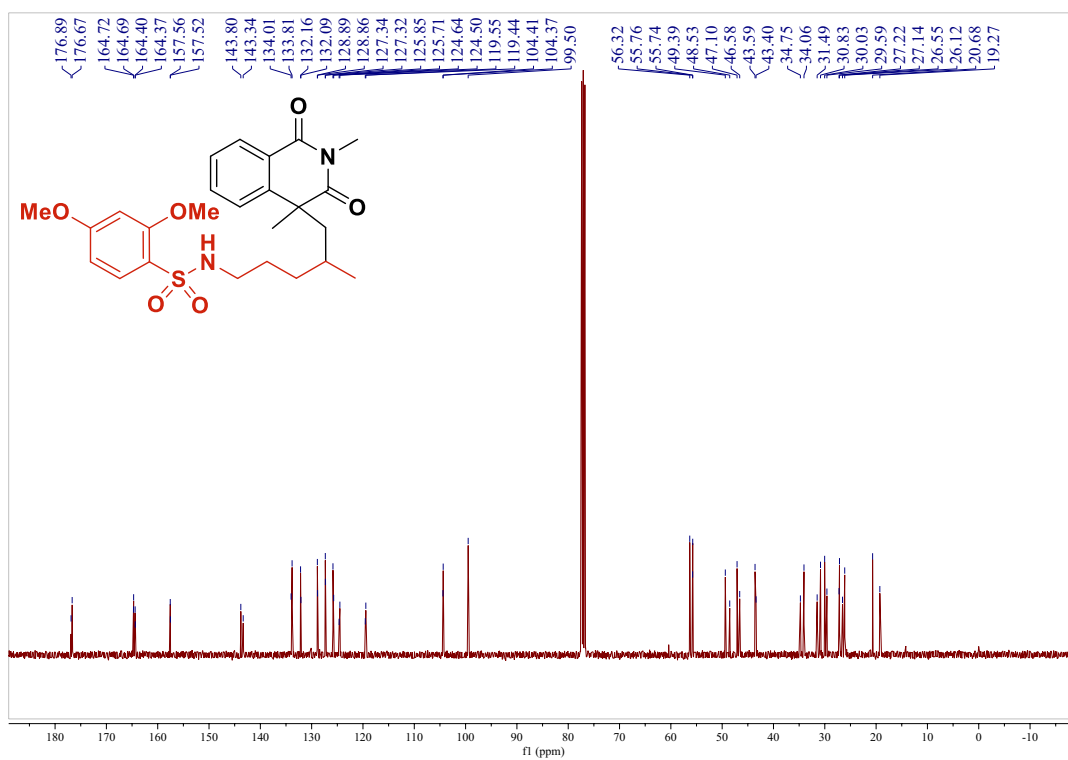

$^1\text{H}$  and  $^{13}\text{C}$  NMR spectra of **5ah**:

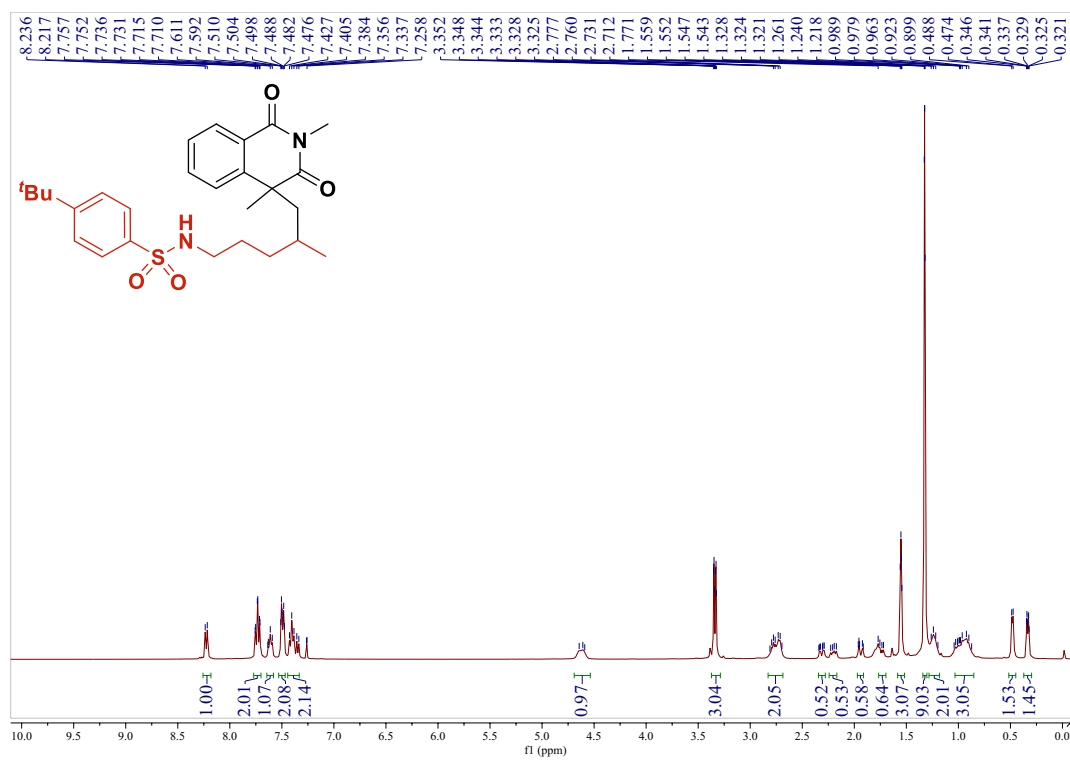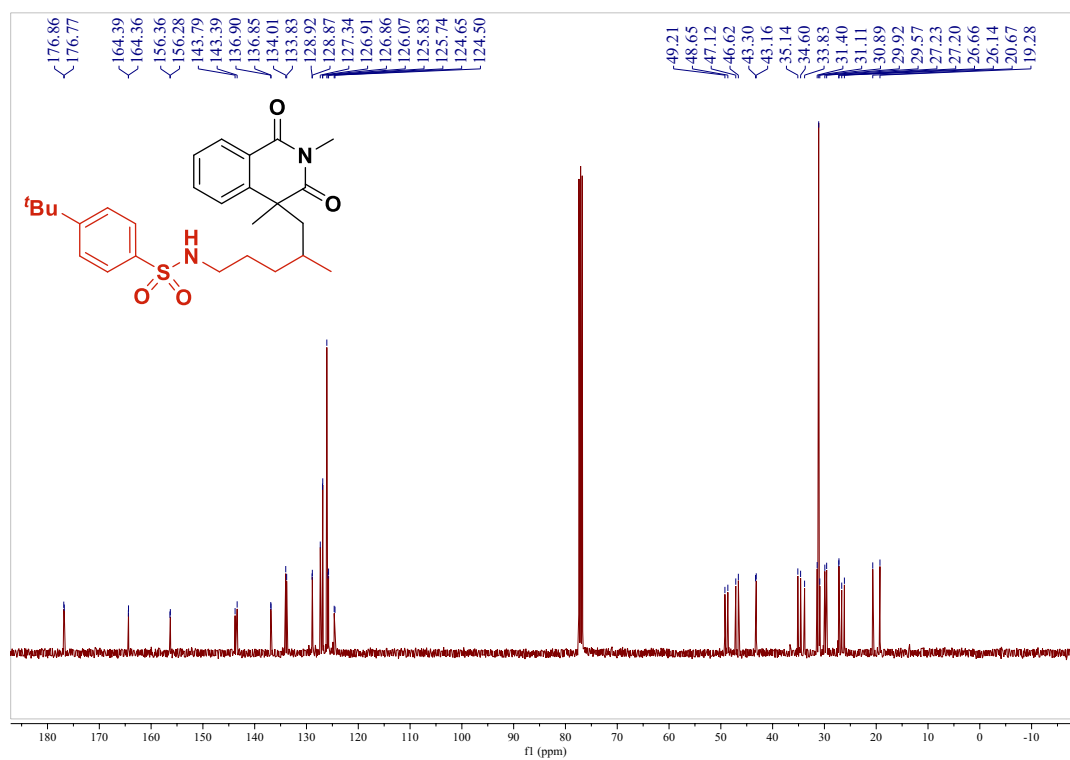



$^1\text{H}$   $^{19}\text{F}$  and  $^{13}\text{C}$  NMR spectra of **5ai**:

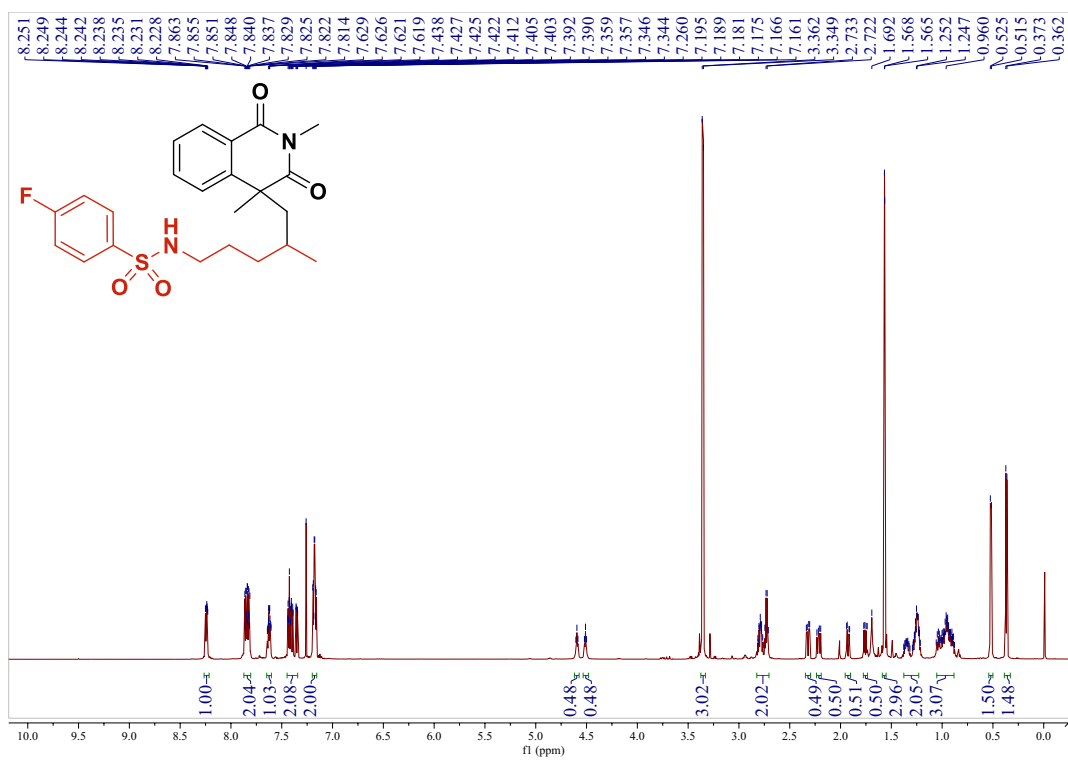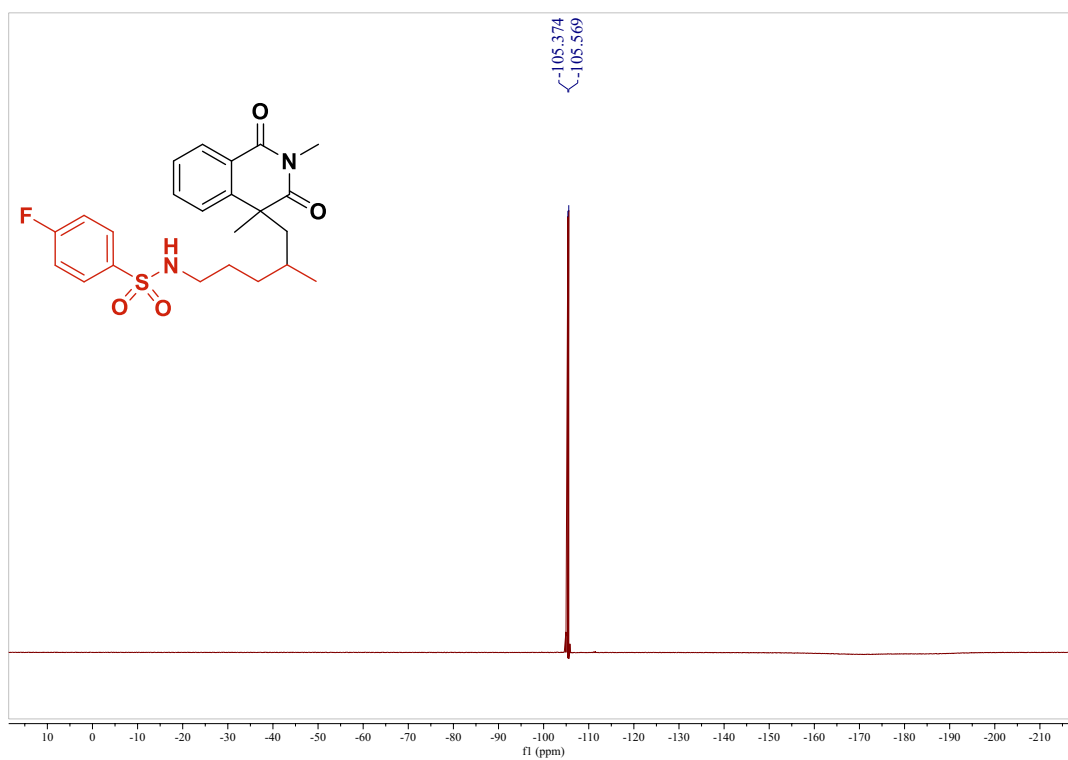

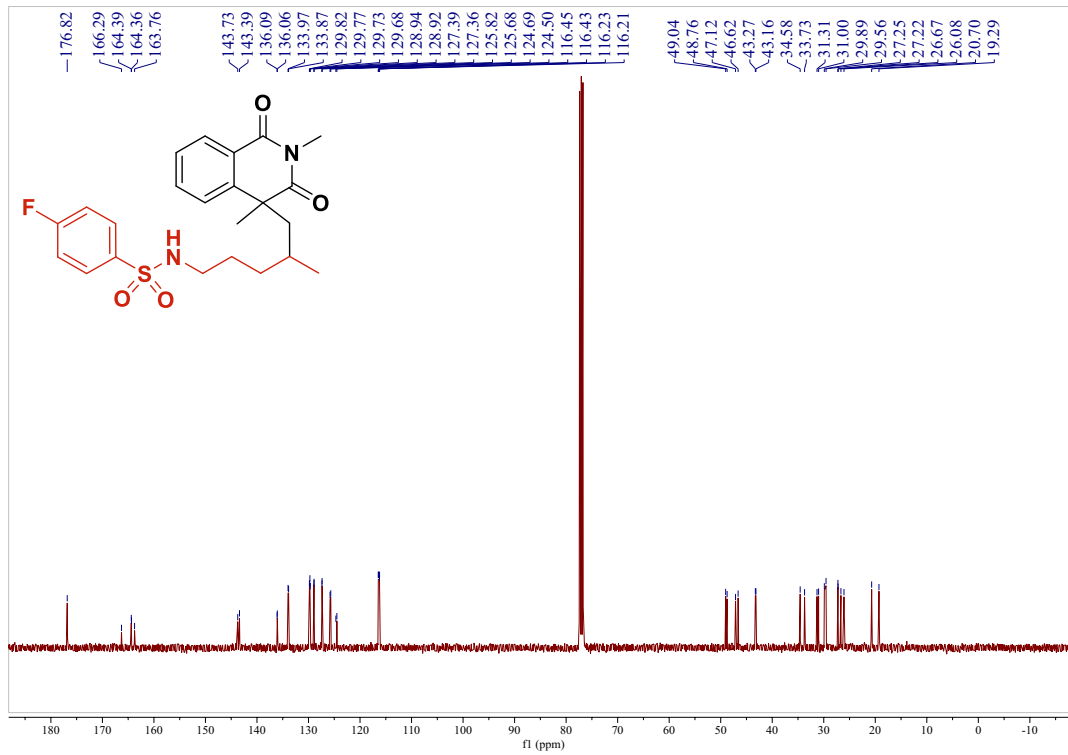

$^1\text{H}$  and  $^{13}\text{C}$  NMR spectra of **5aj**:

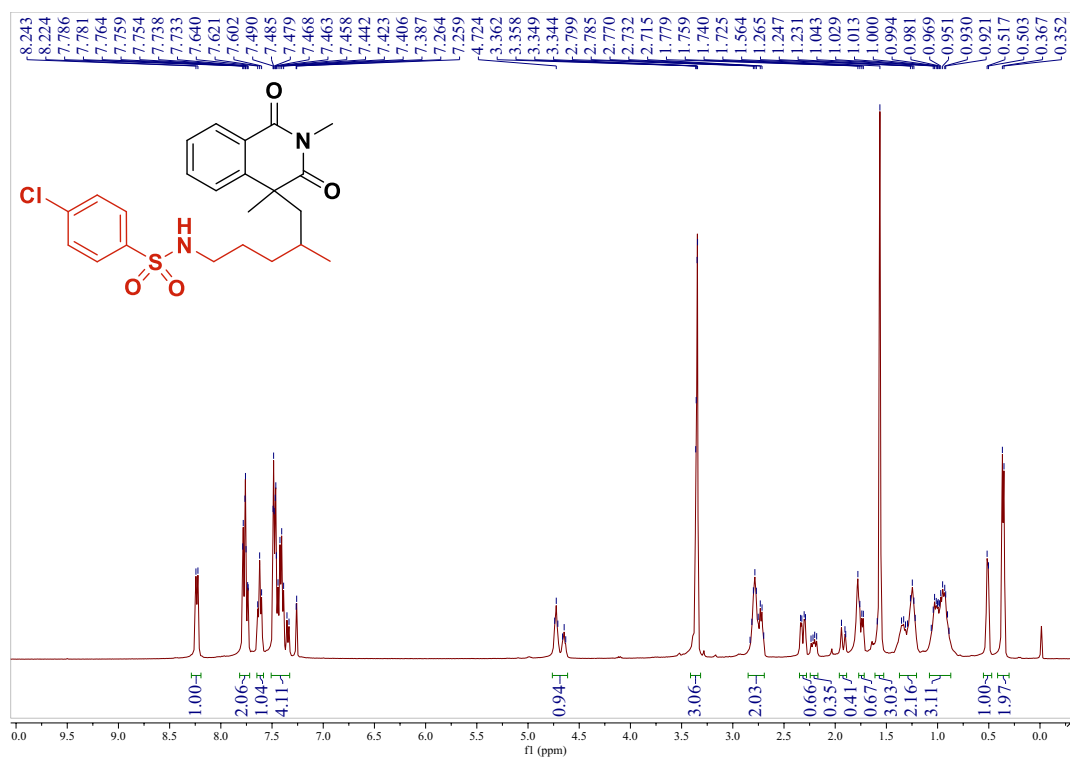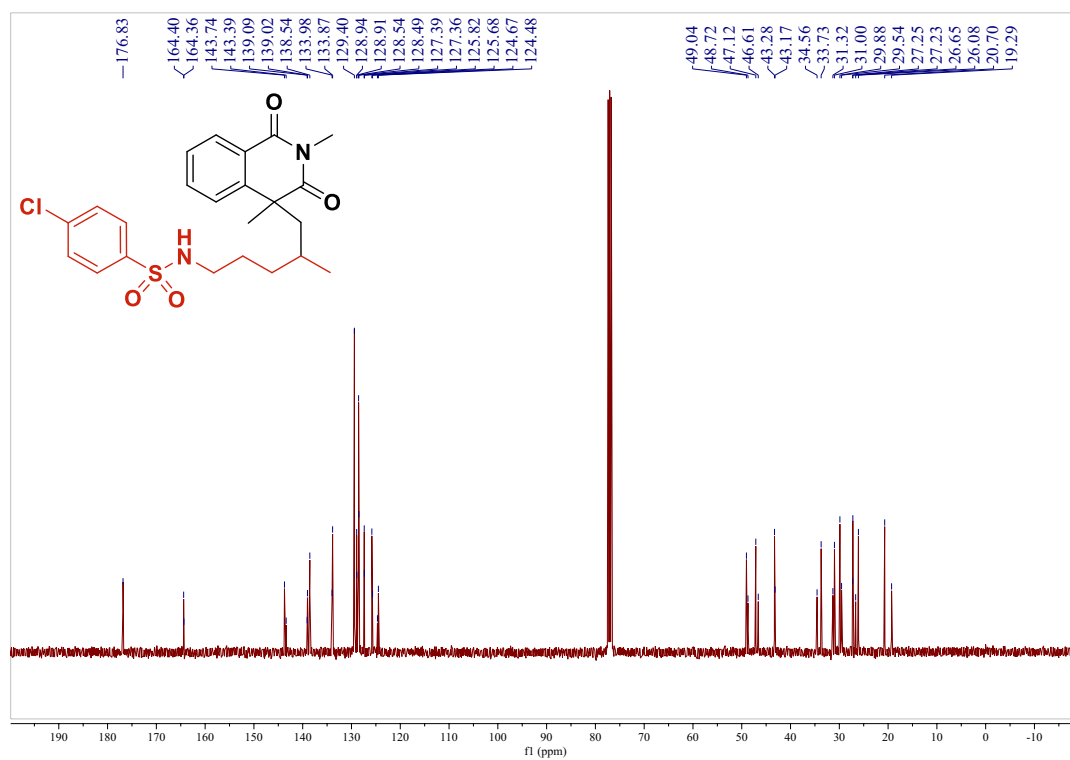

$^1\text{H}$  and  $^{13}\text{C}$  NMR spectra of **5ak**:

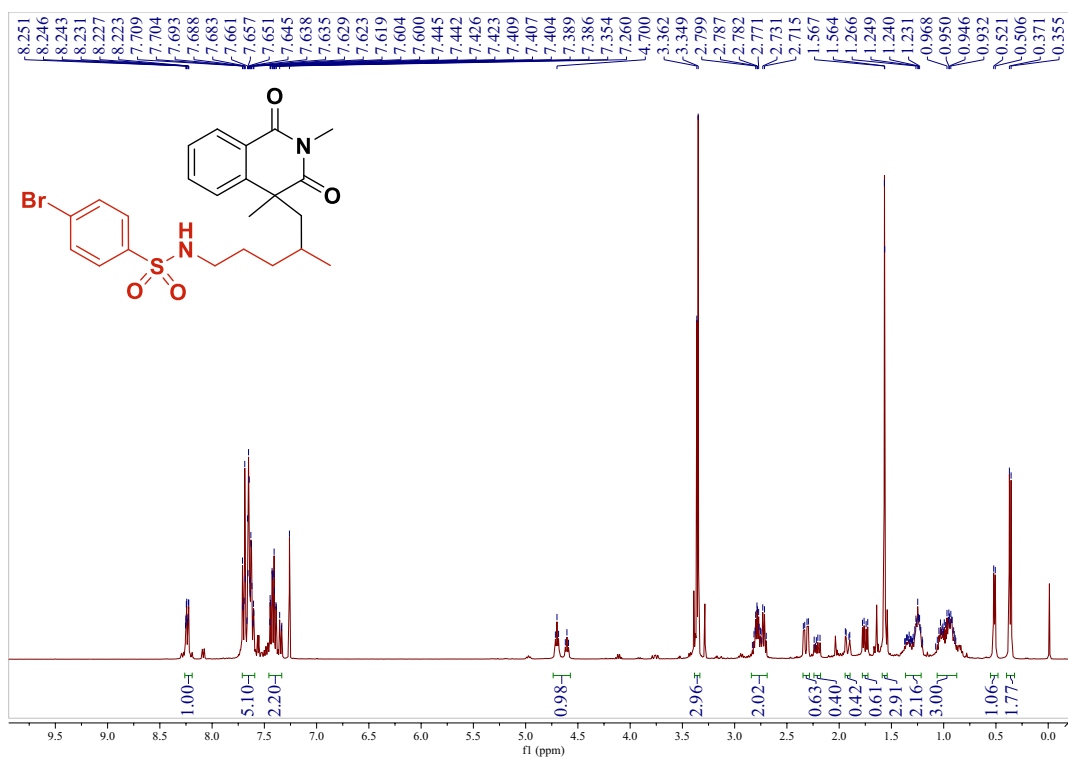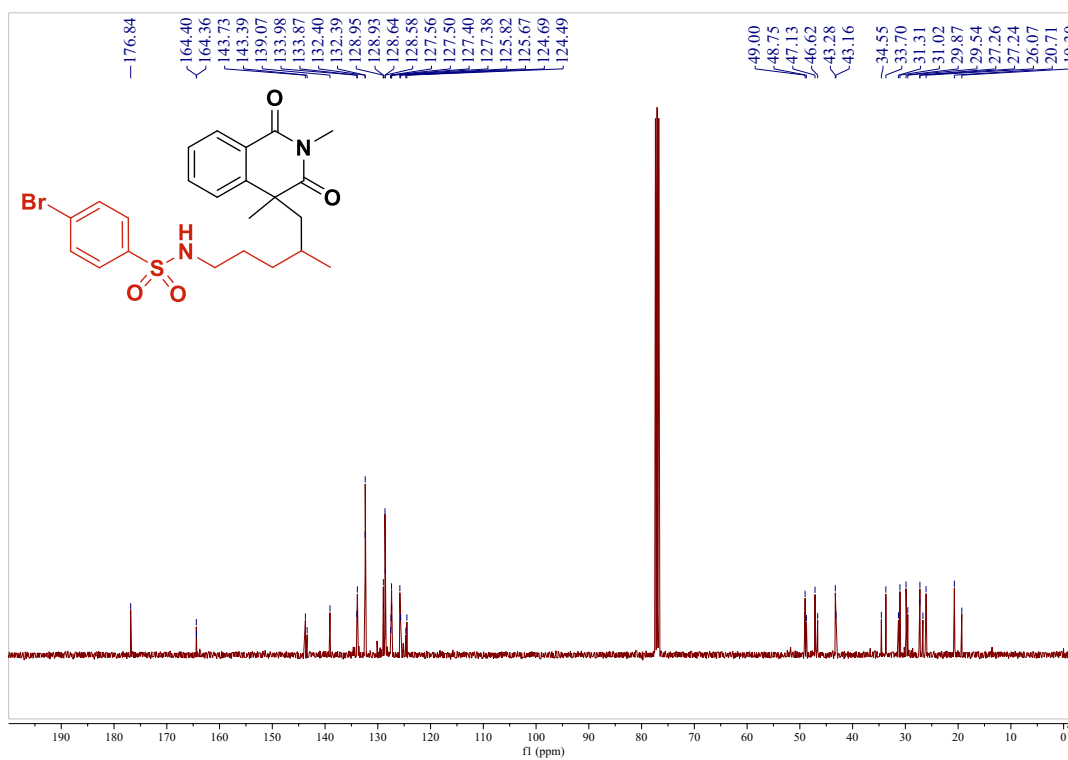

$^1\text{H}$   $^{19}\text{F}$  and  $^{13}\text{C}$  NMR spectra of **5al**:

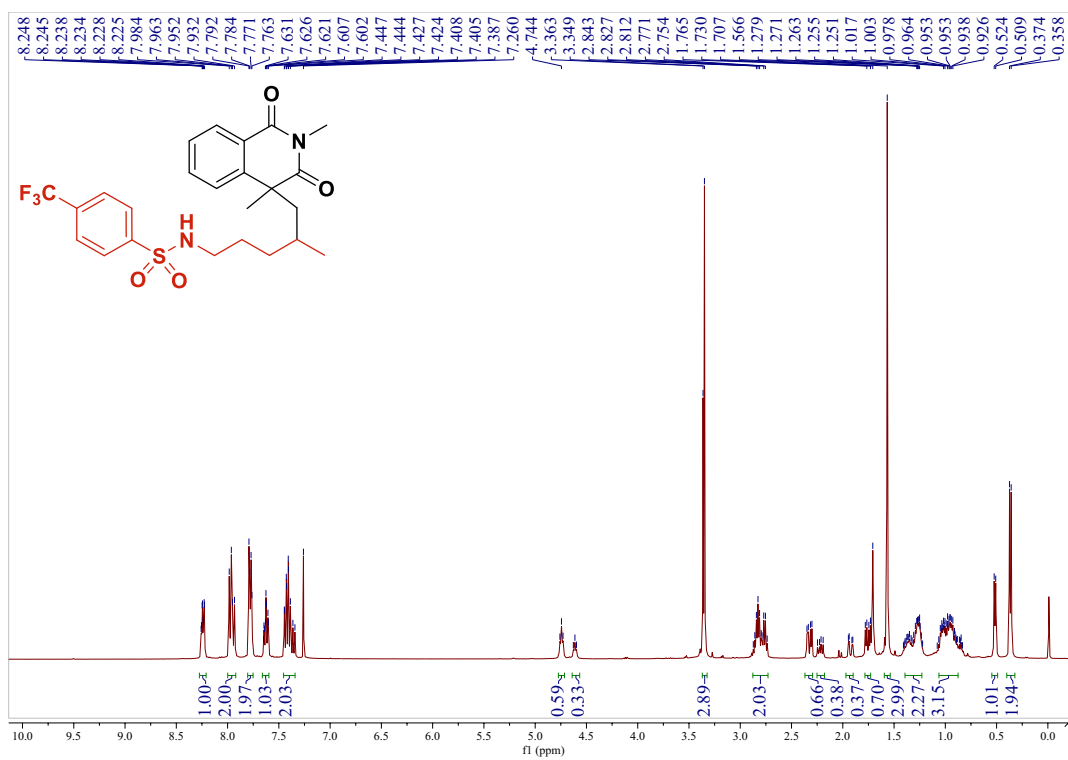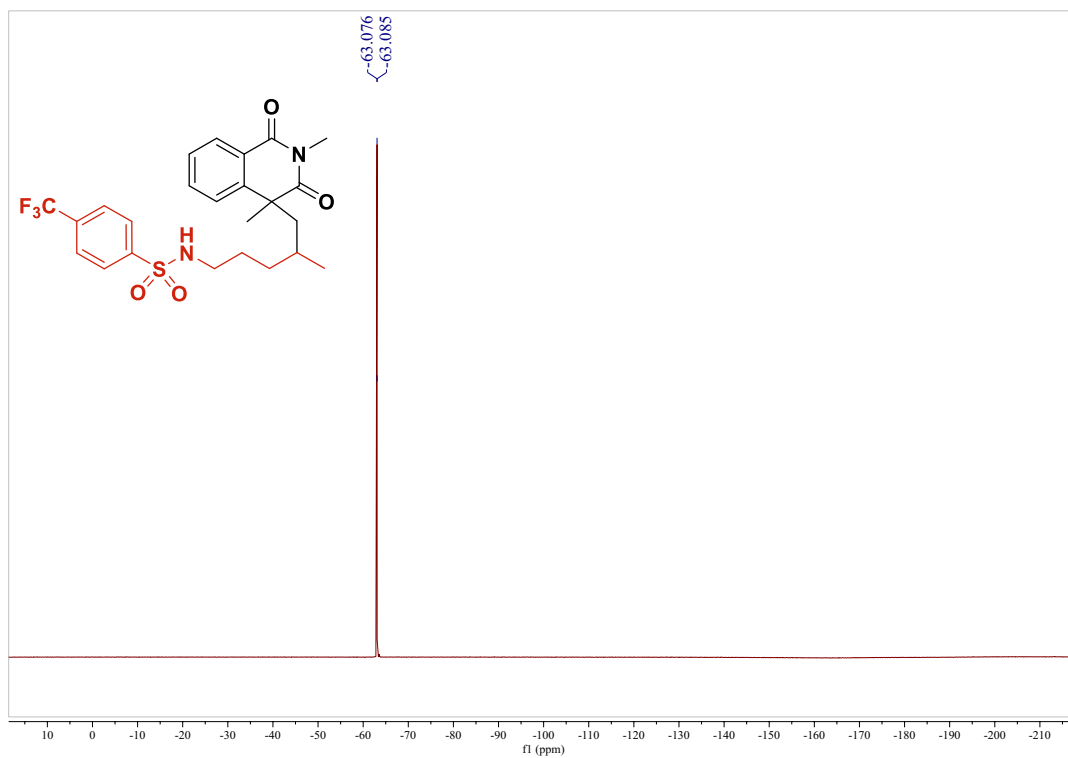

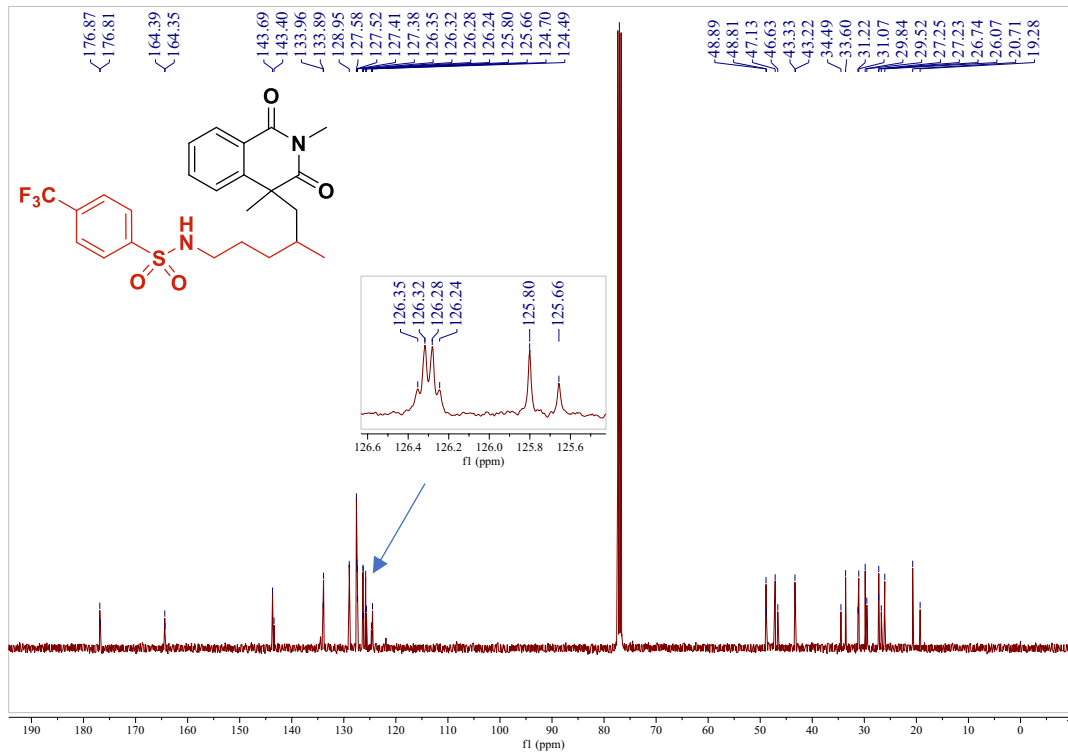

$^1\text{H}$  and  $^{13}\text{C}$  NMR spectra of **5am**:

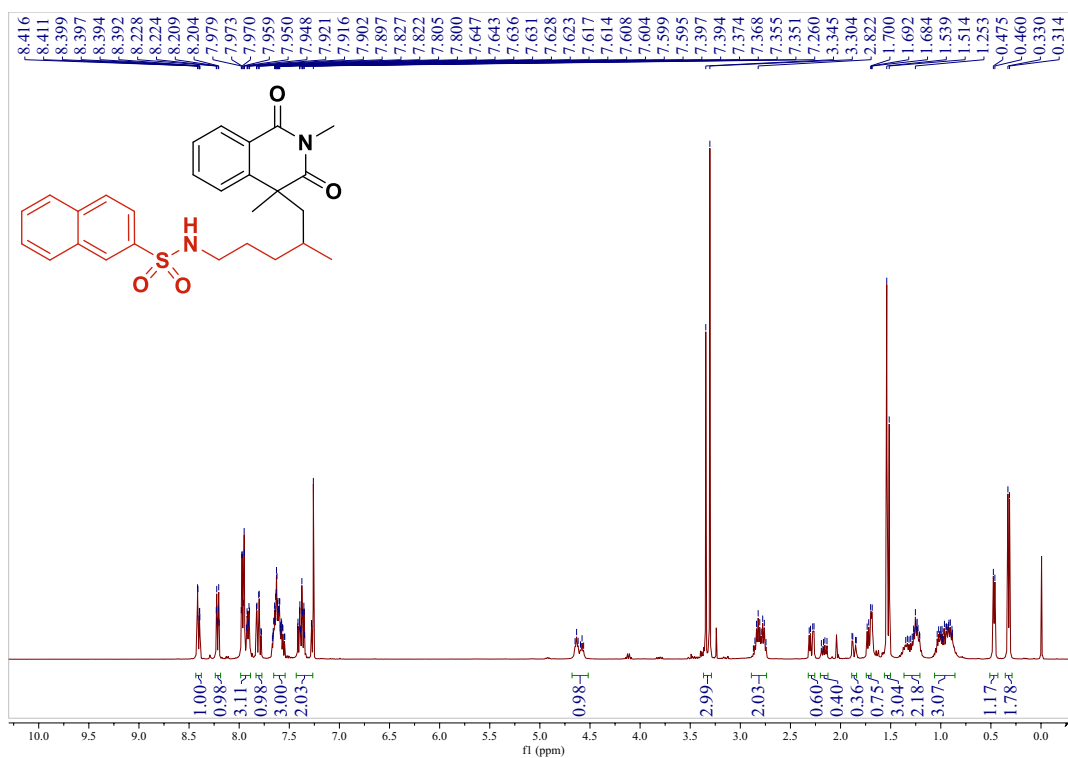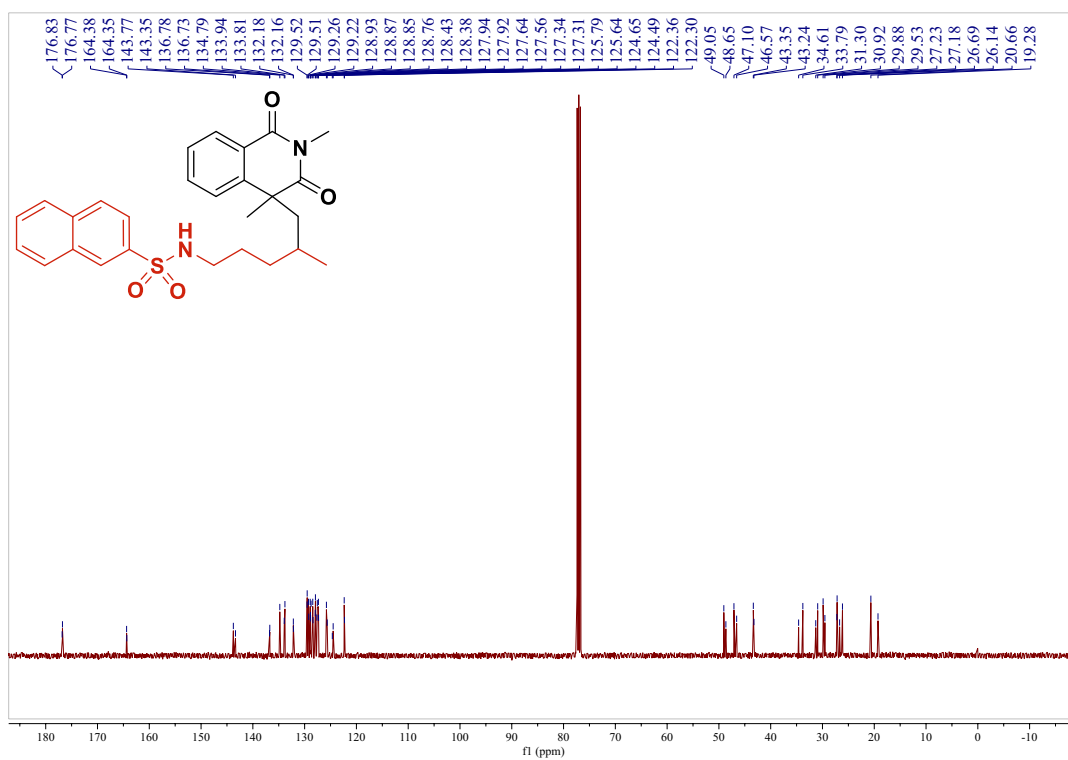

$^1\text{H}$  and  $^{13}\text{C}$  NMR spectra of **5an**:

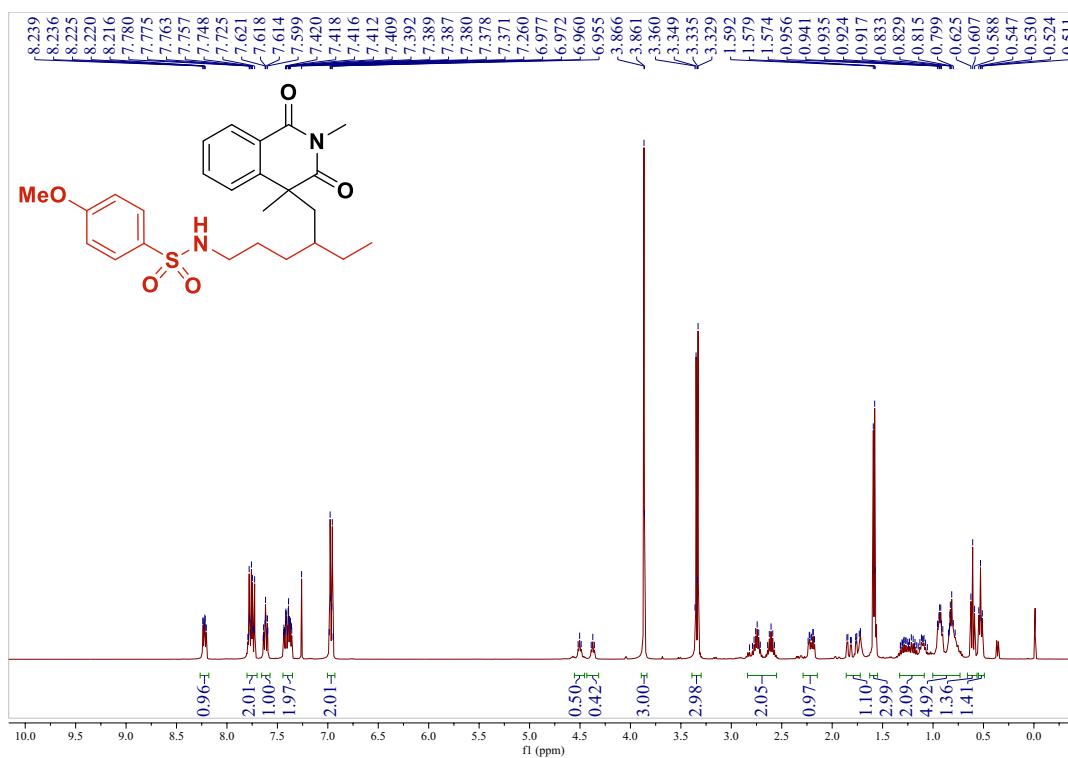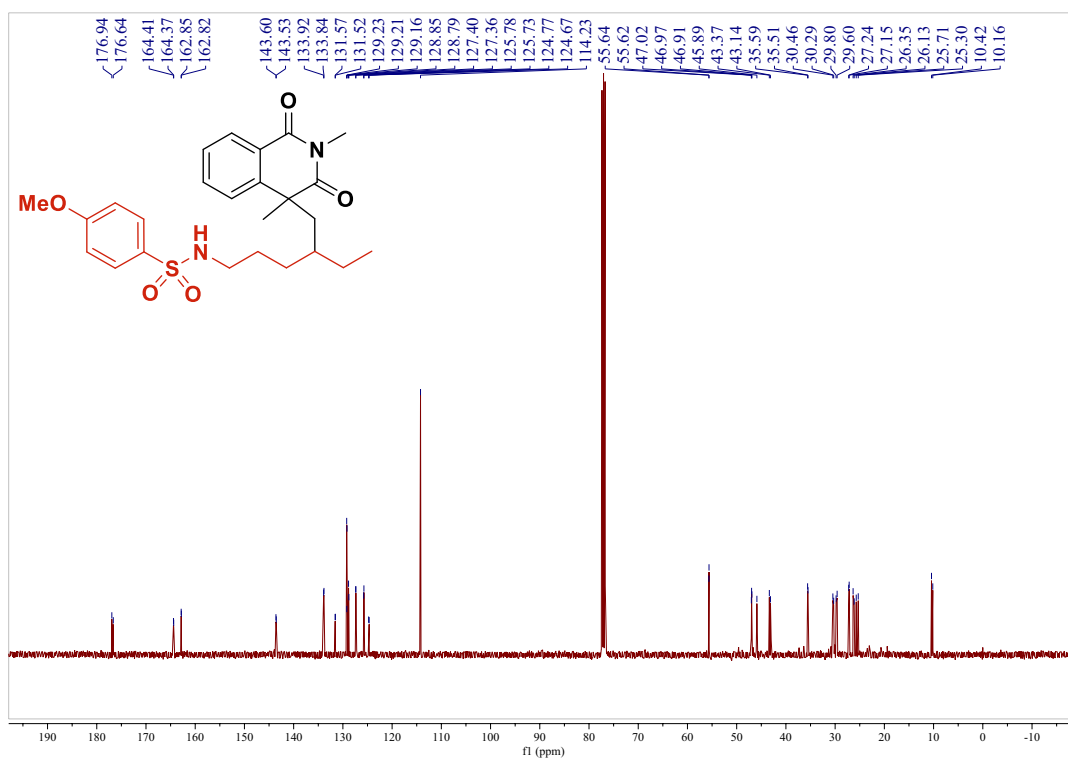



$^1\text{H}$  and  $^{13}\text{C}$  NMR spectra of **5ao**:

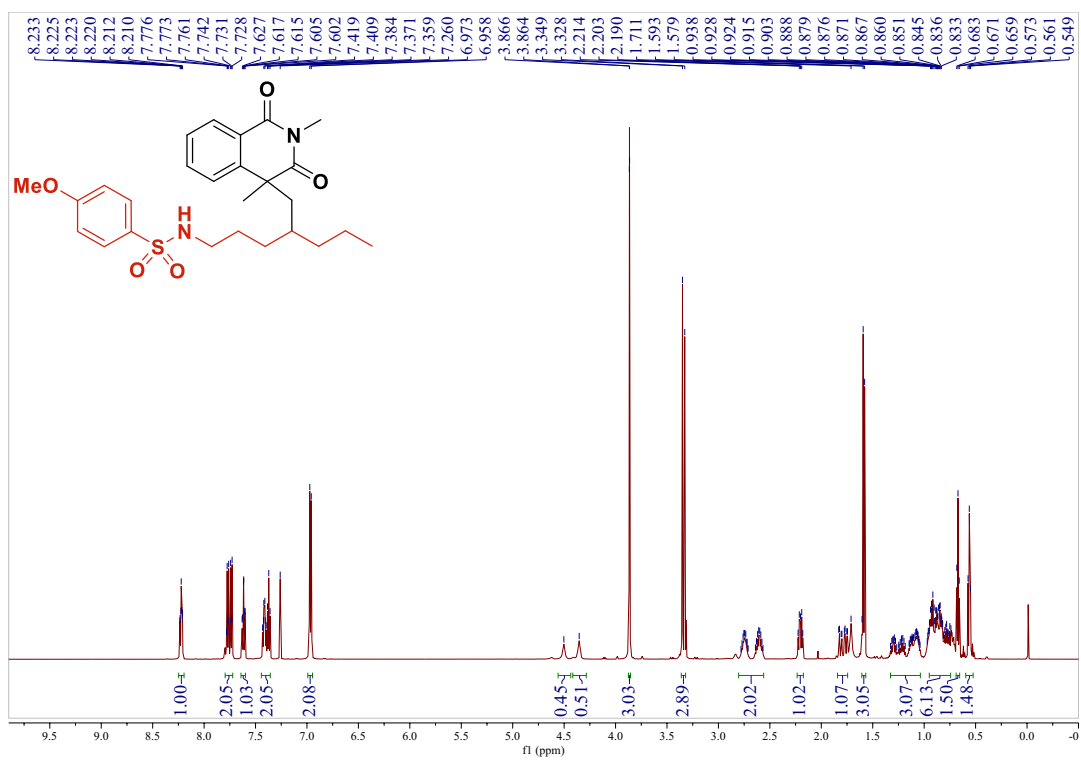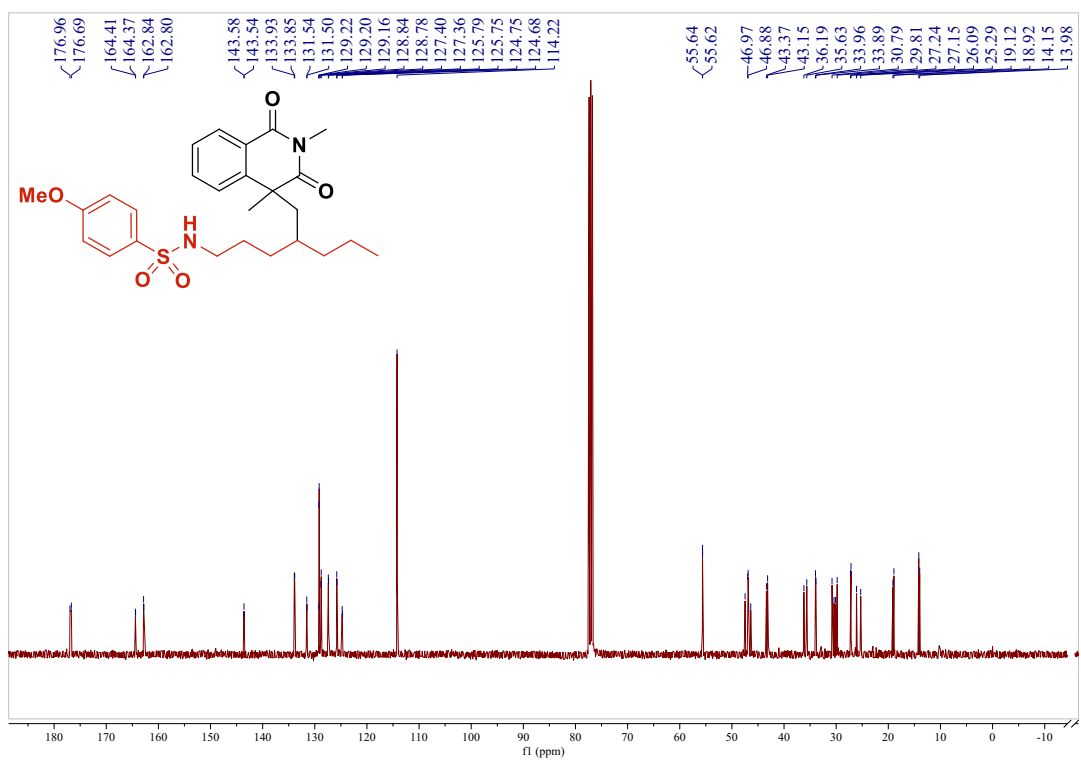

$^1\text{H}$  and  $^{13}\text{C}$  NMR spectra of **5ap**:

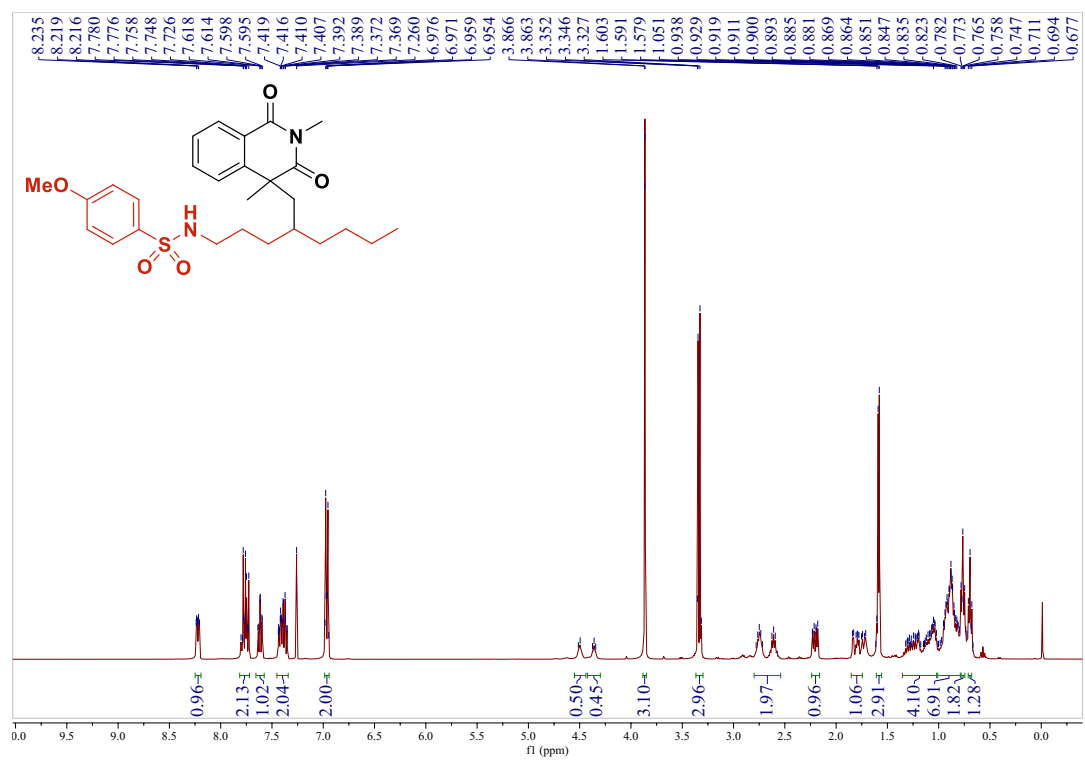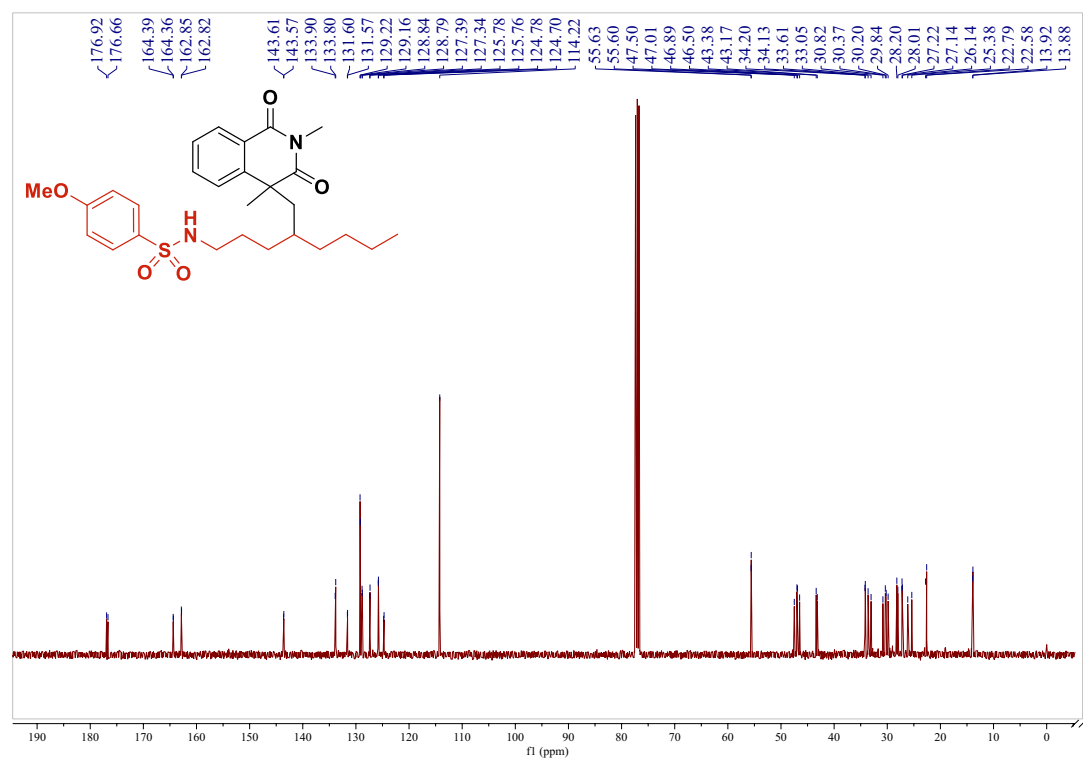

$^1\text{H}$  and  $^{13}\text{C}$  NMR spectra of 5aq:

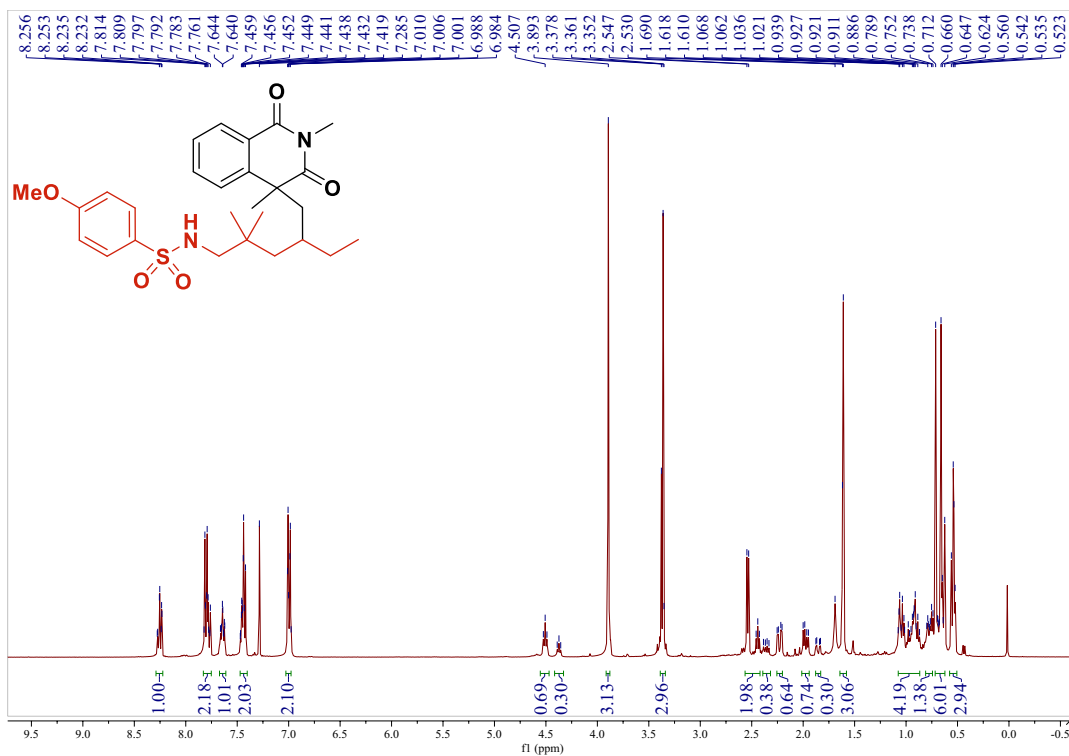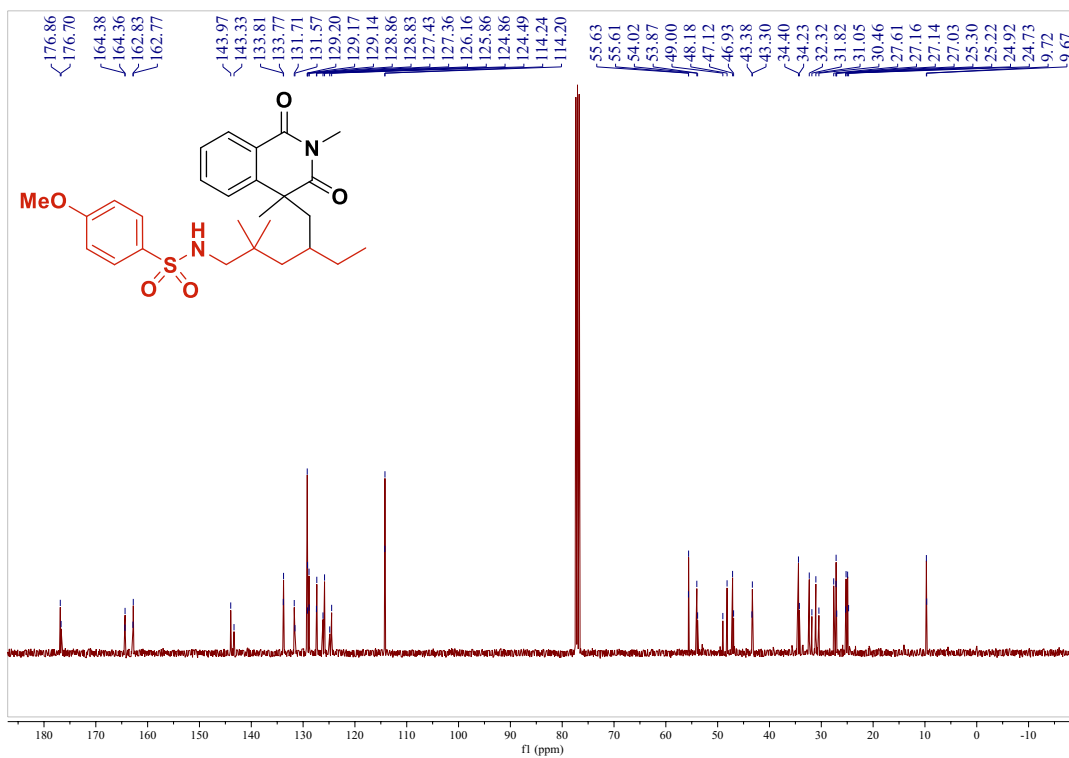

$^1\text{H}$  and  $^{13}\text{C}$  NMR spectra of **5ar**:

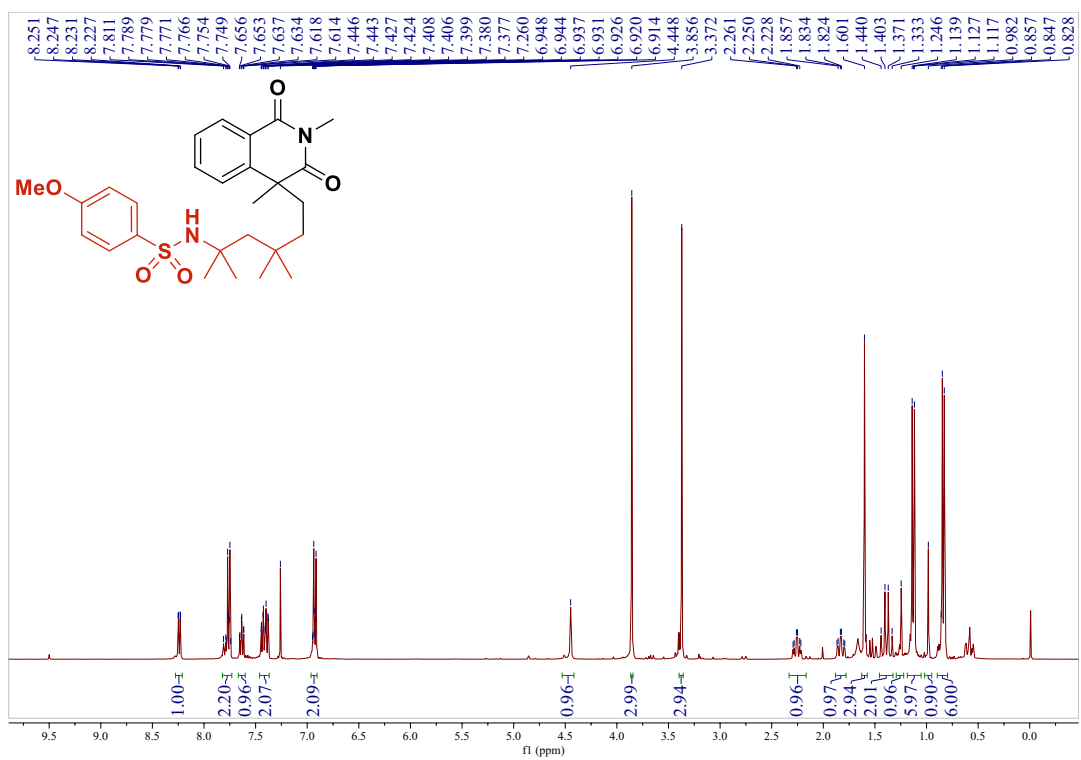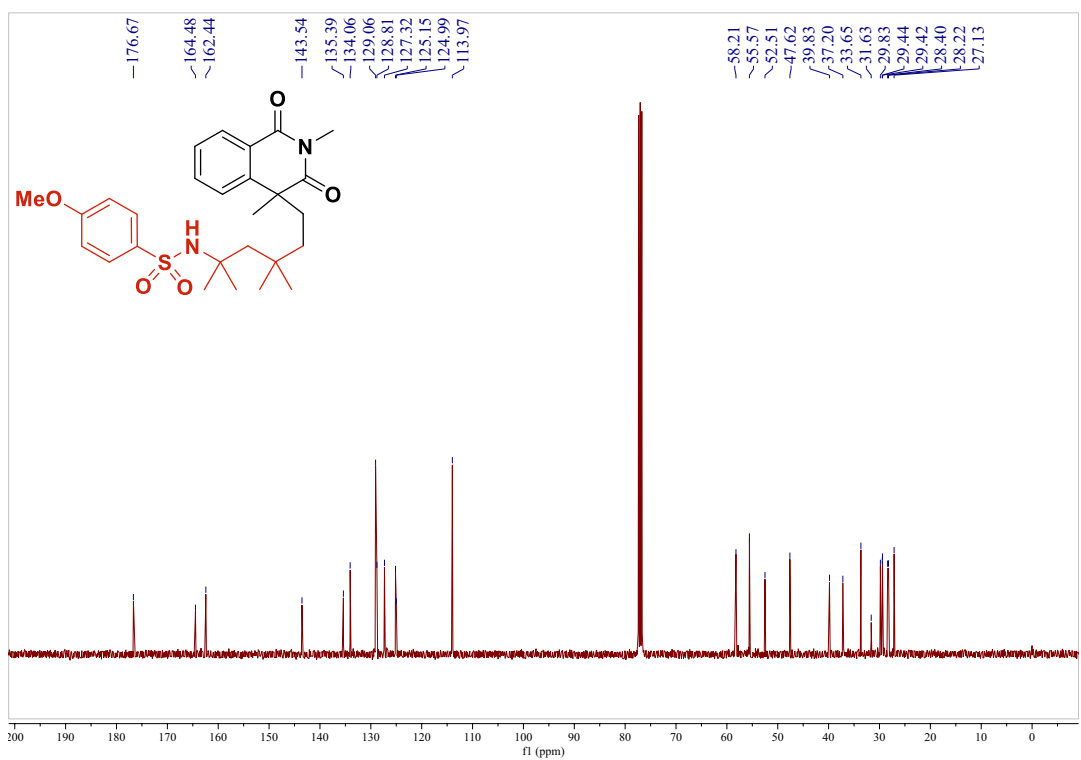

$^1\text{H}$  and  $^{13}\text{C}$  NMR spectra of **5as**:

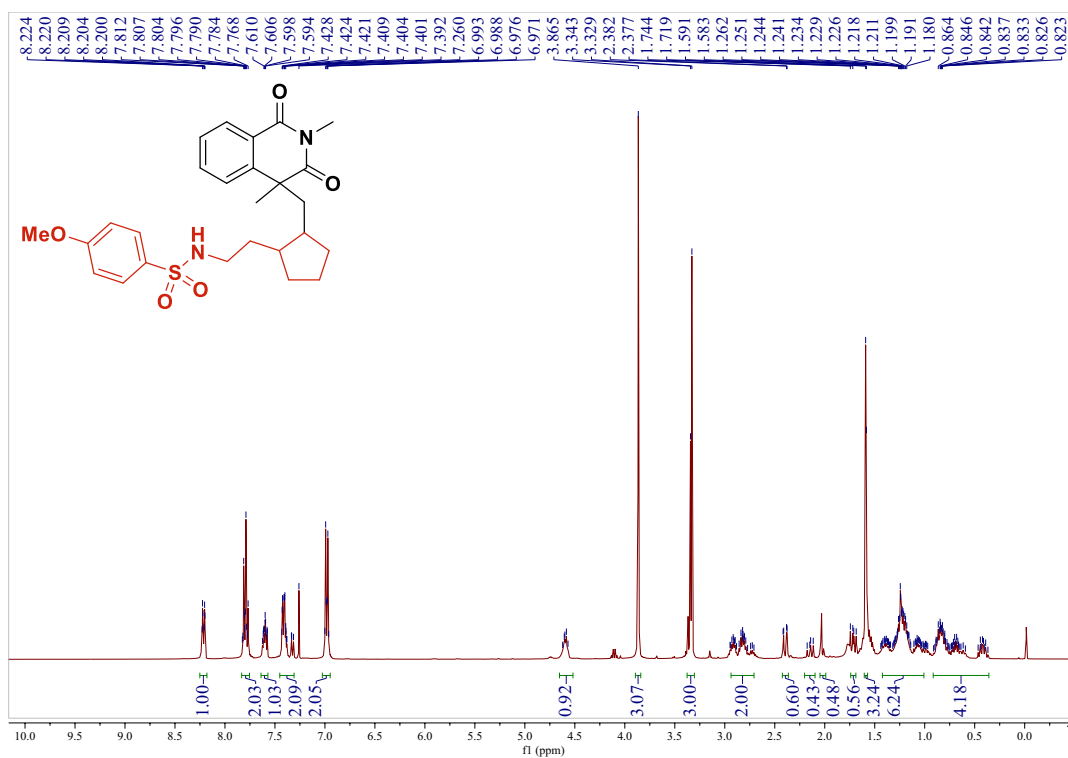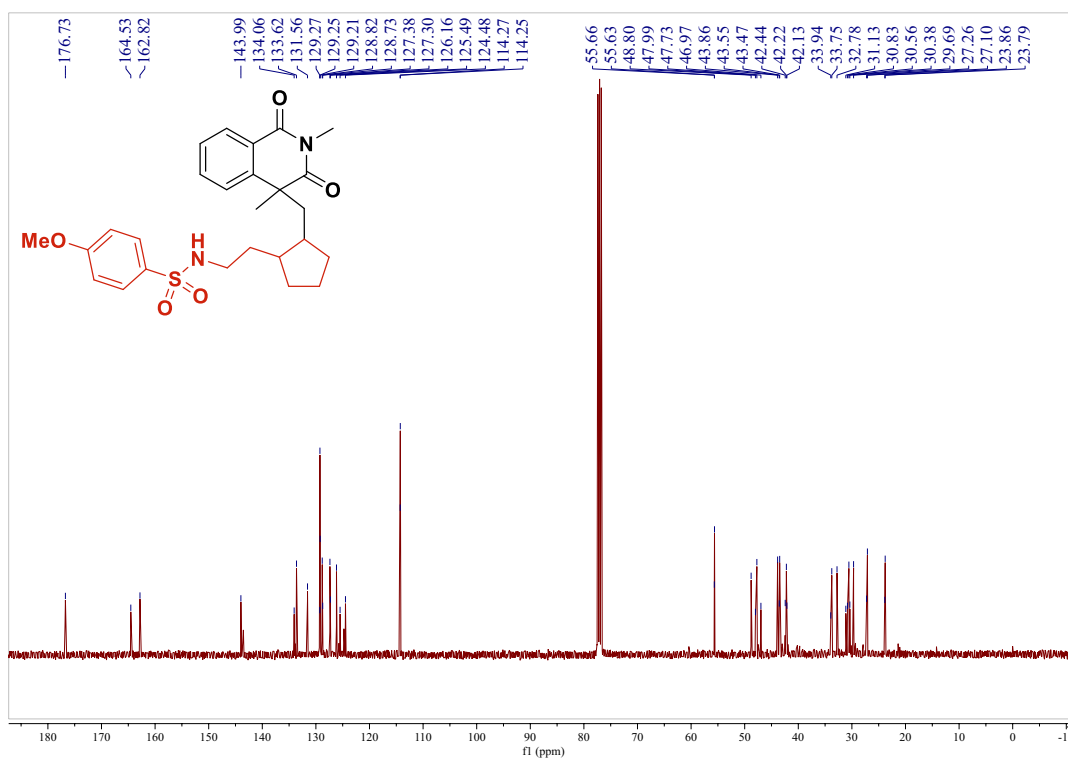

$^1\text{H}$  and  $^{13}\text{C}$  NMR spectra of **5at**:

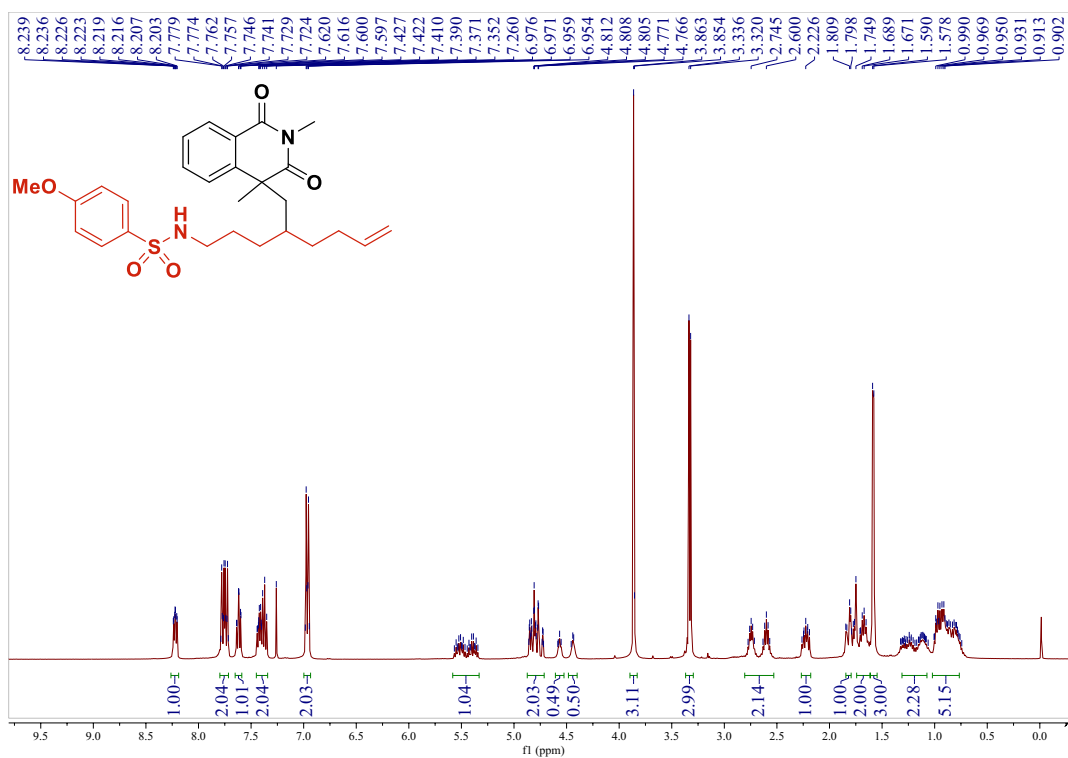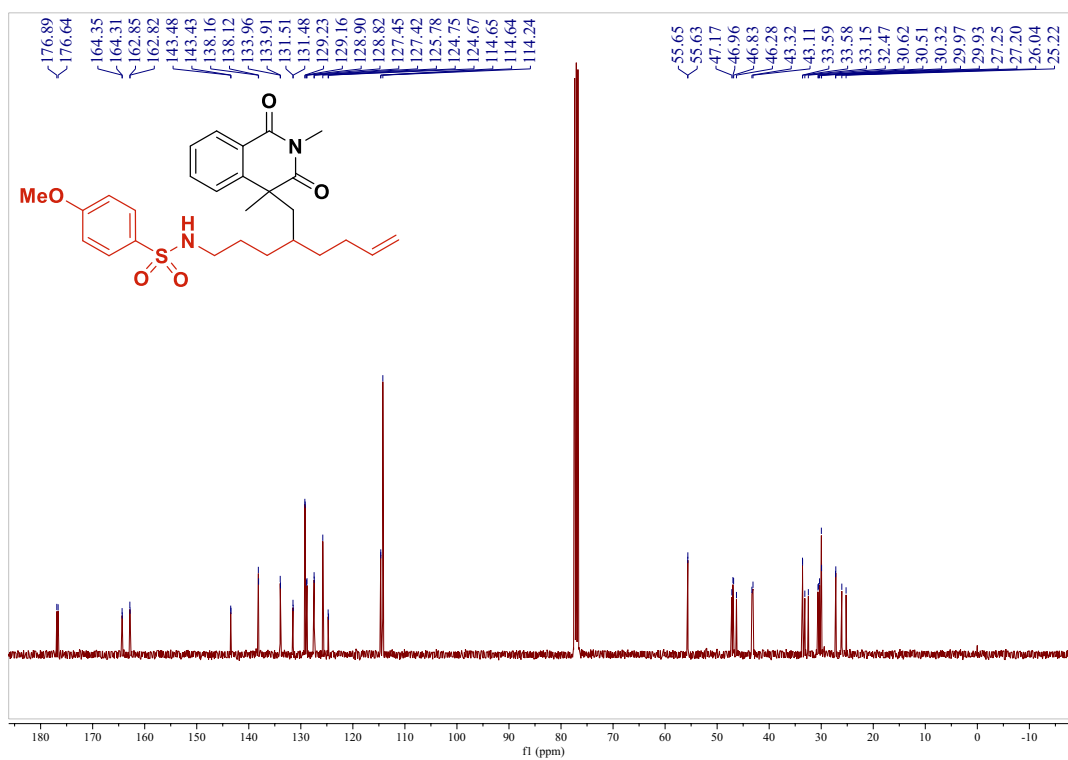

$^1\text{H}$  and  $^{13}\text{C}$  NMR spectra of **5au**:

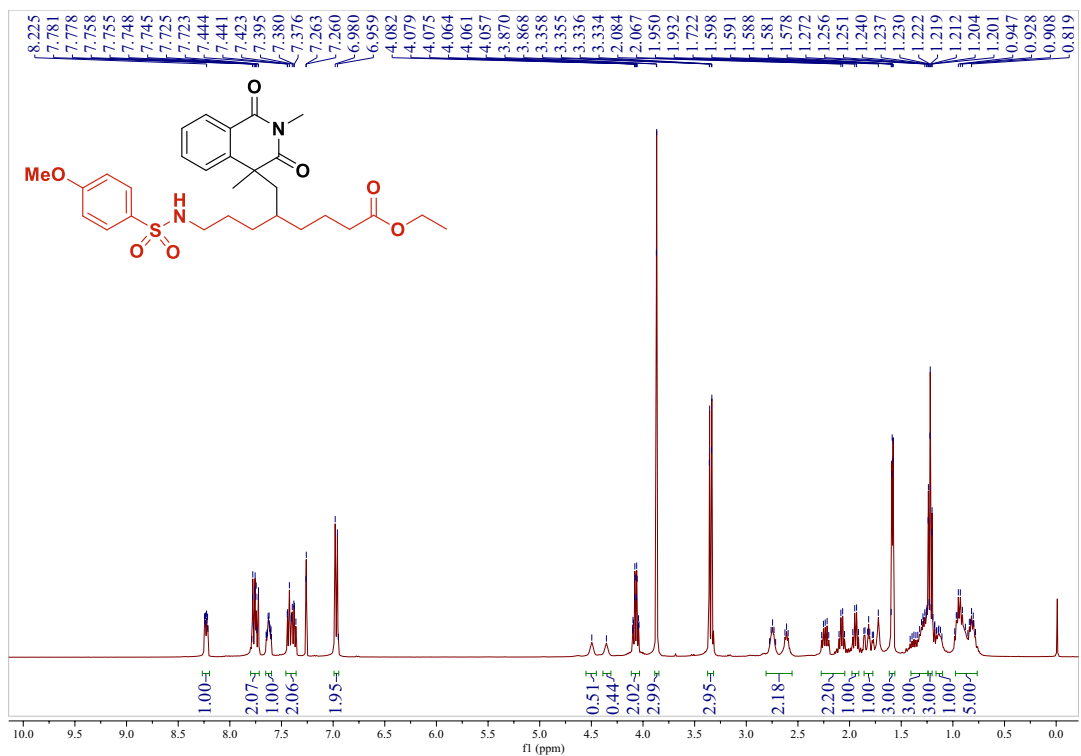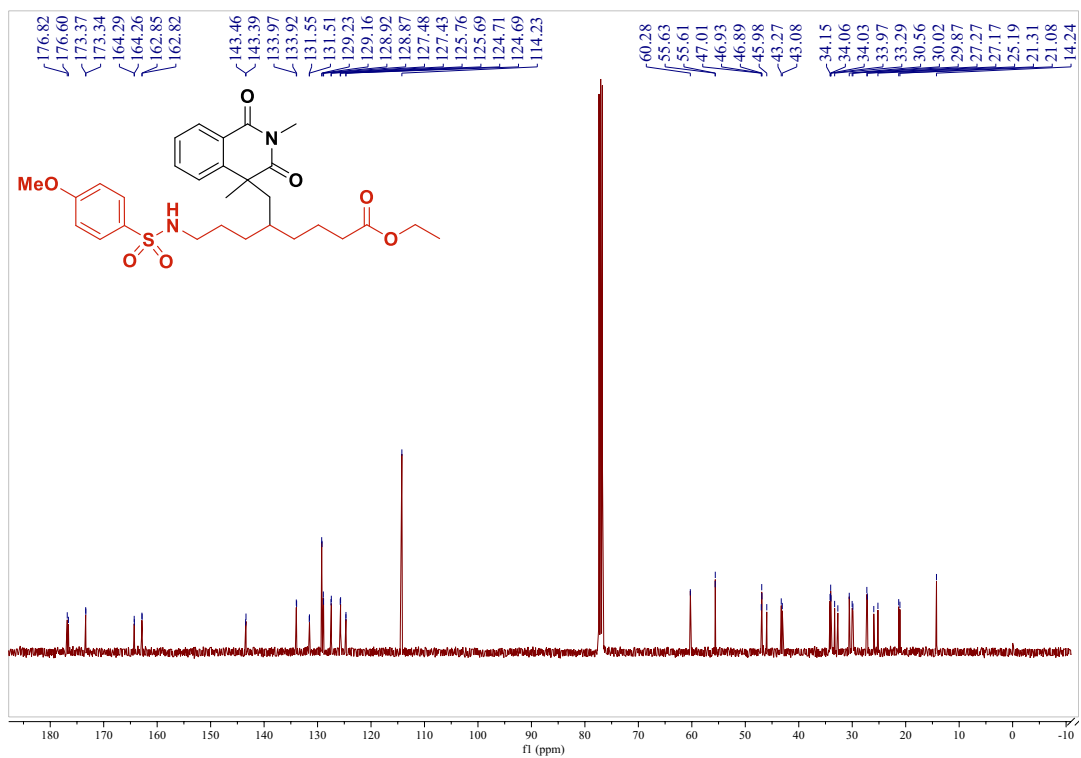

$^1\text{H}$  and  $^{13}\text{C}$  NMR spectra of **5av**:

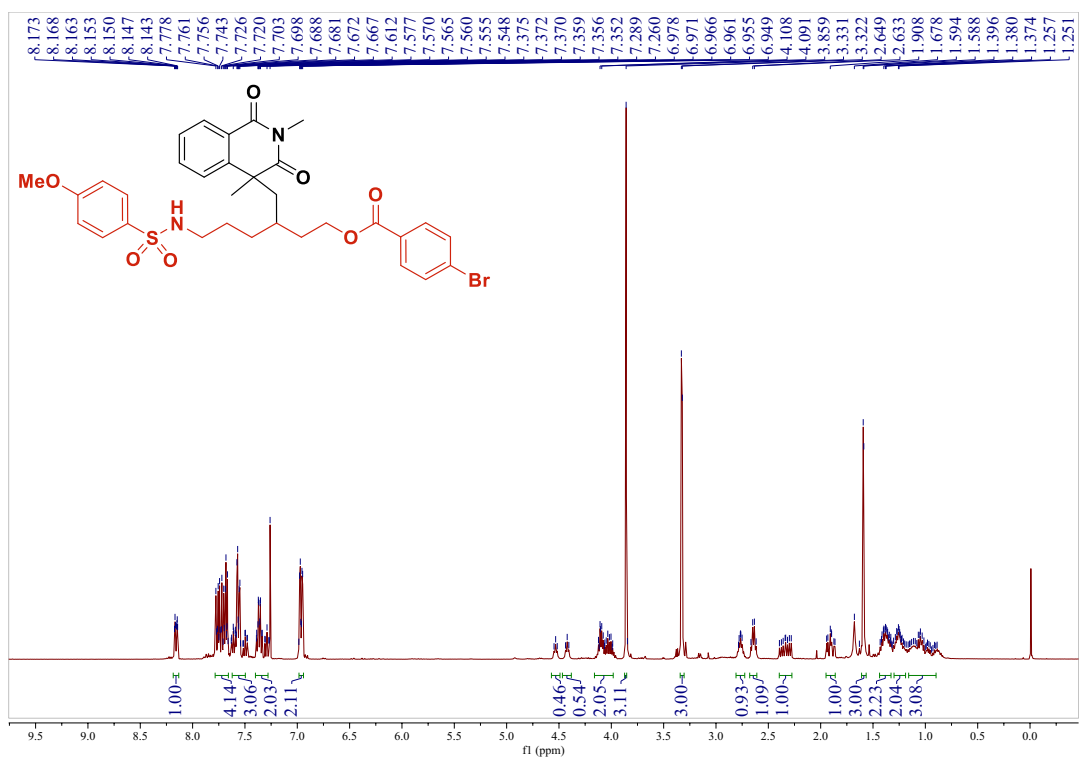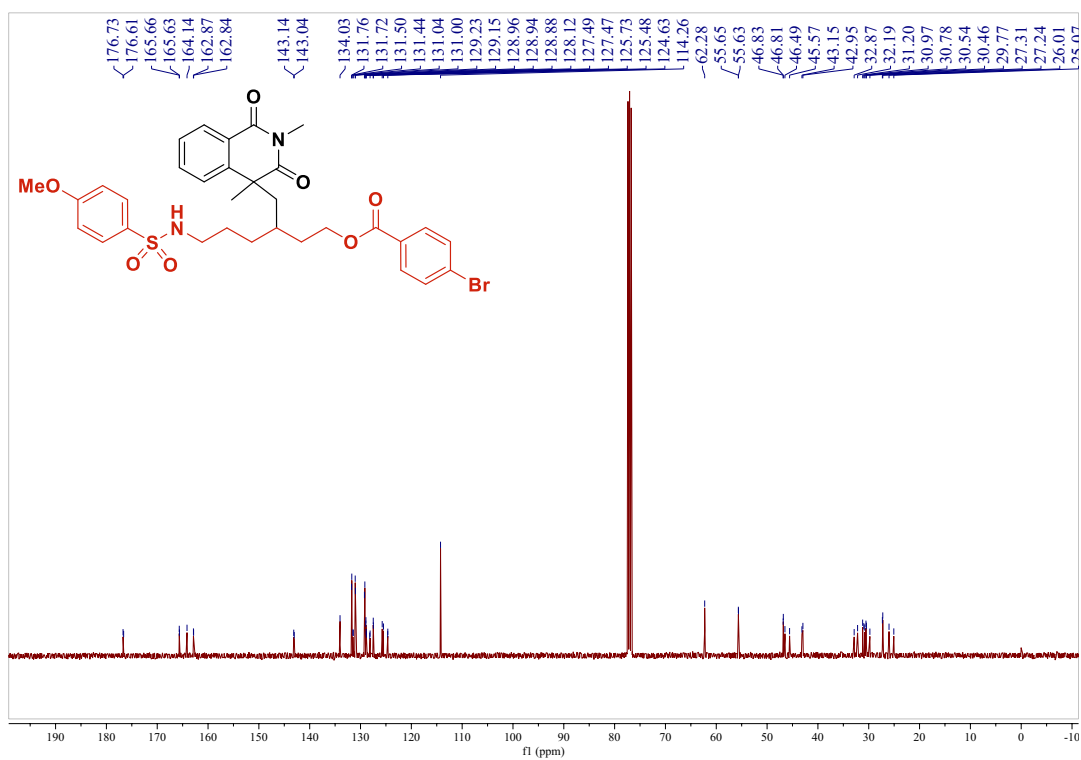



$^1\text{H}$  and  $^{13}\text{C}$  NMR spectra of **5aw**:

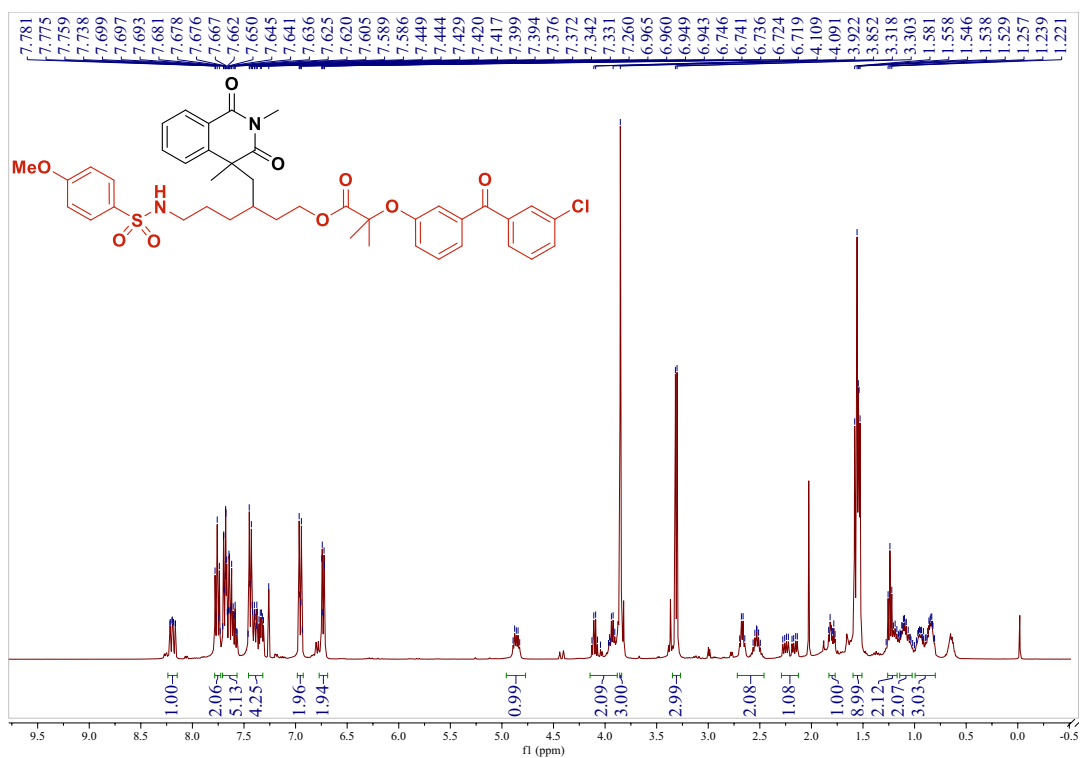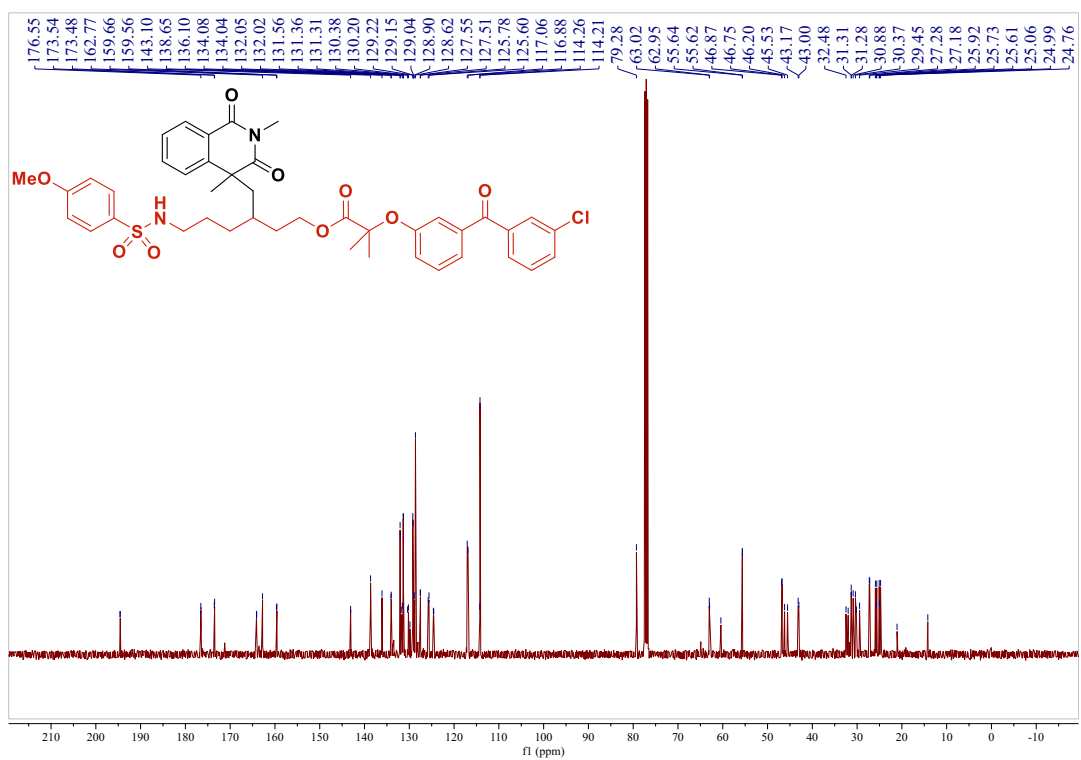

Supplement: d4cc00916a1.pdf [file d4cc00916a1.pdf]
